# Supplementary material
Source: publisher figshare collection journal article supplement (https://acs.figshare.com/ndownloader/files/16243532)
Supplement: Supplementary file 1 [file 16243532]

## **SUPPORTING INFORMATION**

# **A Rh-Catalyzed Cycloisomerization/Diels-Alder Cascade Reaction of 1,5-Bisallenes for the Synthesis of Polycyclic Heterocycles**

*Albert Artigas, Jordi Vila, Agustí Lledó, Miquel Solà, Anna Pla-Quintana, Anna Roglans.*

Institut de Química Computacional i Catàlisi (IQCC) and Departament de Química,  
Universitat de Girona (UdG), Facultat de Ciències, C/ Maria Aurèlia Capmany, 69, 17003-  
Girona, Catalunya, Spain.

## TABLE OF CONTENTS

|                                                                                                        |     |
|--------------------------------------------------------------------------------------------------------|-----|
| • General materials and methods.....                                                                   | S4  |
| • Scheme S1. Synthesis of diyne S1.....                                                                | S5  |
| • Scheme S2. Synthesis of bisallenes 1a-b.....                                                         | S5  |
| • Table S1. Optimization of the rhodium(I)-catalyzed cycloaddition of bisallene 1a with alkene 2a..... | S7  |
| • Synthesis of compounds 3aa-3bj.....                                                                  | S9  |
| • Scheme S3. General procedure for the synthesis of product 3aa.....                                   | S9  |
| • Compound 3ab.....                                                                                    | S10 |
| • Compound 3ac.....                                                                                    | S10 |
| • Compound 3ad.....                                                                                    | S11 |
| • Compound 3ae.....                                                                                    | S11 |
| • Compound 3af.....                                                                                    | S12 |
| • Compound 3ag.....                                                                                    | S12 |
| • Compound 3ah.....                                                                                    | S13 |
| • Compound 3ai.....                                                                                    | S13 |
| • Compound 3aj.....                                                                                    | S14 |
| • Compound 3ak.....                                                                                    | S14 |
| • Compound 3al.....                                                                                    | S15 |
| • Compound 3am.....                                                                                    | S15 |
| • Compound 3ba.....                                                                                    | S16 |
| • Compound 3bg.....                                                                                    | S16 |
| • Compound 3bj.....                                                                                    | S17 |
| • Scheme S4. Mechanistic experiments using compound 5a and ethyl acrylate 2a.....                      | S18 |
| • Scheme S5. Mechanistic experiments using compound 5a, ethyl acrylate 2a and Rh(I) catalyst.....      | S18 |
| • Scheme S6. Mechanistic experiments using compound 1a and Rh(I) catalyst.....                         | S19 |
| • <sup>1</sup> H and <sup>13</sup> C NMR spectra.....                                                  | S20 |
| • Diyne S1.....                                                                                        | S20 |
| • Bisallene 1a.....                                                                                    | S22 |
| • Bisallene 1b.....                                                                                    | S24 |
| • Product 3aa.....                                                                                     | S26 |
| • Product 3ab.....                                                                                     | S37 |
| • Product 3ac.....                                                                                     | S39 |
| • Product 3ad.....                                                                                     | S43 |
| • Product 3ae.....                                                                                     | S47 |
| • Product 3af.....                                                                                     | S50 |
| • Product 3ag.....                                                                                     | S53 |
| • Product 3ah.....                                                                                     | S56 |
| • Product 3ai.....                                                                                     | S59 |

|                                                                                                                                                                                                                                                                                                                                                                                                          |      |
|----------------------------------------------------------------------------------------------------------------------------------------------------------------------------------------------------------------------------------------------------------------------------------------------------------------------------------------------------------------------------------------------------------|------|
| • Product 3aj.....                                                                                                                                                                                                                                                                                                                                                                                       | S62  |
| • Product 3ak.....                                                                                                                                                                                                                                                                                                                                                                                       | S65  |
| • Product 3al.....                                                                                                                                                                                                                                                                                                                                                                                       | S68  |
| • Product 3am.....                                                                                                                                                                                                                                                                                                                                                                                       | S71  |
| • Product 3ba.....                                                                                                                                                                                                                                                                                                                                                                                       | S74  |
| • Product 3bg.....                                                                                                                                                                                                                                                                                                                                                                                       | S77  |
| • Product 3bj.....                                                                                                                                                                                                                                                                                                                                                                                       | S86  |
| • Product 4a.....                                                                                                                                                                                                                                                                                                                                                                                        | S89  |
| • Product 5a.....                                                                                                                                                                                                                                                                                                                                                                                        | S95  |
| • Product 6a.....                                                                                                                                                                                                                                                                                                                                                                                        | S97  |
| • HPLC .....                                                                                                                                                                                                                                                                                                                                                                                             | S106 |
| • Figure S1. HPLC trace of compound 3aa obtained using (±)-BINAP as a phosphine ligand.<br>.....                                                                                                                                                                                                                                                                                                         | S106 |
| • Figure S2. HPLC trace of compound 3aa obtained under optimal conditions, using ( <i>R</i> )-<br>DTBM-Segphos as a phosphine ligand. ....                                                                                                                                                                                                                                                               | S106 |
| • Crystal structure of compound 3am.....                                                                                                                                                                                                                                                                                                                                                                 | S107 |
| • Figure S3: ORTEP representation of compound 3am with probability level of 30%. ....                                                                                                                                                                                                                                                                                                                    | S107 |
| • Table S2. Sample and crystal data for 3am. ....                                                                                                                                                                                                                                                                                                                                                        | S108 |
| • Table S3. Data collection and structure refinement for 3am.....                                                                                                                                                                                                                                                                                                                                        | S108 |
| • Table S4. Atomic coordinates and equivalent isotropic atomic displacement parameters<br>(Å <sup>2</sup> ) for 3am. ....                                                                                                                                                                                                                                                                                | S109 |
| • Computational methods.....                                                                                                                                                                                                                                                                                                                                                                             | S110 |
| • Figure S4. Molecular structures of (a) TS A1A2, (b) TS A2A3, (c) TS A3A4, (d) TS A3'B1,<br>(e) TS A5-3aa' and (f) TS A5-3aa. Distances are given in Angstroms (Å). Hydrogen atoms<br>not shown for clarity. ....                                                                                                                                                                                       | S111 |
| • Figure S5. M06L-D3/cc-pVTZ-PP/SMD(76% THF, 24% CH <sub>2</sub> Cl <sub>2</sub> )/B3LYP-D3/cc-pVDZ-PP<br>Gibbs energy profile for the tandem cycloisomerisation/Diels-Alder cycloaddition of 1,5-<br>bisallene 1a and ethyl acrylate catalysed by [Rh(BINAP)] <sup>+</sup> . Alternative reaction path: Diels-<br>Alder cycloaddition involving intermediate A4. ....                                   | S112 |
| • Figure S6. M06L-D3/cc-pVTZ-PP/SMD(76% THF, 24% CH <sub>2</sub> Cl <sub>2</sub> )/B3LYP-D3/cc-pVDZ-PP<br>Gibbs energy profile for the tandem cycloisomerisation/Diels-Alder cycloaddition of 1,5-<br>bisallene 1a and ethyl acrylate catalysed by [Rh(BINAP)] <sup>+</sup> . Alternative reaction path: Diels-<br>Alder cycloaddition involving intermediate A3. ....                                   | S113 |
| • Figure S7. M06L-D3/cc-pVTZ-PP/SMD(76% THF, 24% CH <sub>2</sub> Cl <sub>2</sub> )/B3LYP-D3/cc-pVDZ-PP<br>Gibbs energy profile for the tandem cycloisomerisation/Diels-Alder cycloaddition of 1,5-<br>bisallene 1a and ethyl acrylate catalysed by [Rh(BINAP)] <sup>+</sup> . Alternative reaction path: Diels-<br>Alder cycloaddition involving intermediate A2. ....                                   | S114 |
| • Figure S8. (a) M06L-D3/cc-pVTZ-PP/SMD(76% THF, 24% CH <sub>2</sub> Cl <sub>2</sub> )/B3LYP-D3/cc-pVDZ-<br>PP Gibbs energy profile for the transformation of intermediate C1 into intermediate A2<br>catalysed by [Rh(BINAP)] <sup>+</sup> . (b) Molecular structure of TS C1A2. Distances are indicated in<br>Angstroms (Å). ΔG relative to 1a + catalyst. Hydrogen atoms suppressed for clarity. .... | S115 |
| • Computational data .....                                                                                                                                                                                                                                                                                                                                                                               | S116 |
| • References.....                                                                                                                                                                                                                                                                                                                                                                                        | S116 |

## General materials and methods

Unless otherwise noted, materials were obtained from commercial suppliers and used without further purification. CH<sub>2</sub>Cl<sub>2</sub> and THF were dried under nitrogen by passing through solvent purification columns (MBraun, SPS-800). Reaction progress during the preparation of all compounds was monitored using thin layer chromatography on Macherey-Nagel Xtra SIL G/UV254 silica gel plates. Solvents were removed under reduced pressure with a rotary evaporator. Reaction mixtures were chromatographed on silica gel. All <sup>1</sup>H and <sup>13</sup>C NMR spectra were recorded on a Bruker ASCEND 400 spectrometer equipped with a 5 mm BBFO probe using CDCl<sub>3</sub> as a deuterated solvent. Chemical shifts for <sup>1</sup>H and <sup>13</sup>C NMR are reported in ppm (δ) relative to residual solvent signals. Coupling constants are given in Hertz (Hz). <sup>1</sup>H and <sup>13</sup>C NMR signals were assigned based on 2D-NMR HSQC, HMBC, COSY and NOESY experiments. Mass spectrometry analyses were recorded on a Bruker micrOTOF-Q II mass spectrometer (high resolution), equipped with electrospray ion source. The instrument was operated in the positive ESI (+) ion mode. IR spectra were recorded on an Agilent Cary 630 FT-IR spectrometer equipped with an ATR sampling accessory. The X-ray intensity data were measured on a three-circle diffractometer system equipped with a Ceramic x-ray tube (Mo Kα, λ = 0.71073 Å) and a doubly curved silicon crystal Bruker Triumph monochromator. Melting points were measured in a SMP10 apparatus from Stuart without any correction. High performance liquid chromatography (HPLC) was performed using a CHIRALPAK IA column (4.6 x 250 mm, 5 μm) on an Agilent Technologies 1260 Infinity instrument, equipped with a quaternary pump G1311C, an auto sampler G1329B, a thermostatic column compartment G1316A and a variable wavelength UV-Vis detector G1314F.



### Scheme S1. Synthesis of diyne **S1**

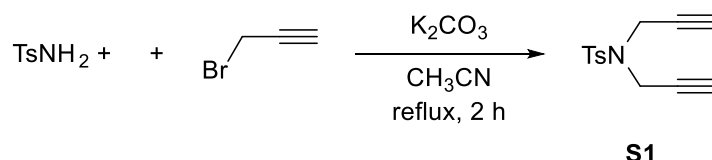

In a 100 mL round-bottom flask equipped with a reflux condenser and a magnetic stirrer, a mixture of 4-methylbenzenesulfonamide (1 g, 5.84 mmol),  $K_2CO_3$  (4.80 g, 34.73 mmol) and propargyl bromide (1.45 mL, 80 % in toluene, 1.60 mg, 13.42 mmol) in acetonitrile (60 mL) was stirred at 80 °C for 2 h until completion (TLC monitoring). The reaction mixture was allowed to cool to room temperature, the solids were filtered off and the filtrate was concentrated under reduced pressure to provide a yellowish oil which was purified by column chromatography ( $SiO_2$ , 40–60  $\mu$ m, Hexanes/ $CH_2Cl_2$  1:1 v/v) to afford diyne **S1** (1.33 g, 92% yield), as a colourless solid.

**MW** ( $C_{13}H_{13}NO_2S$ ): 247.3 g/mol; **Rf**: 0.33 (Hexanes/ $CH_2Cl_2$  1:1);  **$^1H$  NMR (400 MHz,  $CDCl_3$ )  $\delta$  (ppm)**: 2.14 (t,  $J$  = 2.4 Hz, 2H), 2.41 (s, 3H), 4.15 (d,  $J$  = 2.4 Hz, 4H), 7.28 (d,  $J$  = 8.4 Hz, 2H), 7.70 (d,  $J$  = 8.4 Hz, 2H);  **$^{13}C$  NMR (101 MHz,  $CDCl_3$ )  $\delta$  (ppm)**: 21.67, 36.27, 74.17, 76.24, 127.96, 129.67, 135.22, 144.11.; **ESI-MS (m/z)**:  $[M+H]^+ = 248.0$ . Spectral data in accordance with literature values.<sup>1</sup>

### Scheme S2. Synthesis of bisallenenes **1a-b**

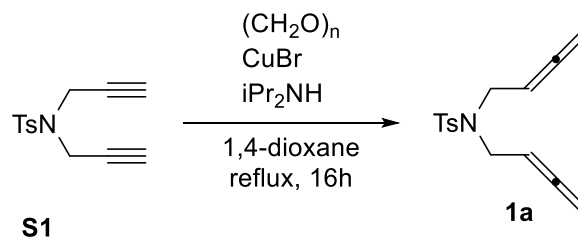

In a 250 mL round-bottom flask equipped with a reflux condenser and a magnetic stirrer, a suspension of diyne **S1** (6 g, 24.26 mmol), paraformaldehyde (3.64 g, 121.3 mmol) and CuBr (3.48 g, 24.26 mmol) in 1,4-dioxane (100 mL) was stirred and heated at reflux. Diisopropylamine (13.60 mL, 9.82 g, 97.04 mmol) was then added and the resulting mixture was stirred at reflux for 16 h until completion (TLC monitoring). The reaction mixture was allowed to cool to room temperature, filtered through a Celite pad and concentrated under reduced pressure. The resulting brown oil was mixed with  $Et_2O$  (200 mL) and water (100 mL) and the mixture was acidified to pH=2 with HCl 6M. The  $Et_2O$ /water layers were decanted from solid residues, the  $Et_2O$  layer was separated and the water layer was extracted with  $Et_2O$  (3 x 100 mL). The combined organic extracts were washed with water and brine, dried over anhydrous  $Na_2SO_4$  and concentrated under reduced pressure.

The crude product was purified by column chromatography (SiO<sub>2</sub>, 40–60 μm, Hexanes/EtOAc 95:5 v/v) to afford bisallene **1a** (4.10 g, 61% yield) as a colourless solid.

**MW** (C<sub>15</sub>H<sub>17</sub>NO<sub>2</sub>S): 275.4 g/mol; **Rf**: 0.50 (hexanes/EtOAc 8:2); **<sup>1</sup>H NMR (400 MHz, CDCl<sub>3</sub>) δ (ppm)**: 2.41 (s, 3H), 3.89 (dt, *J* = 6.8, 2.4 Hz, 4H), 4.70 (dt, *J* = 6.8, 2.4 Hz, 4H), 4.93 (p, *J* = 6.8 Hz, 2H), 7.29 (d, *J* = 8.4, 2H), 7.69 (d, *J* = 8.4 Hz, 2H); **<sup>13</sup>C NMR (101 MHz, CDCl<sub>3</sub>) δ (ppm)**: 21.61, 45.77, 76.27, 85.75, 127.27, 129.79, 137.66, 143.40, 209.78; **ESI-MS (m/z)**: [M+Na]<sup>+</sup>: 298.0. Spectral data in accordance with literature values.<sup>2</sup>

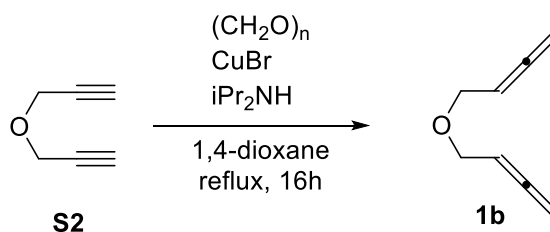

In a round-bottom flask equipped with a reflux condenser and a magnetic stirrer, a suspension of commercially available diyne **S2** (1.50 g, 15.96 mmol), paraformaldehyde (2.40 g, 80 mmol) and CuBr (2.30 g, 16.03 mmol) in 1,4-dioxane (60 mL) was stirred and heated at reflux. Diisopropylamine (9 mL, 6.48 g, 64 mmol) was then added and the resulting mixture was stirred for 16 h at reflux until completion (TLC monitoring). The reaction mixture was allowed to cool to room temperature, filtered through a Celite pad and concentrated under reduced pressure. The resulting brown oil was mixed with Et<sub>2</sub>O (120 mL) and water (60 mL) and the mixture was acidified to pH=2 with HCl 6M. The Et<sub>2</sub>O/water layers were decanted from any residues, the Et<sub>2</sub>O layer was separated and the water layer was extracted with Et<sub>2</sub>O (3 x 60 mL). The combined organic extracts were washed with water and brine, dried over anhydrous Na<sub>2</sub>SO<sub>4</sub> and concentrated under reduced pressure. The crude product was purified by column chromatography (SiO<sub>2</sub>, 40–60 μm, Hexanes/EtOAc 95:5 v/v) to provide bisallene **1b**<sup>1</sup> (394 mg, 20% yield) as a yellowish oil.

**MW** (C<sub>8</sub>H<sub>10</sub>O): 122.2 g/mol; **Rf**: 0.67 (hexanes/EtOAc 8:2); **IR (ATR) ν (cm<sup>-1</sup>)**: 2920, 2854, 1953, 1450, 1357, 1318, 1251, 1077; **<sup>1</sup>H NMR (400 MHz, CDCl<sub>3</sub>) δ (ppm)**: 4.03 (dt, *J* = 6.8, 2.4 Hz, 4H), 4.78 (dt, *J* = 6.8, 2.4 Hz, 4H), 5.23 (quint, *J* = 6.8 Hz, 2H); **<sup>13</sup>C NMR (101 MHz, CDCl<sub>3</sub>) δ (ppm)**: 67.68, 75.78, 87.67, 209.49.

**Table S1. Optimization of the rhodium(I)-catalyzed cycloaddition of bisallene **1a** with alkene **2a****

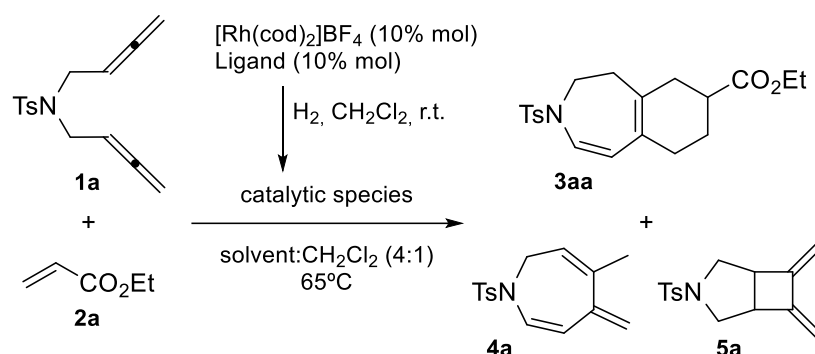

| Entry           | Ligand                             | Solvent      | [1a] (mM) | Temperature (°C) | 1a:2a ratio | Yield of 3aa / 4a / 5a (%) |
|-----------------|------------------------------------|--------------|-----------|------------------|-------------|----------------------------|
| 1               | ( <i>R</i> )-BINAP                 | Toluene      | 18        | 65               | 1:10        | 30 / 29 / -                |
| 2               | ( <i>R</i> )-BINAP                 | DCE          | 18        | 65               | 1:10        | - / - / -                  |
| 3               | ( <i>R</i> )-BINAP                 | Acetonitrile | 18        | 65               | 1:10        | 29 / 18 / -                |
| 4               | ( <i>R</i> )-BINAP                 | 1,4-Dioxane  | 18        | 65               | 1:10        | 42 / 53 / -                |
| 5               | ( <i>R</i> )-BINAP                 | EtOH         | 18        | 65               | 1:10        | 18 / 24 / -                |
| 6               | ( <i>R</i> )-BINAP                 | THF          | 18        | 65               | 1:10        | 46 / 39 / -                |
| 7               | ( <i>R</i> )-BINAP                 | THF          | 18        | 65               | 1:50        | 45 / 45 / -                |
| 8               | ( <i>R</i> )-BINAP                 | THF          | 9         | 65               | 1:10        | 46 / 52 / -                |
| 9               | ( <i>R</i> )-BINAP                 | THF          | 9         | 65               | 1:50        | 49 / 45 / -                |
| 10              | ( <i>R</i> )-Tol-BINAP             | THF          | 9         | 65               | 1:50        | 54 / 44 / -                |
| 11              | ( <i>R</i> )-H <sub>8</sub> -BINAP | THF          | 9         | 65               | 1:50        | 54 / 38 / -                |
| 12              | ( <i>R</i> )-Monophos              | THF          | 9         | 65               | 1:50        | 26 / 18 / -                |
| 13              | BIPHEP                             | THF          | 9         | 65               | 1:50        | - / 37 / -                 |
| 14              | ( <i>R</i> )-DTBM-Segphos          | THF          | 9         | 65               | 1:50        | 65 / 5 / 15                |
| 15              | ( <i>R</i> )-DTBM-Segphos          | THF          | 9         | 40               | 1:50        | 60 / - / 15                |
| 16 <sup>b</sup> | ( <i>R</i> )-DTBM-Segphos          | THF          | 9         | 40               | 1:50        | 44 / - / 15                |
| 17 <sup>c</sup> | -                                  | THF          | 9         | 40               | 1:50        | - / - / -                  |
| 18              | -                                  | THF          | 9         | 40               | 1:50        | - / - / -                  |

<sup>a</sup> Reaction conditions: 0.09 mmol of **1a**, 10-50 equivalents of **2a**, 10% mol of Rh catalyst in 10-20 mL of solvent:CH<sub>2</sub>Cl<sub>2</sub> (4:1) at 65°C for 4h or 40°C for 16h. The 10% mol mixture of [Rh(cod)<sub>2</sub>]BF<sub>4</sub> and phosphine was treated with hydrogen in dichloromethane (CH<sub>2</sub>Cl<sub>2</sub>) solution for catalyst activation prior to substrate addition. <sup>b</sup> The reaction was run with 5% mol of [Rh(cod)<sub>2</sub>]BF<sub>4</sub> and 5% mol of ligand.

<sup>c</sup> The reaction was run without [Rh(cod)<sub>2</sub>]BF<sub>4</sub>.

We started by studying the cycloaddition of *N*-tosyl-tethered bisallene **1a** and ethyl acrylate **2a** using 10% mol of cationic rhodium complex  $[\text{Rh}(\text{cod})_2]\text{BF}_4$  with (*R*)-BINAP in mixtures of solvents with 4:1 ratio (varying solvents:  $\text{CH}_2\text{Cl}_2$ ) at 65°C (entries 1-6). With a **1a:2a** ratio of 1:10 and a 18 mM concentration of bisallene (**1a**), two different compounds, **3aa** and **4a**, were obtained in varying quantities in all cases except when 1,2-dichloroethane (DCE) was used as co-solvent (entry 2). The best results were obtained with THF, which improved both the yield of **3aa** and its selectivity towards **4a** (entry 6). After a complete NMR analysis (see SI) of compound **3aa**, it was possible to determine the structure of the cycloadduct, confirming that a 4-aza-bicyclo[5.4.0]undeca-1(7),2-diene skeleton had been forged, purportedly originating from the oxidative coupling of the two external double bonds of **1a** and double bond isomerization. The seven-membered cross-conjugated triene **4a** was generated alongside **3aa** by cycloisomerization of the starting bisallene without participation of the alkene in an outcome that is complementary to the selectivity observed by Ma and Mukai.<sup>3-5</sup>

We next examined the effect of various reaction parameters on the efficiency of the process, focusing on improving the selectivity towards **3**. We varied two further parameters: first, the excess of the alkene was increased to 50 equiv. (entry 7) and, second, the concentration of the bisallene was reduced to 9 mM (entry 8). An additive effect was observed when the two factors were combined ( $[\text{1a}] = 9 \text{ mM}$  and 50 equiv. of **2a**, entry 9). We then resorted to a combination of a cationic rhodium complex  $[\text{Rh}(\text{cod})_2]\text{BF}_4$  with several phosphines as ligands: (*R*)-Tol-BINAP (entry 10), (*R*)-H<sub>8</sub>-BINAP (entry 11), (*R*)-Monophos (entry 12), BIPHEP (entry 13) and (*R*)-DTBM-Segphos (entry 14). Intriguingly, only triene **4a** was obtained in 37% yield using BIPHEP as the phosphine and the desired product - **3aa** - was not observed. When the bulky phosphine DTBM-Segphos was used, the yield of **3aa** was improved to 65%, and the yield of triene **4a** was reduced to 5%. However, another by-product **5a**, originating also from the cycloisomerization of the bisallene, was obtained in 15% yield. Lowering the temperature to 40°C avoided the formation of **4a**, resulting in our optimized set of conditions (entry 15). An attempt to reduce the catalyst loading from 10% to 5% was detrimental for the yield of **3aa**, and we therefore decided to work with a 10% mol of rhodium throughout our study.

Two control experiments were run. First, in the absence of the Rh catalyst (entry 17) and, second, in the presence of  $[\text{Rh}(\text{cod})_2]\text{BF}_4$  and without the bisphosphine (entry 18). Starting bisallene **1a** was recovered in both cases, revealing the essential role of the two components in this transformation.

## Synthesis of compounds 3aa-3bj

### Scheme S3. General procedure for the synthesis of product 3aa

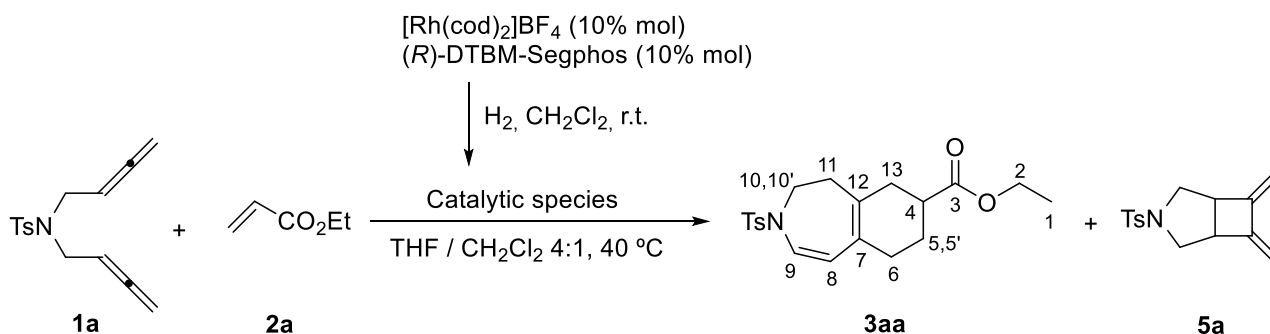

In a 10 mL capped vial, a mixture of  $[\text{Rh(cod)}_2]\text{BF}_4$  (7.4 mg, 0.018 mmol) and  $(R)\text{-DTBM-Segphos}$  (23.6 mg, 0.020 mmol) was purged with nitrogen and dissolved in anhydrous  $\text{CH}_2\text{Cl}_2$  (4 mL). Hydrogen gas was bubbled into the catalyst solution and the mixture was stirred for 30 min. The resulting mixture was concentrated to dryness under a stream of nitrogen, dissolved again in anhydrous  $\text{CH}_2\text{Cl}_2$  (4 mL) and transferred via syringe into a solution of bisallene **1a** (50 mg, 0.18 mmol, 1 equiv.) and ethyl acrylate **2a** (1.0 mL, 9.00 mmol, 50 equiv.) in anhydrous THF (16 mL) preheated to 40 °C and under inert atmosphere. The resulting mixture was stirred at 40 °C for 16h. The solvent was removed under reduced pressure and the crude reaction mixture was purified by column chromatography on silica gel using hexane/EtOAc mixtures as the eluent (98:2 to 95:5 v/v). Concentration under reduced pressure afforded compound **5a** (7.7 mg, 15% yield) as a colourless solid, and **3aa** (40.2 mg, 60% yield) as a pale yellow oil (in order of elution).

**3aa:** MW ( $\text{C}_{20}\text{H}_{25}\text{NO}_4\text{S}$ ): 375.48 g/mol; Rf: 0.49 (Hexane/EtOAc 8:2); IR (ATR)  $\nu$  ( $\text{cm}^{-1}$ ): 2924, 1724, 1344, 1161;  $^1\text{H NMR}$  (400 MHz,  $\text{CDCl}_3$ )  $\delta$  (ppm): 1.22 (t,  $J = 7.1$ , 3H, H1), 1.51 - 1.62 (m, 1H, H5/5'), 1.90 - 1.97 (m, 1H, H5/H5'), 2.05 - 2.13 (m, 2H, H11), 2.10 - 2.17 (m, 2H, H6), 2.15 - 2.33 (m, 2H, H13), 2.38 - 2.47 (m, 1H, H4), 2.42 (s, 3H,  $\text{CH}_3\text{-Ar}$ ), 3.47 (ddd,  $J = 13.4, 6.1, 3.0$  Hz, 1H, H10/10'), 3.64 - 3.71 (m, 1H, H10/H10'), 4.11 (q,  $J = 7.1$  Hz, 2H, H2), 4.86 (d,  $J = 10.3$  Hz, 1H, H8), 6.66 (d,  $J = 10.3$  Hz, 1H, H9), 7.30 (d,  $J = 8.2$  Hz, 2H, CH-Ar), 7.66 (d,  $J = 8.2$  Hz, 2H, CH-Ar);  $^{13}\text{C NMR}$  (101 MHz,  $\text{CDCl}_3$ )  $\delta$  (ppm): 14.35 (C1), 21.70 ( $\text{CH}_3\text{-Ar}$ ), 25.41 (C5), 30.91 (C6), 34.59 (C13), 36.32 (C11), 39.52 (C4), 47.08 (C10), 60.49 (C2), 110.58 (C8), 124.74 (C9), 126.11 (C7), 127.18 (CH-Ar), 130.01 (CH-Ar), 133.54 (C12), 135.72 (C-Ar), 143.96 (C-Ar), 175.57 (C3); ESI-HRMS ( $m/z$ ) calcd for  $[\text{M}+\text{Na}]^+ = 398.1397$ ; found 398.1405.

**5a:** MW ( $\text{C}_{15}\text{H}_{17}\text{NO}_2\text{S}$ ): 275.4 g/mol; Rf: 0.35 (Hexane/EtOAc 8:2);  $^1\text{H NMR}$  (400 MHz,  $\text{CDCl}_3$ )  $\delta$  (ppm): 2.43 (s, 3H), 2.75 (dd,  $J = 9.6, 6.0$  Hz, 2H), 3.28 - 3.34 (m, 2H), 3.62 (d,  $J = 9.6$  Hz, 2H), 4.80 (s, 2H), 5.22 (s, 2H), 7.31 (d,  $J = 8.3$  Hz, 2H), 7.68 (d,  $J = 8.3$  Hz, 2H);  $^{13}\text{C NMR}$  (101 MHz,  $\text{CDCl}_3$ )  $\delta$  (ppm): 21.68, 44.81, 53.49, 105.69, 128.24, 129.61, 132.28, 143.68, 149.15; ESI-MS ( $m/z$ )  $[\text{M}+\text{H}]^+ = 275.1$ . Spectral data in accordance with literature values.<sup>2</sup>

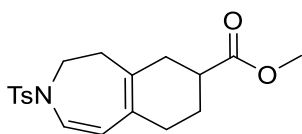

**Compound 3ab** was obtained from bisallene **1a** (52 mg, 0.19 mmol) and methyl acrylate (0.84 mL, 9.3 mmol), following the general procedure. Purification by column chromatography (silica gel, 40–63  $\mu$ m, Hexanes/EtOAc) provided **5a** (7.7 mg, 15% yield) as a colourless solid and **3ab** (36 mg, 53% yield) as a yellow oil.

**MW** ( $C_{19}H_{23}NO_4S$ ): 361.46 g/mol **Rf**: 0.31 (Hexane/EtOAc 8:2); **IR (ATR)  $\nu$  ( $cm^{-1}$ )**: 2924, 1727, 1341, 1158;  **$^1H$  NMR (400 MHz,  $CDCl_3$ )  $\delta$  (ppm)**: 1.51 - 1.63 (m, 1H), 1.91 - 1.98 (m, 1H), 2.06 - 2.33 (m, 6H), 2.40 - 2.50 (m, 1H), 2.42 (s, 3H), 3.48 (ddd,  $J$  = 13.4, 6.2, 3.0 Hz, 1H), 3.66 (s, 3H), 3.63 - 3.71 (m, 1H), 4.86 (d,  $J$  = 10.3 Hz, 1H), 6.66 (d,  $J$  = 10.3 Hz, 1H), 7.31 (d,  $J$  = 8.3 Hz, 2H), 7.66 (d,  $J$  = 8.3 Hz, 2H);  **$^{13}C$  NMR (101 MHz,  $CDCl_3$ )  $\delta$  (ppm)**: 21.70, 25.40, 30.90, 34.58, 36.33, 39.42, 47.08, 51.82, 110.52, 124.82, 126.15, 127.20, 130.02, 133.44, 135.76, 143.97, 176.00; **ESI-HRMS ( $m/z$ )** calcd for  $[M+Na]^+$  = 384.1240; found 384.1236.

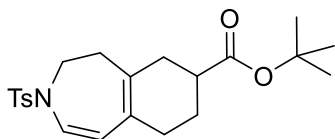

**Compound 3ac** was obtained from bisallene **1a** (49.6 mg, 0.18 mmol) and tert-butyl acrylate (1.36 mL, 98%, 9.1 mmol), following the general procedure. Purification by column chromatography (silica gel, 40–63  $\mu$ m, Hexanes/EtOAc) provided **5a** (7.1 mg, 14 %yield) as a colourless solid and **3ac** (36.6 mg, 50% yield) as a pale yellow oil.

**MW** ( $C_{22}H_{29}NO_4S$ ): 403.54 g/mol; **Rf**: 0.36 (Hexane/EtOAc 9:1); **IR (ATR)  $\nu$  ( $cm^{-1}$ )**: 2924, 1719, 1343, 1149;  **$^1H$  NMR (400 MHz,  $CDCl_3$ )  $\delta$  (ppm)**: 1.41 (s, 9H), 1.48 - 1.59 (m, 1H), 1.85 - 1.94 (m, 1H), 2.08 - 2.27 (m, 6H), 2.29 - 2.38 (m, 1H), 2.42 (s, 3H), 3.48 (ddd,  $J$  = 13.4, 6.1, 2.9 Hz, 1H), 3.63 - 3.71 (m, 1H), 4.86 (d,  $J$  = 10.3 Hz, 1H), 6.66 (d,  $J$  = 10.3 Hz, 1H), 7.30 (d,  $J$  = 8.4, 2H), 7.66 (d,  $J$  = 8.4 Hz, 2H);  **$^{13}C$  NMR (101 MHz,  $CDCl_3$ )  $\delta$  (ppm)**: 21.72, 25.48, 28.20, 30.95, 34.74, 36.35, 40.43, 47.12, 80.24, 110.73, 124.65, 126.09, 127.21, 130.02, 133.82, 135.78, 143.95, 174.99; **ESI-HRMS ( $m/z$ )** calcd for  $[M+Na]^+$  = 426.1710; found 426.1712.

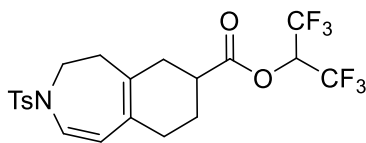

**Compound 3ad** was obtained from bisallene **1a** (51.8 mg, 0.19 mmol) and 1,1,1,3,3,3-hexafluoroisopropyl acrylate (1.55 mL, 99%, 9.2 mmol), following the general procedure. Purification by column chromatography (silica gel, 40–63  $\mu$ m, Hexanes/EtOAc) provided **3ad** (49.3 mg, 53% yield) as a yellowish oil and **5a** (4.3 mg, 8% yield) as a colourless solid.

**MW** ( $C_{21}H_{21}F_6NO_4S$ ): 497.45 g/mol; **Rf**: 0.40 (Hexane/EtOAc 9:1); **IR (ATR)  $\nu$  ( $cm^{-1}$ )**: 2926, 1772, 1349, 1197, 1163;  **$^1H$  NMR (400 MHz,  $CDCl_3$ )  $\delta$  (ppm)**: 1.65 - 1.77 (m, 1H), 1.98 - 2.06 (m, 1H), 2.11 - 2.40 (m, 6H), 2.45 (s, 3H), 2.67 - 2.76 (m, 1H), 3.52 (ddd,  $J$  = 13.6, 6.4, 2.9 Hz, 1H), 3.66 - 3.74 (m, 1H), 4.88 (d,  $J$  = 10.3 Hz, 1H), 5.76 (hept,  $^3J_{H-F}$  = 6.1 Hz, 1H), 6.72 (d,  $J$  = 10.3 Hz, 1H), 7.34 (d,  $J$  = 8.4 Hz, 2H), 7.69 (d,  $J$  = 8.4 Hz, 2H);  **$^{13}C$  NMR (101 MHz,  $CDCl_3$ )  $\delta$  (ppm)**: 21.71, 24.92, 30.28, 33.89, 36.21, 38.89, 47.00, 66.51 (quint,  $^2J_{C-F}$  = 34.7), 110.11, 120.53 (q,  $^1J_{C-F}$  = 283.3), 125.27, 126.37, 127.22, 130.06, 132.29, 135.66, 144.08, 172.16; **ESI-HRMS ( $m/z$ )** calcd for  $[M+Na]^+$  = 520.0988; found 520.1001.

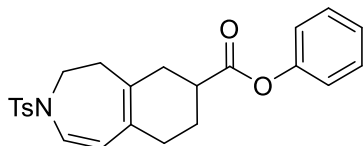

**Compound 3ae** was obtained from bis(allene) **1a** (50.2 mg, 0.18 mmol) and phenyl acrylate (1.25 mL, 9.1 mmol), following the general procedure. Purification by column chromatography (silica gel, 40–63  $\mu$ m, Hexanes/EtOAc 98:2 to 90:10) provided **3ae** (50.4 mg, 65% yield) as a pale yellow oil.

**MW** ( $C_{24}H_{25}NO_4S$ ): 423.53 g/mol; **Rf**: 0.24 (Hexane/EtOAc 9:1); **IR (ATR)  $\nu$  ( $cm^{-1}$ )**: 2923, 1748, 1340, 1157;  **$^1H$  NMR (400 MHz,  $CDCl_3$ )  $\delta$  (ppm)**: 1.69 - 1.80 (m, 1H), 2.07 - 2.18 (m, 3H), 2.19 - 2.27 (m, 2H), 2.30 - 2.49 (m, 2H), 2.42 (s, 3H), 2.68 - 2.77 (m, 1H), 3.51 (ddd,  $J$  = 13.4, 6.2, 2.9 Hz, 1H), 3.67 - 3.74 (m, 1H), 4.90 (d,  $J$  = 10.3 Hz, 1H), 6.70 (d,  $J$  = 10.3 Hz, 1H), 7.04 (dd,  $J$  = 8.6, 1.2 Hz, 2H), 7.19 - 7.24 (m, 1H), 7.31 (d,  $J$  = 8.4 Hz, 2H), 7.32 - 7.41 (m, 2H), 7.67 (d,  $J$  = 8.4 Hz, 2H);  **$^{13}C$  NMR (101 MHz,  $CDCl_3$ )  $\delta$  (ppm)**: 21.72, 25.39, 30.78, 34.45, 36.35, 39.61, 47.09, 110.45, 121.58, 124.97, 125.92, 126.26, 127.21, 129.55, 130.05, 133.21, 135.73, 144.02, 150.86, 174.04; **ESI-HRMS ( $m/z$ )** calcd for  $[M+Na]^+$  = 446.1397; found 446.1397.

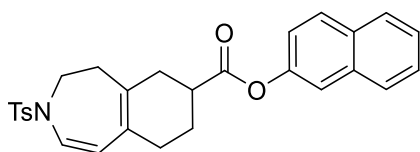

**Compound 3af** was obtained from bisallene **1a** (49.9 mg, 0.18 mmol) and naphthyl acrylate (909 mg, 4.6 mmol), following the general procedure. Purification by column chromatography (silica gel, 40–63  $\mu$ m, Hexanes/EtOAc 98:2 to 90:10) provided **3af** (58 mg, 68% yield) as a pale yellow solid.

**MW** ( $C_{28}H_{27}NO_4S$ ): 473.59 g/mol; **Rf**: 0.34 (Hexane/EtOAc 8:2); **MP** ( $^{\circ}C$ ): 144 - 146 (Hexane/EtOAc 9:1); **IR (ATR)  $\nu$  ( $cm^{-1}$ )**: 2921, 1745, 1345, 1161;  **$^1H$  NMR (400 MHz,  $CDCl_3$ )  $\delta$  (ppm)**: 1.73 - 1.86 (m, 1H), 2.12 - 2.30 (m, 5H), 2.34 - 2.54 (m, 2H), 2.42 (s, 3H), 2.74 - 2.82 (m, 1H), 3.53 (ddd,  $J$  = 13.4, 6.3, 2.9 Hz, 1H), 3.68 - 3.76 (m, 1H), 4.91 (d,  $J$  = 10.3 Hz, 1H), 6.71 (d,  $J$  = 10.3 Hz, 1H), 7.18 (dd,  $J$  = 8.9, 2.3 Hz, 1H), 7.32 (d,  $J$  = 8.3 Hz, 2H), 7.43 - 7.53 (m, 3H), 7.68 (d,  $J$  = 8.3 Hz, 2H), 7.79 (dd,  $J$  = 7.1, 2.1 Hz, 1H), 7.82 - 7.86 (m, 2H);  **$^{13}C$  NMR (101 MHz,  $CDCl_3$ )  $\delta$  (ppm)**: 21.72, 25.45, 30.83, 34.50, 36.37, 39.70, 47.10, 110.44, 118.53, 121.15, 125.01, 125.83, 126.29, 126.72, 127.21, 127.72, 127.90, 129.53, 130.05, 131.55, 133.20, 133.87, 135.73, 144.02, 148.50, 174.21; **ESI-HRMS ( $m/z$ )** calcd for  $[M+Na]^+$  = 496.1553; found 496.1547.

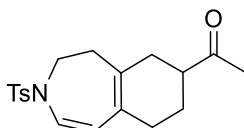

**Compound 3ag** was obtained from bisallene **1a** (49.5 mg, 0.18 mmol) and 3-buten-2-one (0.74 mL, 99%, 9.0 mmol), following the general procedure. Purification by column chromatography (silica gel, 40–63  $\mu$ m, Hexanes/EtOAc 98:2 to 90:10) provided **5a** (5.8 mg, 12% yield) as a colourless solid and **3ag** (45 mg, 72% yield) as a yellowish oil.

**MW** ( $C_{19}H_{23}NO_3S$ ): 345.46 g/mol; **Rf**: 0.17 (Hexane/EtOAc 8:2); **IR (ATR)  $\nu$  ( $cm^{-1}$ )**: 2921, 1703, 1342, 1160;  **$^1H$  NMR (400 MHz,  $CDCl_3$ )  $\delta$  (ppm)**: 1.41 - 1.50 (m, 1H), 1.89 - 1.96 (m, 1H), 2.04 - 2.27 (m, 6H), 2.14 (s, 3H), 2.41 (s, 3H), 2.44 - 2.53 (m, 1H), 3.46 (ddd,  $J$  = 13.5, 6.8, 2.3 Hz, 1H), 3.64 - 3.72 (m, 1H), 4.85 (d,  $J$  = 10.3 Hz, 1H), 6.66 (d,  $J$  = 10.3 Hz, 1H), 7.30 (d,  $J$  = 8.3 Hz, 2H), 7.65 (d,  $J$  = 8.3 Hz, 2H);  **$^{13}C$  NMR (101 MHz,  $CDCl_3$ )  $\delta$  (ppm)**: 21.69, 25.04, 28.16, 31.20, 33.77, 36.40, 47.05, 47.39, 110.46, 124.78, 126.10, 127.17, 130.01, 133.61, 135.70, 143.98, 211.19; **ESI-HRMS ( $m/z$ )** calcd for  $[M+Na]^+$  = 368.1291; found 368.1294.



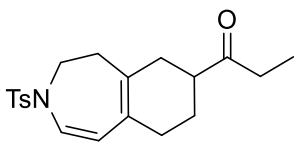

**Compound 3ah** was obtained from bisallene **1a** (50 mg, 0.18 mmol) and 1-penten-3-one (0.93 mL, 97%, 9.1 mmol), following the general procedure. Purification by column chromatography (silica gel, 40–63  $\mu$ m, Hexanes/EtOAc 98:2 to 90:10) provided **3ah** (48.8 mg, 75% yield) as a yellowish oil.

**MW** ( $C_{20}H_{25}NO_3S$ ): 359.48 g/mol; **Rf**: 0.29 (Hexane/EtOAc 8:2); **IR (ATR)  $\nu$  ( $cm^{-1}$ )**: 2924, 1704, 1342, 1160;  **$^1H$  NMR (400 MHz,  $CDCl_3$ )  $\delta$  (ppm)**: 1.03 (t,  $J$  = 7.3 Hz, 3H), 1.40 - 1.52 (m, 1H), 1.83 - 1.93 (m, 1H), 2.01 - 2.30 (m, 6H), 2.37 - 2.56 (m, 3H), 2.42 (s, 3H), 3.47 (ddd,  $J$  = 13.4, 7.1, 2.2 Hz, 1H), 3.65 – 3.74 (m, 1H), 4.86 (d,  $J$  = 10.3 Hz, 1H), 6.66 (d,  $J$  = 10.3 Hz, 1H), 7.31 (d,  $J$  = 8.4 Hz, 2H), 7.66 (d,  $J$  = 8.4 Hz, 2H);  **$^{13}C$  NMR (101 MHz,  $CDCl_3$ )  $\delta$  (ppm)**: 7.91, 21.72, 25.30, 31.30, 34.08, 34.10, 36.45, 46.47, 47.08, 110.53, 124.78, 126.08, 127.21, 130.03, 133.82, 135.76, 143.99, 213.86; **ESI-HRMS ( $m/z$ )** calcd for  $[M+Na]^+$  = 382.1447; found 382.1447.

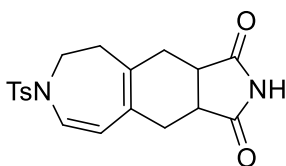

**Compound 3ai** was obtained from bisallene **1a** (50 mg, 0.18 mmol) and maleimide (88 mg, 0.91 mmol), following the general procedure. Purification by column chromatography (silica gel, 40–63  $\mu$ m, hexanes/EtOAc 8:2 to 1:1) provided **3ai** (51 mg, 76% yield) as a pale yellow solid.

**MW** ( $C_{19}H_{20}N_2O_4S$ ): 372.44 g/mol; **Rf**: 0.24 (Hexane/EtOAc 1:1); **MP ( $^{\circ}C$ )**: 221 - 223 (Hexane/EtOAc 1:1); **IR (ATR)  $\nu$  ( $cm^{-1}$ )**: 3220, 2924, 1775, 1699, 1331, 1157;  **$^1H$  NMR (400 MHz,  $CDCl_3$ )  $\delta$  (ppm)**: 2.25 - 2.35 (m, 4H), 2.42 (s, 3H), 2.44 - 2.56 (m, 2H), 3.02 - 3.12 (m, 2H), 3.41 - 3.57 (m, 2H), 4.97 (d,  $J$  = 9.9 Hz, 1H), 6.65 (d,  $J$  = 9.9 Hz, 1H), 7.31 (d,  $J$  = 8.3 Hz, 2H), 7.64 (d,  $J$  = 8.3 Hz, 2H), 8.06 (s, 1H);  **$^{13}C$  NMR (101 MHz,  $CDCl_3$ )  $\delta$  (ppm)**: 21.72, 31.95, 32.17, 38.10, 40.89, 41.00, 46.51, 110.13, 126.84, 127.18, 127.42, 130.10, 135.16, 135.66, 144.22, 179.60, 179.78; **ESI-HRMS ( $m/z$ )** calcd for  $[M+Na]^+$  = 395.1036; found 395.1043.

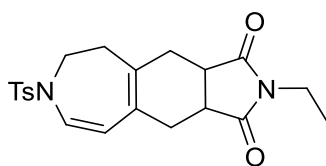

**Compound 3aj** was obtained from bisallene **1a** (49.8 mg, 0.18 mmol) and N-ethylmaleimide (603 mg, 4.8 mmol), following the general procedure. Purification by column chromatography (silica gel, 40–63  $\mu$ m, Hexanes/EtOAc 8:2 to 1:1) provided **3aj** (46.5 mg, 64% yield) as a pale yellow solid.

**MW** ( $C_{21}H_{24}N_2O_4S$ ): 400.49 g/mol; **Rf**: 0.37 (Hexane/EtOAc 1:1); **MP** ( $^{\circ}C$ ): 140 - 141 (Hexane/EtOAc 1:1); **IR (ATR)  $\nu$  ( $cm^{-1}$ )**: 2913, 1764, 1687, 1334, 1160;  **$^1H$  NMR (400 MHz,  $CDCl_3$ )  $\delta$  (ppm)**: 0.90 (t,  $J$  = 7.2 Hz, 3H), 2.14 - 2.36 (m, 4H), 2.41 (s, 3H), 2.47 - 2.58 (m, 2H), 2.94 - 3.04 (m, 2H), 3.39 (d,  $J$  = 7.2 Hz, 2H), 3.38 - 3.45 (m, 1H), 3.51 (ddd,  $J$  = 13.7, 6.9, 1.7 Hz, 1H), 4.96 (d,  $J$  = 10.0 Hz, 1H), 6.63 (d,  $J$  = 10.0 Hz, 1H), 7.28 (d,  $J$  = 8.3 Hz, 2H), 7.61 (d,  $J$  = 8.3 Hz, 2H);  **$^{13}C$  NMR (101 MHz,  $CDCl_3$ )  $\delta$  (ppm)**: 13.24, 21.69, 32.30, 32.55, 33.81, 37.94, 39.63, 39.71, 46.39, 110.14, 126.55, 127.14, 127.44, 130.04, 135.18, 135.59, 144.11, 179.43, 179.74; **ESI-HRMS ( $m/z$ )** calcd for  $[M+Na]^+$  = 423.1349; found 423.1348.

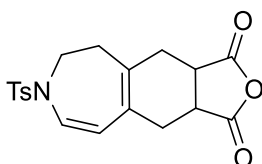

**Compound 3ak** was obtained from bisallene **1a** (49.6 mg, 0.18 mmol) and maleic anhydride (446 mg, 4.5 mmol), following the general procedure. Purification by column chromatography (silica gel, 40–63  $\mu$ m, Hexanes/EtOAc 8:2 to 1:1) provided **3ak** (54.8 mg, 81% yield) as a yellow solid.

**MW** ( $C_{19}H_{19}NO_5S$ ): 373.42 g/mol; **Rf**: 0.46 (Hexane/EtOAc 1:1); **MP** ( $^{\circ}C$ ): 156 - 157 (Hexane/EtOAc 1:1); **IR (ATR)  $\nu$  ( $cm^{-1}$ )**: 2919, 1841, 1769, 1348, 1159;  **$^1H$  NMR (400 MHz,  $CDCl_3$ )  $\delta$  (ppm)**: 2.17 - 2.26 (m, 1H), 2.31 - 2.41 (m, 3H), 2.44 (s, 3H), 2.50 - 2.62 (m, 2H), 3.27 - 3.38 (m, 2H), 3.49 - 3.55 (m, 2H), 4.98 (d,  $J$  = 10 Hz, 1H), 6.71 (d,  $J$  = 10 Hz, 1H), 7.32 (d,  $J$  = 8.4 Hz, 2H), 7.63 (d,  $J$  = 8.4 Hz, 2H);  **$^{13}C$  NMR (101 MHz,  $CDCl_3$ )  $\delta$  (ppm)**: 21.73, 32.07, 32.20, 37.97, 40.26, 40.33, 46.30, 109.70, 127.09, 127.67, 127.76, 130.22, 134.93, 135.51, 144.49, 173.80, 174.09; **ESI-HRMS ( $m/z$ )** calcd for  $[M+Na]^+$  = 396.0876; found 396.0876.

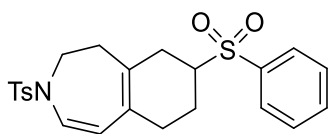

**Compound 3al** was obtained from bisallene **1a** (50.1 mg, 0.18 mmol) and phenyl vinyl sulfone (828 mg, 4.9 mmol), following the general procedure. Purification by column chromatography (silica gel, 40–63  $\mu$ m, Hexanes/EtOAc 98:2 to 90:10) provided **3al** (24.7 mg, 31% yield) as a pale yellow solid.

**MW** ( $C_{23}H_{25}NO_4S_2$ ): 443.58 g/mol; **Rf**: 0.29 (Hexane/EtOAc 7:3); **MP** ( $^{\circ}C$ ): 104 - 109 (dec.), (Hexane/EtOAc 9:1); **IR (ATR)  $\nu$  ( $cm^{-1}$ )**: 2923, 1343, 1302, 1160, 1143;  **$^1H$  NMR (400 MHz,  $CDCl_3$ )  $\delta$  (ppm)**: 1.37 - 1.50 (m, 1H), 1.92 - 2.15 (m, 6H), 2.20 - 2.28 (m, 1H), 2.32 (s, 3H), 2.91 - 3.01 (m, 1H), 3.34 (ddd,  $J$  = 13.6, 7.0, 2.3 Hz, 1H), 3.50 - 3.57 (m, 1H), 4.71 (d,  $J$  = 10.3 Hz, 1H), 6.57 (d,  $J$  = 10.3 Hz, 1H), 7.20 (d,  $J$  = 8.4 Hz, 2H), 7.43 - 7.50 (m, 2H), 7.51 - 7.59 (m, 3H), 7.72 - 7.81 (m, 2H);  **$^{13}C$  NMR (101 MHz,  $CDCl_3$ )  $\delta$  (ppm)**: 21.73, 22.19, 30.83, 31.29, 36.21, 46.87, 60.18, 109.54, 125.61, 126.45, 127.20, 129.08, 129.32, 130.09, 131.46, 133.93, 135.56, 137.27, 144.16; **ESI-HRMS ( $m/z$ )** calcd for  $[M+Na]^+$  = 466.1117; found 466.1117.

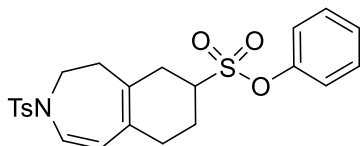

**Compound 3am** was obtained from bisallene **1a** (50.3 mg, 0.18 mmol) and phenyl vinyl sulfonate (1.0 g 5.4 mmol), following the general procedure. Purification by column chromatography (silica gel, 40–63  $\mu$ m, Hexanes/EtOAc 98:2 to 90:10) provided **3am** (50.2 mg, 60% yield) as a colourless solid.

**MW** ( $C_{23}H_{25}NO_5S_2$ ): 459.57 g/mol; **Rf**: 0.48 (Hexane/EtOAc 7:3); **MP** ( $^{\circ}C$ ): 125 - 126 (Hexane/EtOAc 9:1); **IR (ATR)  $\nu$  ( $cm^{-1}$ )**: 2919, 1364, 1341, 1159, 1143;  **$^1H$  NMR (400 MHz,  $CDCl_3$ )  $\delta$  (ppm)**: 1.78 - 1.92 (m, 1H), 2.08 - 2.24 (m, 2H), 2.30 (d,  $J$  = 7.6 Hz, 2H), 2.34 - 2.41 (m, 1H), 2.43 (s, 3H), 2.47 - 2.55 (m, 1H), 2.58 - 2.69 (m, 1H), 3.29 - 3.40 (m, 1H), 3.49 (ddd,  $J$  = 13.6, 7.0, 2.3 Hz, 1H), 3.67 - 3.75 (m, 1H), 4.87 (d,  $J$  = 10.3 Hz, 1H), 6.73 (d,  $J$  = 10.3 Hz, 1H), 7.21 - 7.25 (m, 2H), 7.27 - 7.30 (m, 1H), 7.32 (d,  $J$  = 8.3 Hz, 2H), 7.36 - 7.42 (m, 2H), 7.66 (d,  $J$  = 8.3 Hz, 2H);  **$^{13}C$  NMR (101 MHz,  $CDCl_3$ )  $\delta$  (ppm)**: 21.74, 23.21, 30.59, 32.10, 36.18, 46.89, 56.81, 109.39, 122.09, 125.88, 126.55, 127.22, 127.25, 130.09, 130.12, 131.06, 135.56, 144.21, 149.05; **ESI-HRMS ( $m/z$ )** calcd for  $[M+Na]^+$  = 482.1066; found 482.1078.

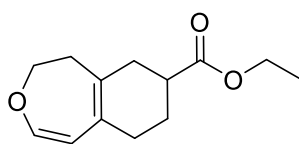

**Compound 3ba** was obtained from bisallene **1b** (23.4 mg, 0.19 mmol) and ethyl acrylate (1.0 mL, 99%, 9.1 mmol), following the general procedure. Purification by column chromatography (silica gel, 40–63  $\mu$ m, Hexanes/EtOAc 99:1) provided **3ba** (7.2 mg, 17% yield) as a pale yellow oil.

**MW** ( $C_{13}H_{18}O_3$ ): 222.28 g/mol; **Rf**: 0.61(Hexane/EtOAc 9:1); **IR (ATR)  $\nu$  ( $cm^{-1}$ )**: 2924, 1729;  **$^1H$  NMR (400 MHz,  $CDCl_3$ )  $\delta$  (ppm)**: 1.26 (t,  $J$  = 7.1 Hz, 3H), 1.57 - 1.69 (m, 1H), 1.95 - 2.02 (m, 1H), 2.08 - 2.20 (m, 2H), 2.22 - 2.44 (m, 3H), 2.45 - 2.54 (m, 2H), 4.07 - 4.22 (m, 2H), 4.14 (q,  $J$  = 7.1 Hz, 2H), 4.57 (d,  $J$  = 7.9 Hz, 1H), 6.26 (d,  $J$  = 7.9 Hz, 1H);  **$^{13}C$  NMR (101 MHz,  $CDCl_3$ )  $\delta$  (ppm)**: 14.40, 25.54, 30.72, 34.27, 38.90, 39.77, 60.49, 70.09, 105.83, 126.20, 131.98, 145.02, 175.86; **ESI-HRMS ( $m/z$ )** calcd for  $[M+Na]^+$  = 245.1148; found 245.1146.

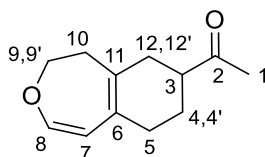

**Compound 3bg** was obtained from bisallene **1b** (23.4 mg, 0.19 mmol) and 3-buten-2-one (0.74, 99%, mL, 9.0 mmol), following the general procedure. Purification by column chromatography (silica gel, 40–63  $\mu$ m, Hexanes/EtOAc 98:2) provided **3bg** (10.0 mg, 27% yield) as a pale yellow oil.

**MW** ( $C_{12}H_{16}O_2$ ): 192.26 g/mol; **Rf**: 0.49 (Hexane/EtOAc 8:2); **IR (ATR)  $\nu$  ( $cm^{-1}$ )**: 2923, 1704;  **$^1H$  NMR (400 MHz,  $CDCl_3$ )  $\delta$  (ppm)**: 1.44 - 1.57 (m, 1H, H4/H4'), 1.92 - 2.01 (m, 1H, H4/H4'), 2.09 - 2.22 (m, 3H, H5, H12/H12'), 2.18 (s, 3H, H1), 2.23 - 2.34 (m, 1H, H12/H12'), 2.36 - 2.50 (m, 2H, H10), 2.50 - 2.60 (m, 1H, H3), 4.11 (ddd,  $J$  = 10.9, 6.8, 1.6 Hz, 1H, H9/H9'), 4.18 (ddd,  $J$  = 10.9, 5.9, 2.0 Hz, 1H, H9/H9'), 4.57 (d,  $J$  = 7.8 Hz, 1H, H7), 6.26 (d,  $J$  = 7.8 Hz, 1H, H8);  **$^{13}C$  NMR (101 MHz,  $CDCl_3$ )  $\delta$  (ppm)**: 25.13 (C4), 28.21 (C1), 31.00 (C5), 33.51 (C12), 38.96 (C10), 47.70 (C3), 70.05 (C9), 105.73 (C7), 126.23 (C6), 132.01 (C11), 145.08 (C8), 211.52 (C2); **ESI-HRMS ( $m/z$ )** calcd for  $[M+Na]^+$  = 215.1043; found 215.1037.

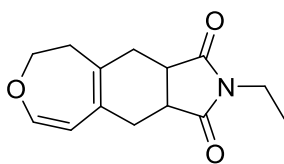

**Compound 3bj** was obtained from bisallene **1b** (23.4 mg, 0.19 mmol) and N-ethylmaleimide (580 mg, 4.6 mmol), following the general procedure. Purification by column chromatography (silica gel, 40–63  $\mu$ m, Hexanes/EtOAc 95:5 to 80:20) provided **3bj** (15.0 mg, 32% yield) as a pale yellow oil.

**MW** ( $C_{14}H_{17}NO_3$ ): 247.29 g/mol; **Rf**: 0.21(Hexane/EtOAc 8:2); **IR (ATR)  $\nu$  ( $cm^{-1}$ )**: 2922, 1763, 1684;  **$^1H$  NMR (400 MHz,  $CDCl_3$ )  $\delta$  (ppm)**: 1.07 (t,  $J$  = 7.2 Hz, 3H), 2.27 - 2.38 (m, 2H), 2.47 - 2.63 (m, 4H), 2.99 - 3.06 (m, 2H), 3.48 (q,  $J$  = 7.2 Hz, 2H), 4.00 (ddd,  $J$  = 11.2, 6.2, 2.1 Hz, 1H), 4.09 (ddd,  $J$  = 11.2, 6.1, 2.2 Hz, 1H), 4.68 (d,  $J$  = 7.6 Hz, 1H), 6.25 (d,  $J$  = 7.6 Hz, 1H);  **$^{13}C$  NMR (101 MHz,  $CDCl_3$ )  $\delta$  (ppm)**: 13.34, 31.83, 31.89, 33.90, 39.76, 39.79, 40.00, 69.63, 105.85, 127.48, 133.53, 147.04, 179.71, 180.02; **ESI-HRMS ( $m/z$ )** calcd for  $[M+Na]^+$  = 270.1101; found 270.1107.

#### Compound 4a

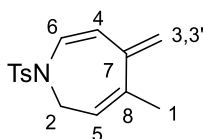

**MW** ( $C_{15}H_{17}NO_2S$ ): 275.4 g/mol; **Rf**: 0.50 (Hexanes/EtOAc 8:2); **IR (ATR)  $\nu$  ( $cm^{-1}$ )**: 2921, 2852, 1456, 1337, 1158, 1090;  **$^1H$  NMR (400 MHz,  $CDCl_3$ )  $\delta$  (ppm)**: 1.76 (s, 3H, H1), 2.41 (s, 3H,  $CH_3$ -Ar), 3.95 (d,  $J$  = 7.2 Hz, 2H, H2), 5.02 (s, 1H, H3/H3'), 5.09 (s, 1H, H3/H3'), 5.37 (d,  $J$  = 10.4 Hz, 1H, H4), 5.55 (t,  $J$  = 7.2 Hz, 1H, H5), 6.52 (d,  $J$  = 10.4, 1H, H6), 7.28 (d,  $J$  = 8.4 Hz, 2H, H-Ar), 7.66 (d,  $J$  = 8.4, 2H, H-Ar);  **$^{13}C$  NMR (101 MHz,  $CDCl_3$ )  $\delta$  (ppm)**: 21.64 ( $CH_3$ -Ar), 23.01 (C1), 45.60 (C2), 113.72 (C4), 117.68 (C3), 120.91 (C5), 127.01 (C6), 127.13 (CH-Ar), 129.83 (CH-Ar), 136.24 (C-Ar), 142.06 (C7), 143.46 (C8), 143.90 (C-Ar); **ESI-HRMS ( $m/z$ )** calcd for  $[M+Na]^+$  = 298.0872; found: 298.0875.

#### Scheme S4. Mechanistic experiments using compound **5a** and ethyl acrylate **2a**

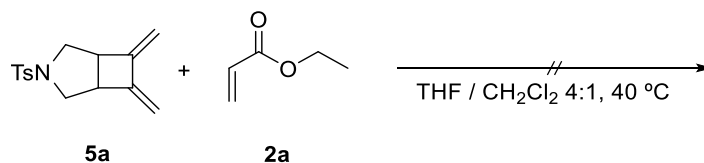

In a 25 mL round-bottom flask equipped with a magnetic stirrer and an inert atmosphere, a solution of **5a** (15 mg, 0.055 mmol) and ethyl acrylate **2a** (0.3 mL, 275 mg, 2.75 mmol) in a 4:1 mixture of THF/CH<sub>2</sub>Cl<sub>2</sub> (6 mL) was stirred at 40 °C for 16h. The solvent and ethyl acrylate **2a** were removed under reduced pressure. <sup>1</sup>H NMR analysis of the crude product revealed the presence of unaltered starting material **5a**.

#### Scheme S5. Mechanistic experiments using compound **5a**, ethyl acrylate **2a** and Rh(I) catalyst

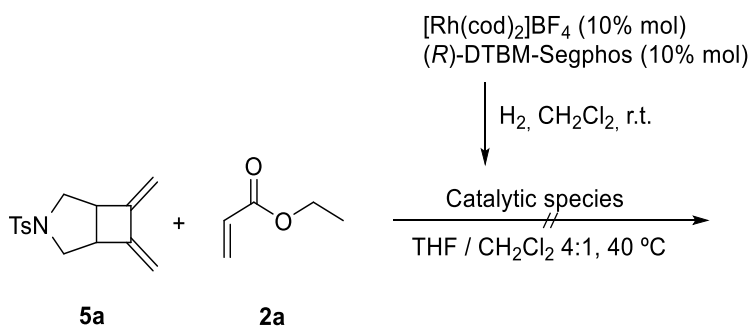

In a 10 mL capped vial, a mixture of [Rh(cod)<sub>2</sub>]BF<sub>4</sub> (4.26 mg, 0.010 mmol) and (*R*)-DTBM-Segphos (12.4 mg, 0.011 mmol) was purged with nitrogen and dissolved in anhydrous CH<sub>2</sub>Cl<sub>2</sub> (4 mL). Hydrogen gas was bubbled into the catalyst solution for 30 min. The resulting mixture was concentrated to dryness, dissolved again in anhydrous CH<sub>2</sub>Cl<sub>2</sub> (2 mL) and transferred via syringe into a 40 °C preheated solution of **5a** (29 mg, 0.11 mmol) and ethyl acrylate **2a** (0.6 mL, 550 mg, 5.33 mmol) in anhydrous THF (10 mL) and under inert atmosphere. The resulting mixture was stirred at 40 °C for 16h. The solvent and ethyl acrylate **2a** were removed under reduced pressure and the crude reaction mixture was filtered through a short silica gel pad (Hexanes/EtOAc 8:2 v/v). <sup>1</sup>H NMR analysis of the crude product revealed the presence of unaltered starting material **5a**.

## Scheme S6. Mechanistic experiments using compound **1a** and Rh(I) catalyst

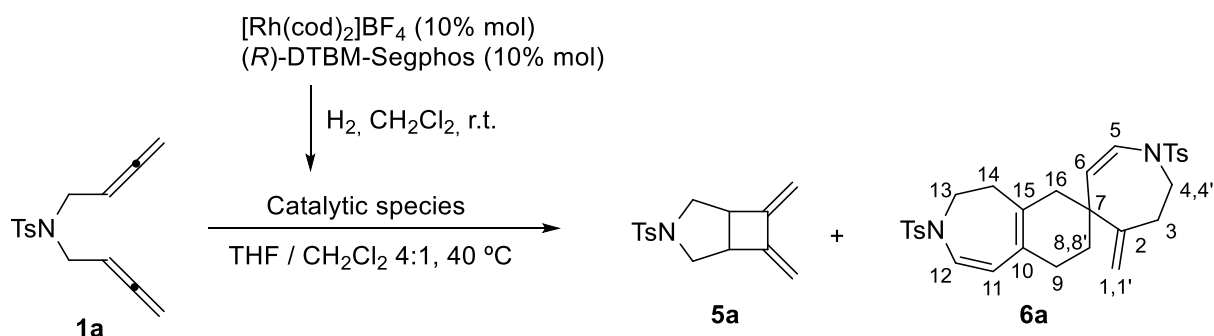

In a 10 mL capped vial, a mixture of  $[\text{Rh}(\text{cod})_2]\text{BF}_4$  (7.4 mg, 0.018 mmol) and  $(R)\text{-DTBM-Segphos}$  (23.6 mg, 0.020 mmol) was purged with nitrogen and dissolved in anhydrous  $\text{CH}_2\text{Cl}_2$  (4 mL). Hydrogen gas was bubbled into the catalyst solution and the mixture was stirred for 30 min. The resulting mixture was concentrated to dryness, dissolved again in anhydrous  $\text{CH}_2\text{Cl}_2$  (4 mL) and transferred via syringe into a preheated solution to  $40^\circ\text{C}$  of bisallene **1a** (48.4 mg, 0.18 mmol) in anhydrous THF (16 mL) and under inert atmosphere. The resulting mixture was stirred at  $40^\circ\text{C}$  for 16 h. The solvent was removed under reduced pressure and the crude reaction mixture was purified by column chromatography on silica gel using hexane/EtOAc mixtures as the eluent (95:5 to 90:10 v/v), affording first, compound **5a** (5.5 mg, 12% yield) as a colourless solid, and second, **6a** (28.3 mg, 58% yield) as a pale yellow solid.

**6a**: **MW** ( $\text{C}_{30}\text{H}_{34}\text{N}_2\text{O}_4\text{S}_2$ ): 550.73 g/mol; **Rf**: 0.26 (Hexane/EtOAc 8:2); **MP** ( $^\circ\text{C}$ ): 87-92 (dec); **IR** (ATR)  $\nu(\text{cm}^{-1})$ : 2921, 1336, 1156;  $^1\text{H}$  NMR (400 MHz,  $\text{CDCl}_3$ )  $\delta$  (ppm): 1.46 - 1.55 (m, 1H, H8/H8'), 1.56 - 1.66 (m, 1H, H8/H8'), 1.93 - 2.20 (m, 6H, H9, H14, H16), 2.42 (s, 3H,  $\text{CH}_3\text{-Ar}$ ), 2.42 (s, 3H,  $\text{CH}_3\text{-Ar}$ ), 2.43 - 2.55 (m, 2H, H3), 3.38 - 3.48 (m, 1H, H4/H4'), 3.49 - 3.66 (m, 3H, H4/H4', H13), 4.52 (s, 1H, H1/H1'), 4.63 (s, 1H, H1/H1'), 4.71 (d,  $J = 9.5$  Hz, 1H, H6), 4.84 (d,  $J = 10.3$  Hz, 1H, H11), 6.27 (d,  $J = 9.5$  Hz, 1H, H5), 6.64 (d,  $J = 10.3$  Hz, 1H, H12), 7.28 (d,  $J = 8.2$  Hz, 2H, CH-Ar), 7.31 (d,  $J = 8.2$  Hz, 2H, CH-Ar), 7.66 (m, 4H, CH-Ar);  $^{13}\text{C}$  NMR (101 MHz,  $\text{CDCl}_3$ )  $\delta$  (ppm): 21.67 ( $\text{CH}_3\text{-Ar}$ ), 21.71 ( $\text{CH}_3\text{-Ar}$ ), 29.10 (C9), 32.71 (C8), 34.74 (C3), 36.69 (C14), 42.46 (C7), 44.58 (C16), 47.03 (C13), 50.10 (C4), 110.59 (C11), 111.82 (C1), 122.64 (C6), 124.72 (C12), 125.67 (C5), 125.83 (C10), 127.18 (CH-Ar), 127.19 (CH-Ar), 129.78 (CH-Ar), 130.01 (CH-Ar), 132.95 (C15), 135.83 (C-Ar), 136.25 (C-Ar), 143.72 (C-Ar), 143.97 (C-Ar), 149.30 (C2); **ESI-MS** ( $m/z$ ) calcd for  $[\text{M}+\text{Na}]^+ = 573.1852$ ; found 573.1836.

<sup>1</sup>H and <sup>13</sup>C NMR spectra

Diyne S1

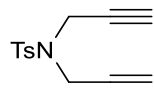

<sup>1</sup>H NMR (400 MHz, CDCl<sub>3</sub>)

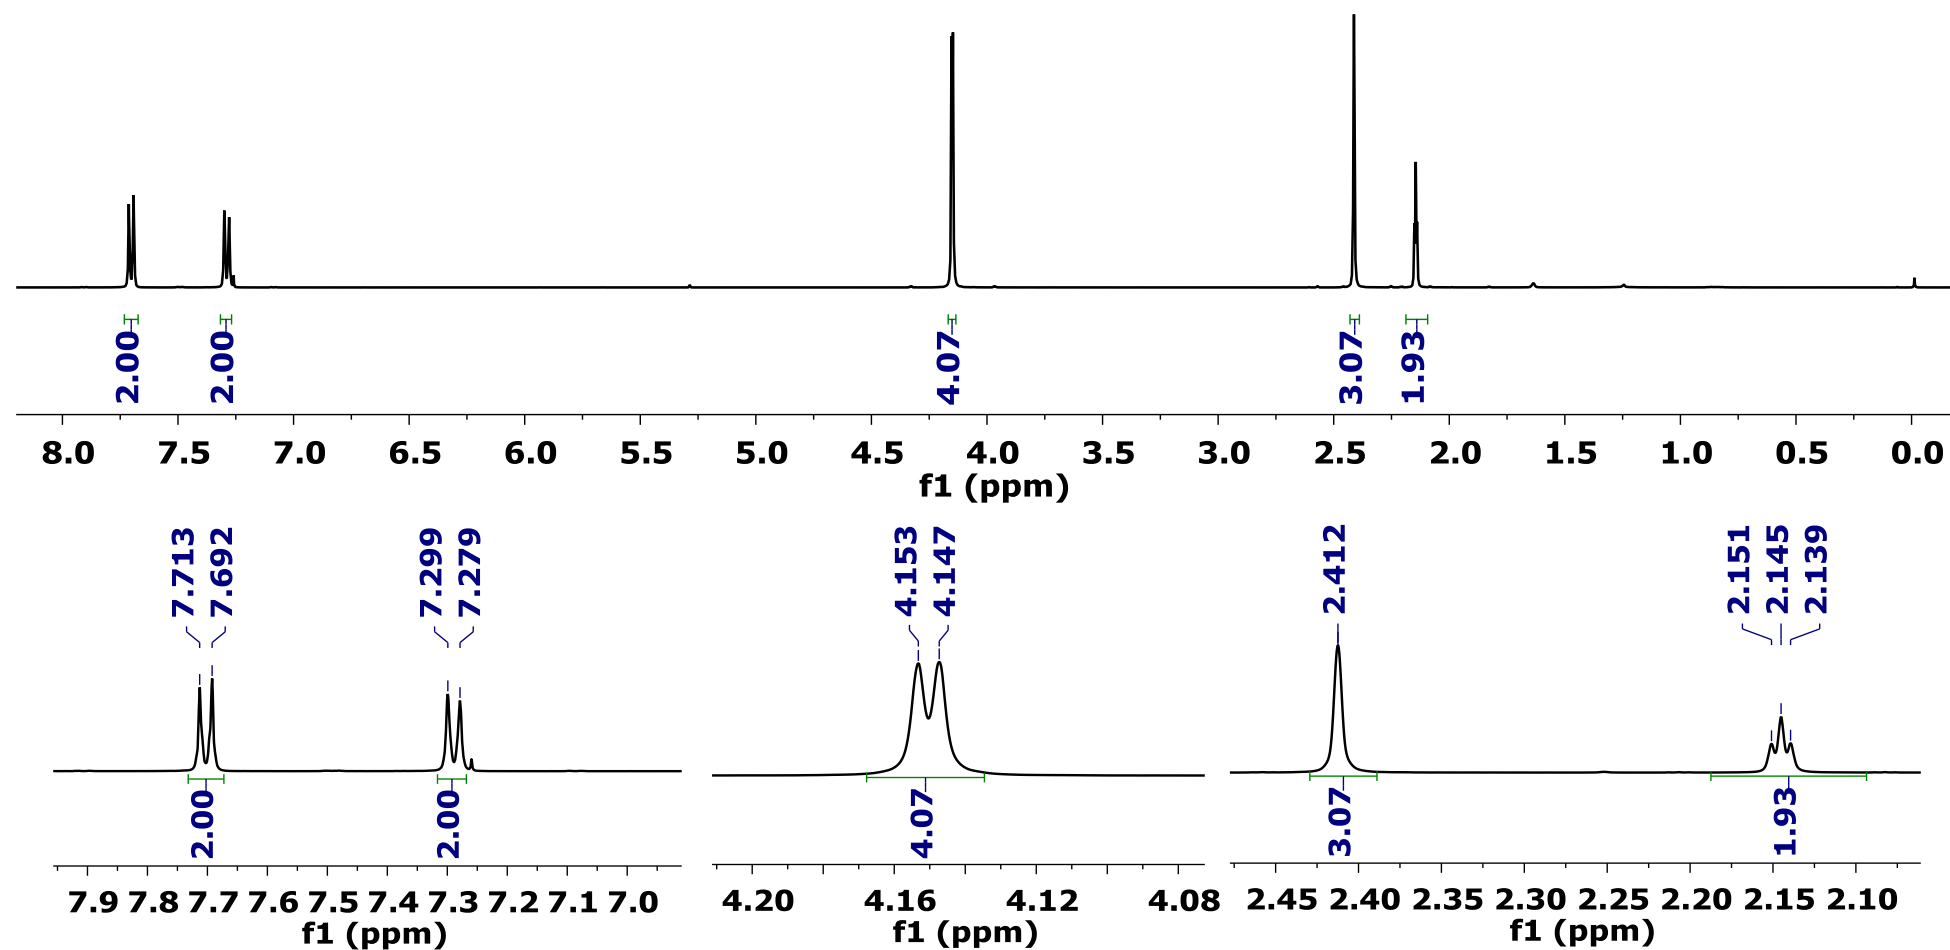



<sup>13</sup>C NMR (101 MHz, CDCl<sub>3</sub>)

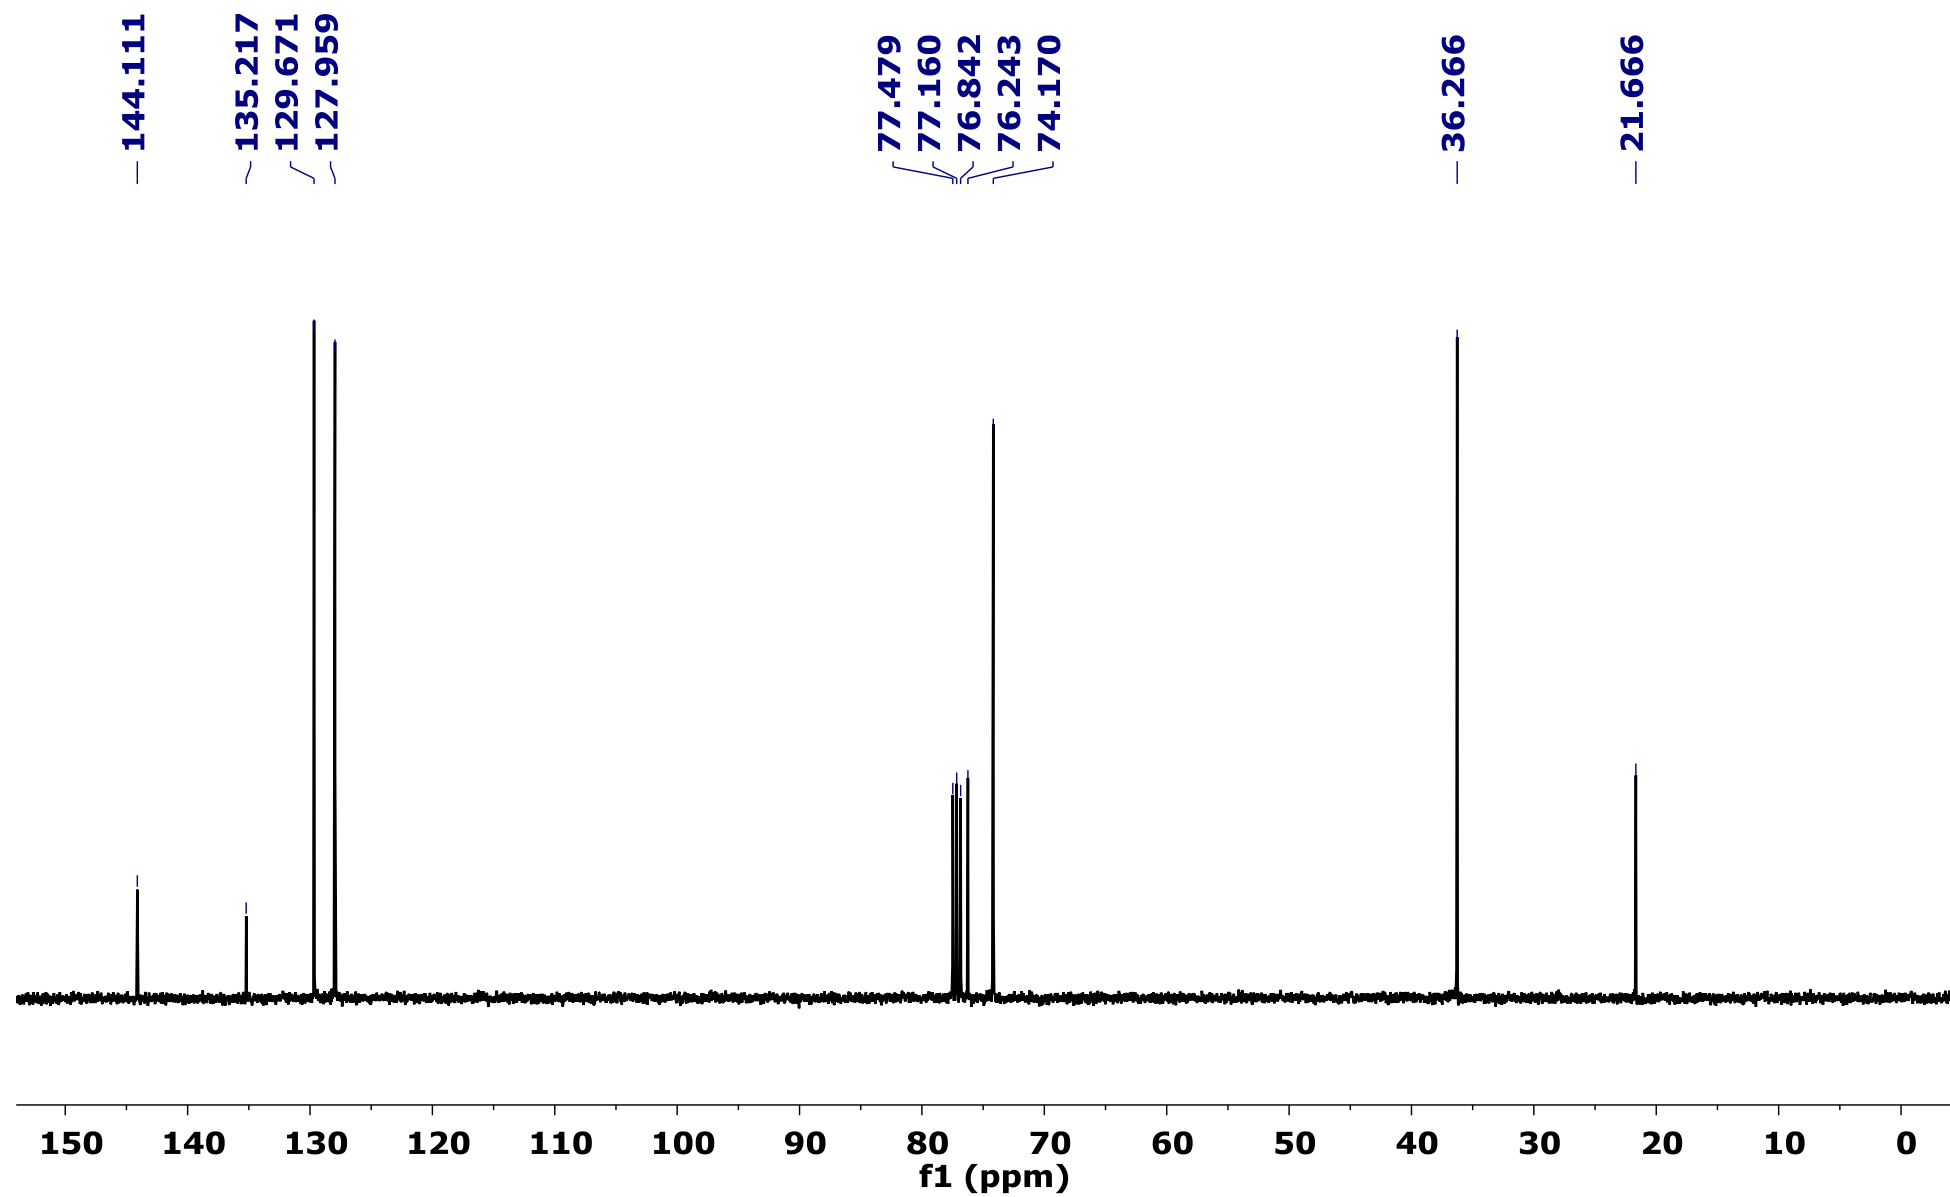

S21

Bisallene 1a

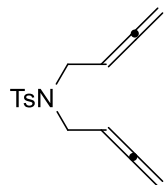

$^1\text{H}$  NMR (400 MHz,  $\text{CDCl}_3$ )

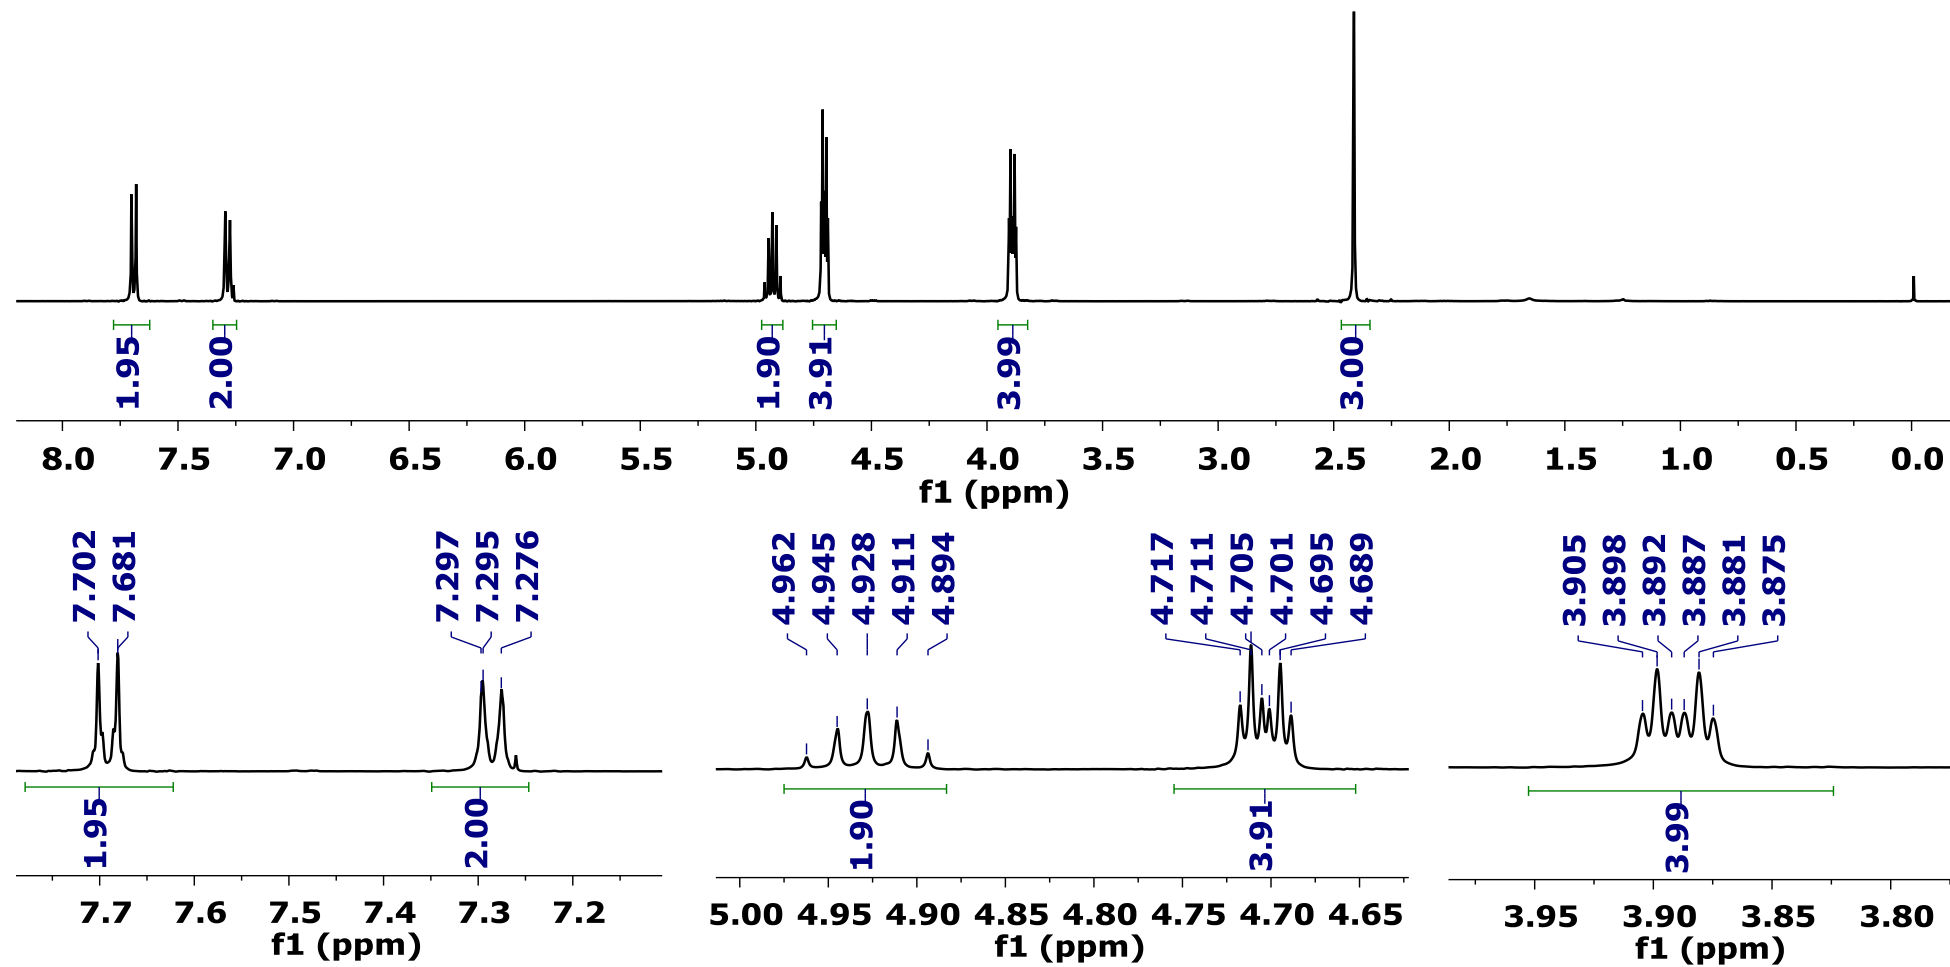

<sup>13</sup>C NMR (101 MHz, CDCl<sub>3</sub>)

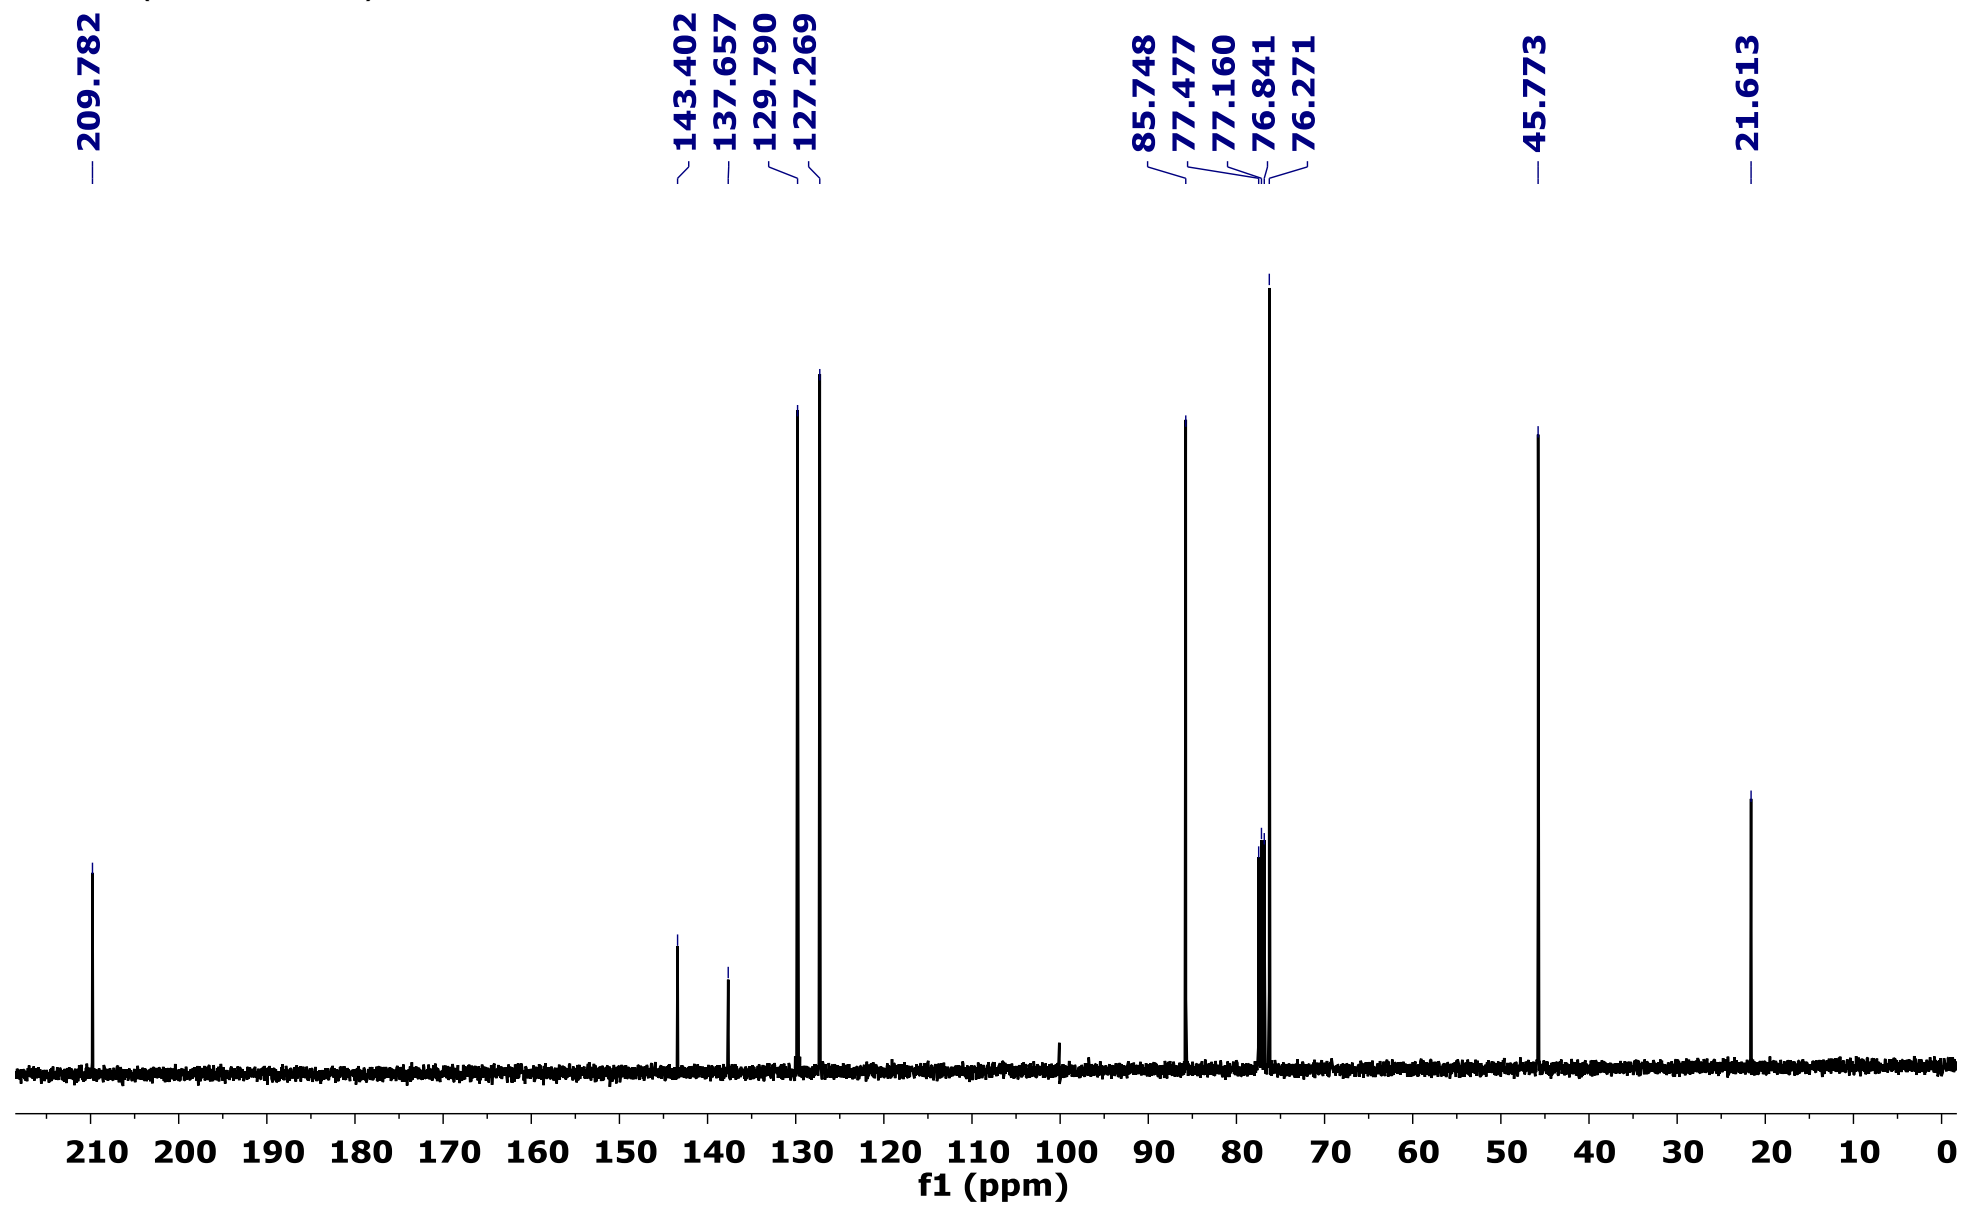

S23

Bisallene 1b

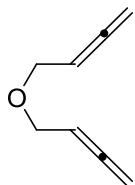

$^1\text{H}$  NMR (400 MHz,  $\text{CDCl}_3$ )

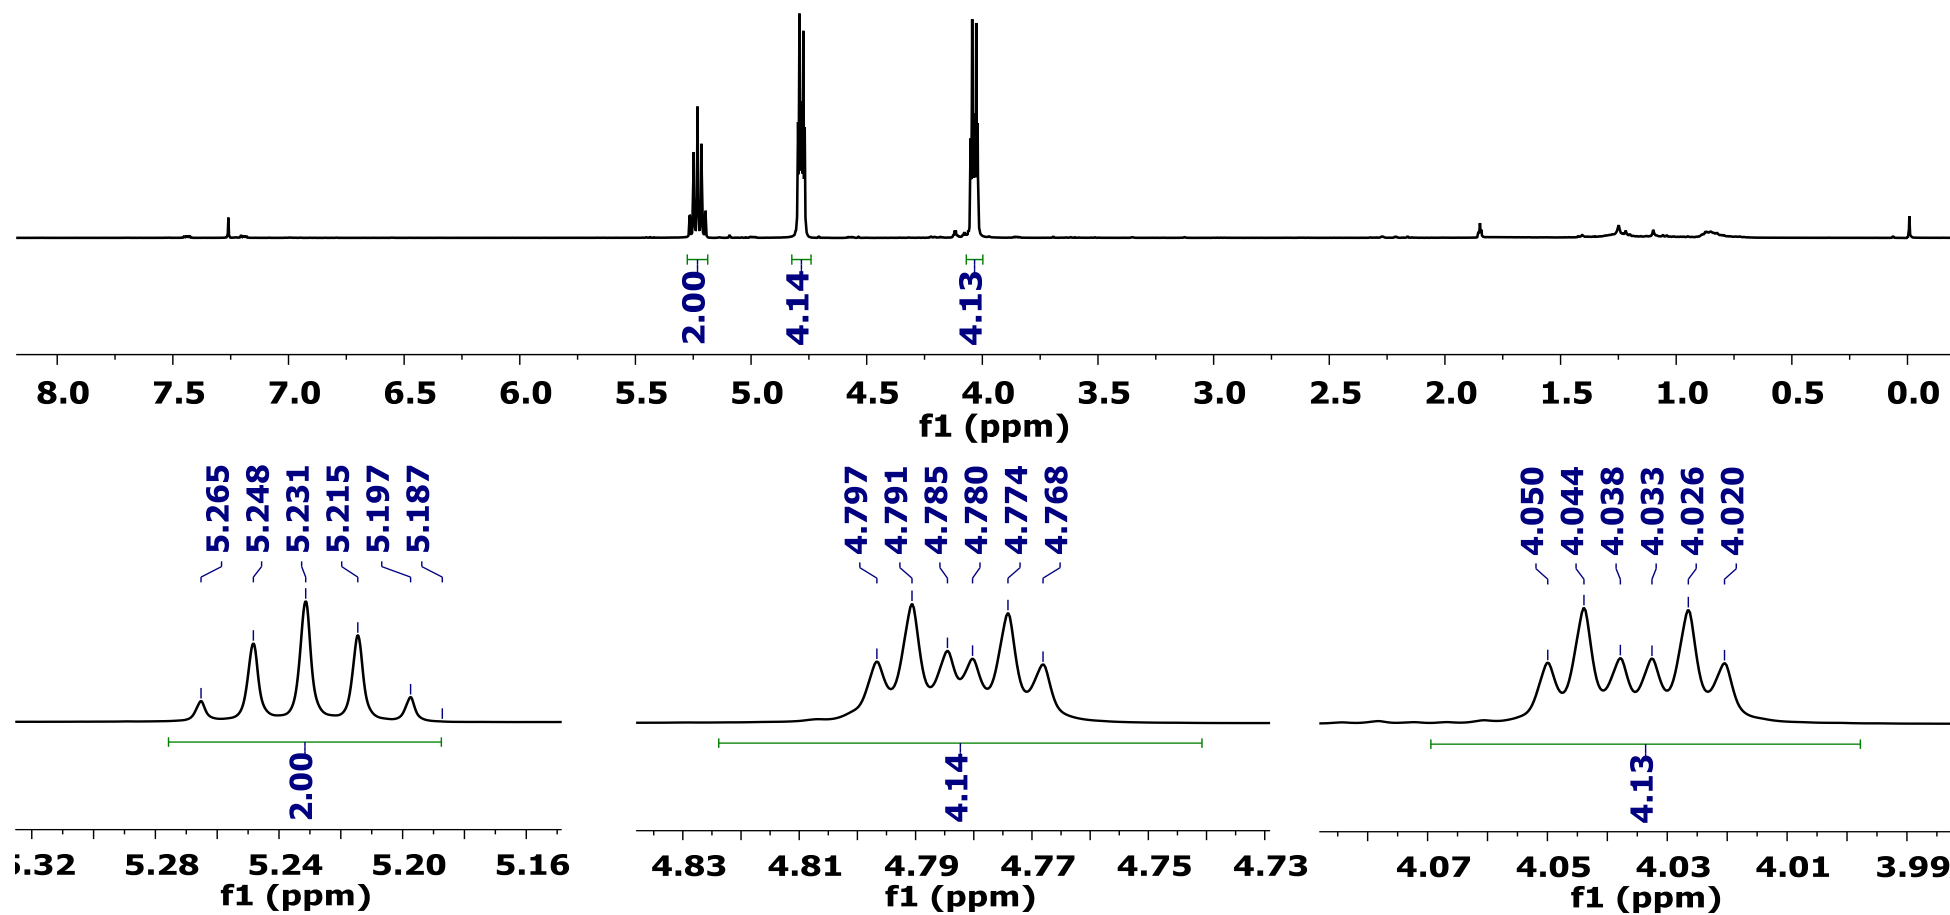

S24

<sup>13</sup>C NMR (101 MHz, CDCl<sub>3</sub>)

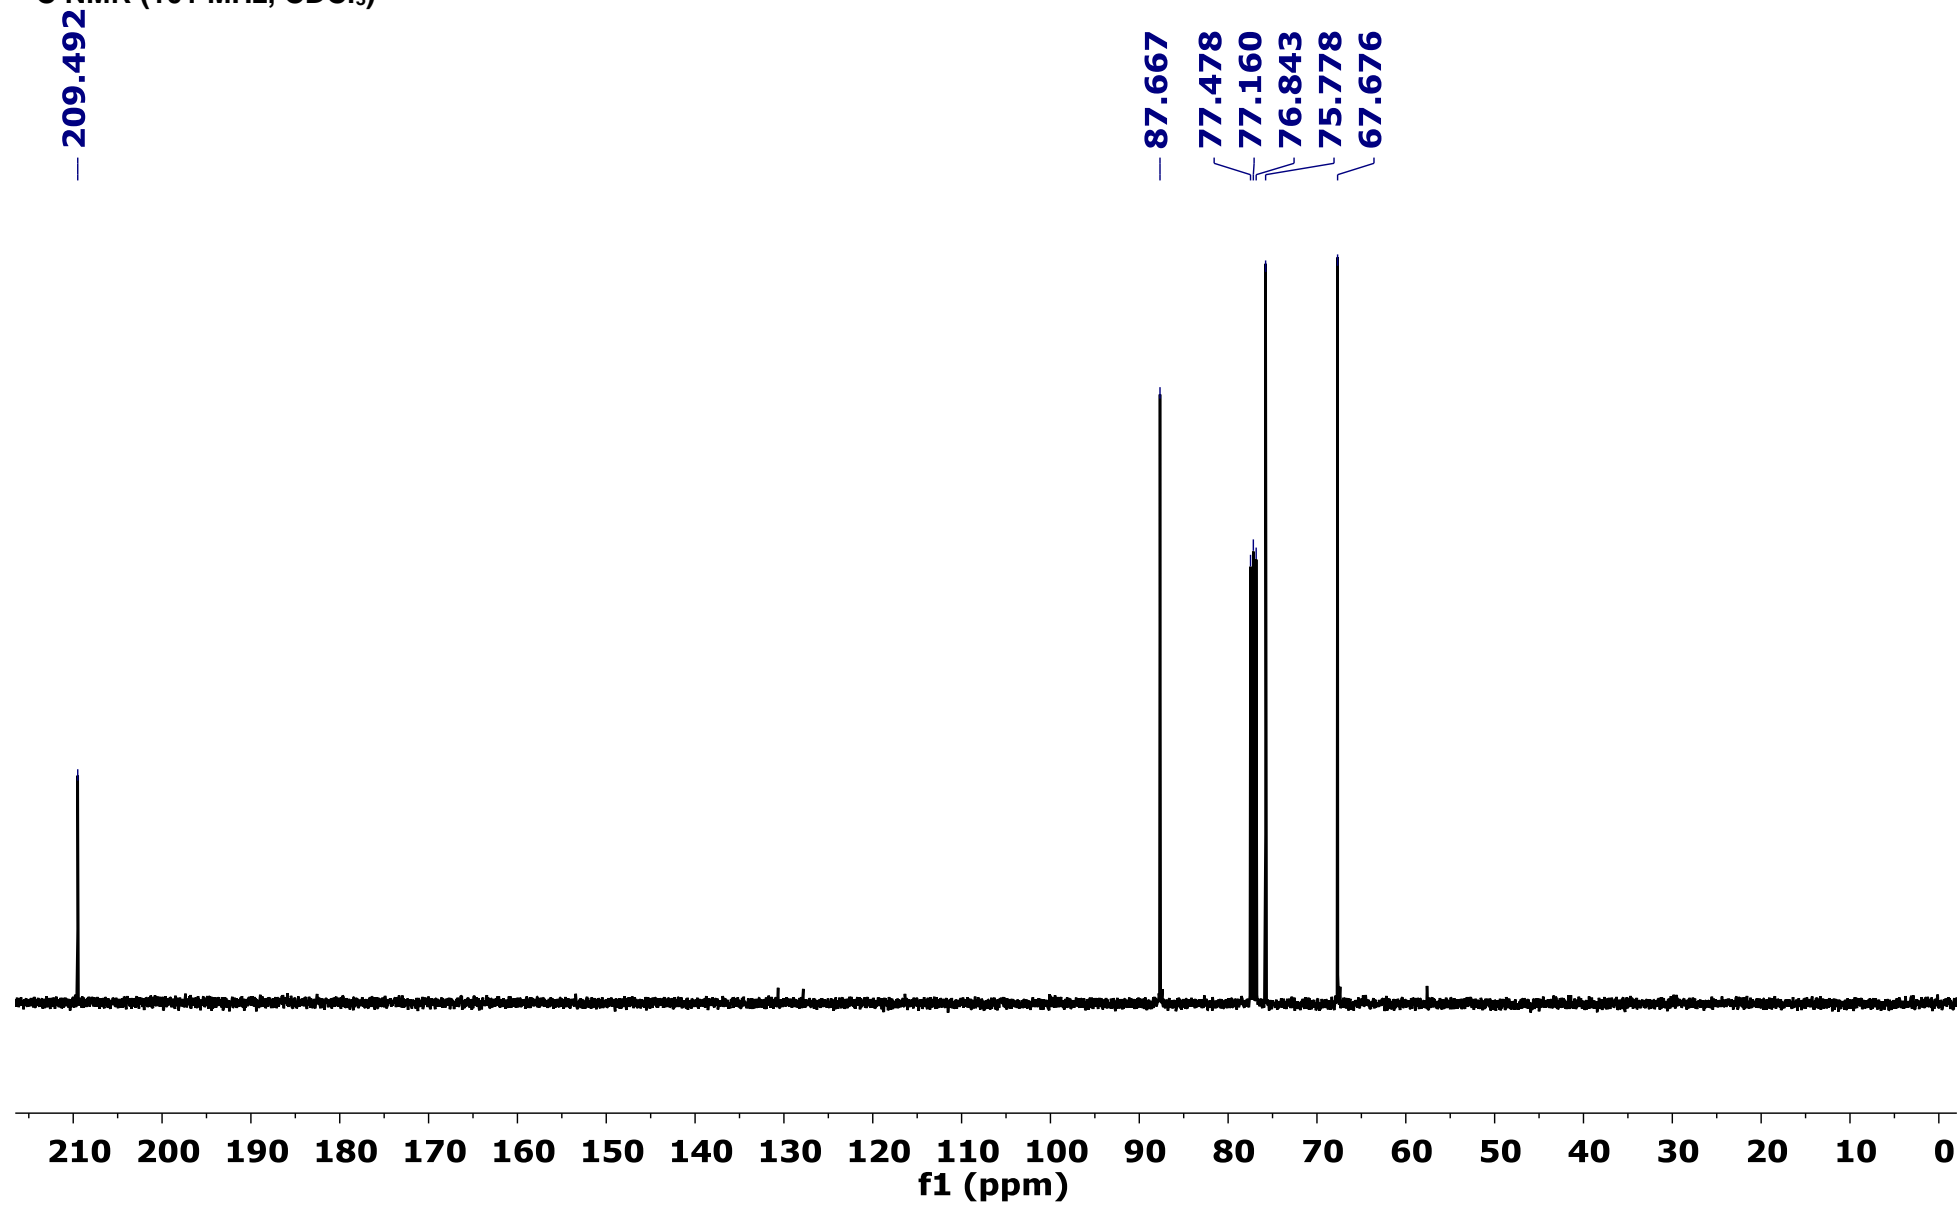

Product 3aa

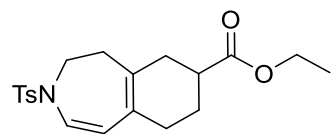

$^1\text{H}$  NMR (400 MHz,  $\text{CDCl}_3$ )

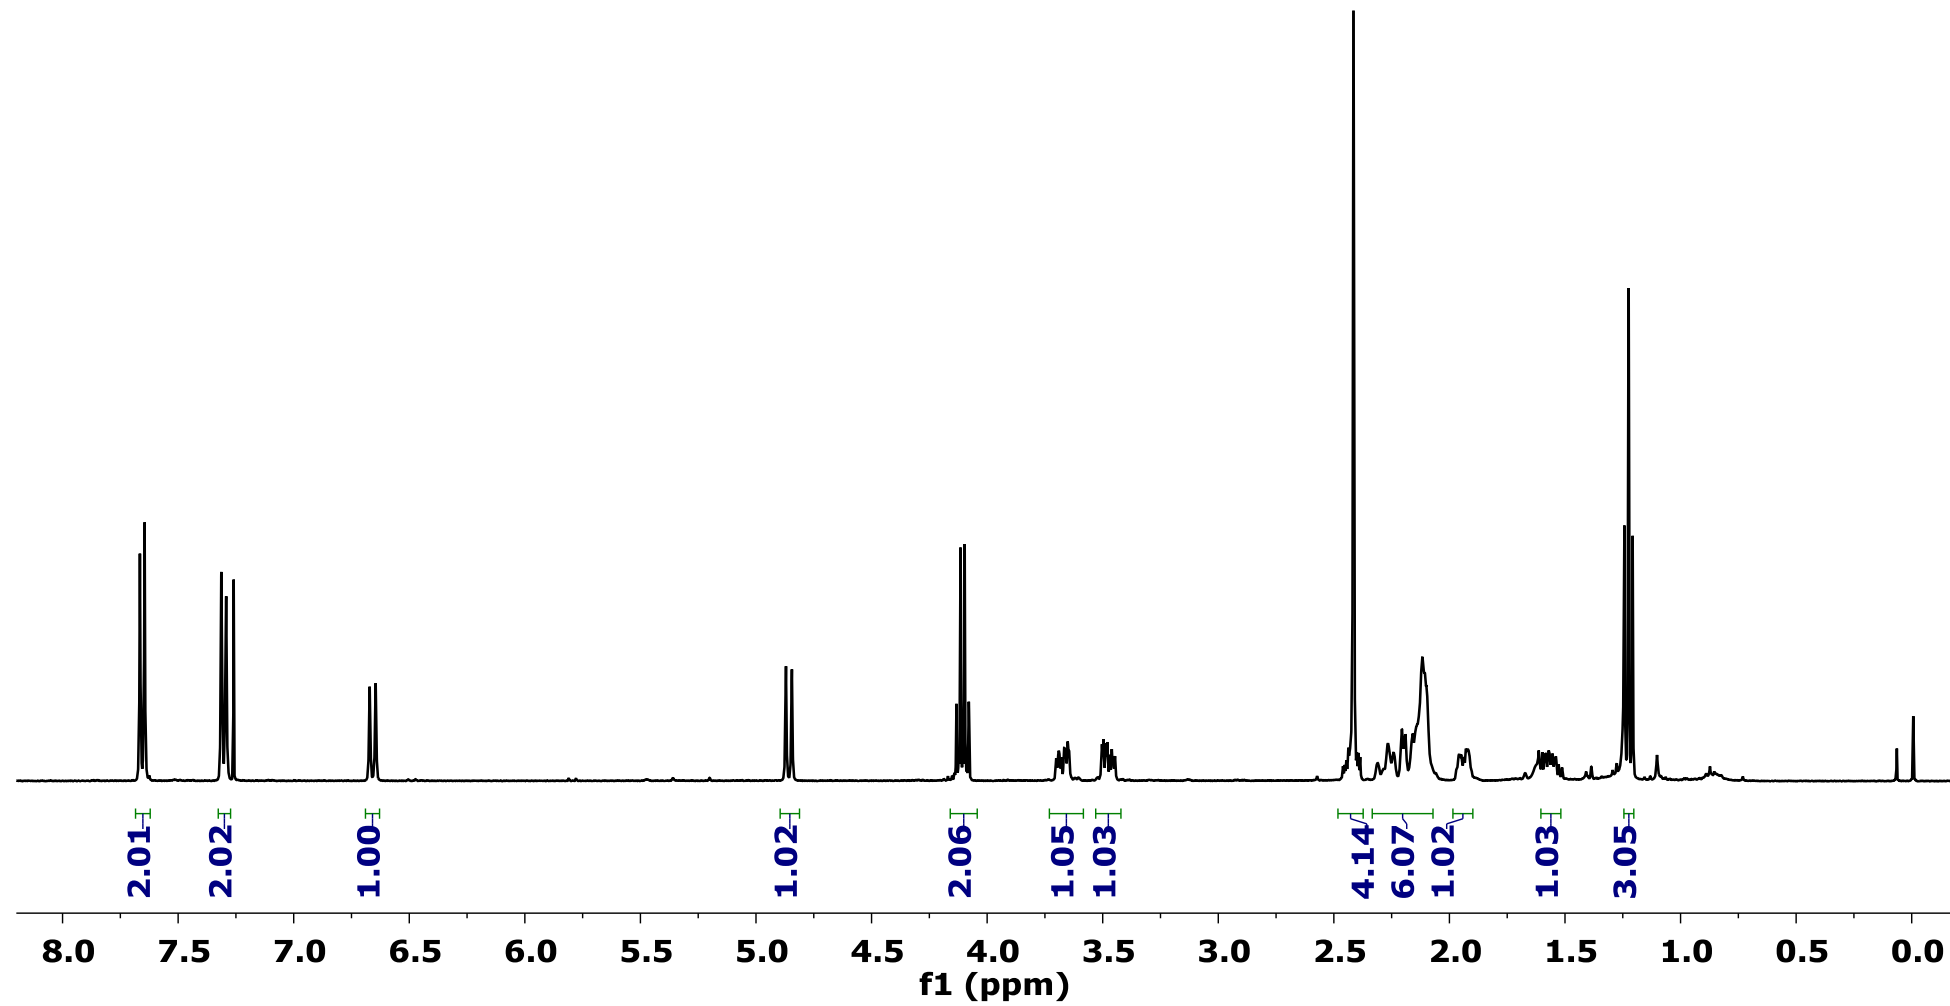

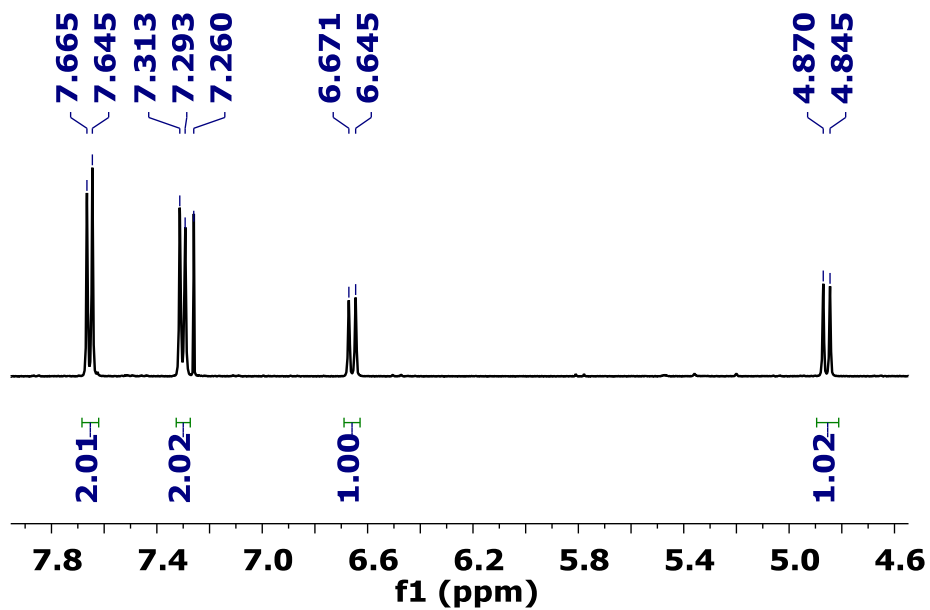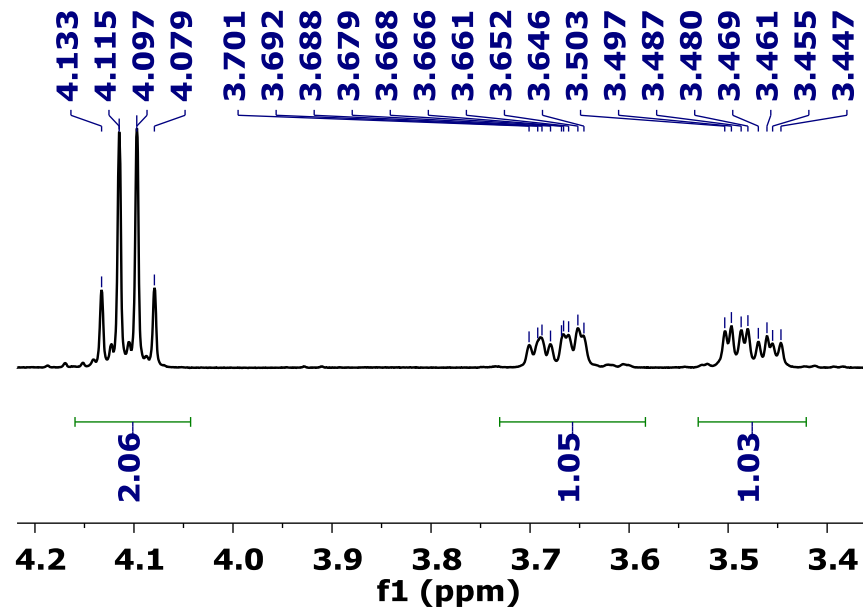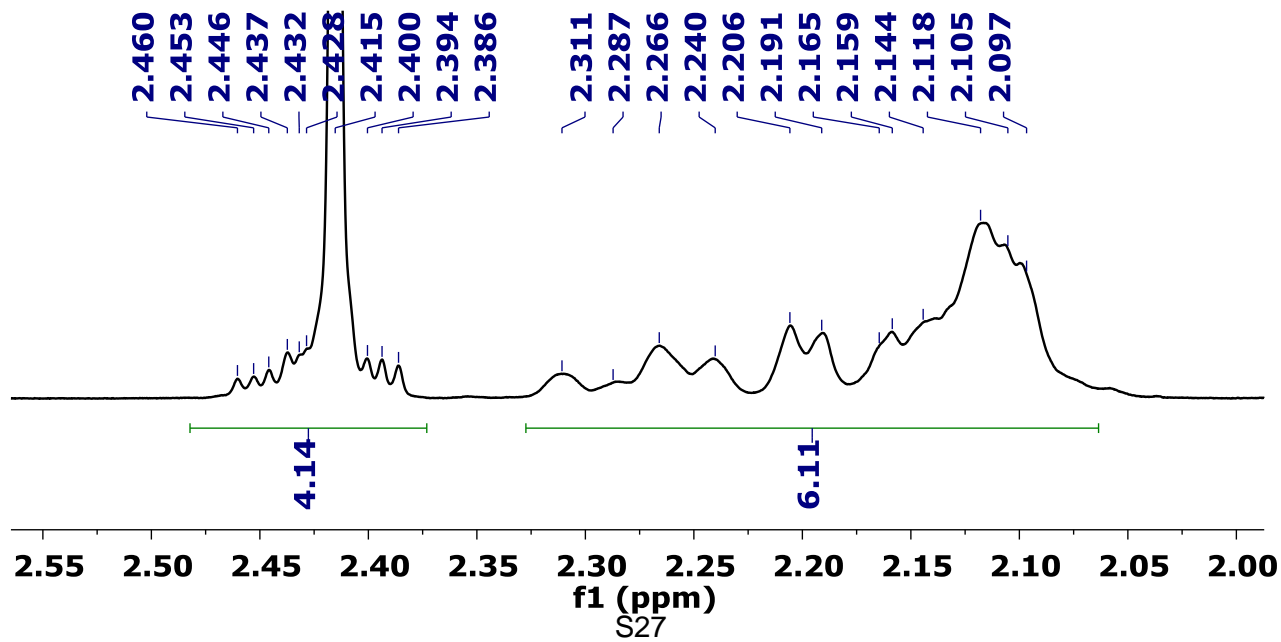

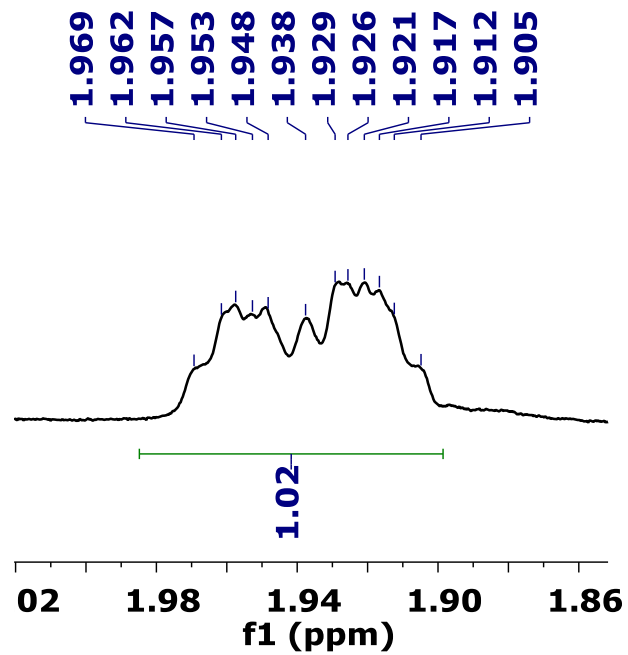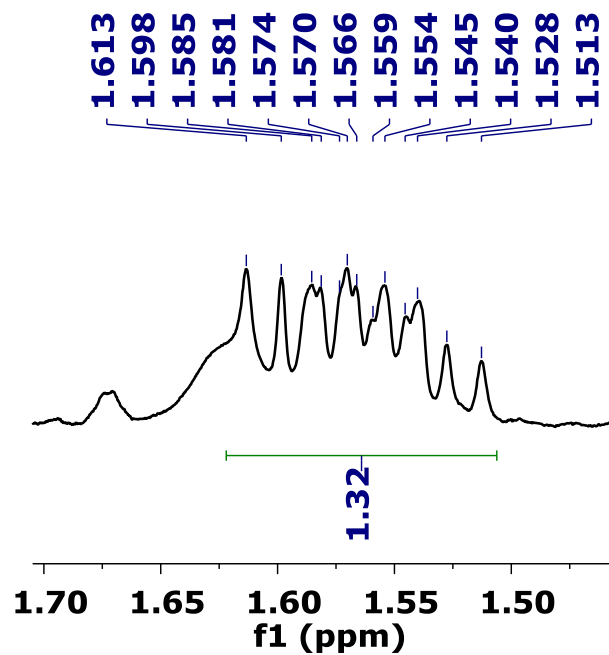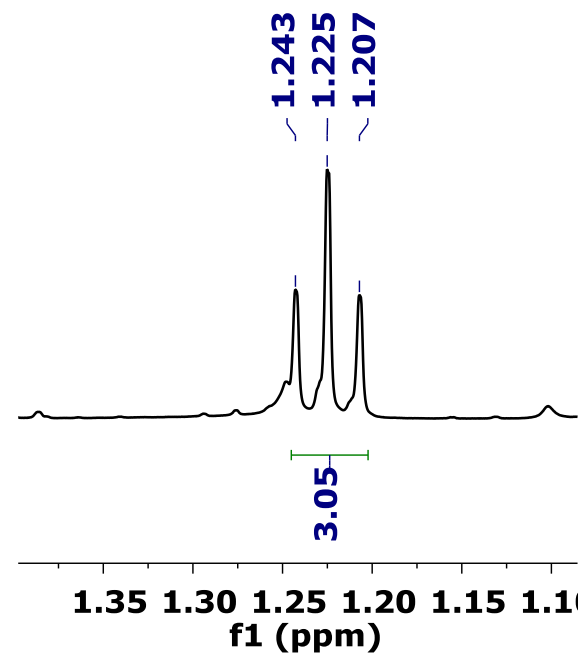



<sup>13</sup>C NMR (101 MHz, CDCl<sub>3</sub>)

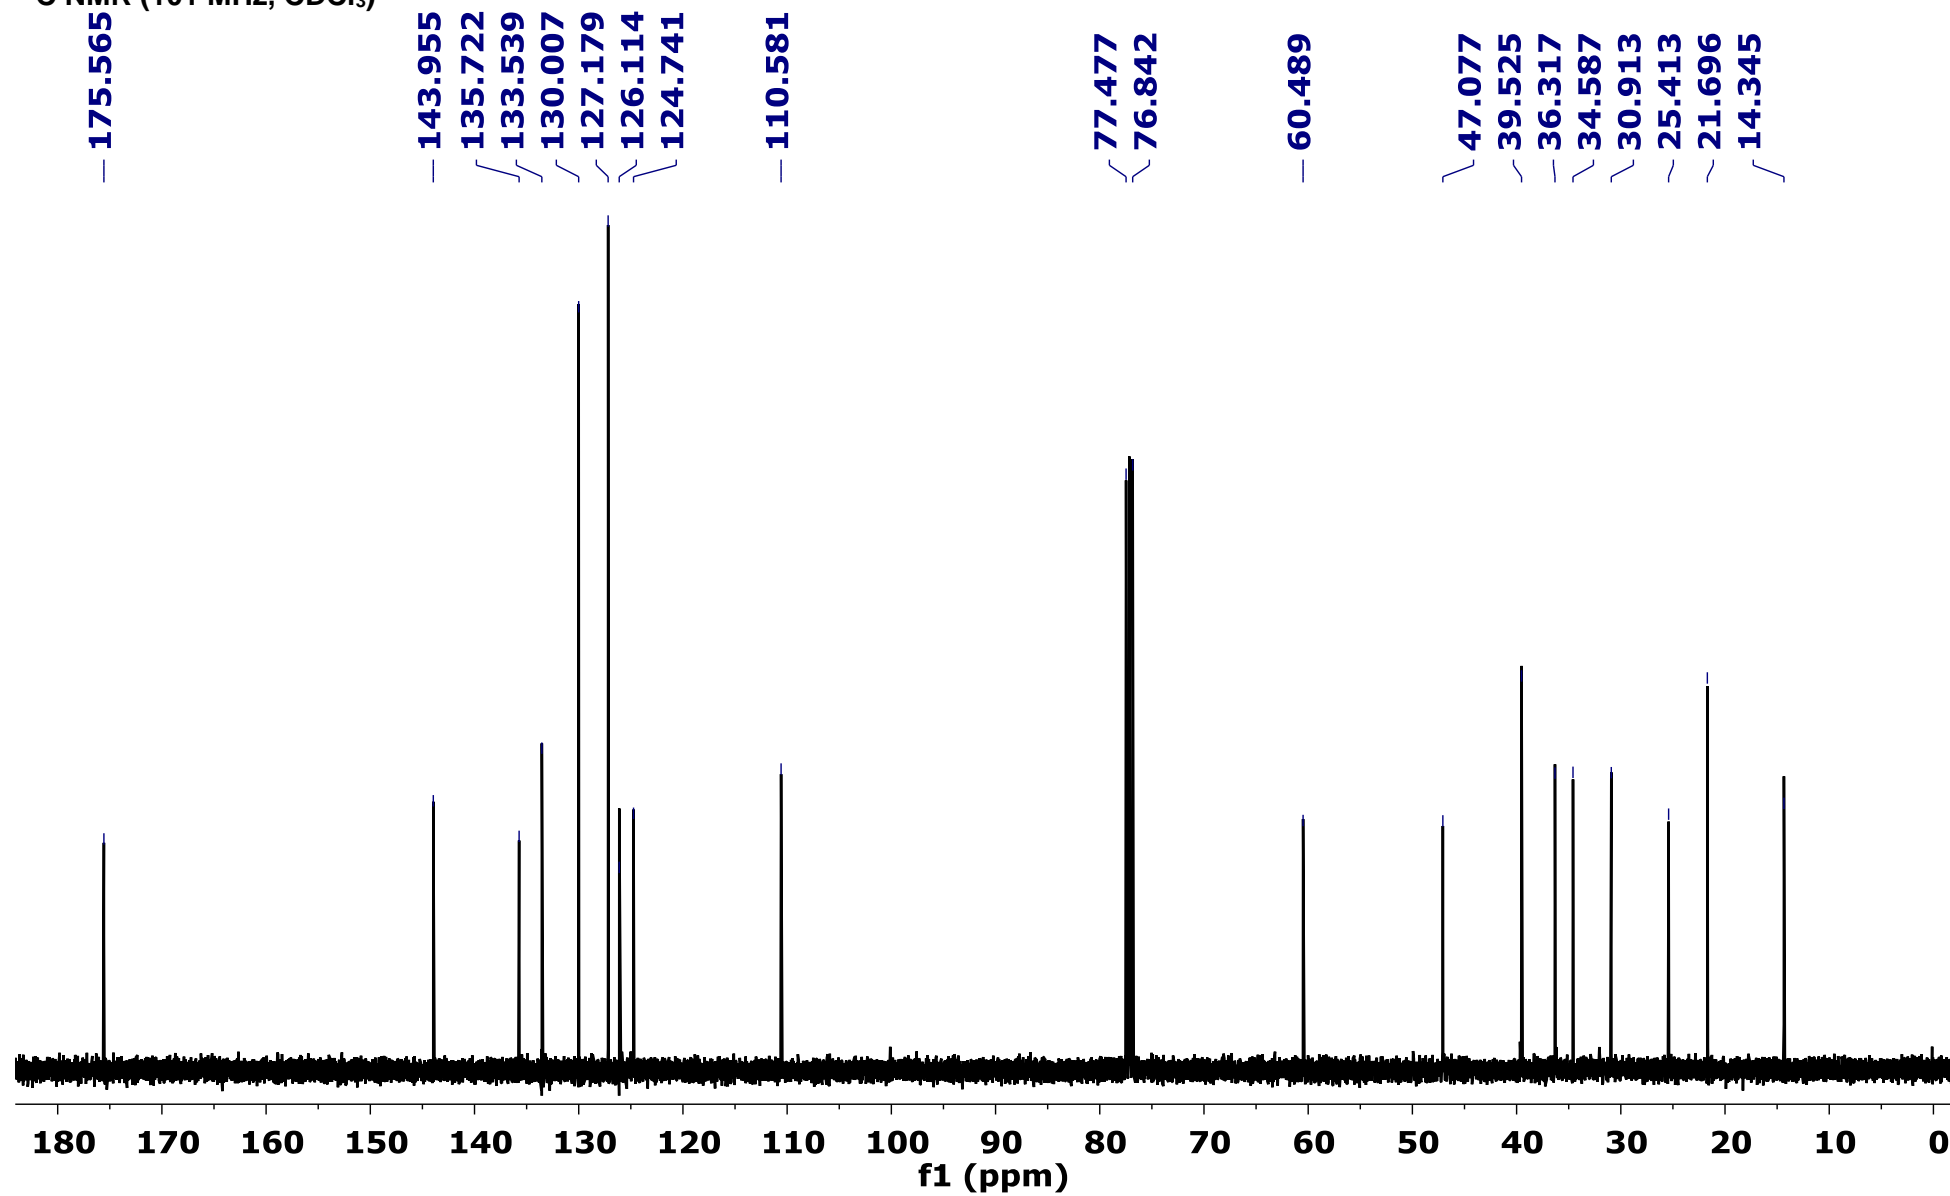

# 2D NMR HSQC

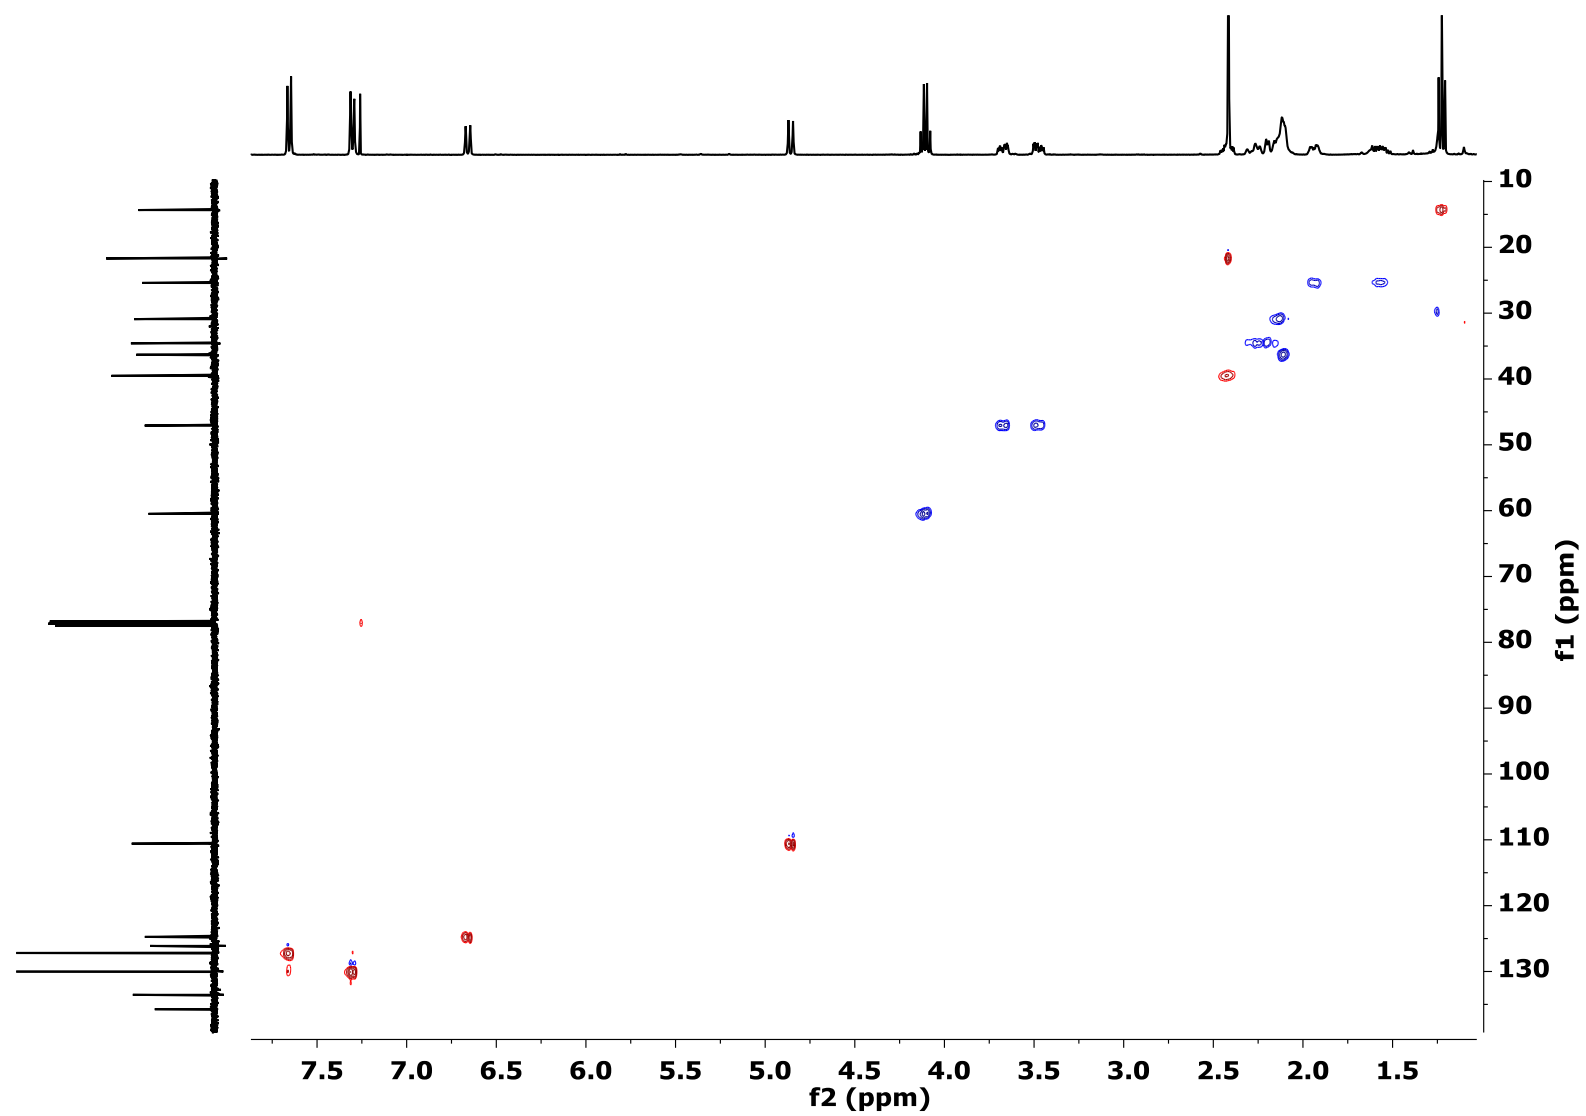

# 2D NMR HMBC

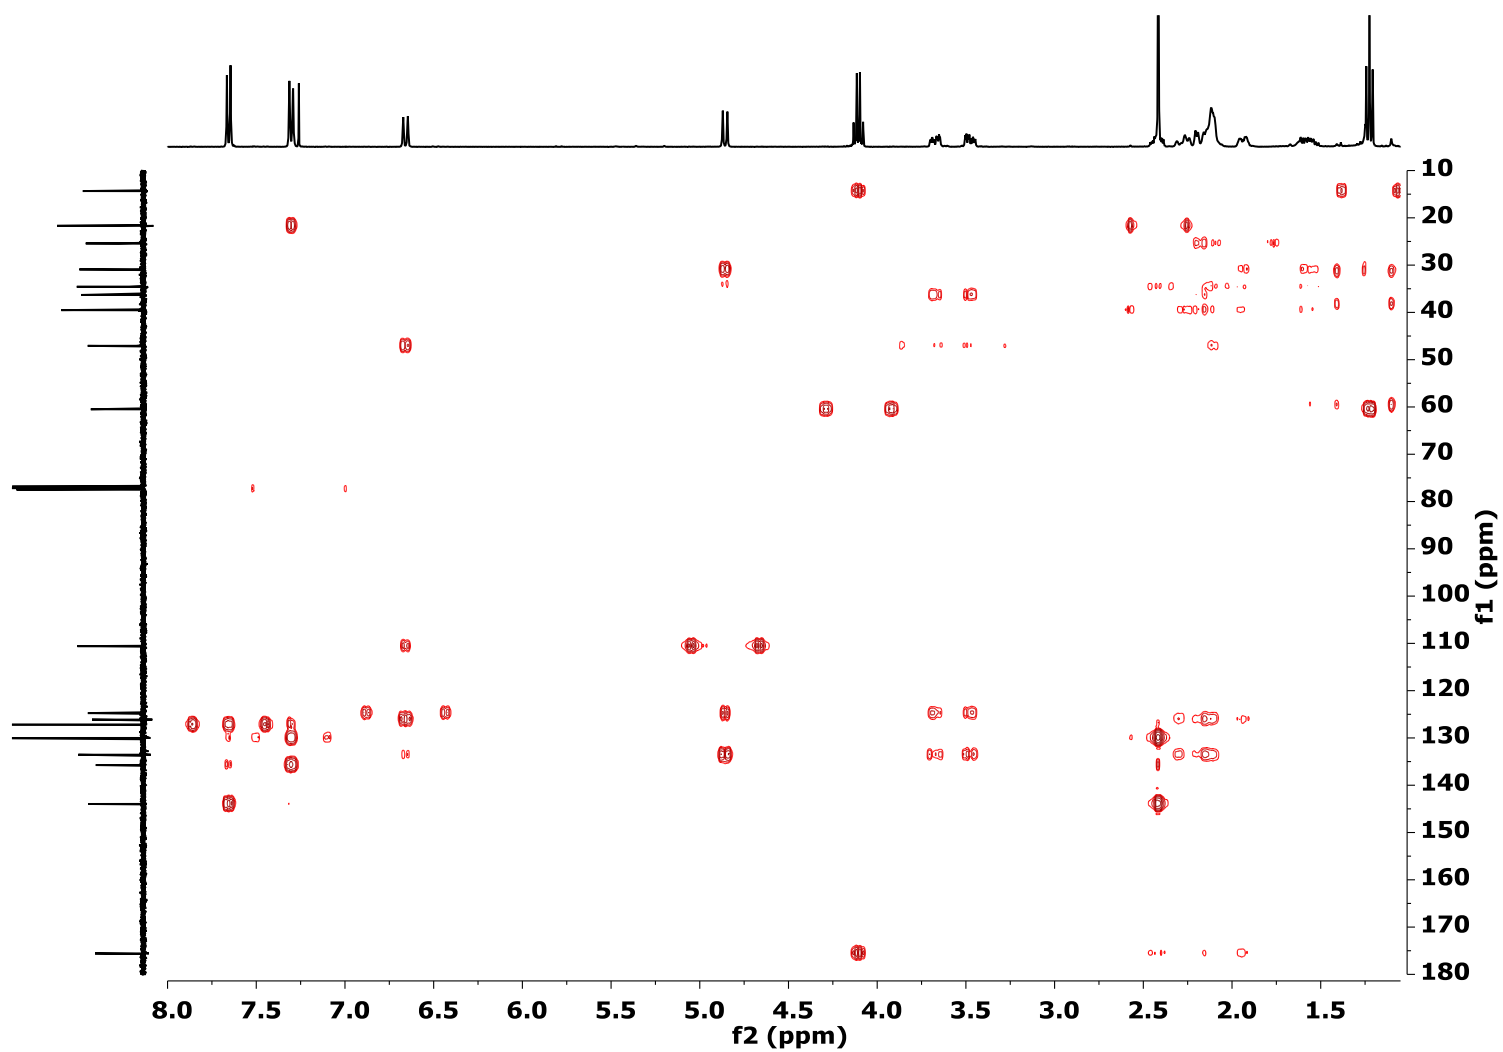

# 2D NMR COSY

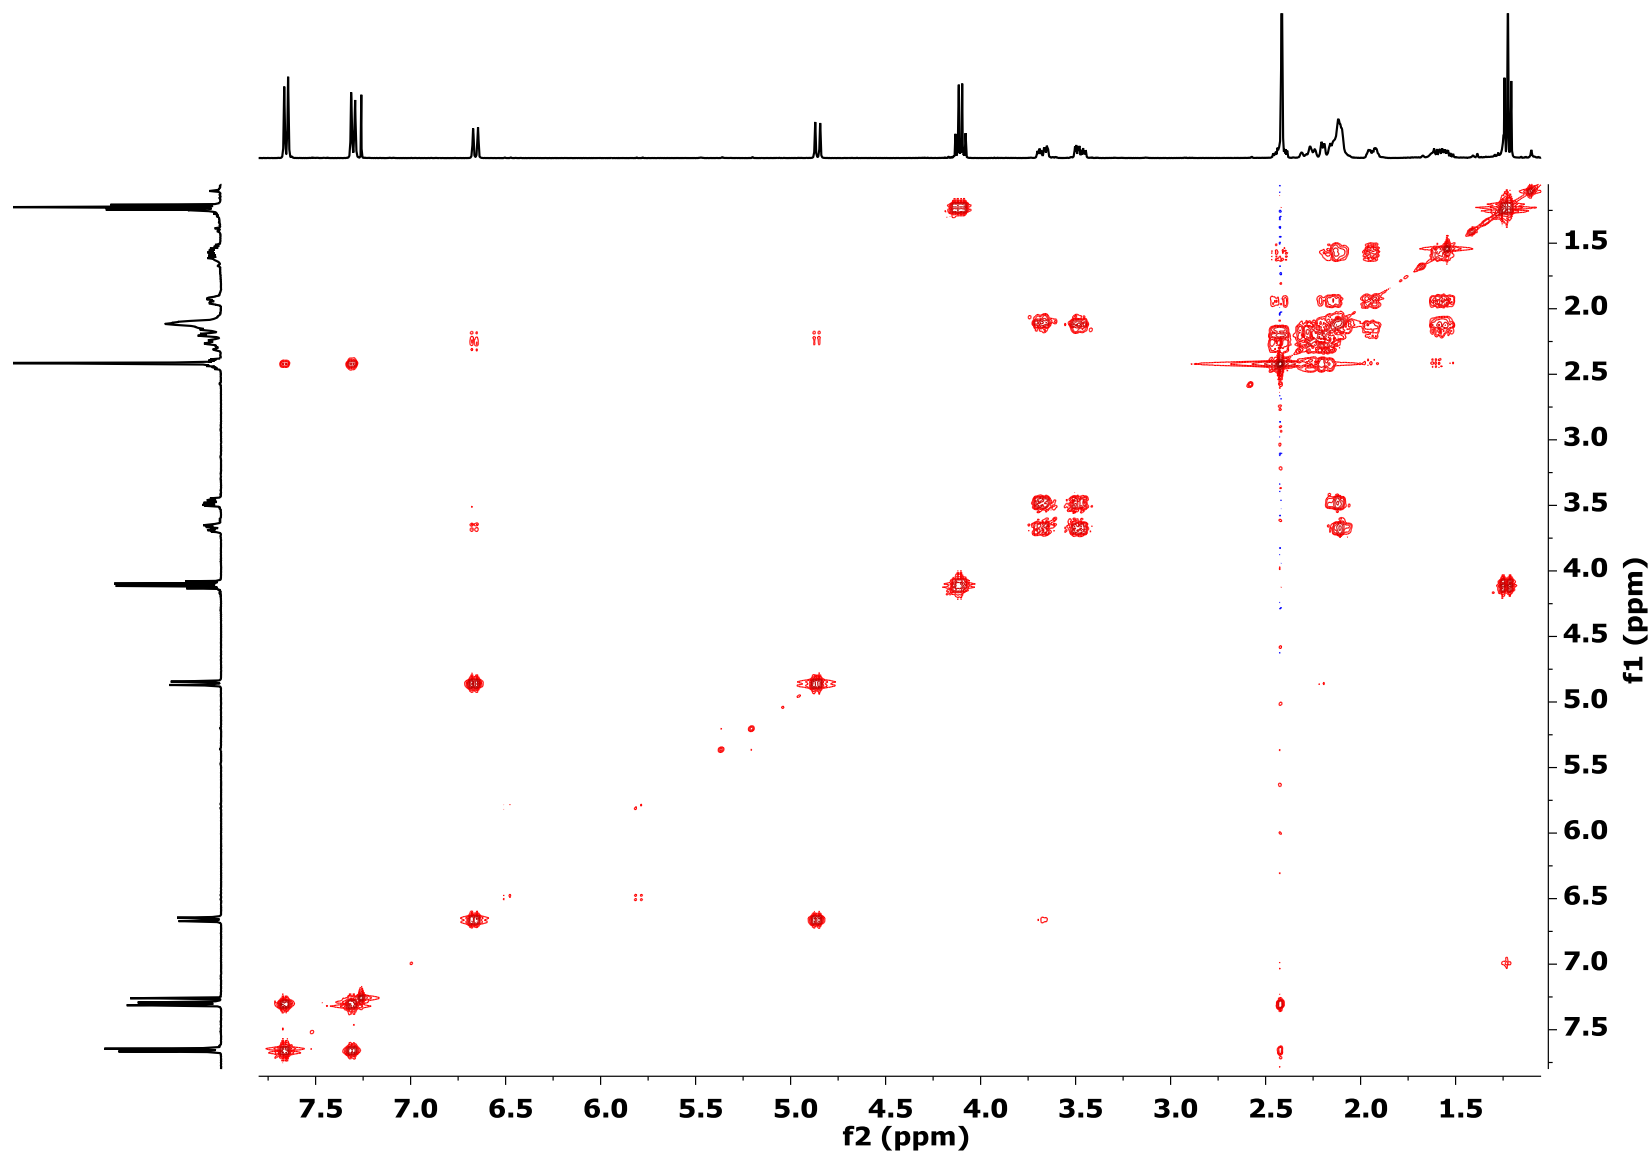

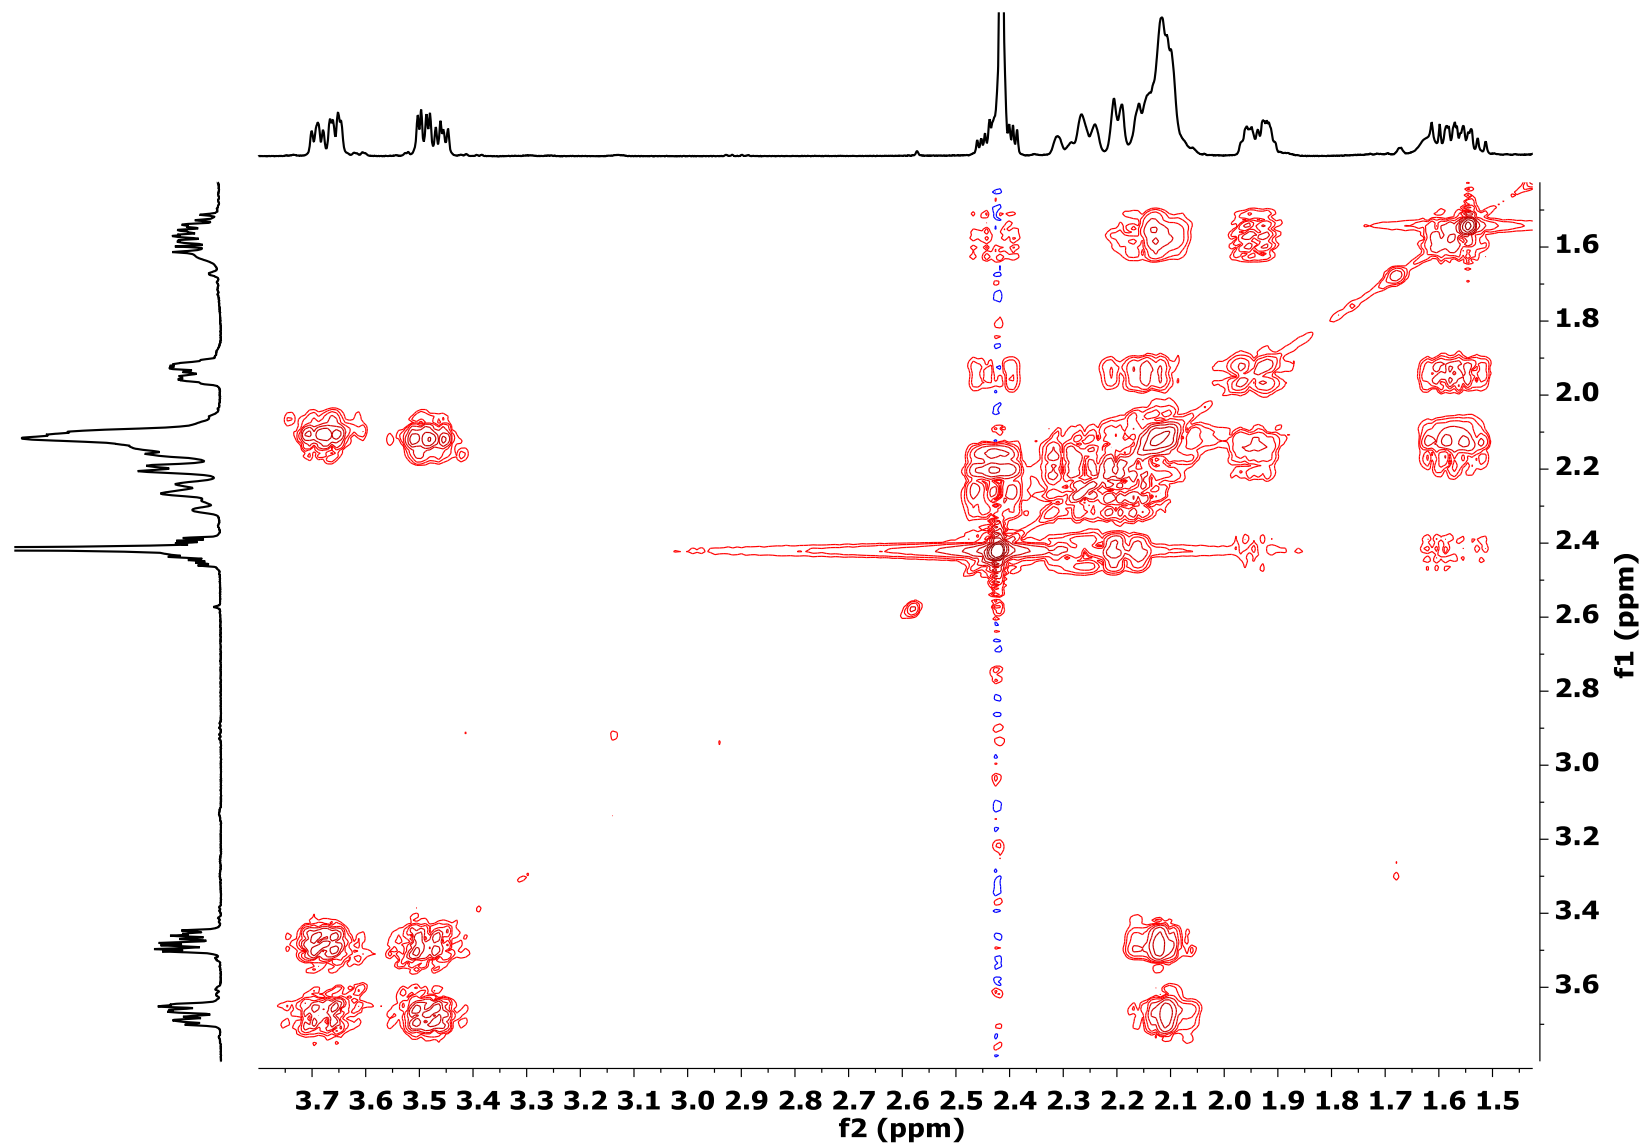

# 2D NMR NOESY

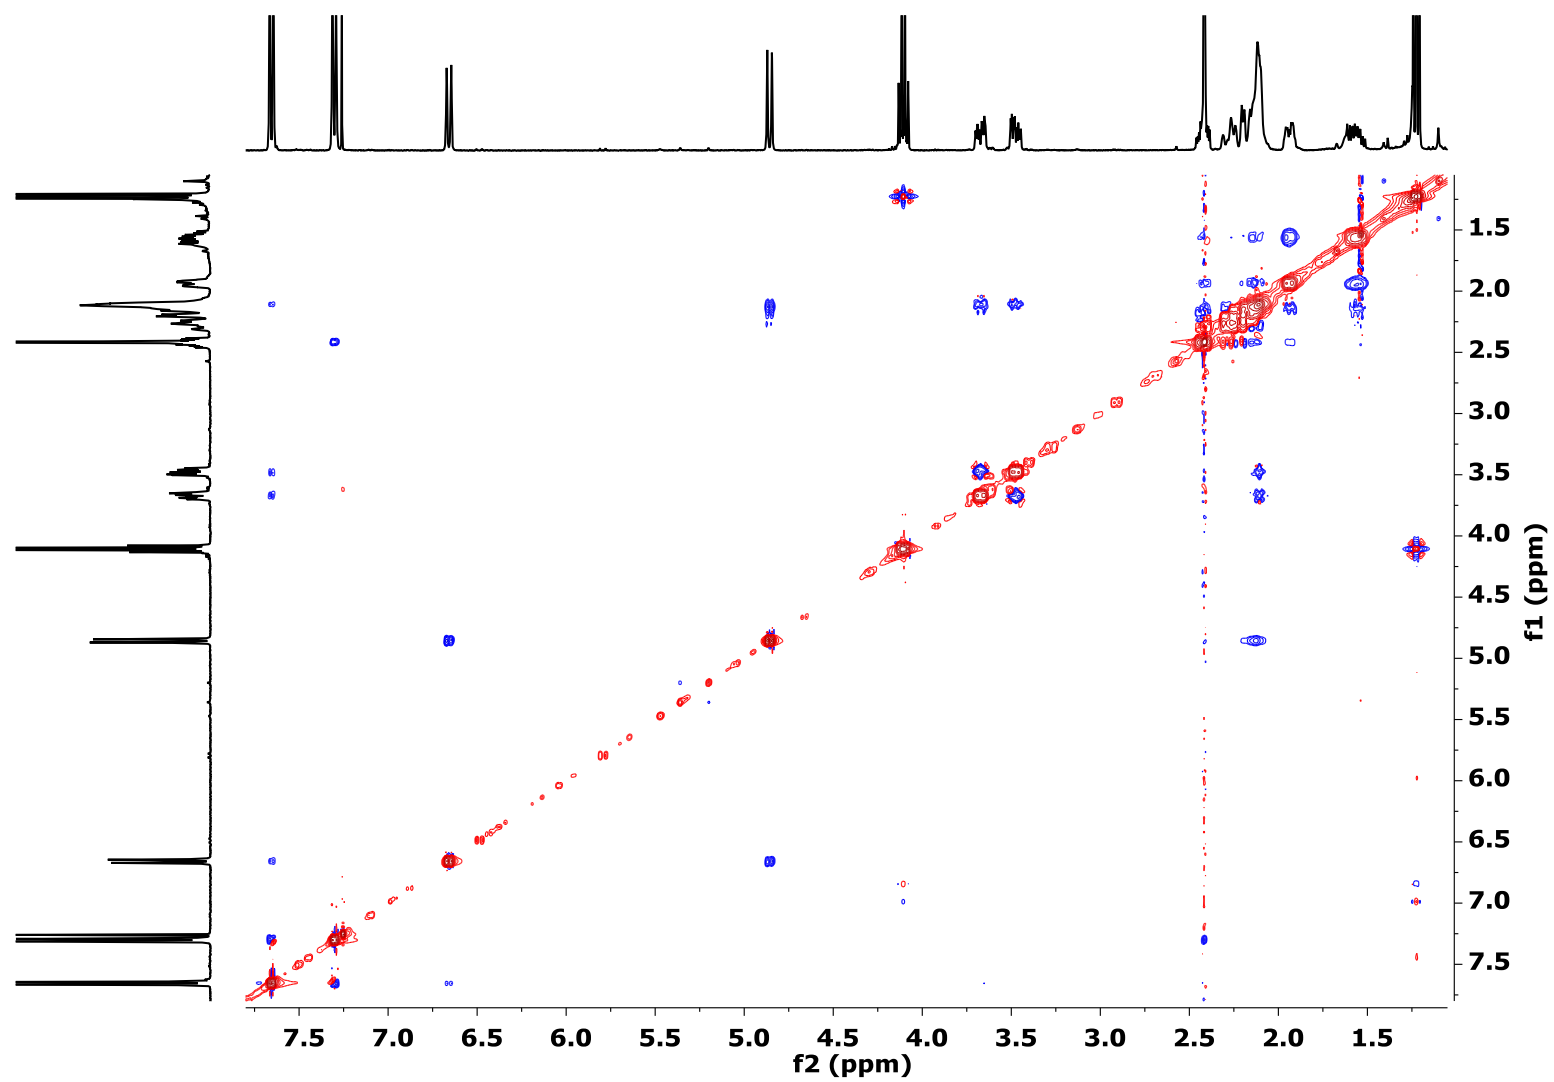

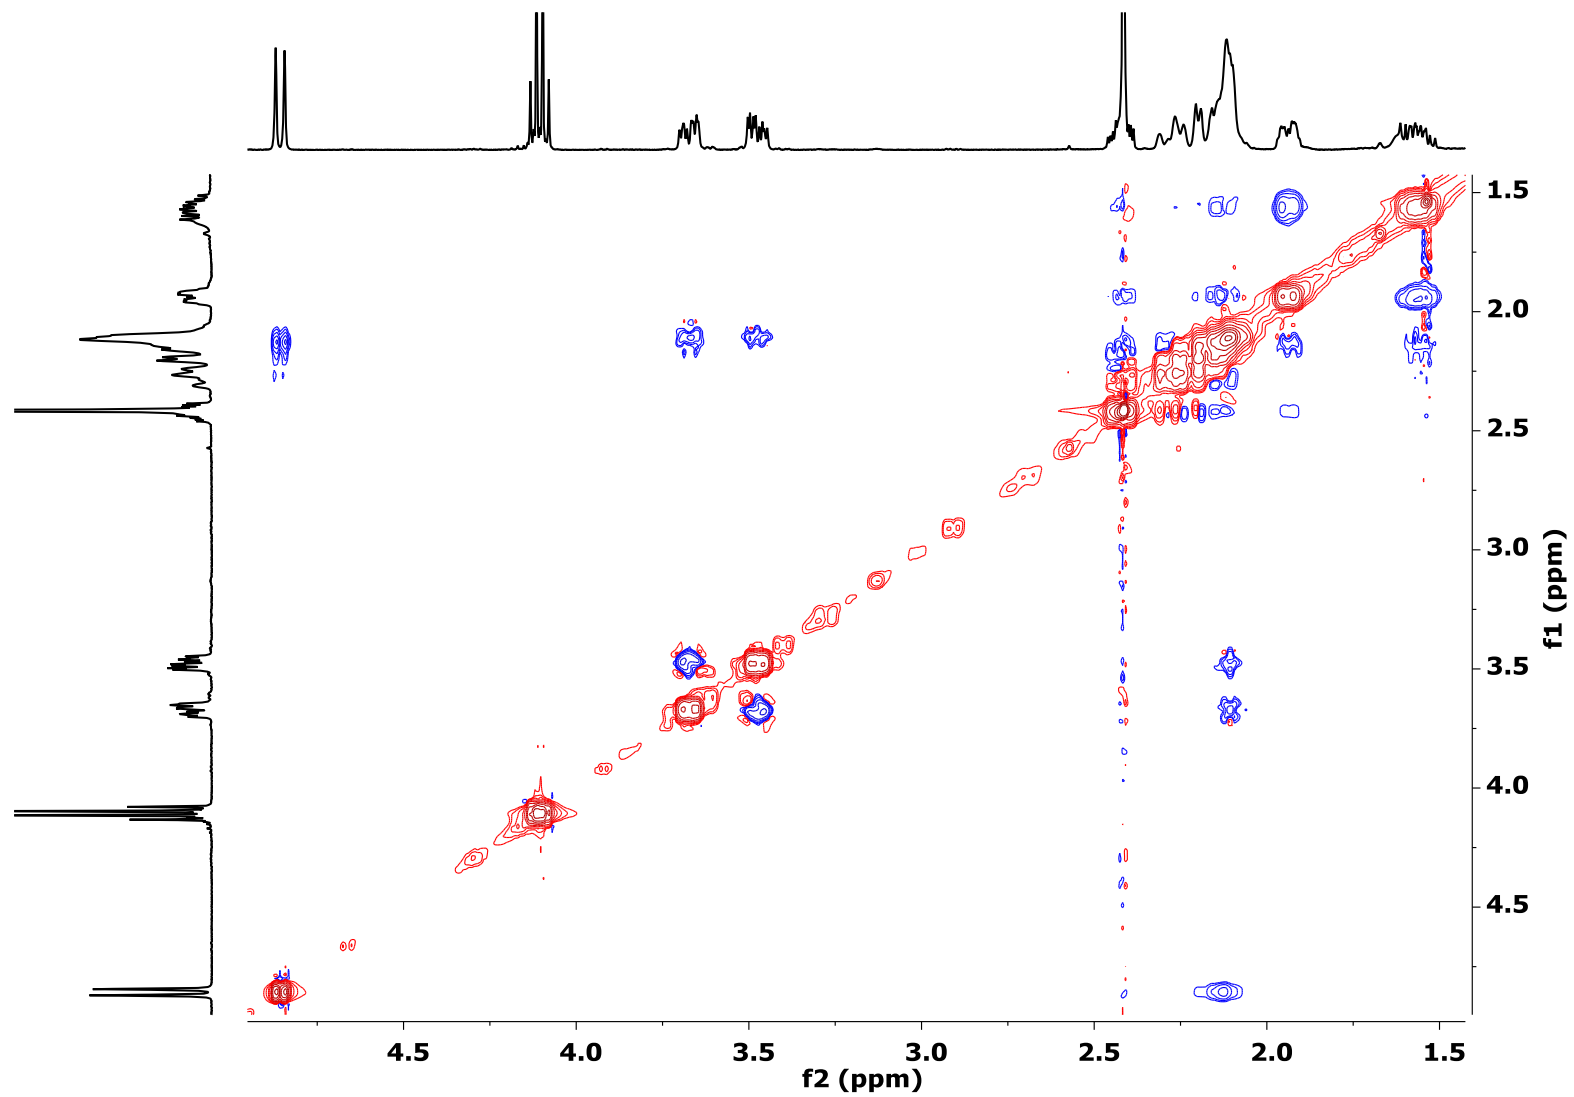

1D NMR SELECTIVE NOESY

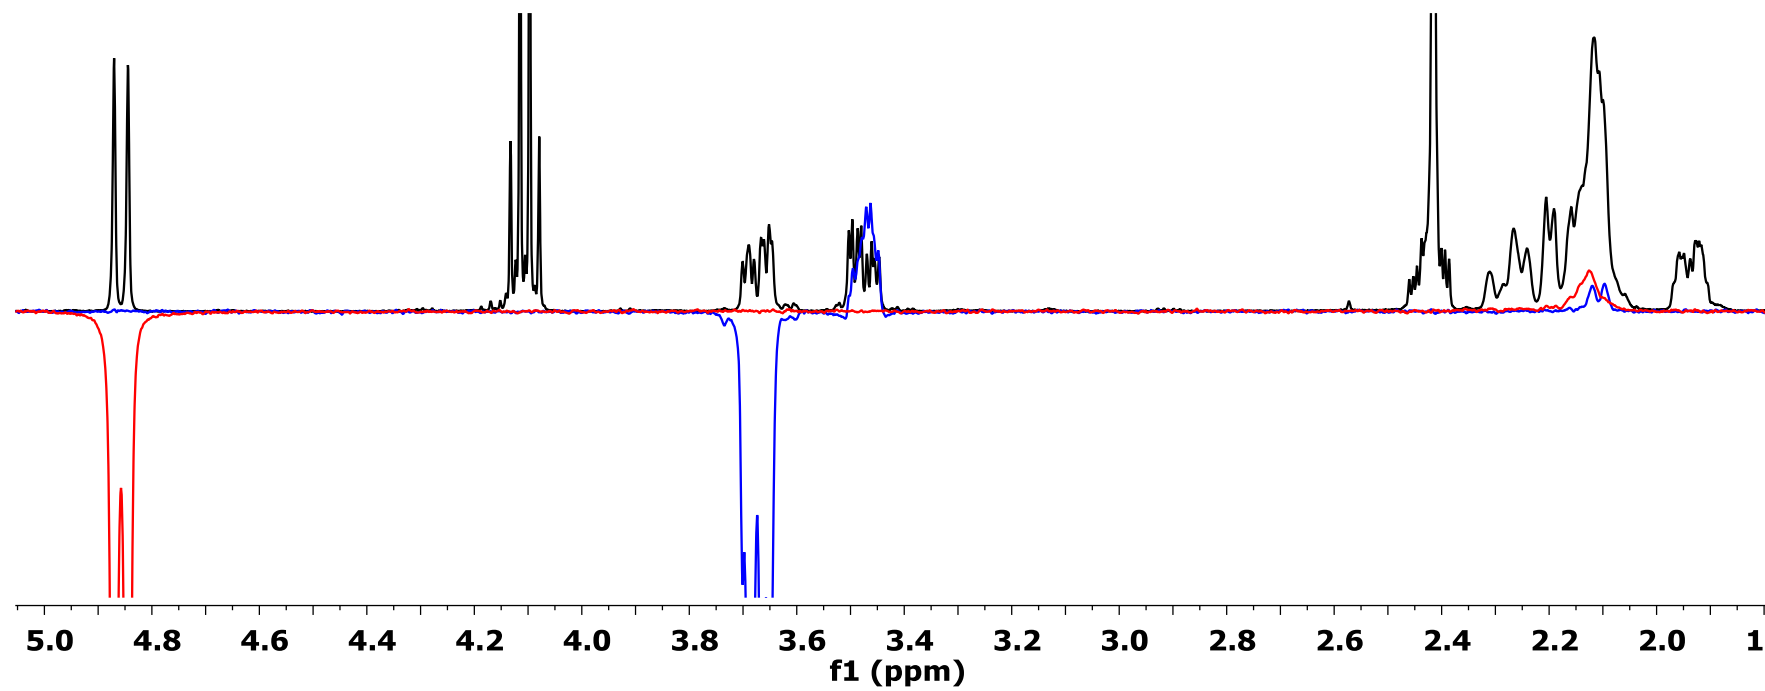



Product 3ab

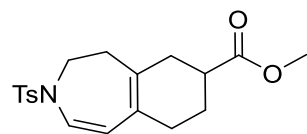

$^1\text{H}$  NMR (400 MHz,  $\text{CDCl}_3$ )

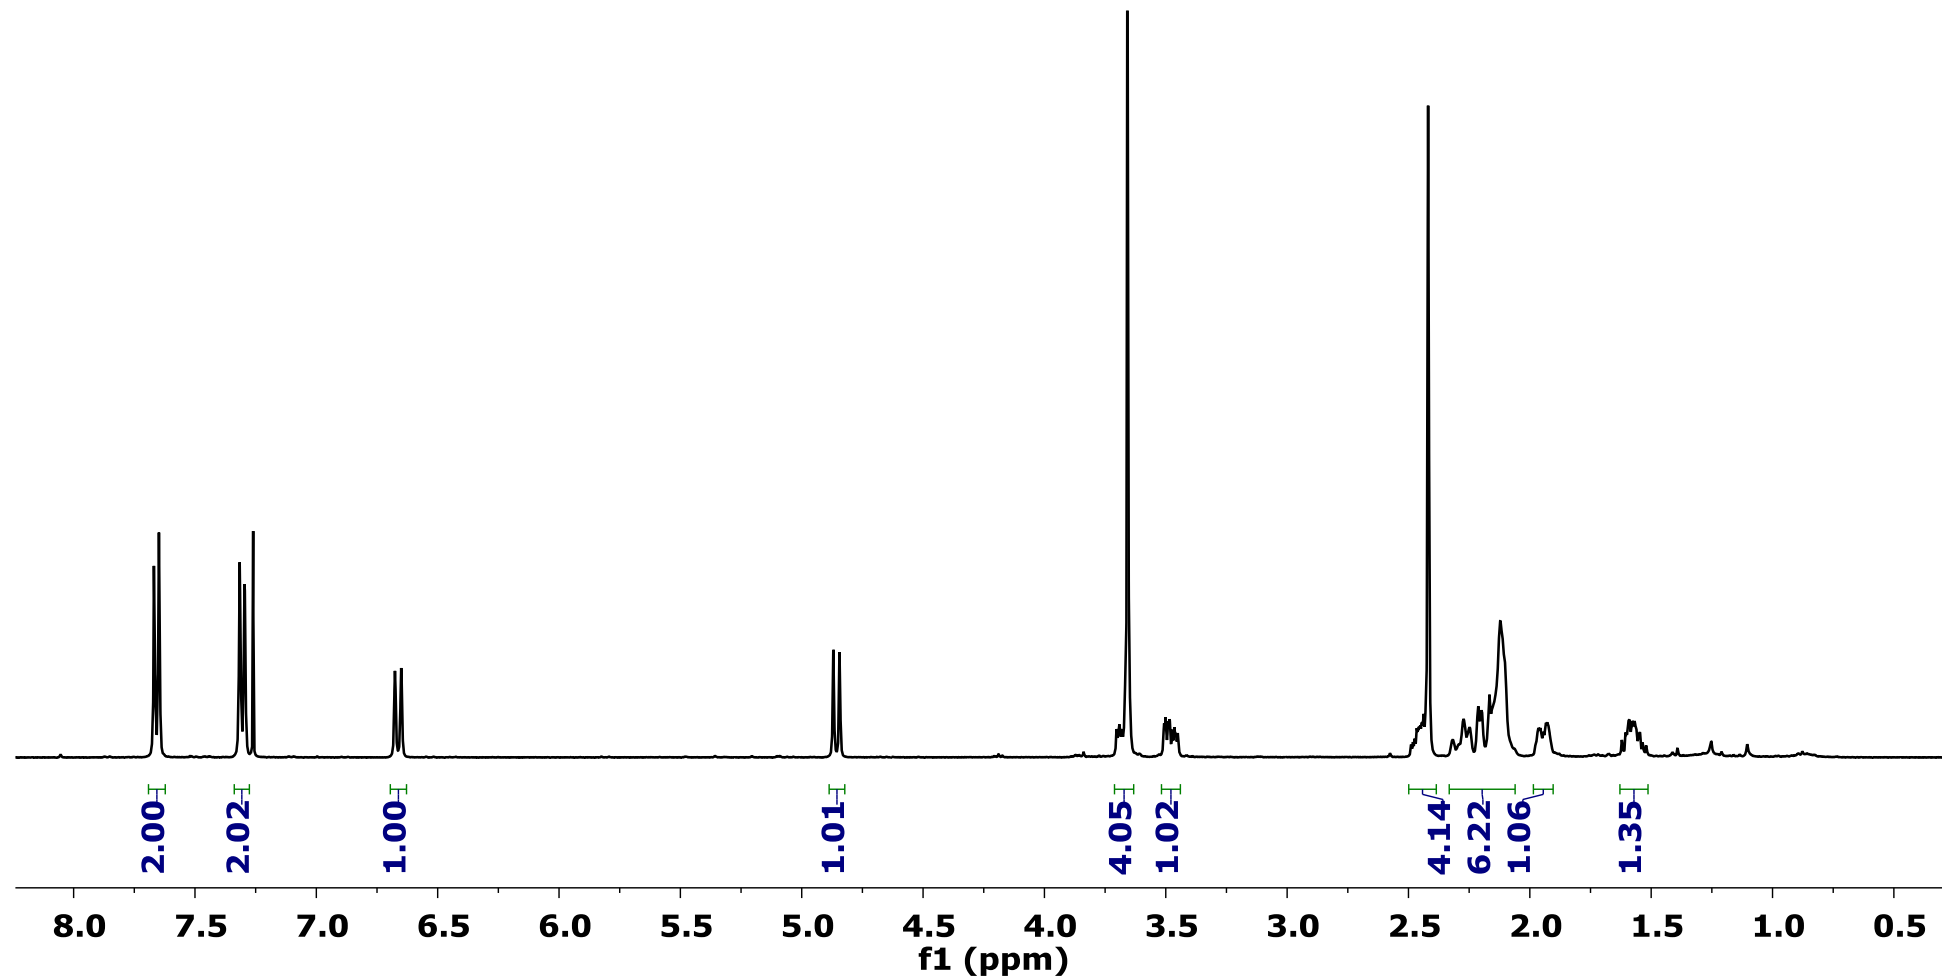

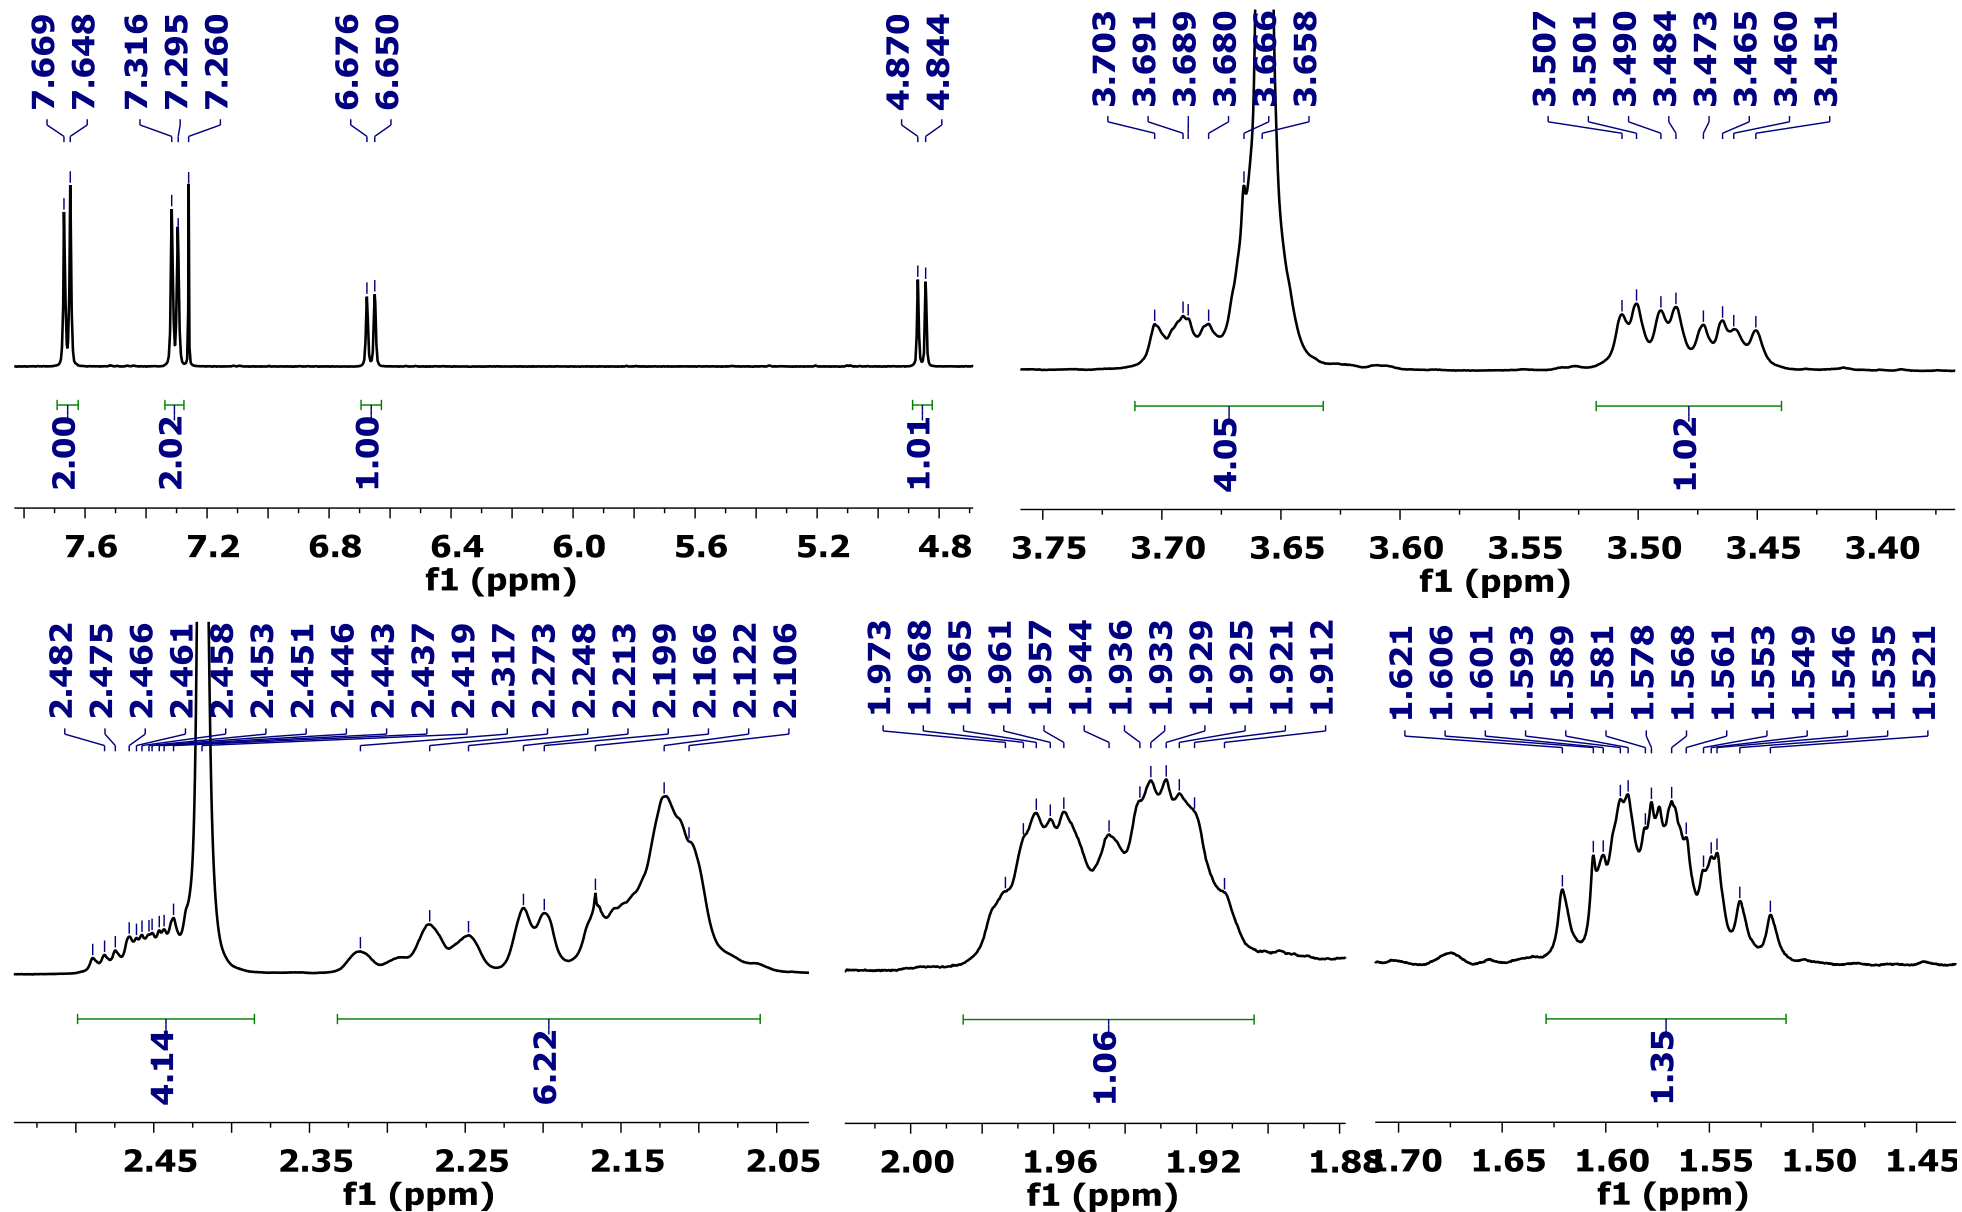

<sup>13</sup>C NMR (101 MHz, CDCl<sub>3</sub>)

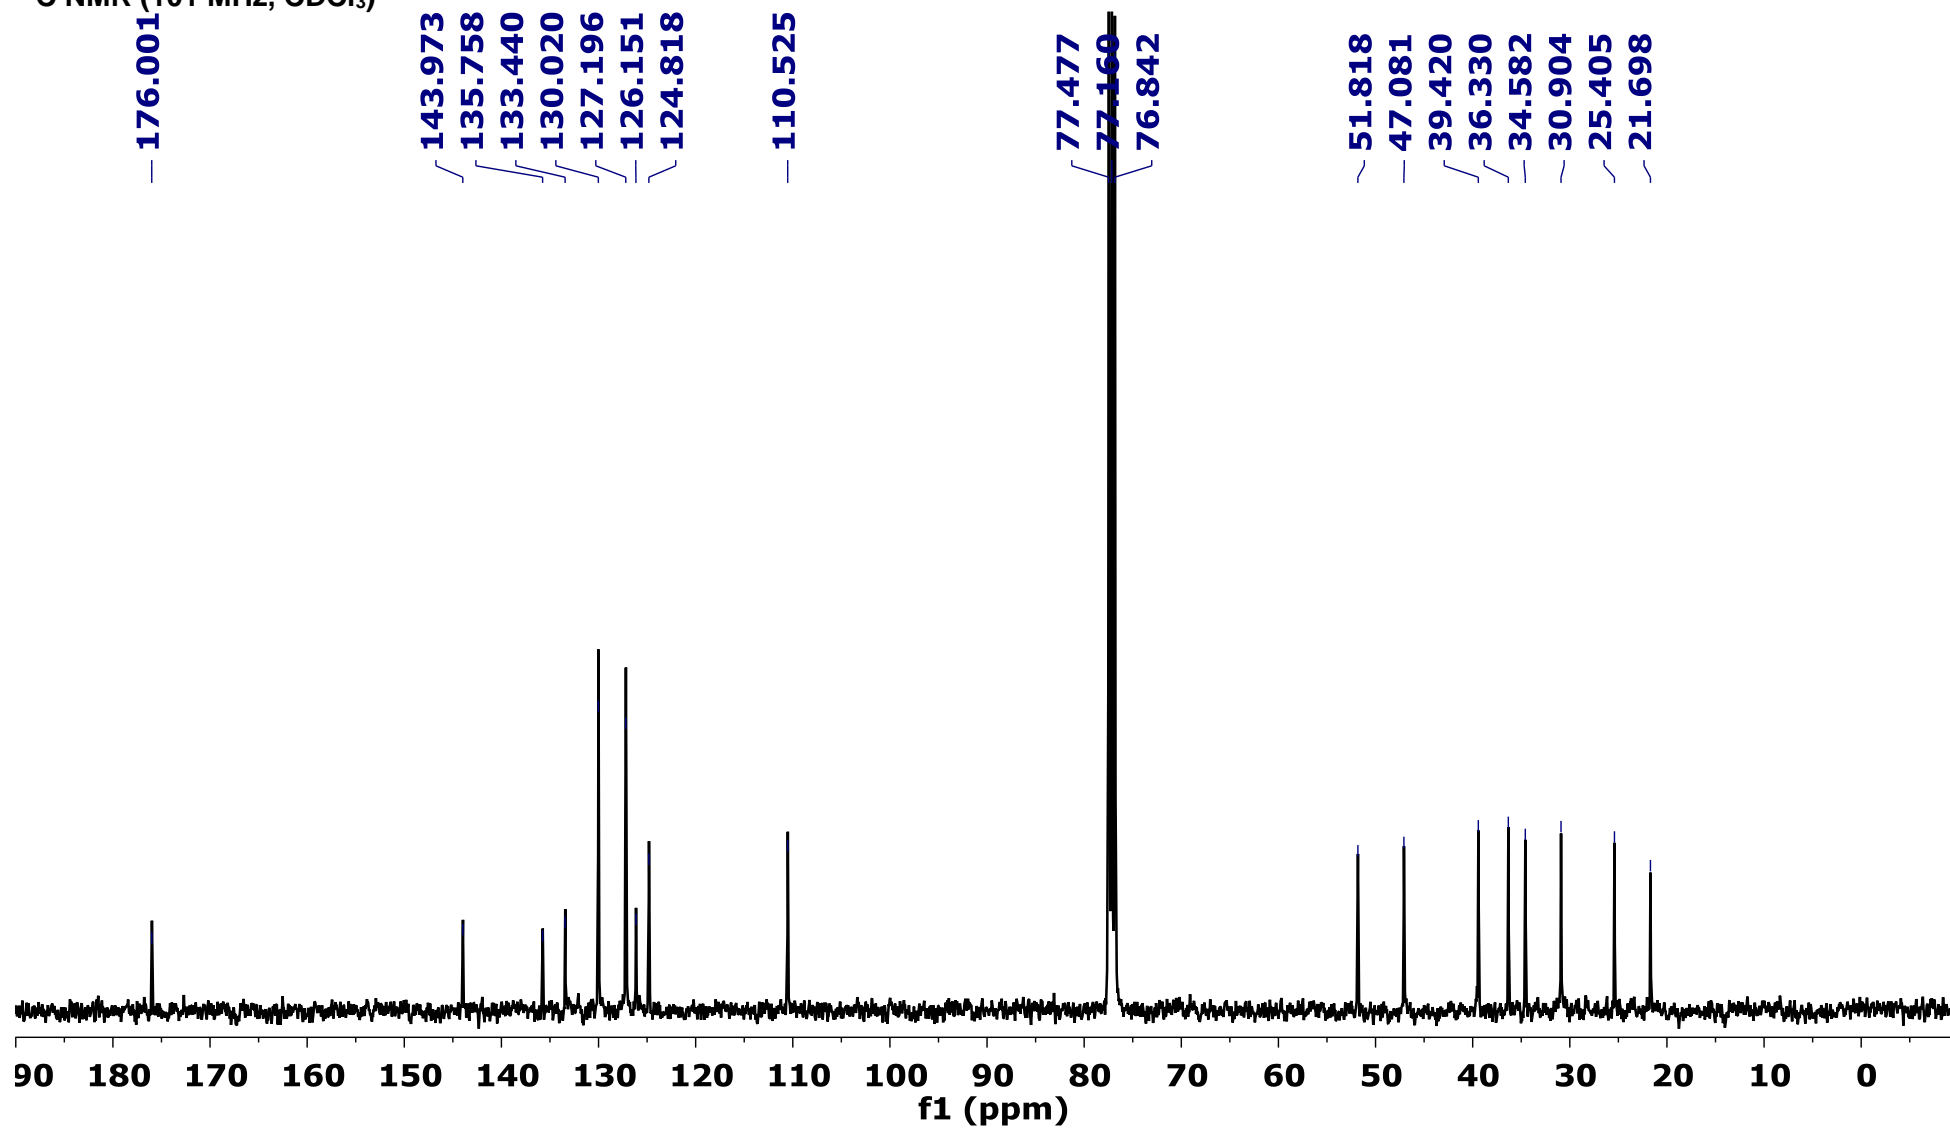

Product 3ac

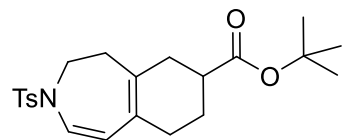

$^1\text{H}$  NMR (400 MHz,  $\text{CDCl}_3$ )

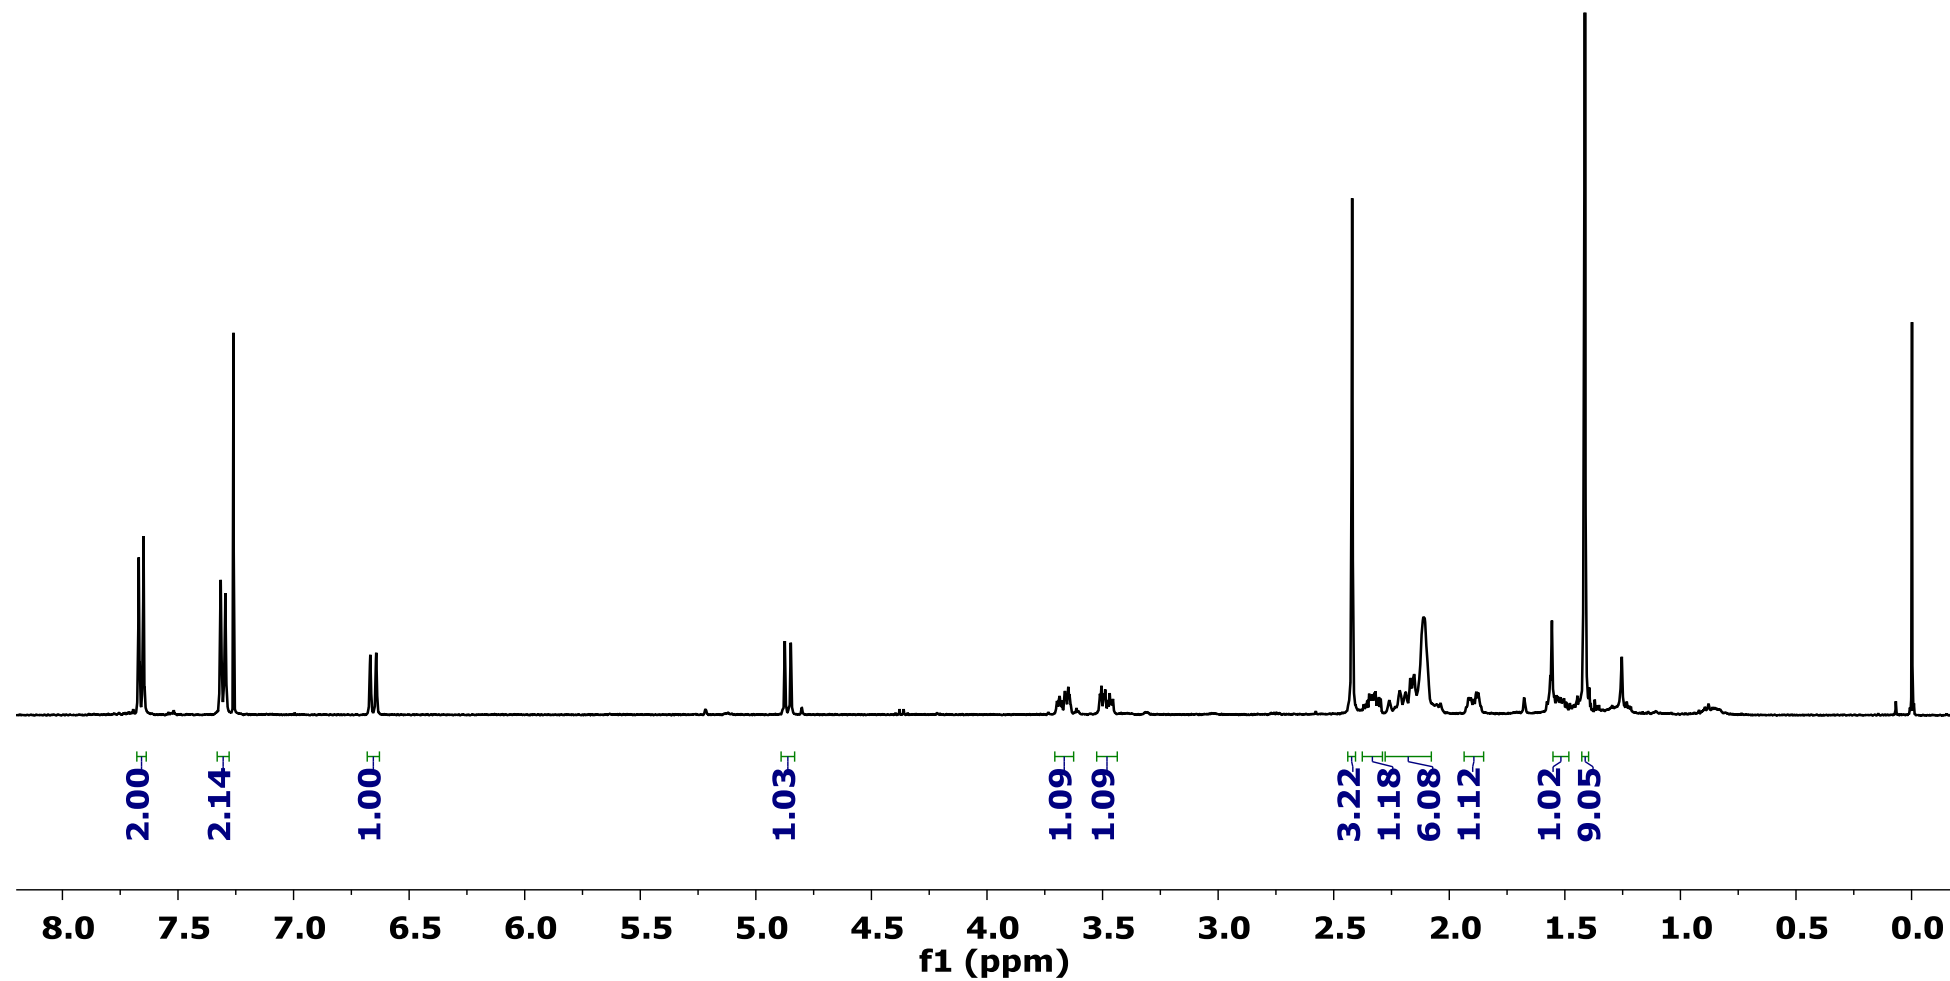

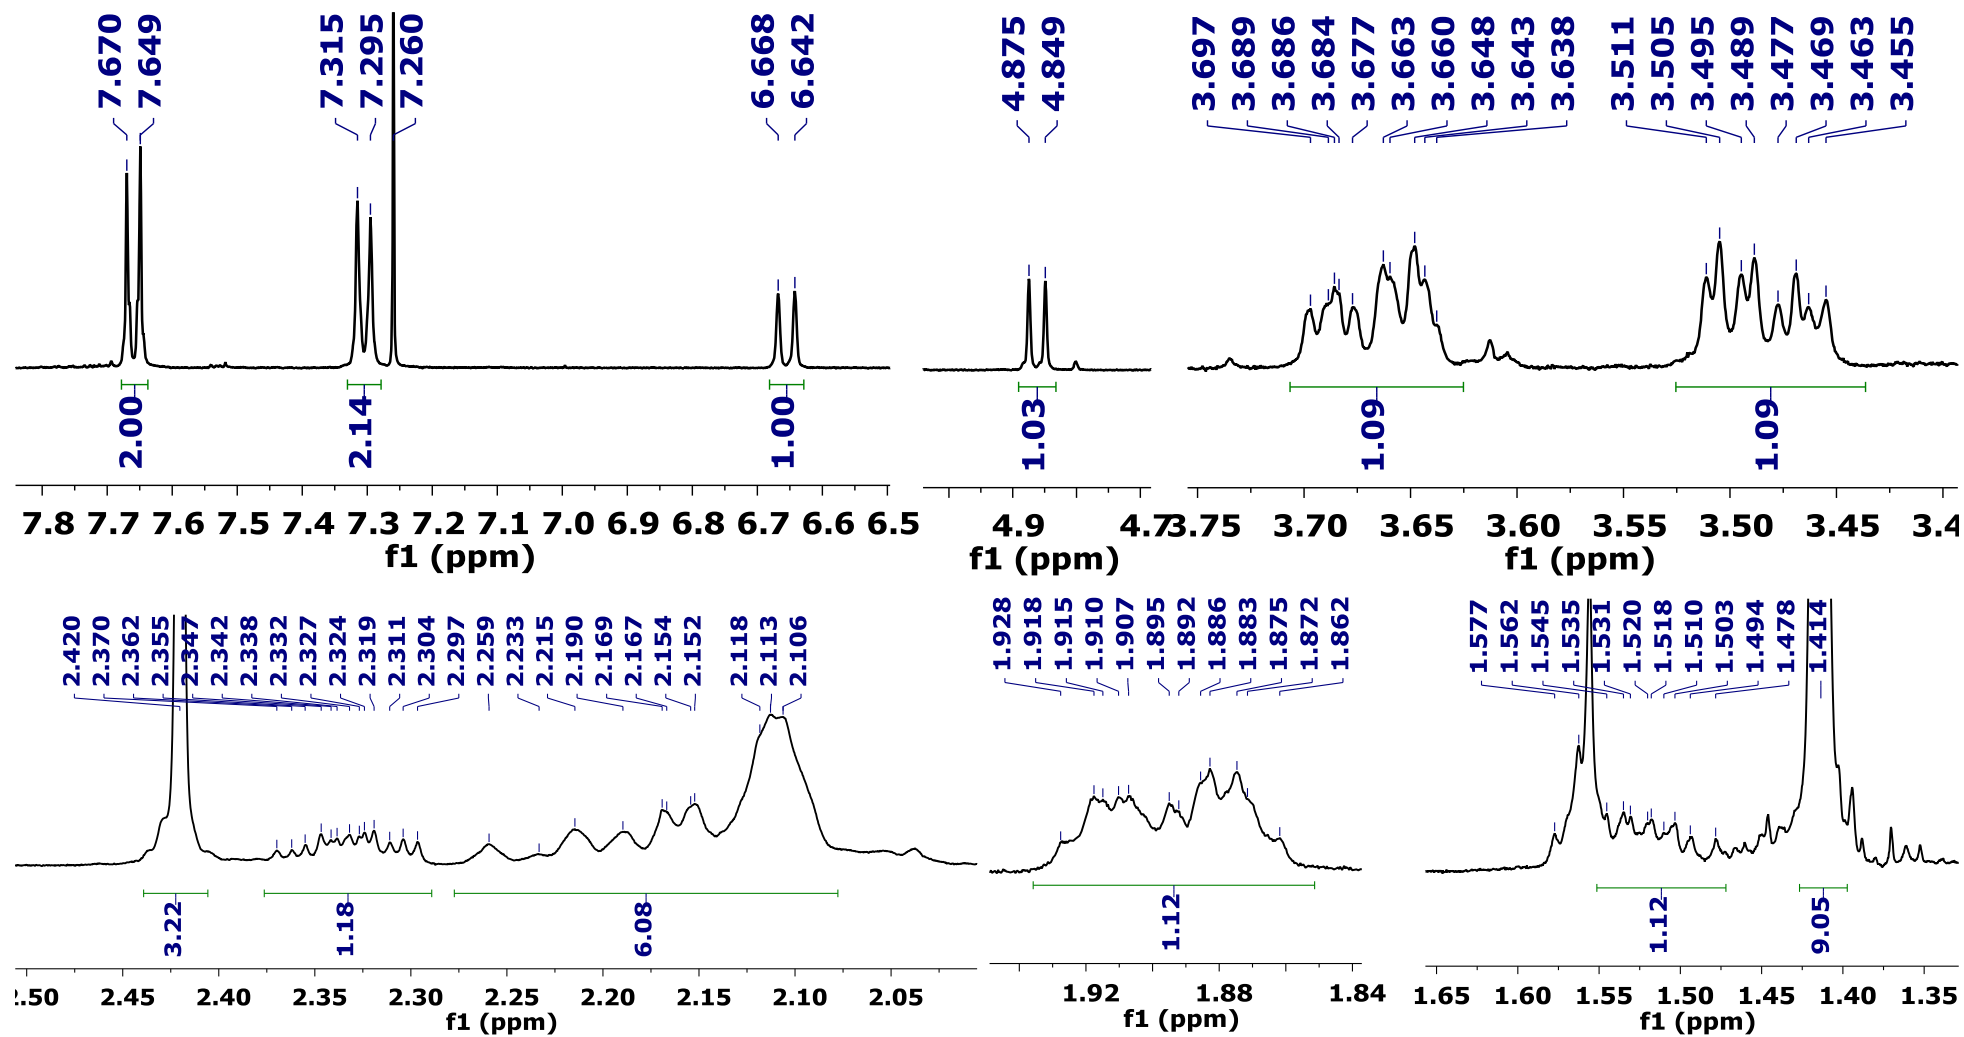

<sup>13</sup>C NMR (101 MHz, CDCl<sub>3</sub>)

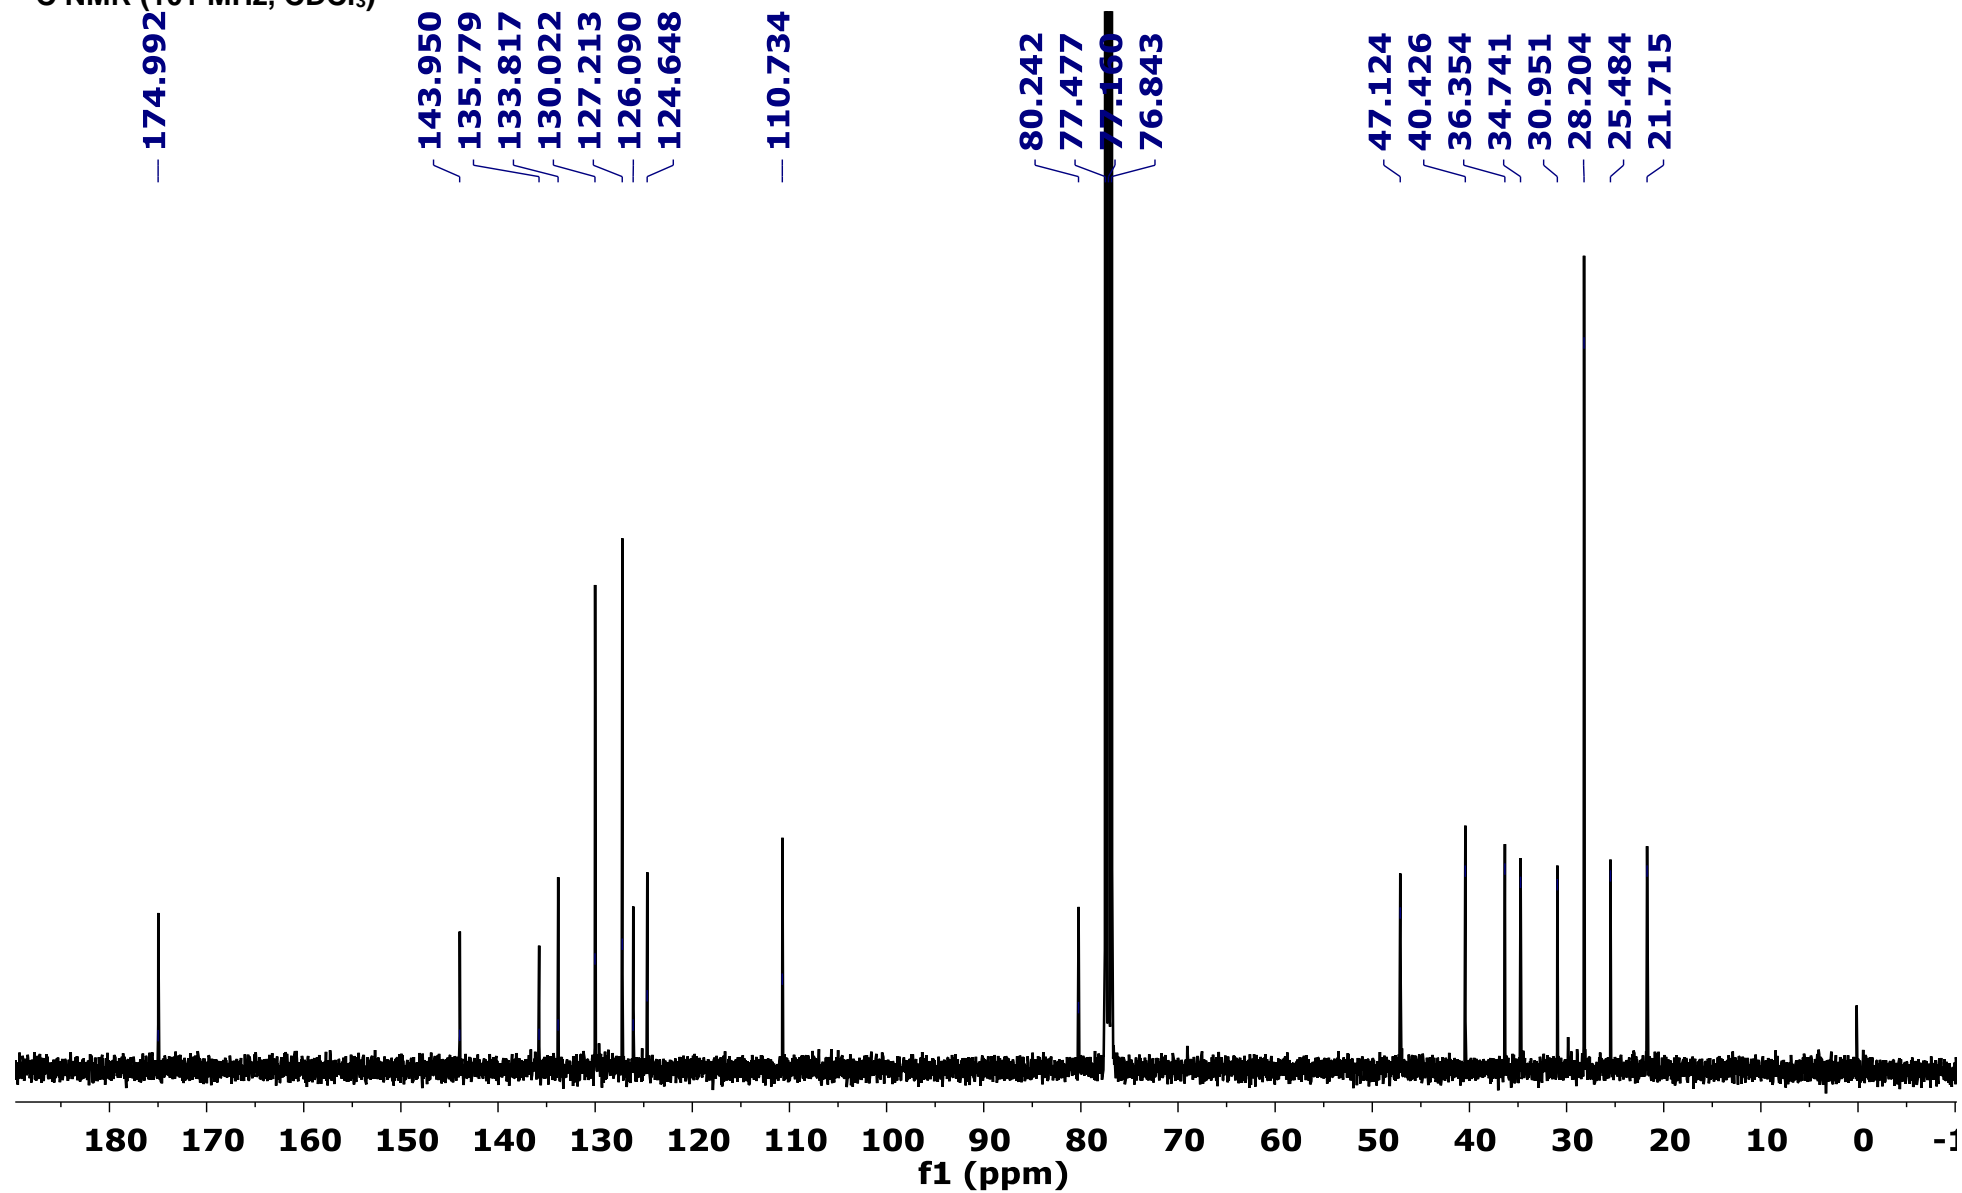

Product 3ad

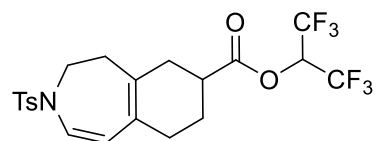

$^1\text{H}$  NMR (400 MHz,  $\text{CDCl}_3$ )

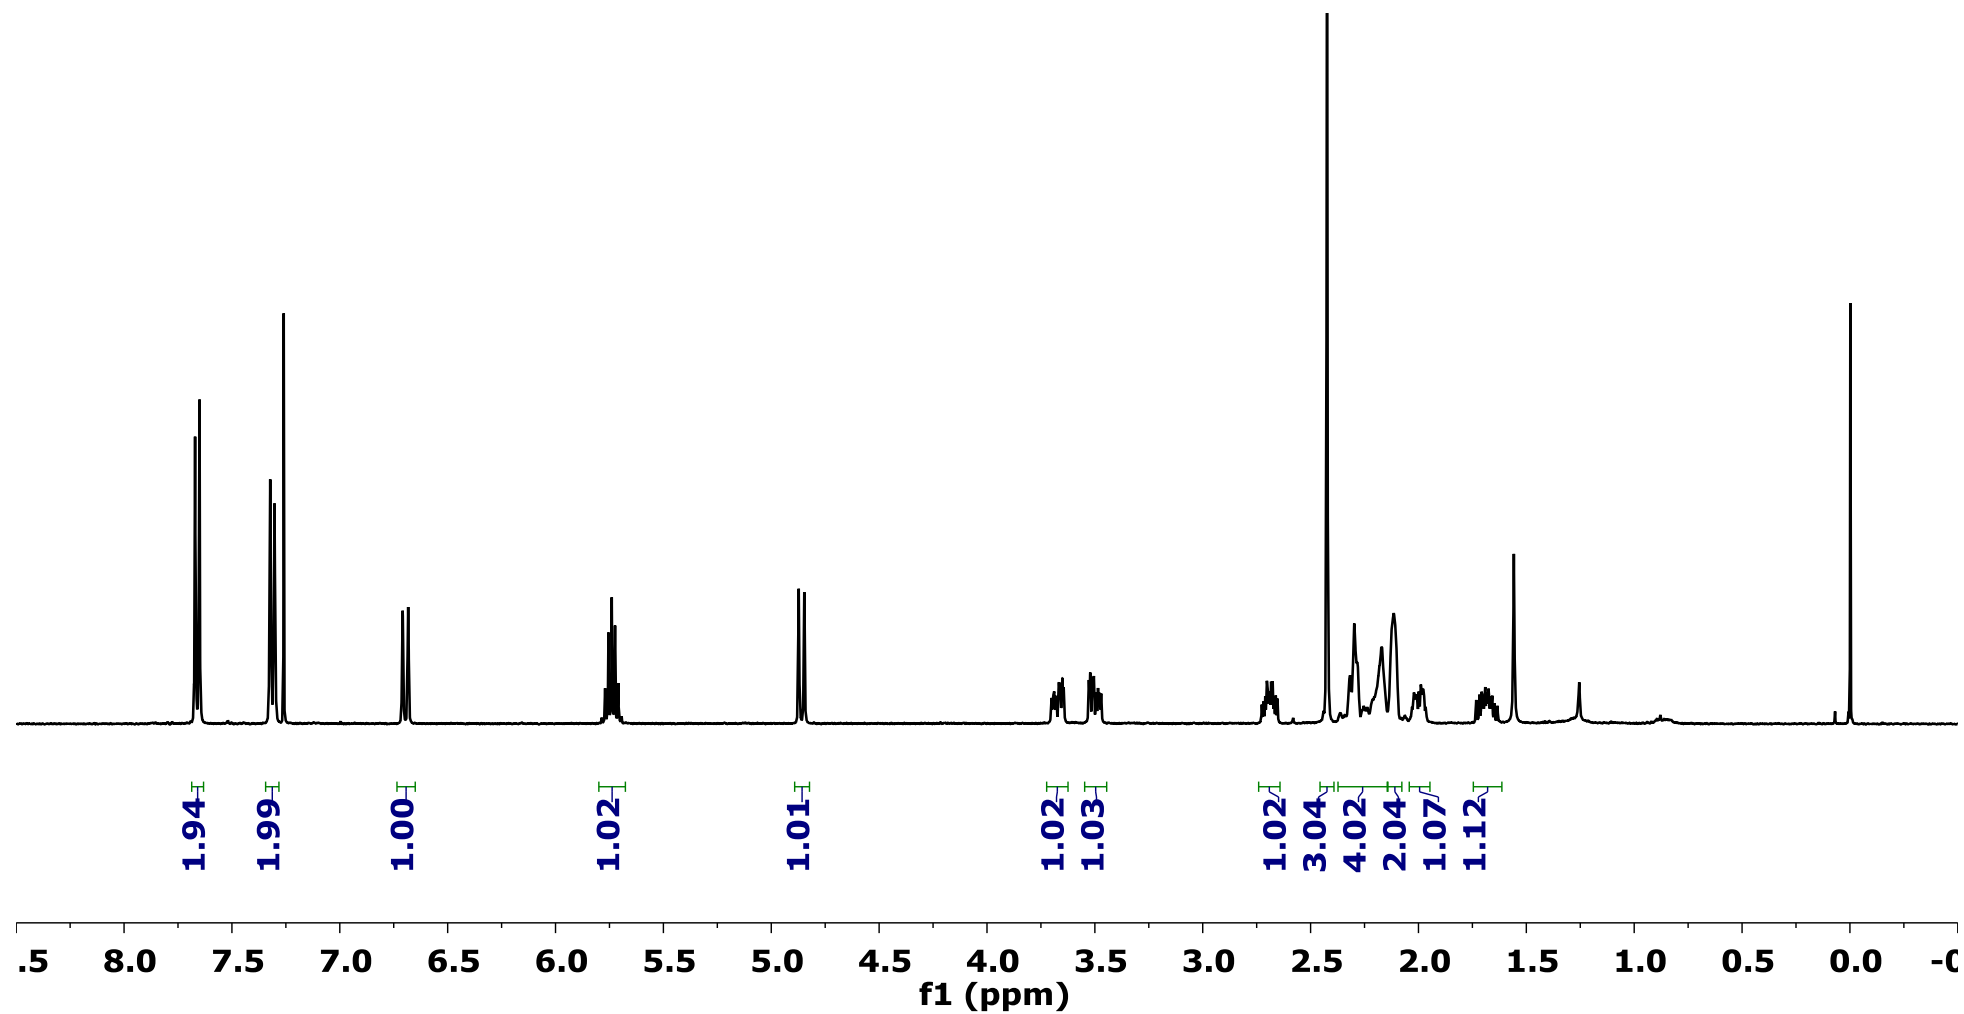

S43

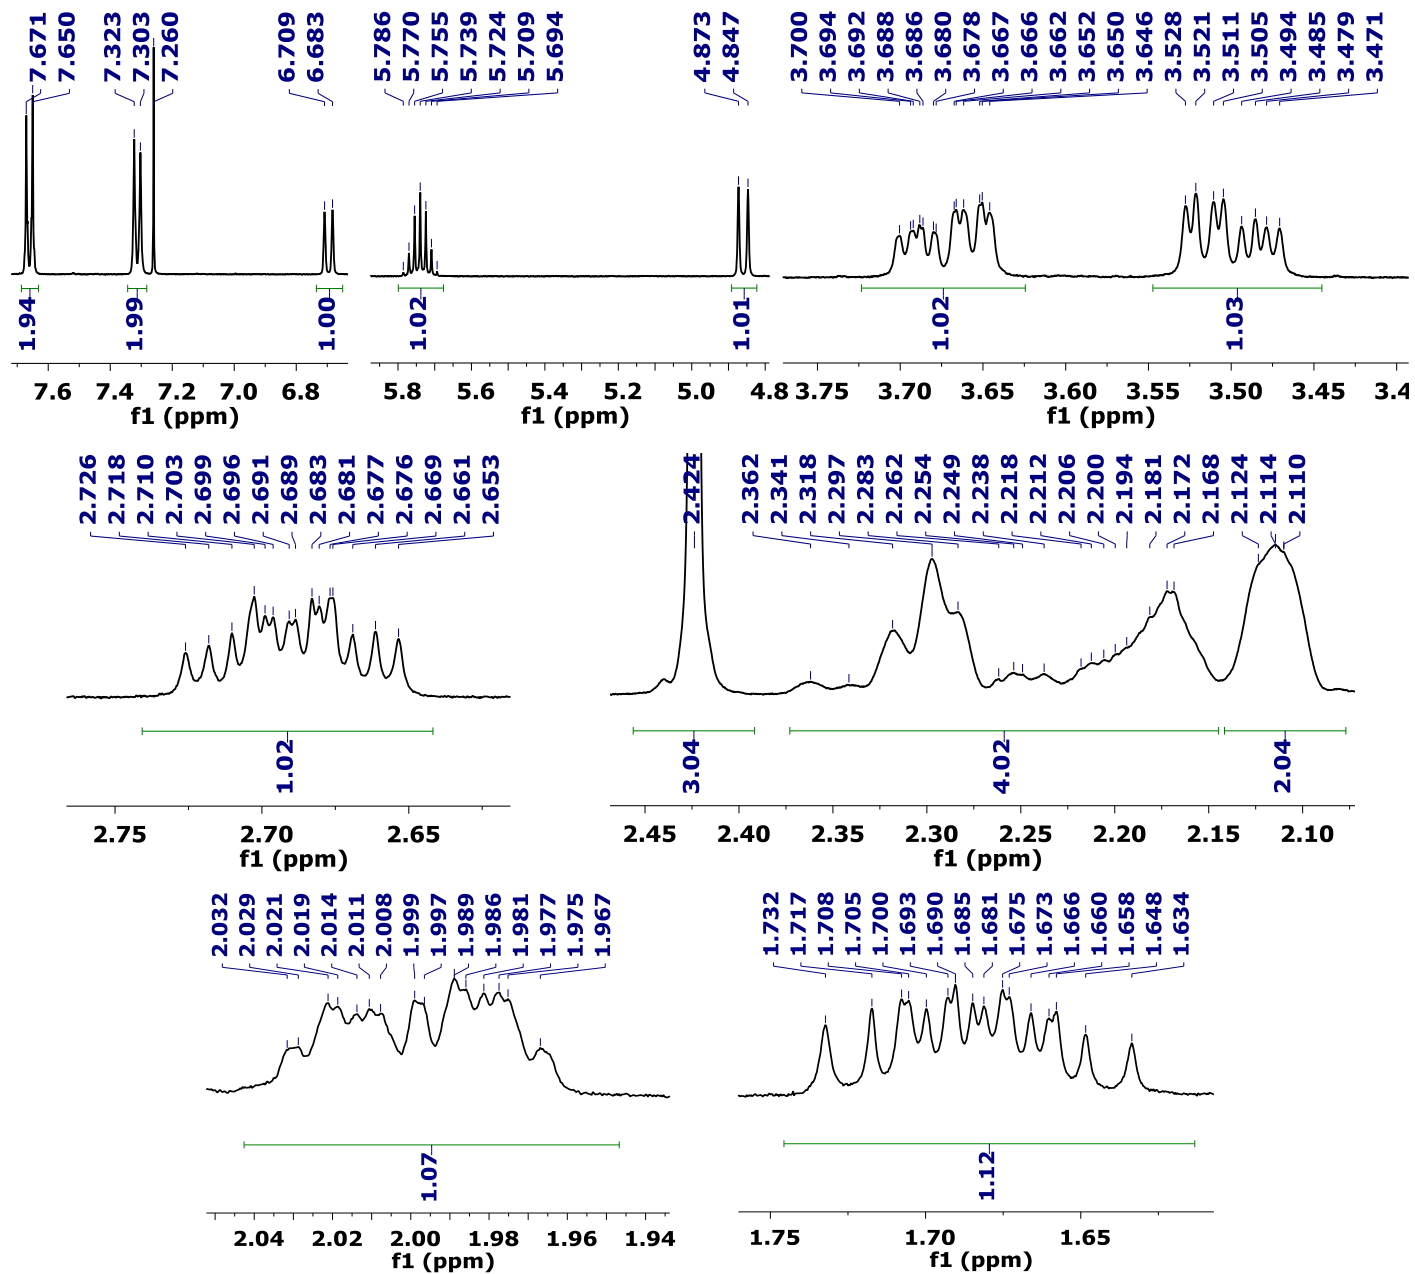



<sup>13</sup>C NMR (101 MHz, CDCl<sub>3</sub>)

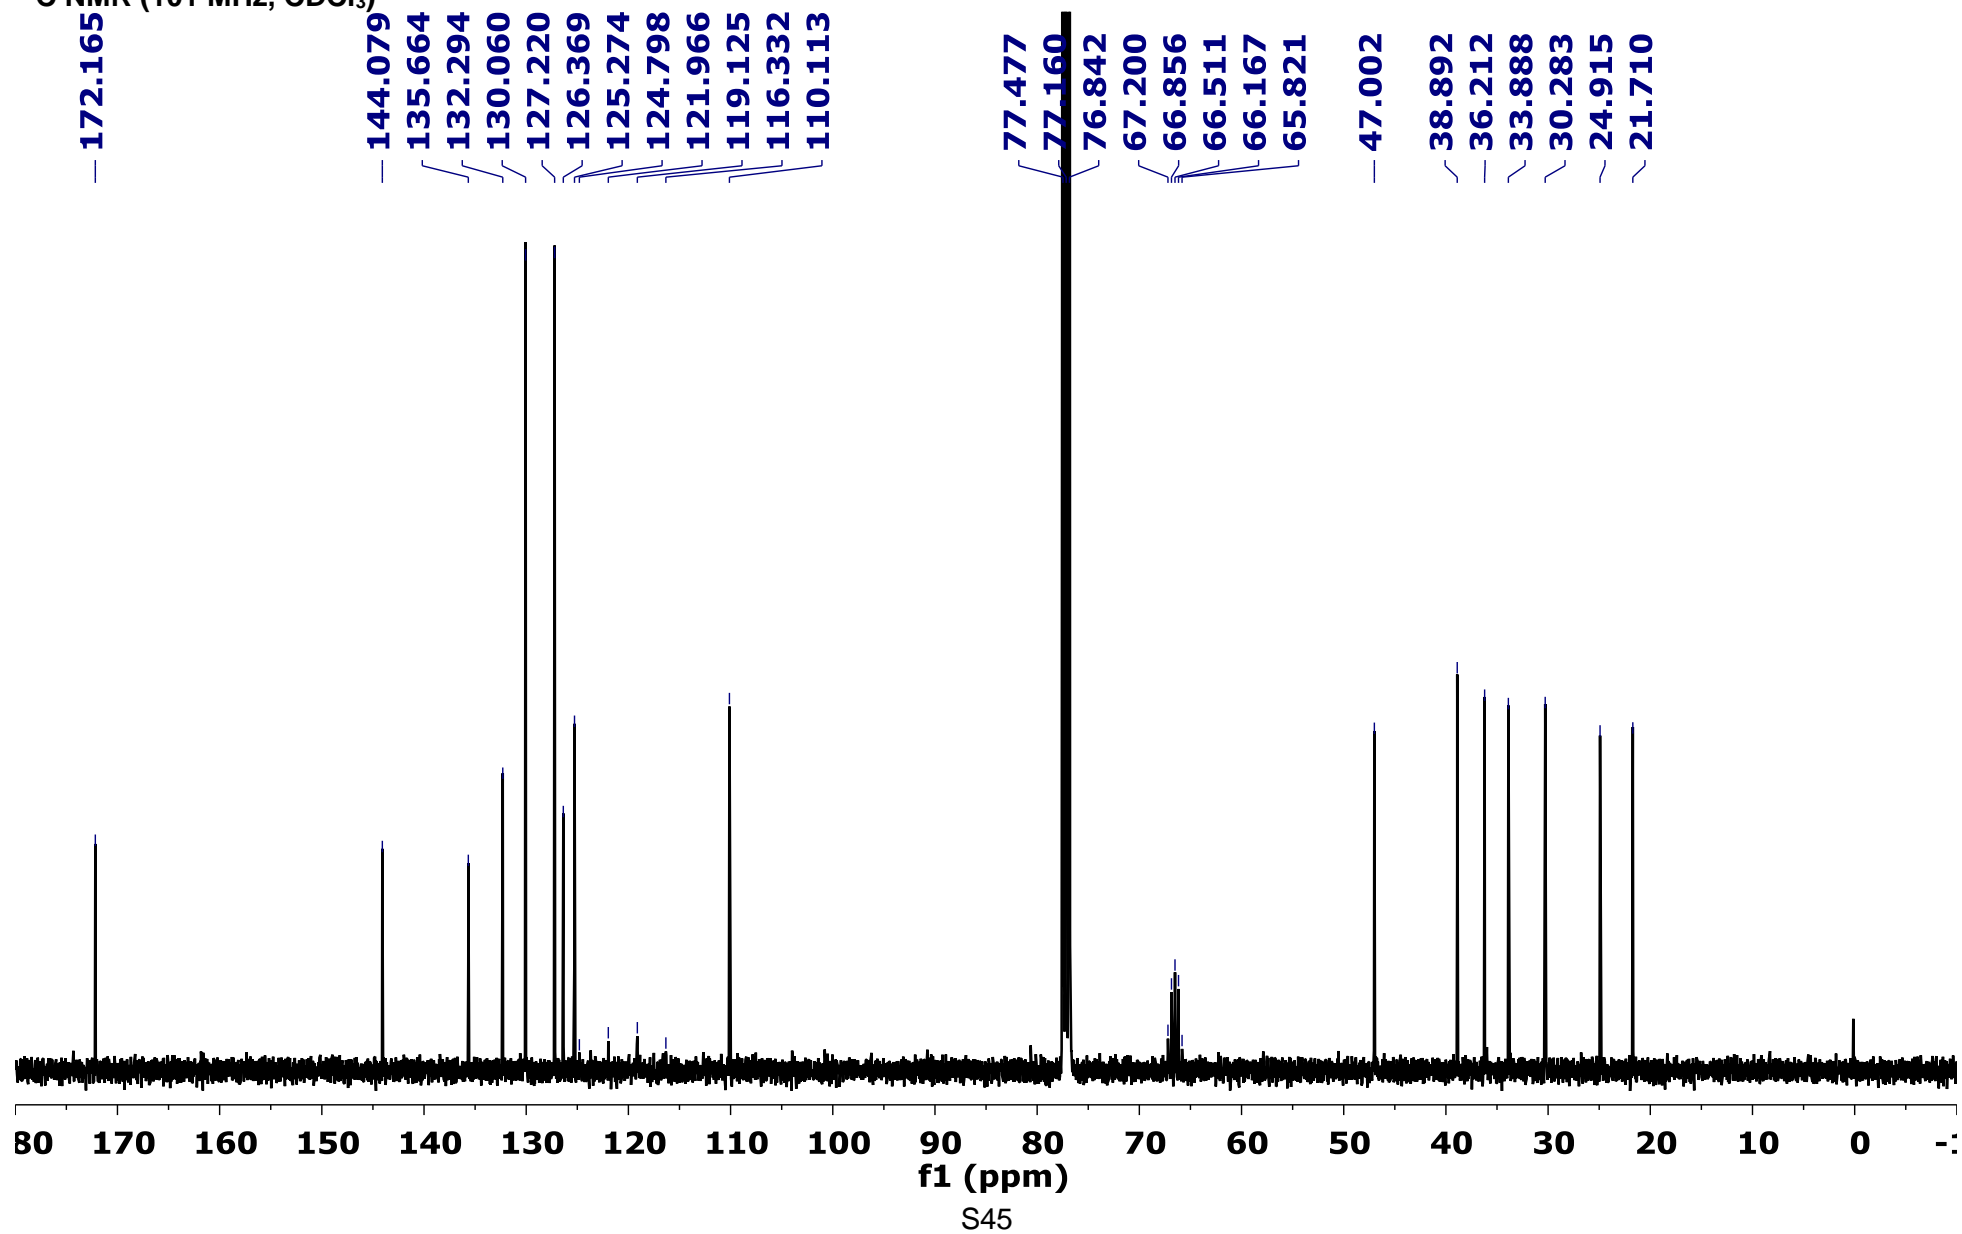

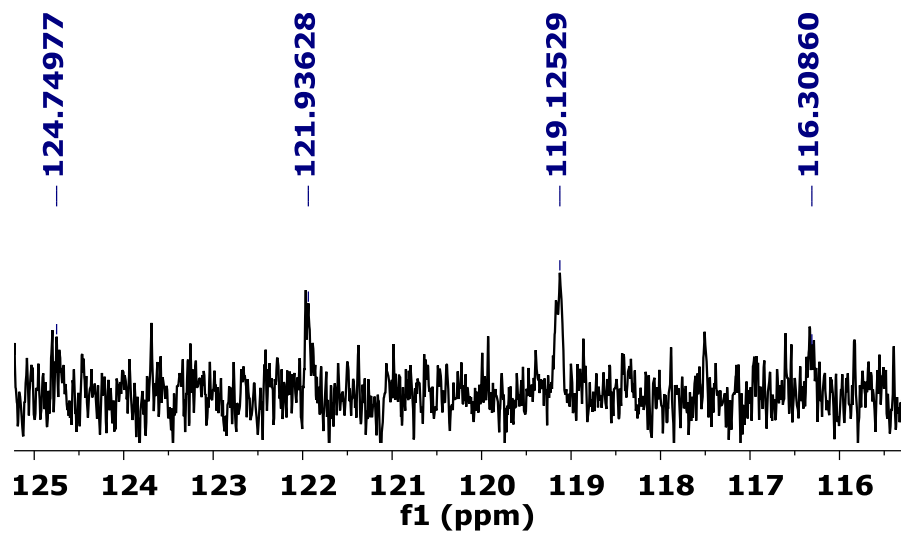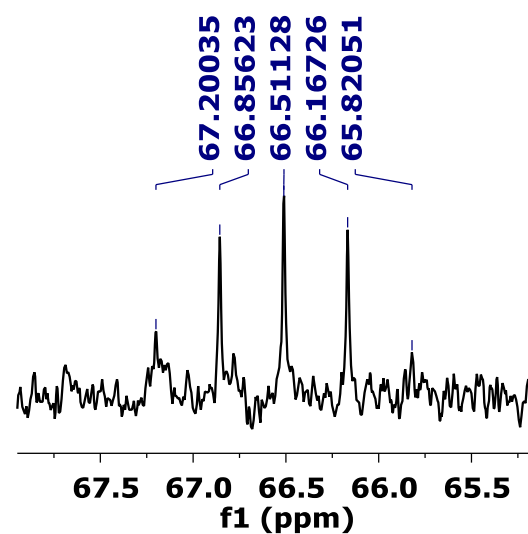

Product 3ae

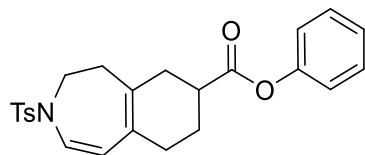

<sup>1</sup>H NMR (400 MHz, CDCl<sub>3</sub>)

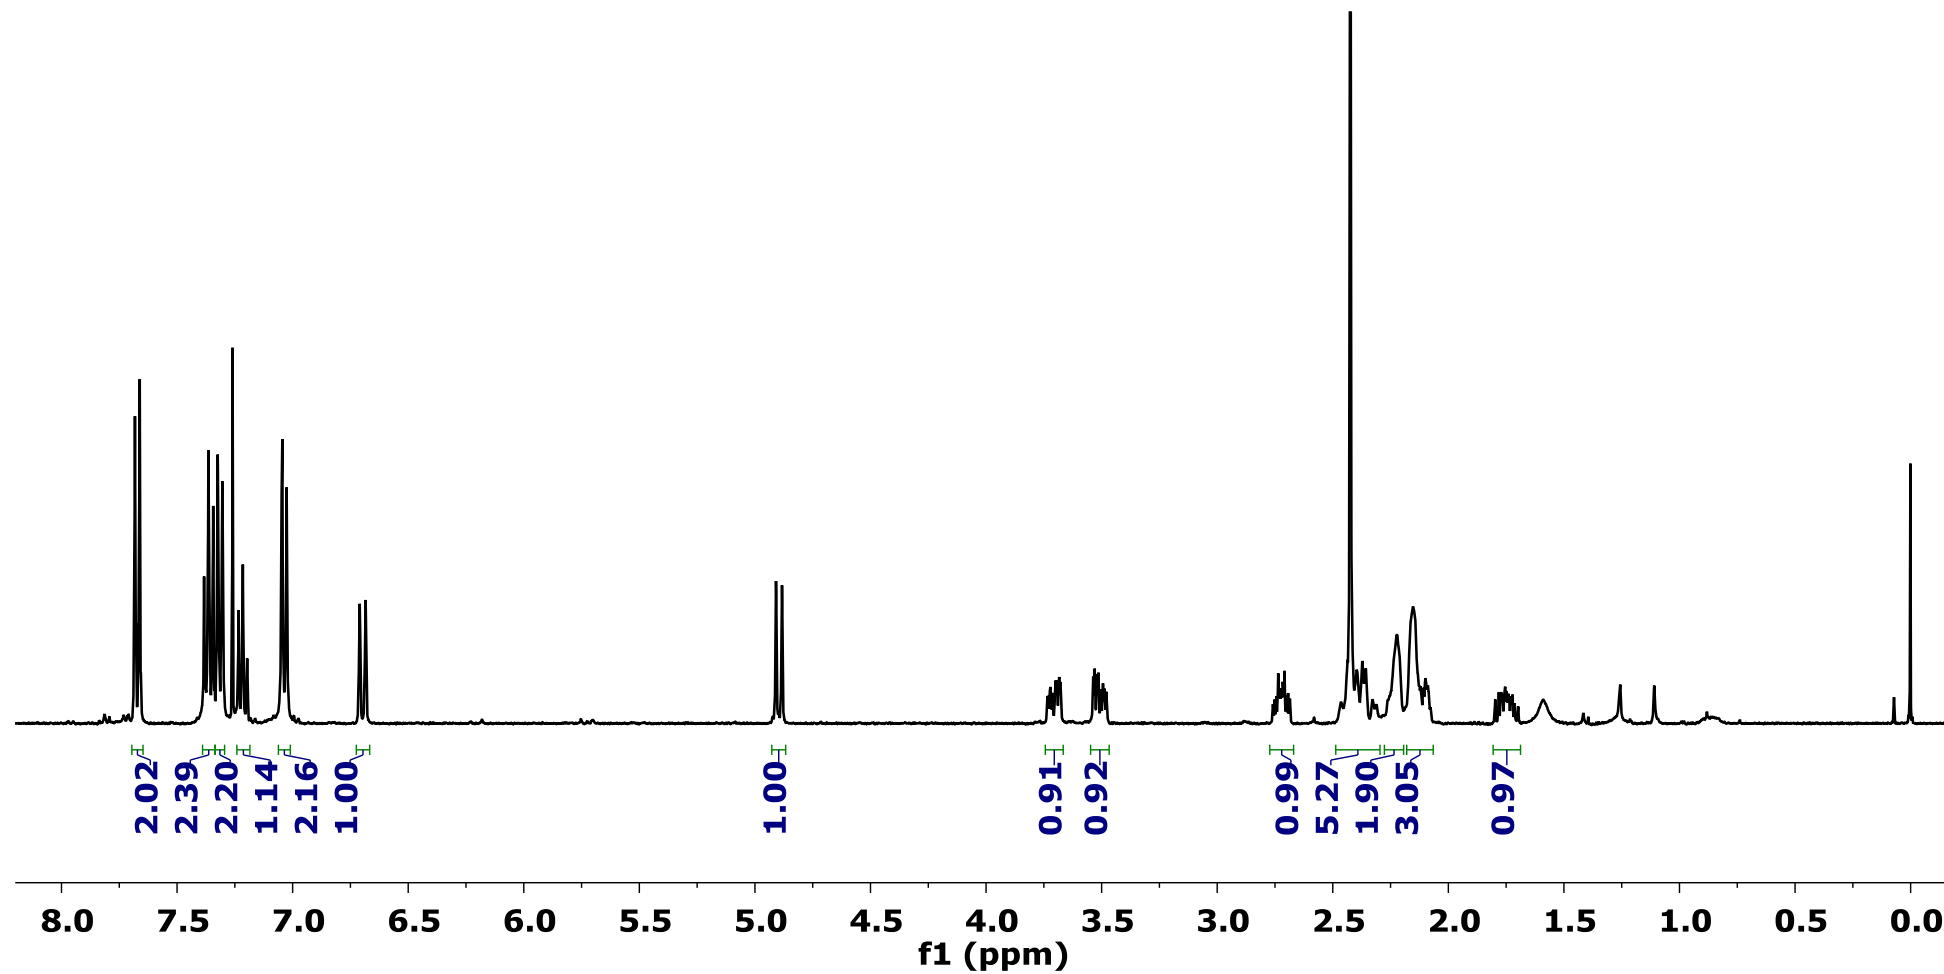

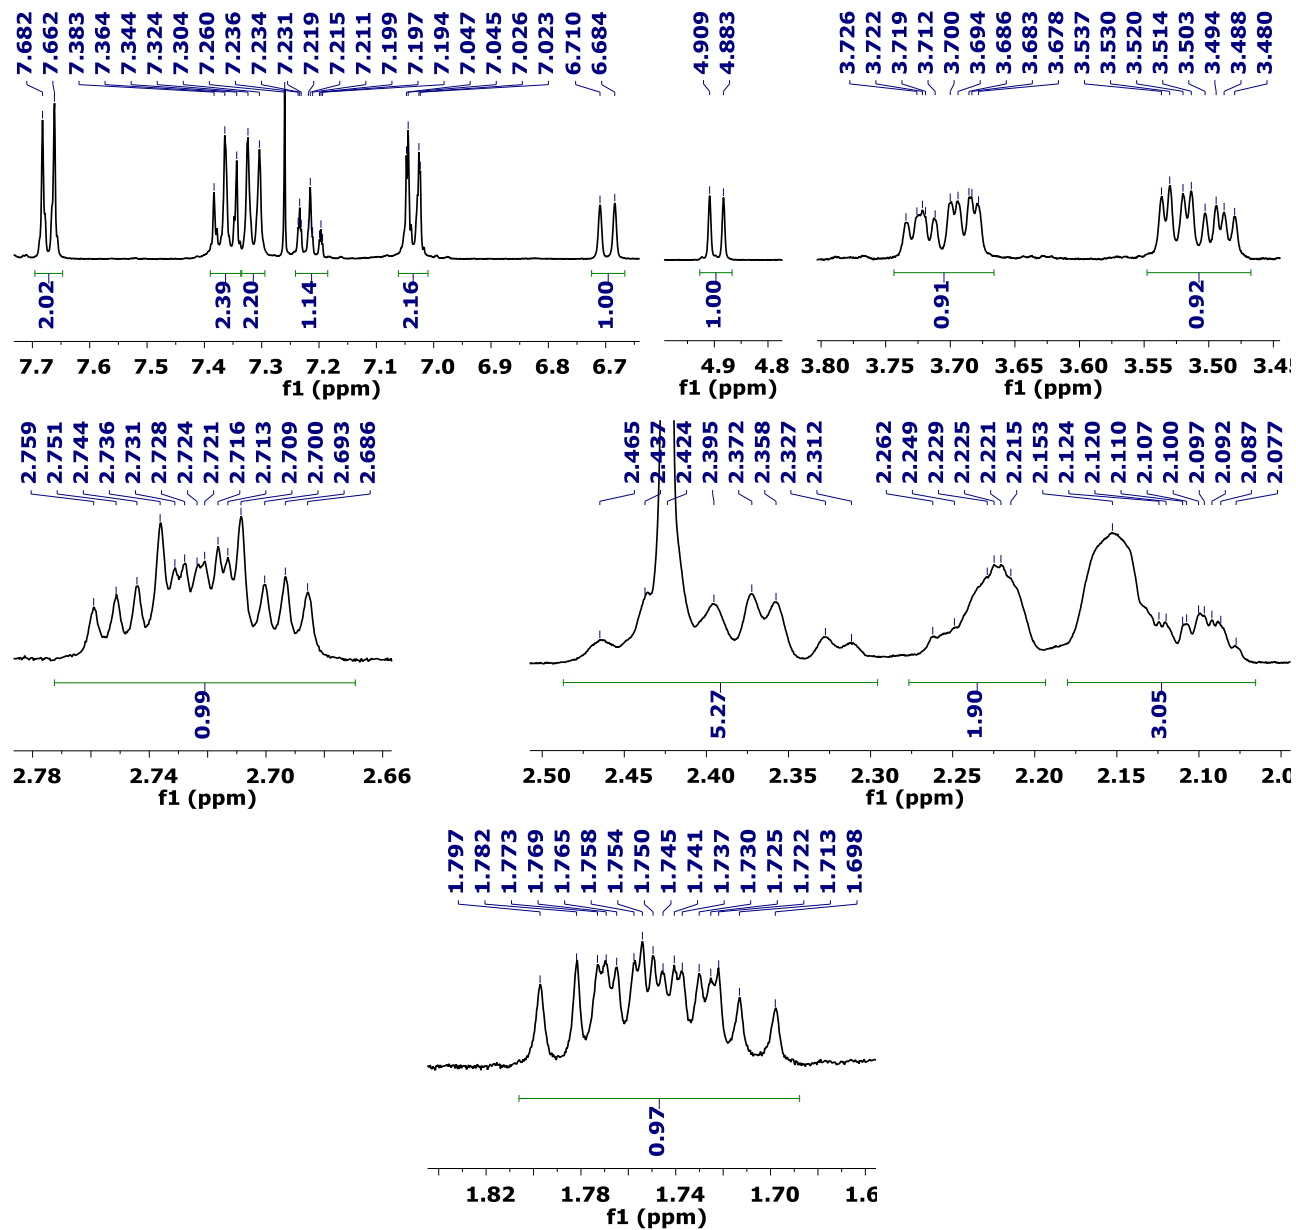

<sup>13</sup>C NMR (101 MHz, CDCl<sub>3</sub>)

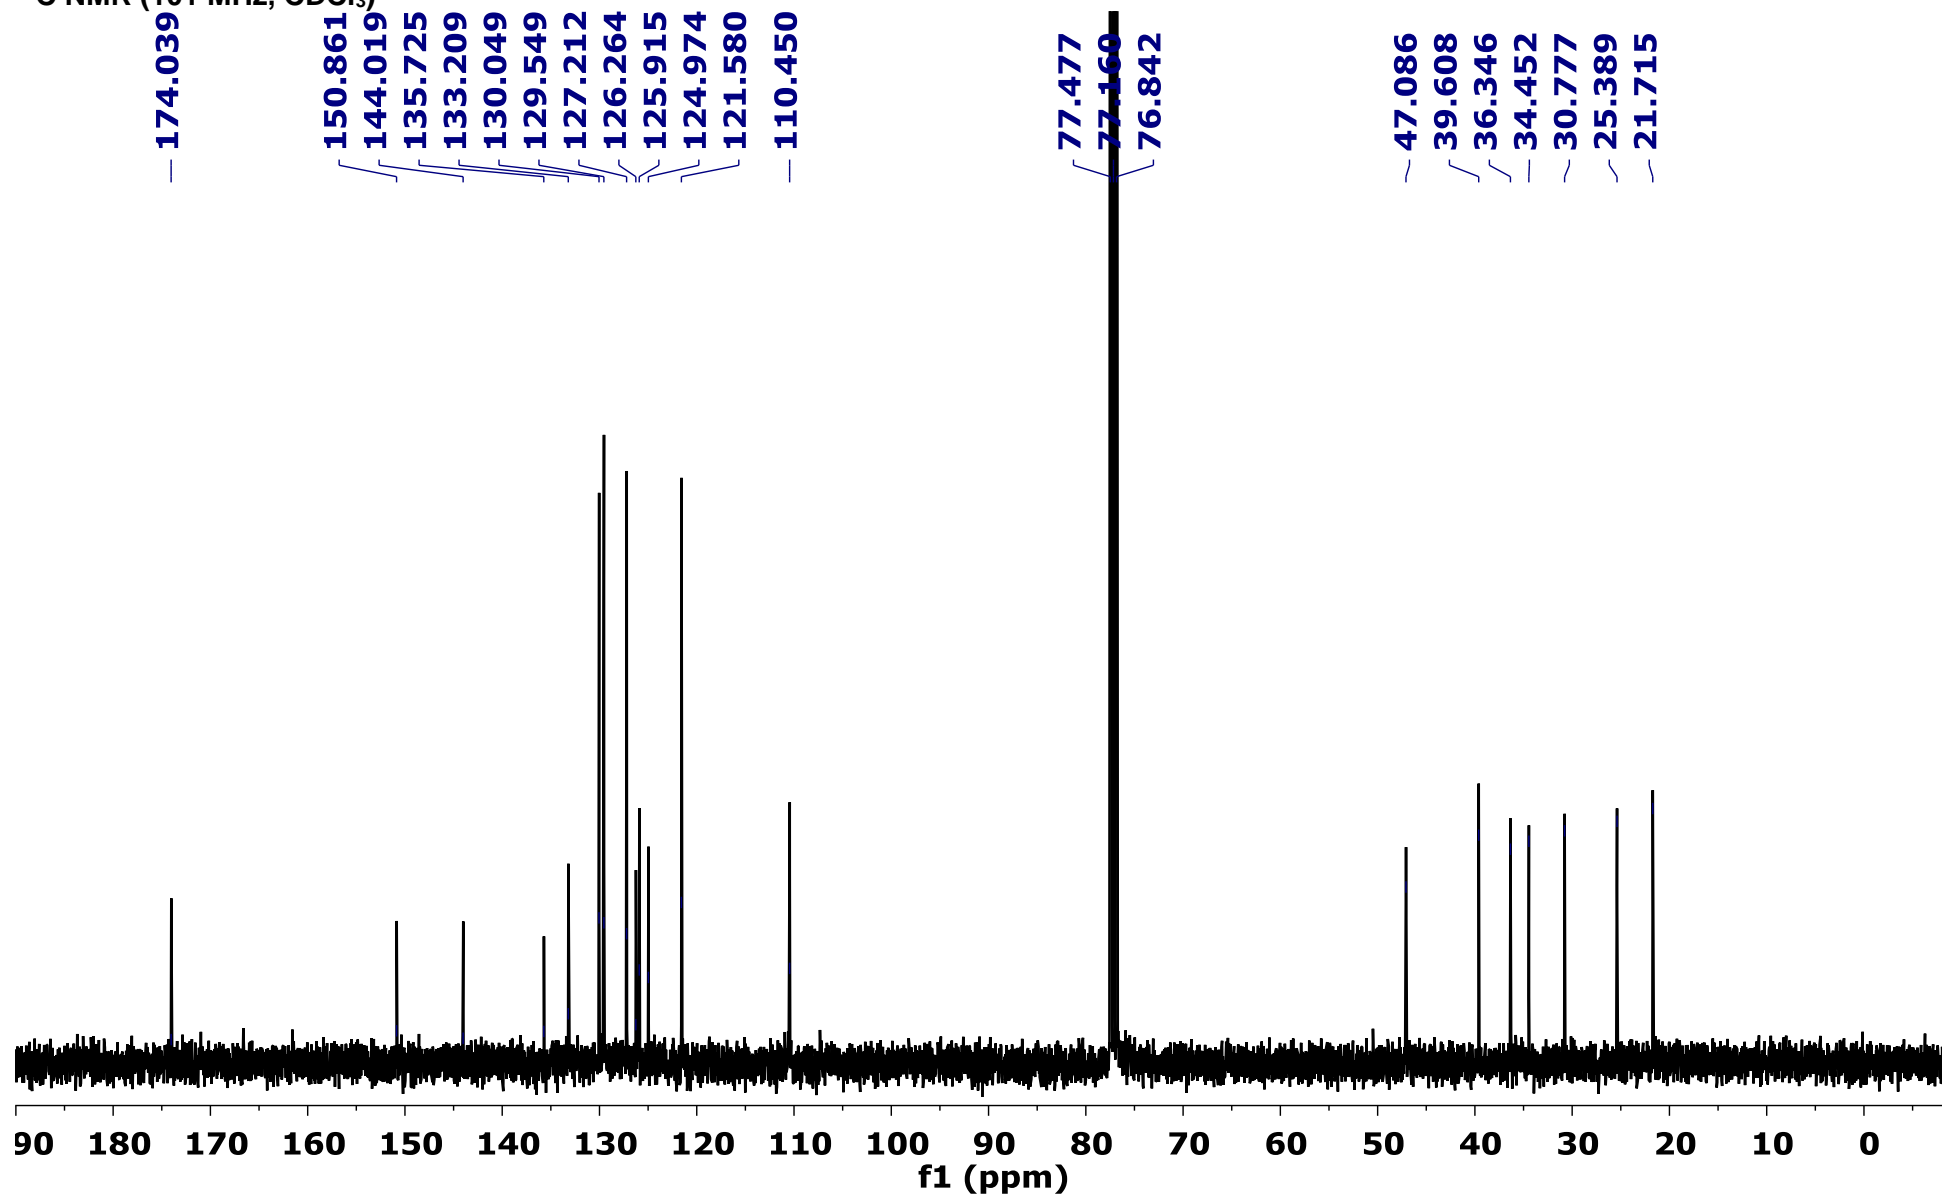

Product 3af

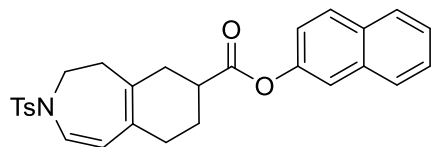

$^1\text{H}$  NMR (400 MHz,  $\text{CDCl}_3$ )

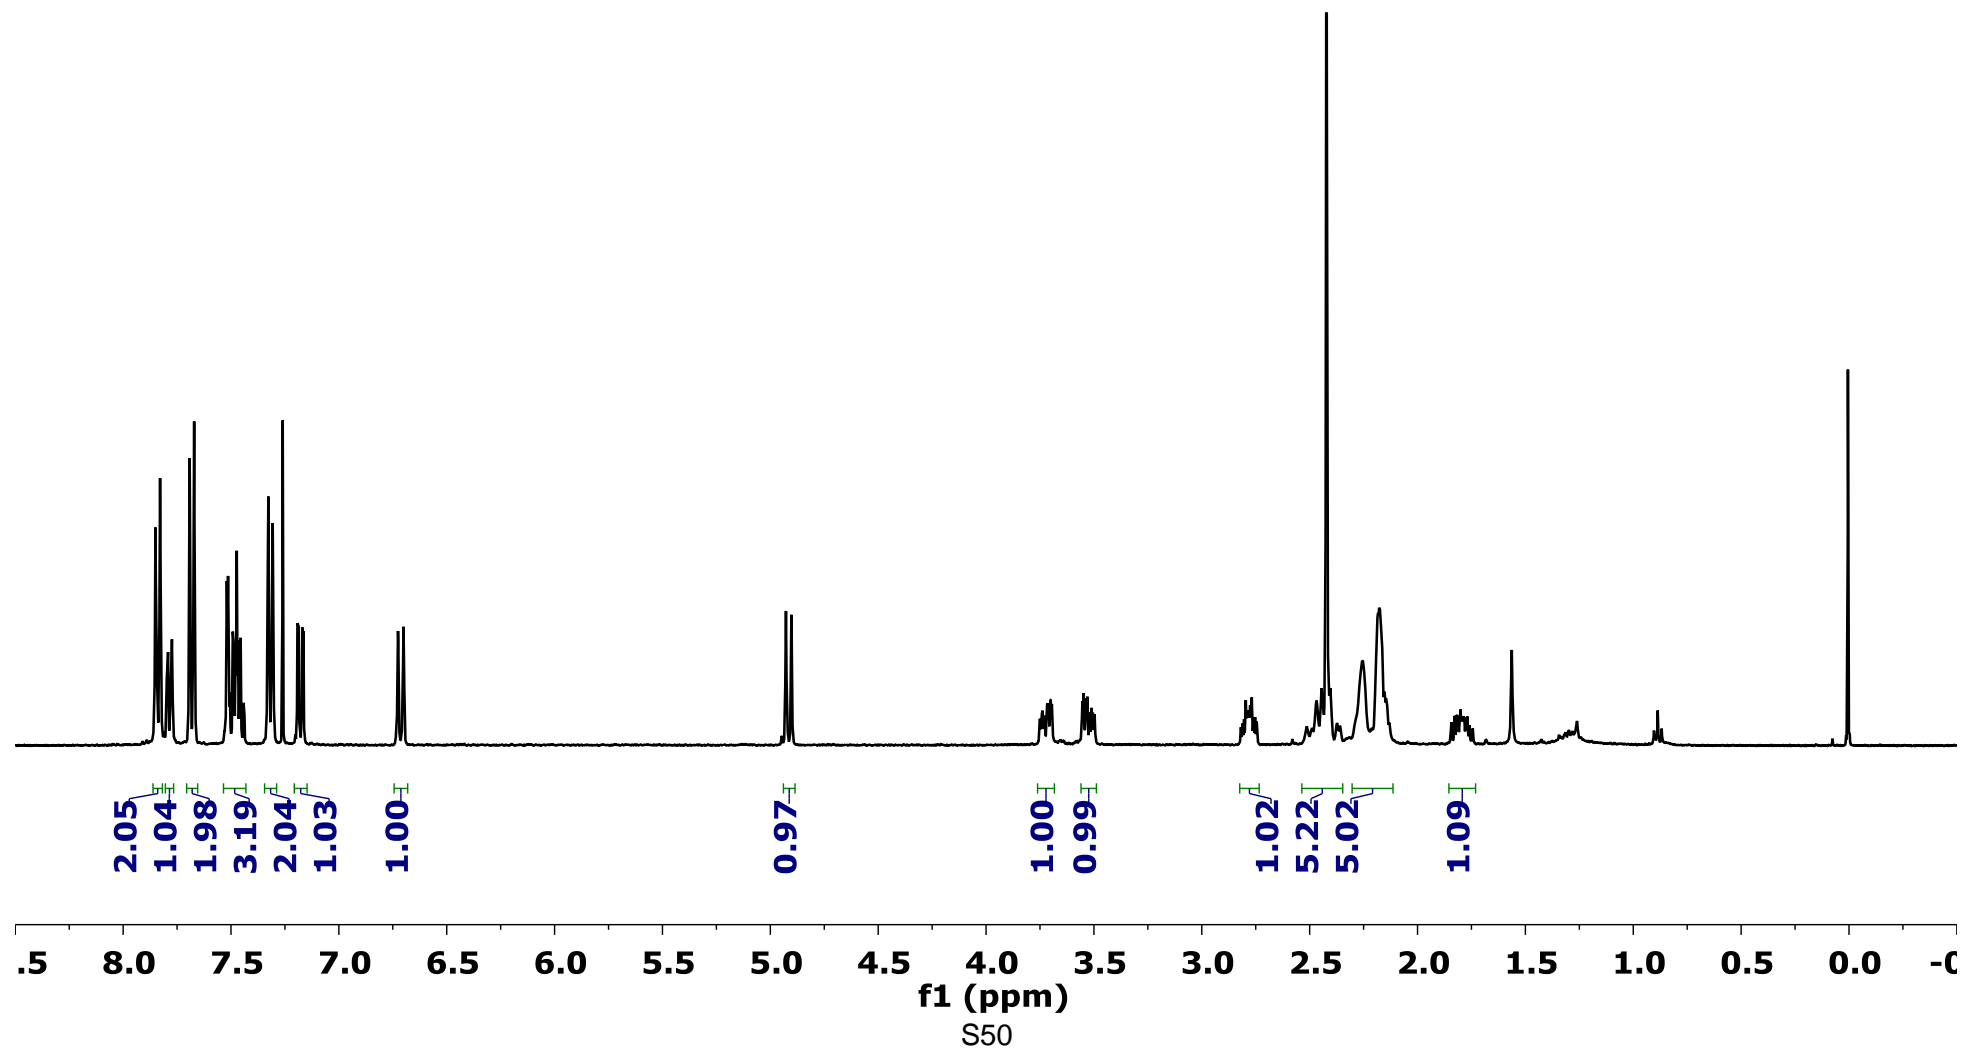

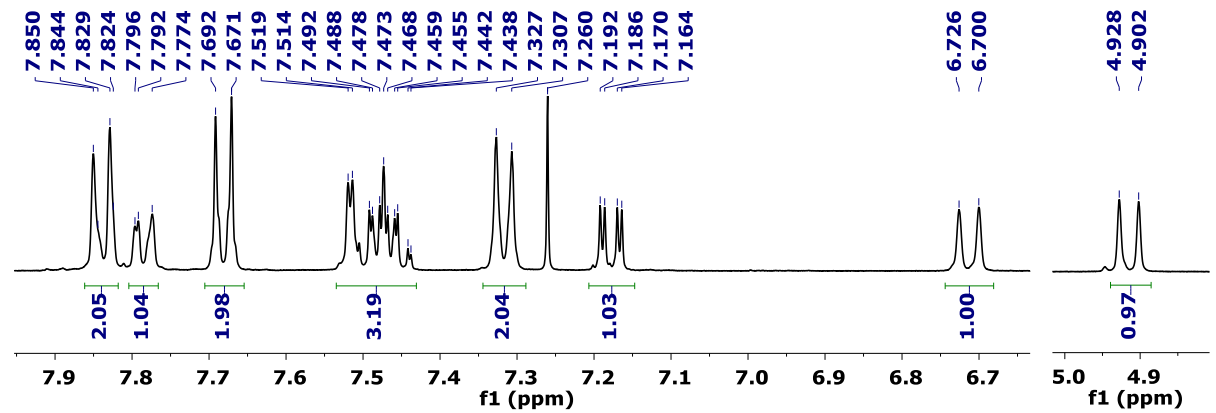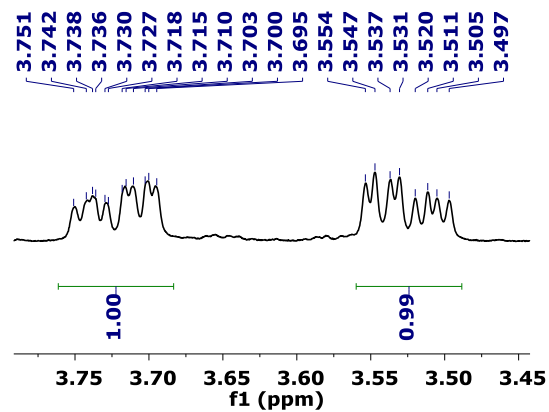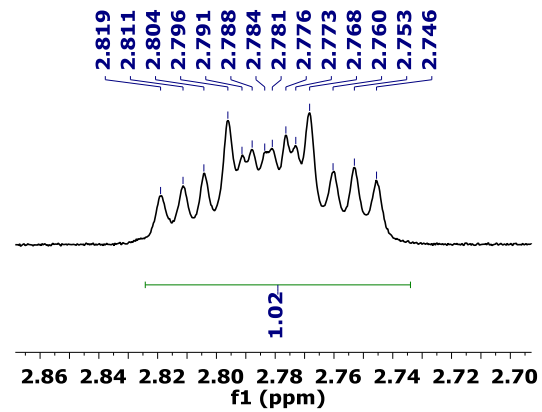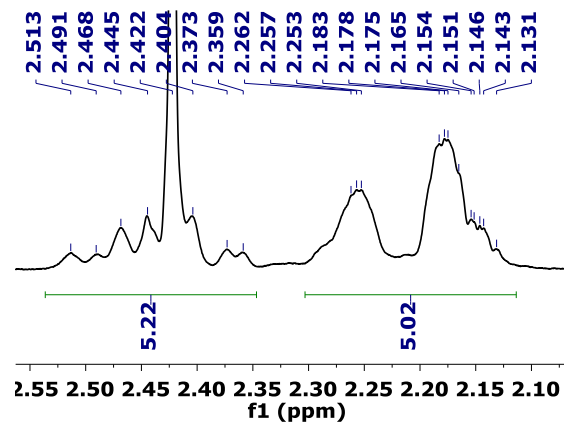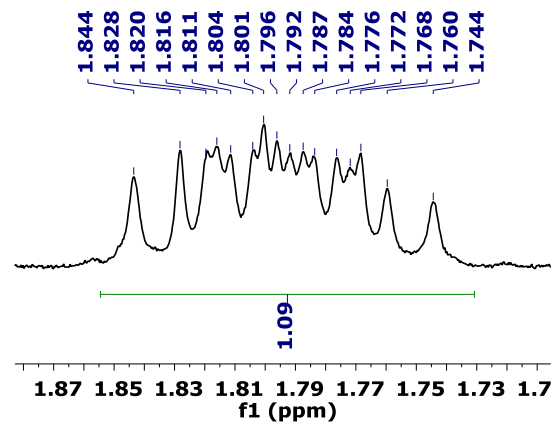

<sup>13</sup>C NMR (101 MHz, CDCl<sub>3</sub>)

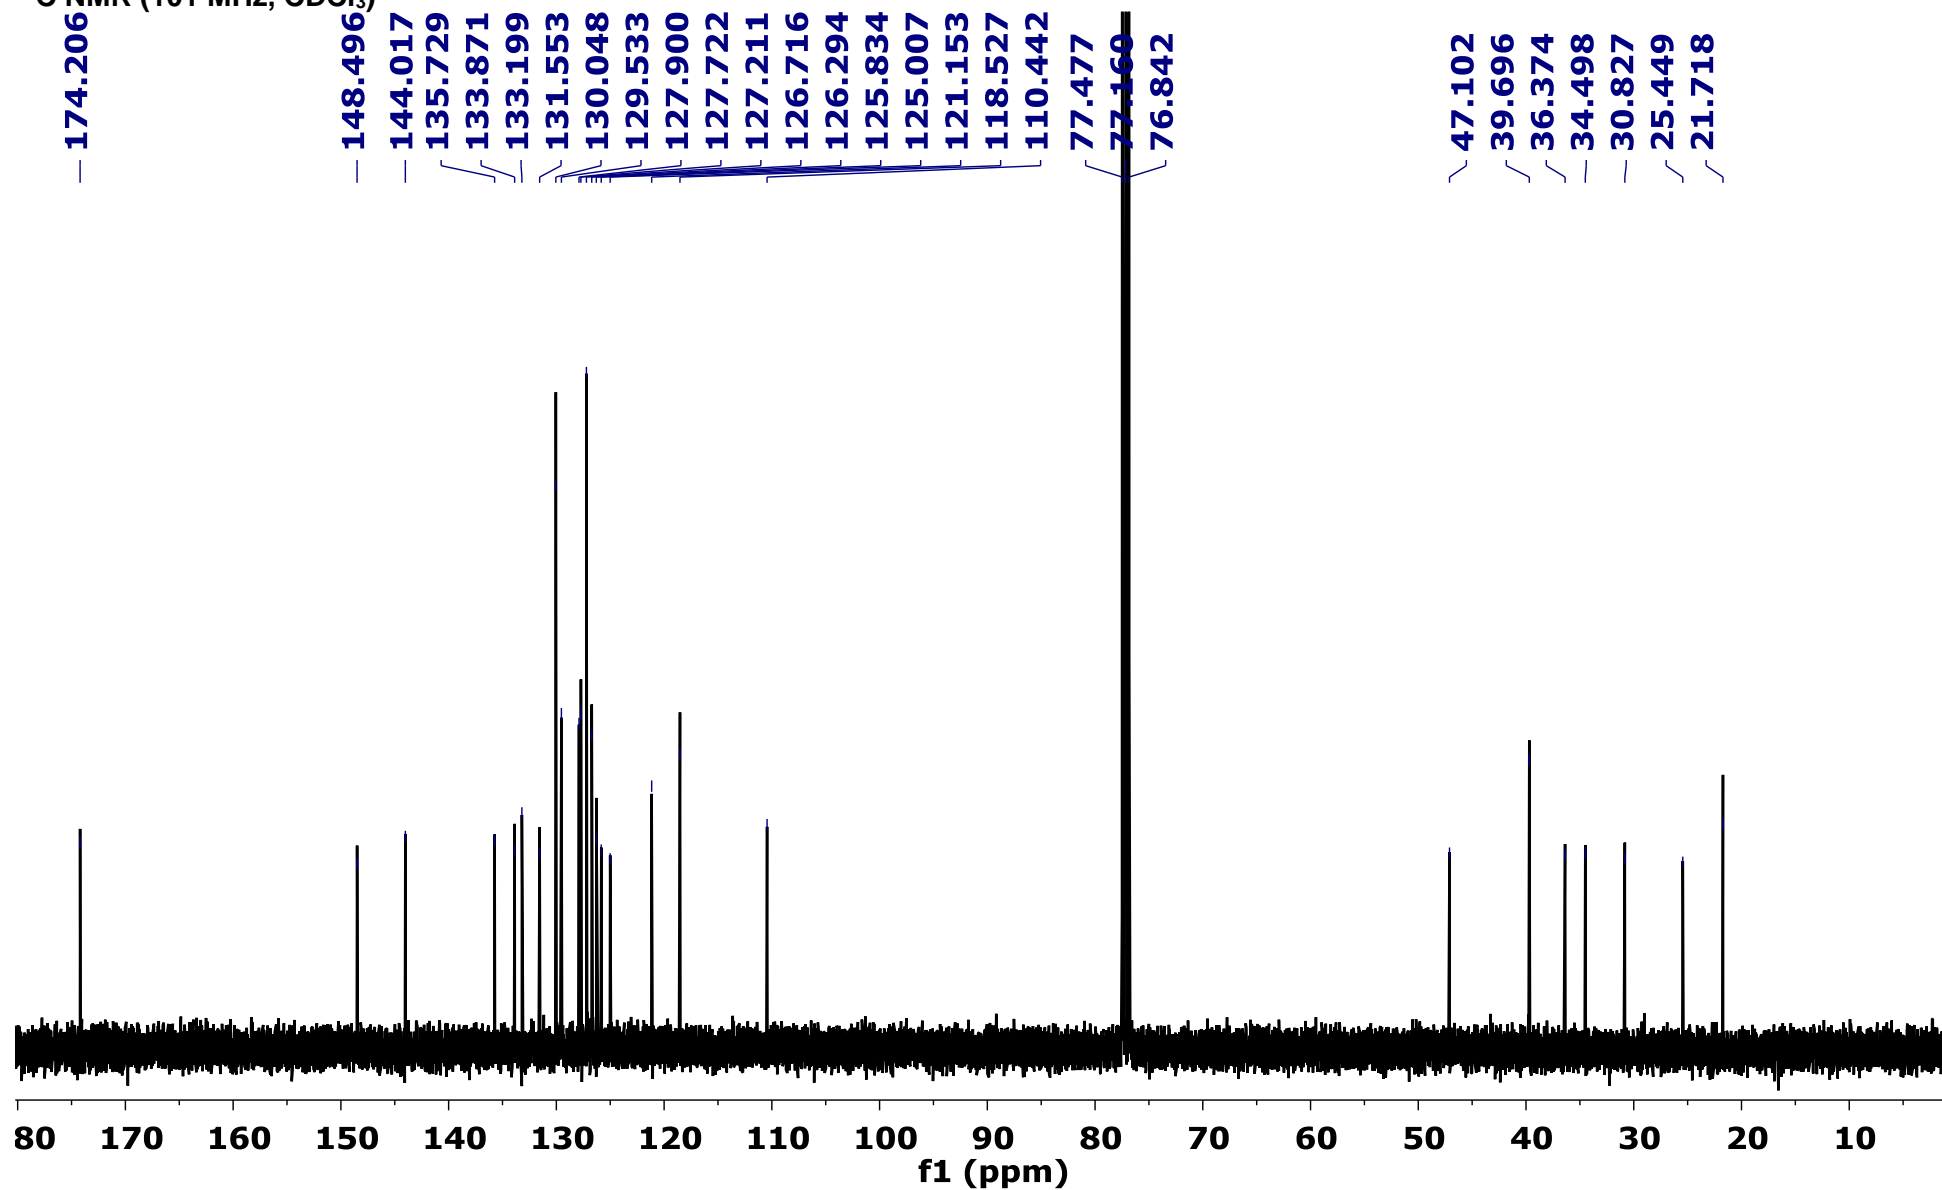



Product 3ag

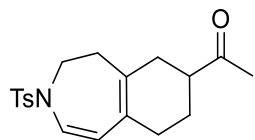

$^1\text{H}$  NMR (400 MHz,  $\text{CDCl}_3$ )

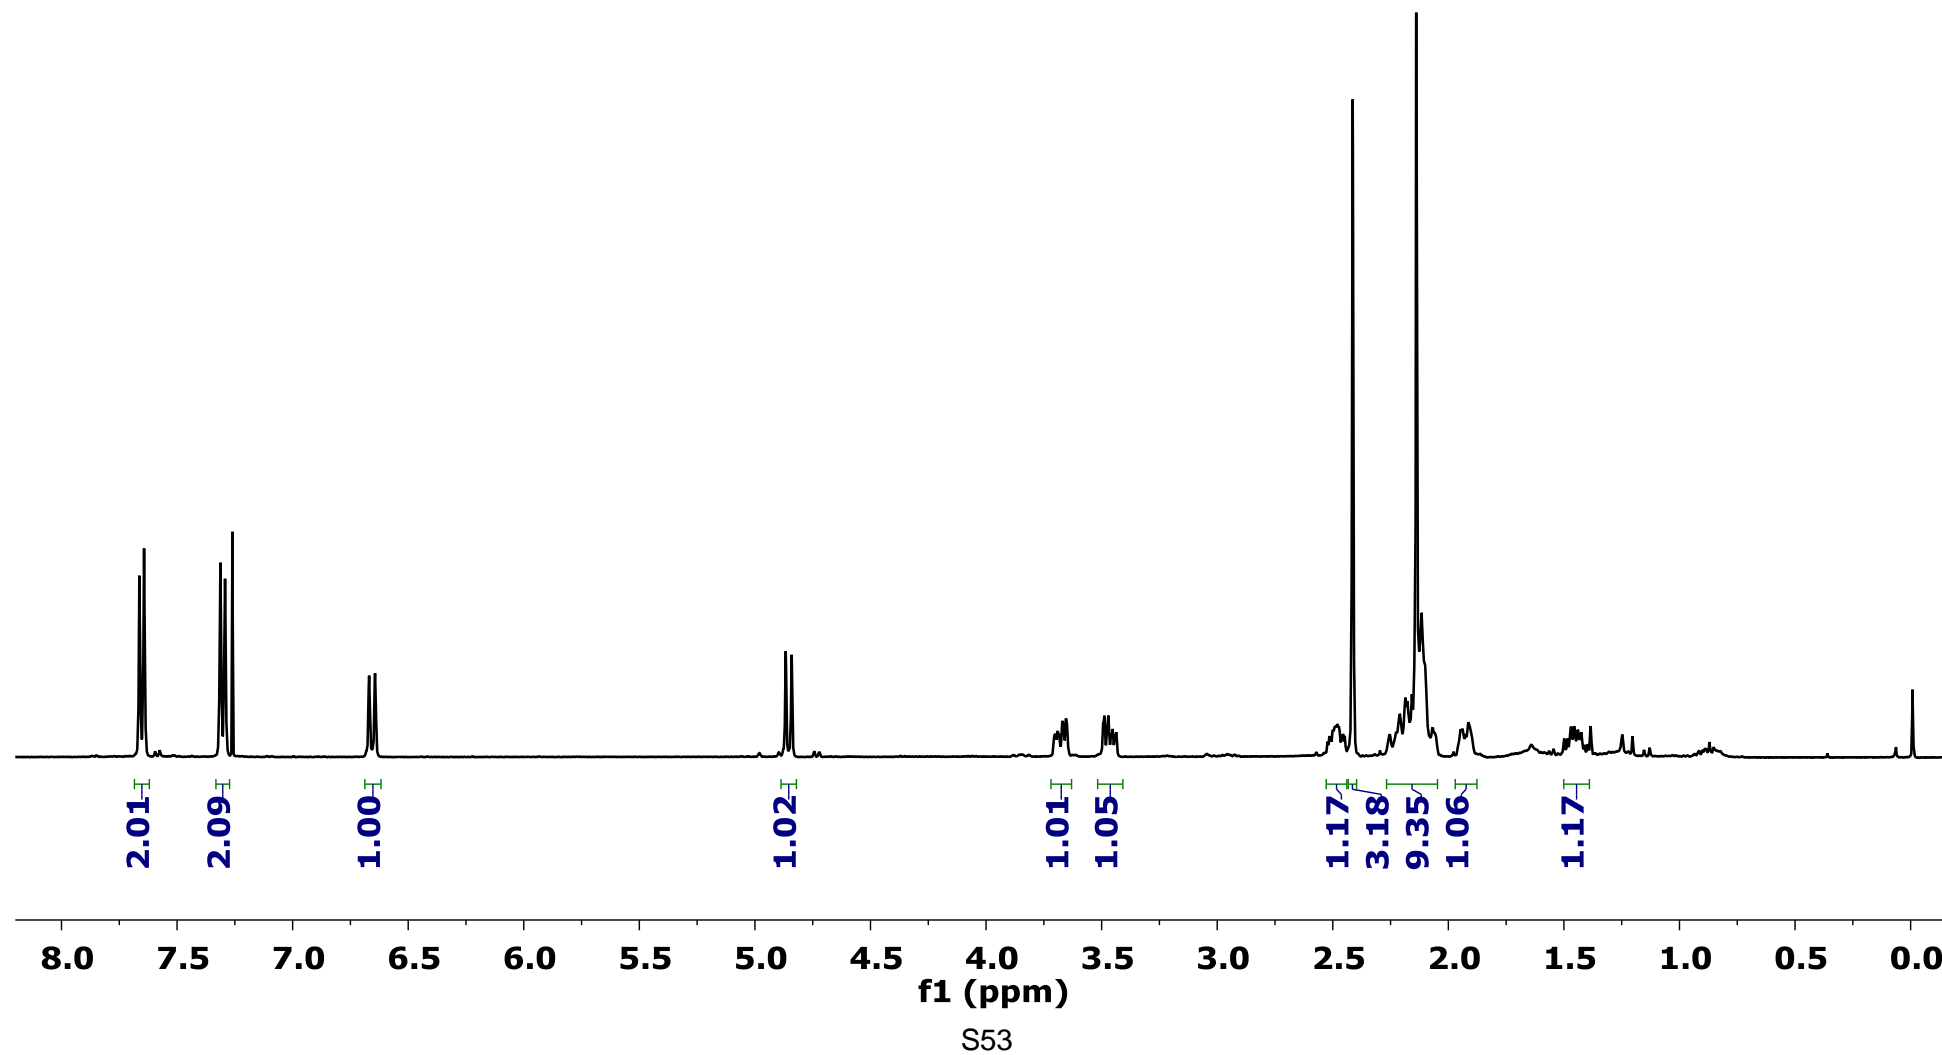

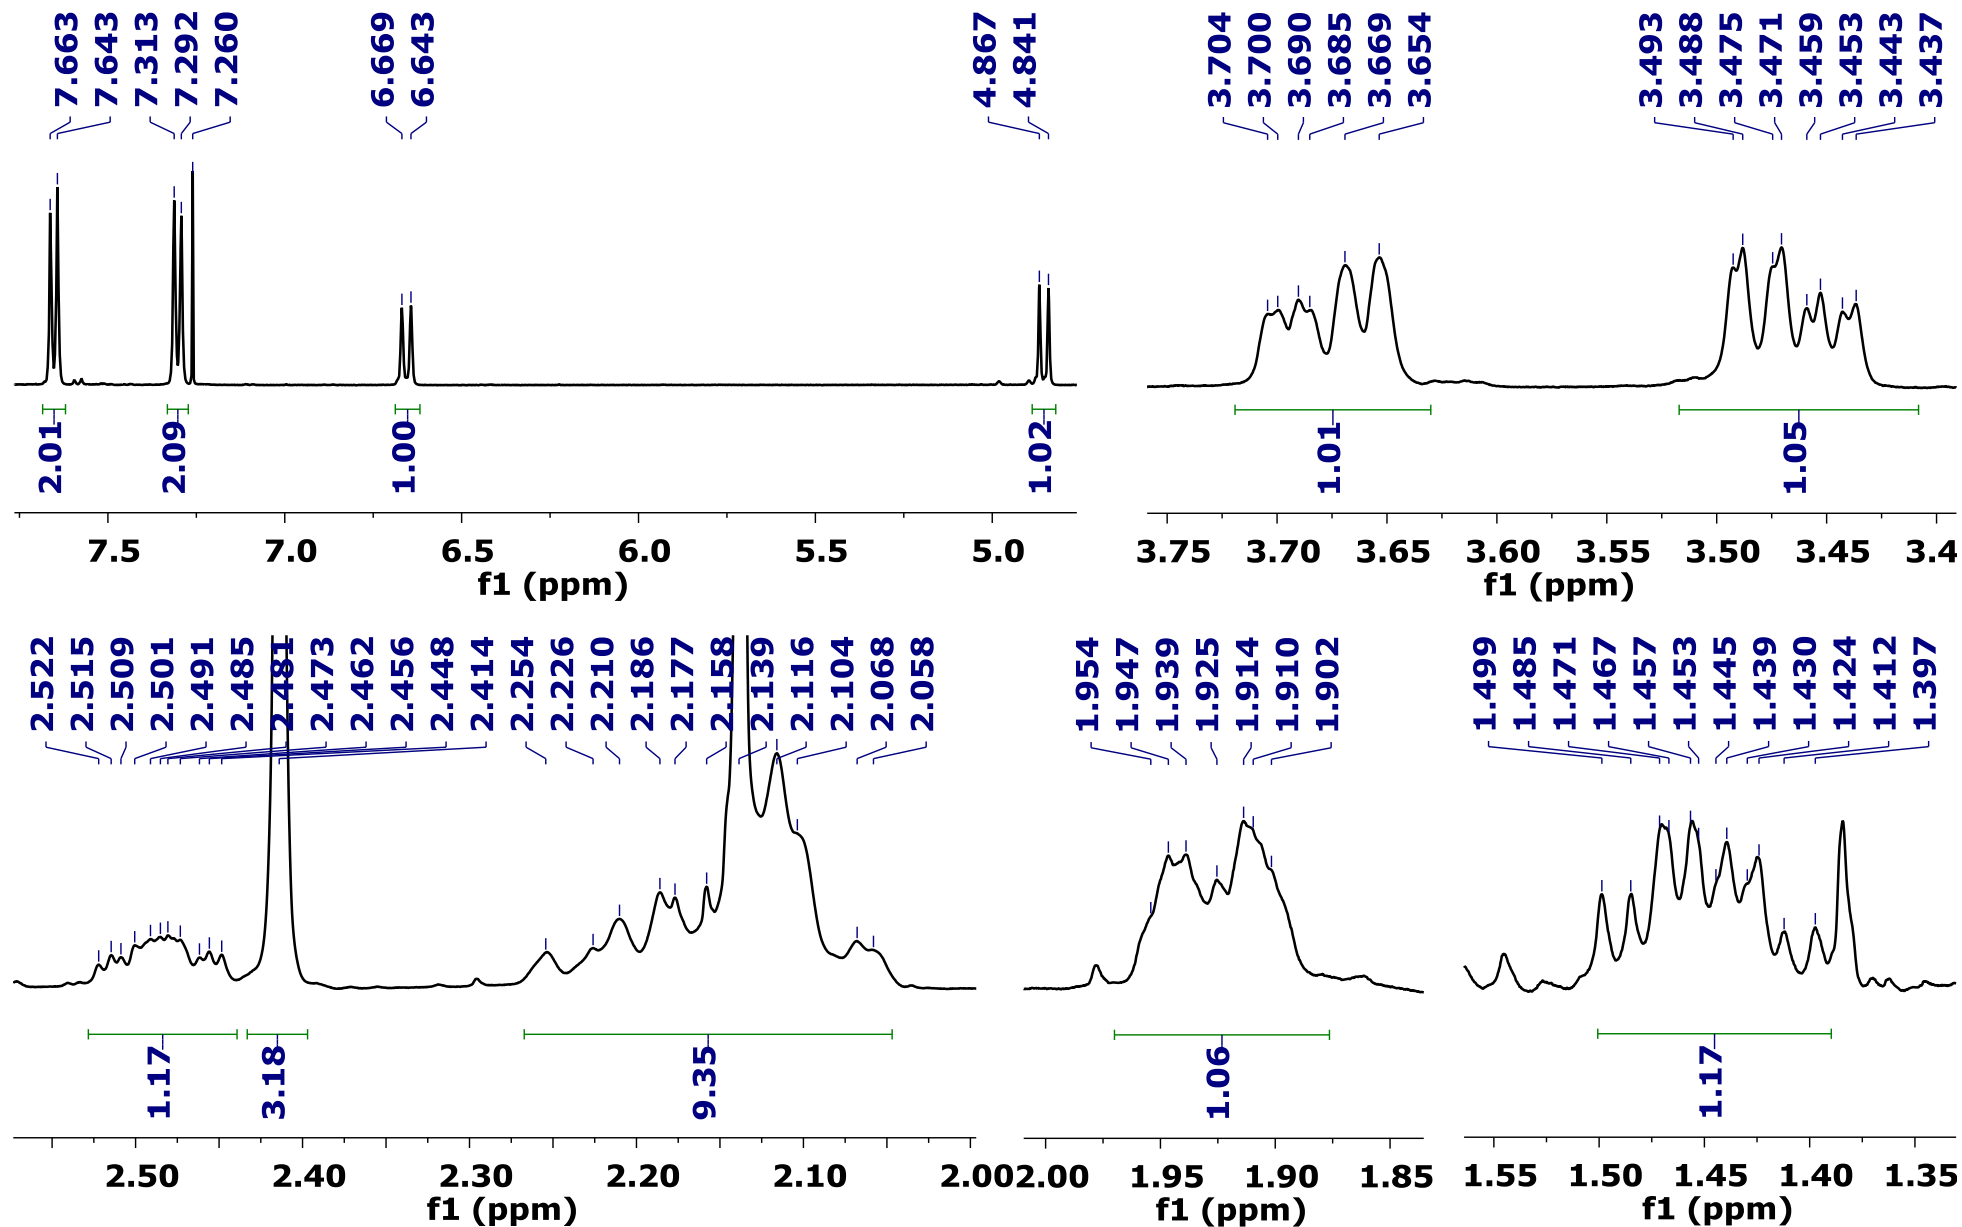

$^{13}\text{C}$  NMR (101 MHz,  $\text{CDCl}_3$ )

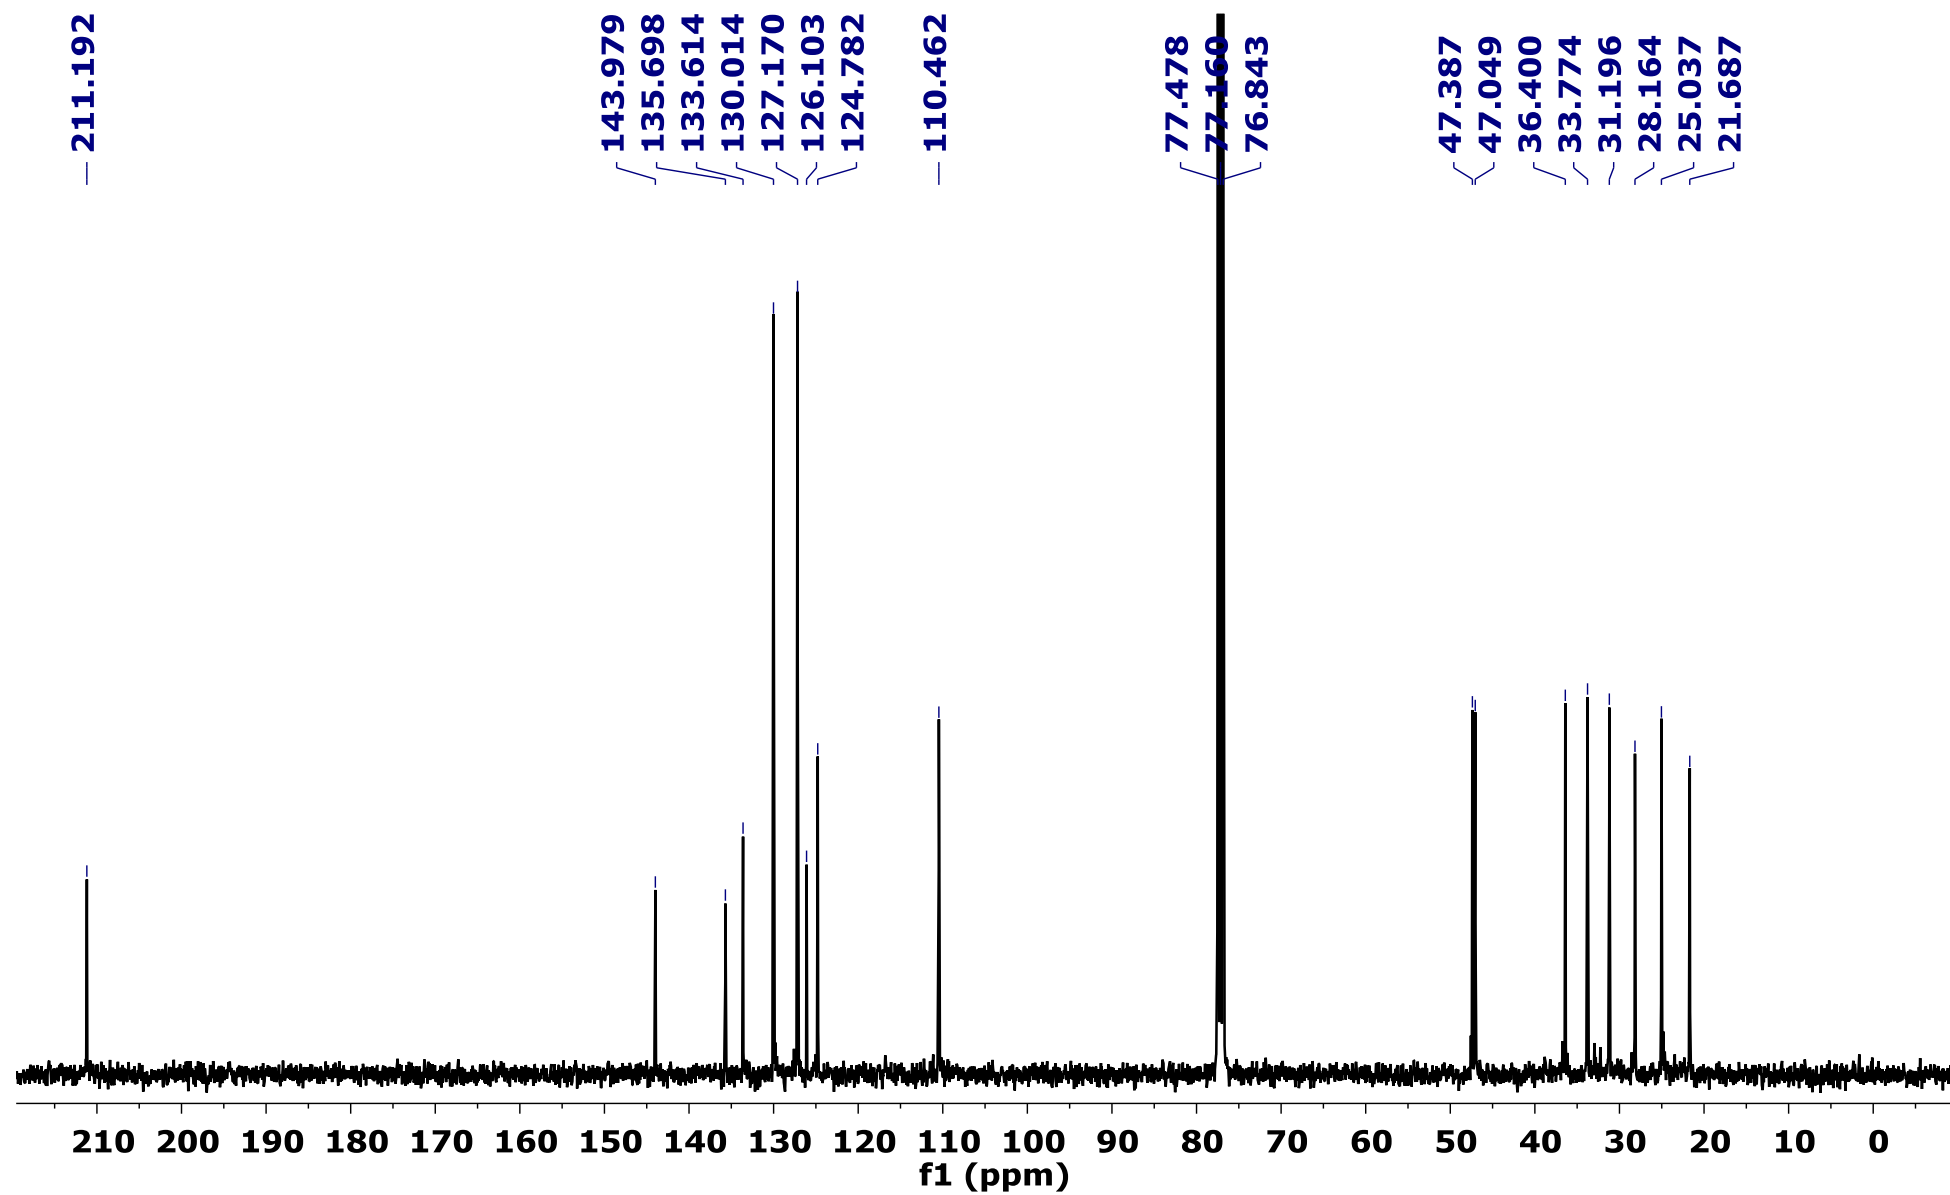

S55

Product 3ah

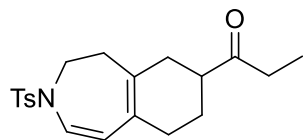

$^1\text{H}$  NMR (400 MHz,  $\text{CDCl}_3$ )

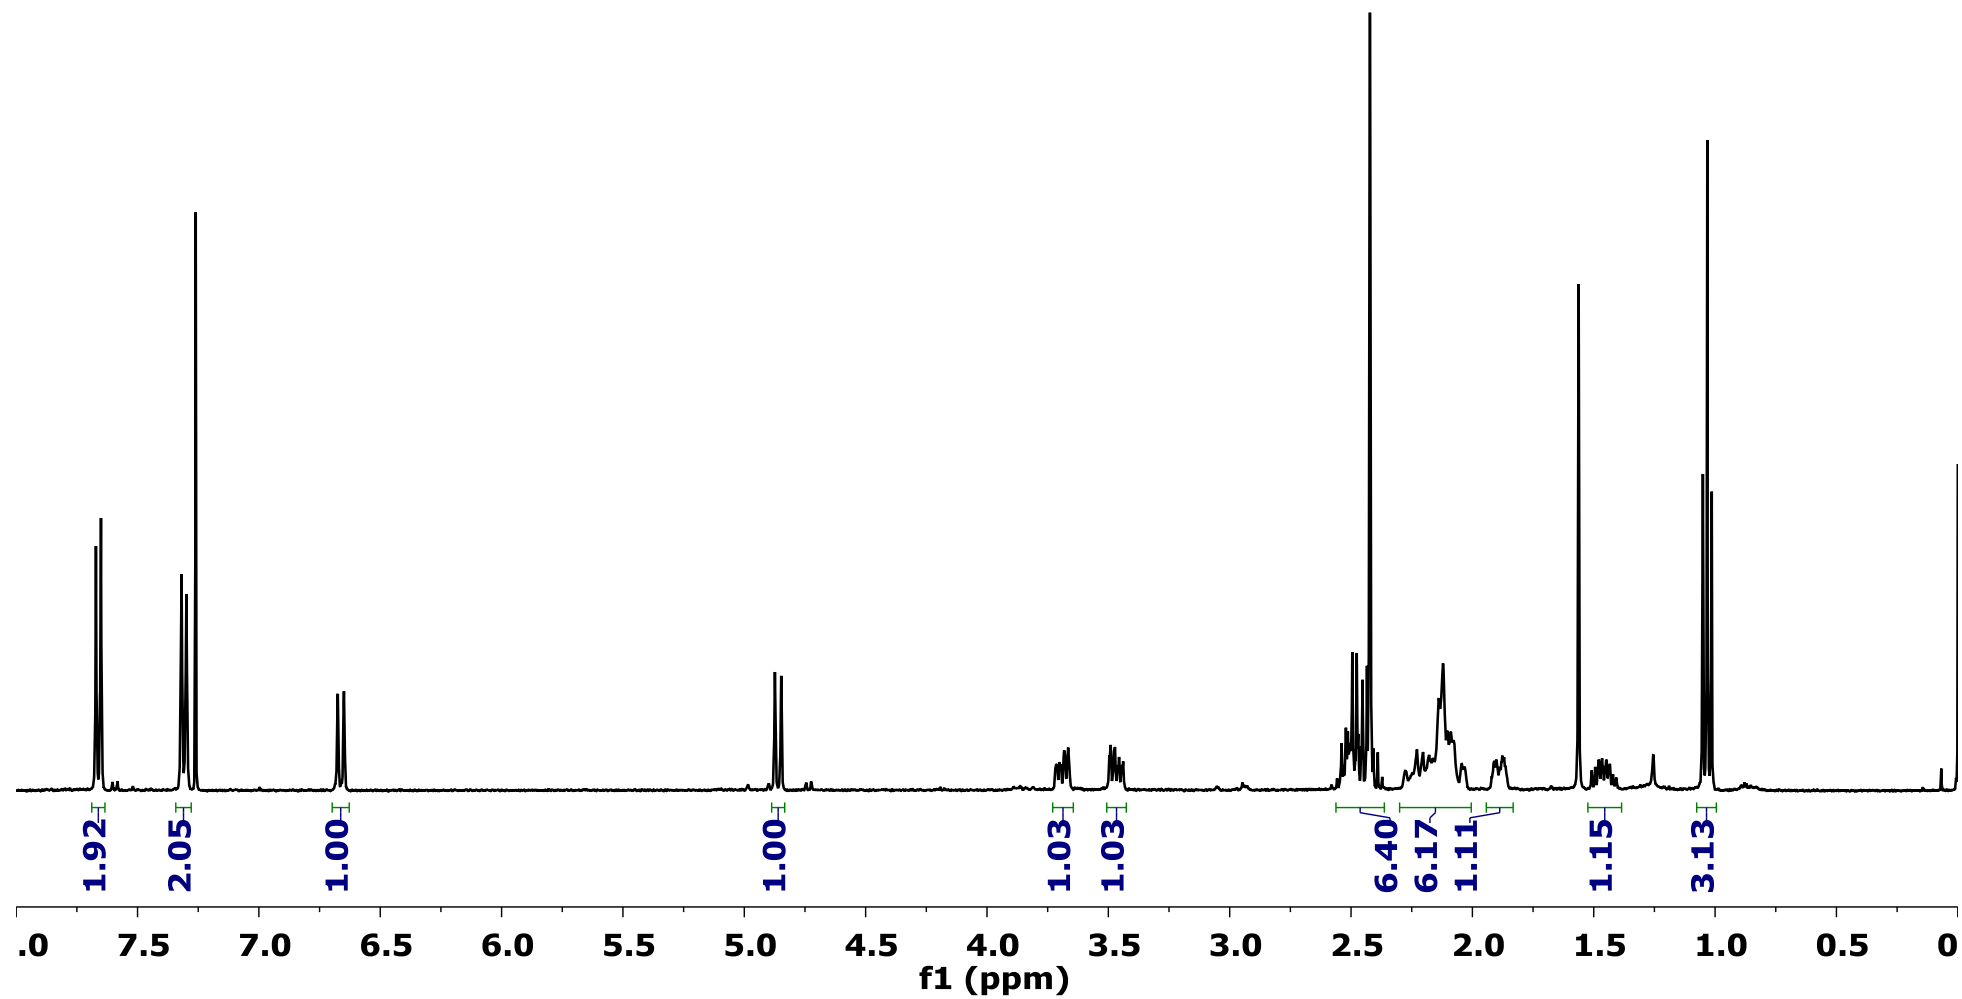

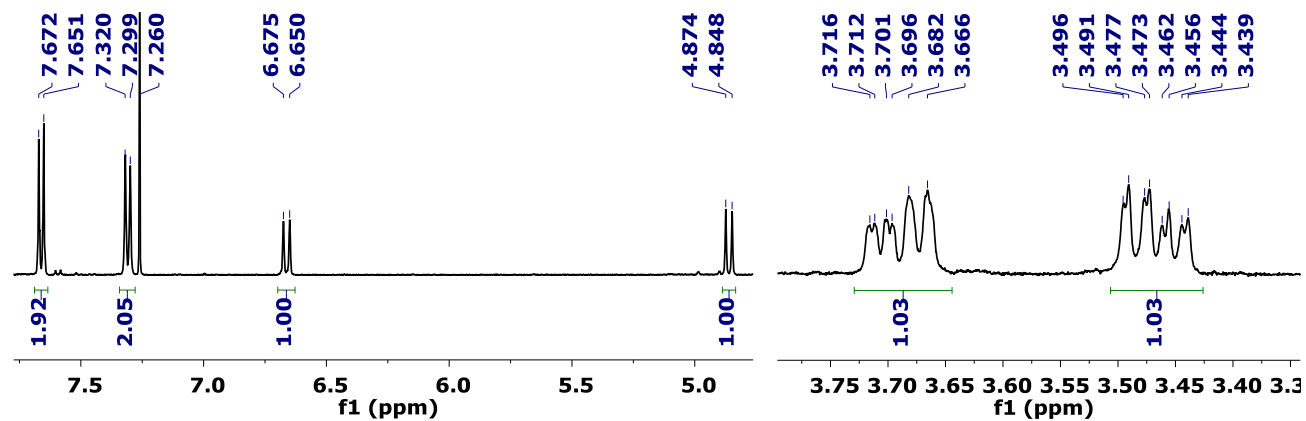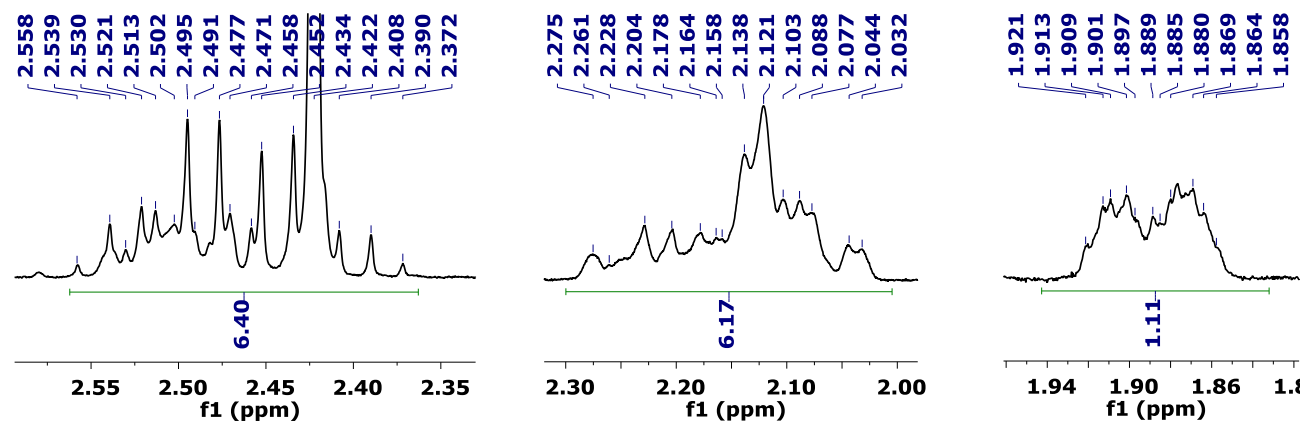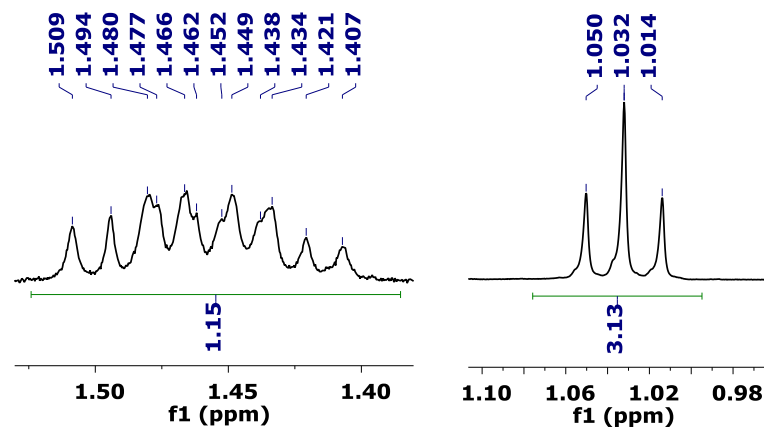

<sup>13</sup>C NMR (101 MHz, CDCl<sub>3</sub>)

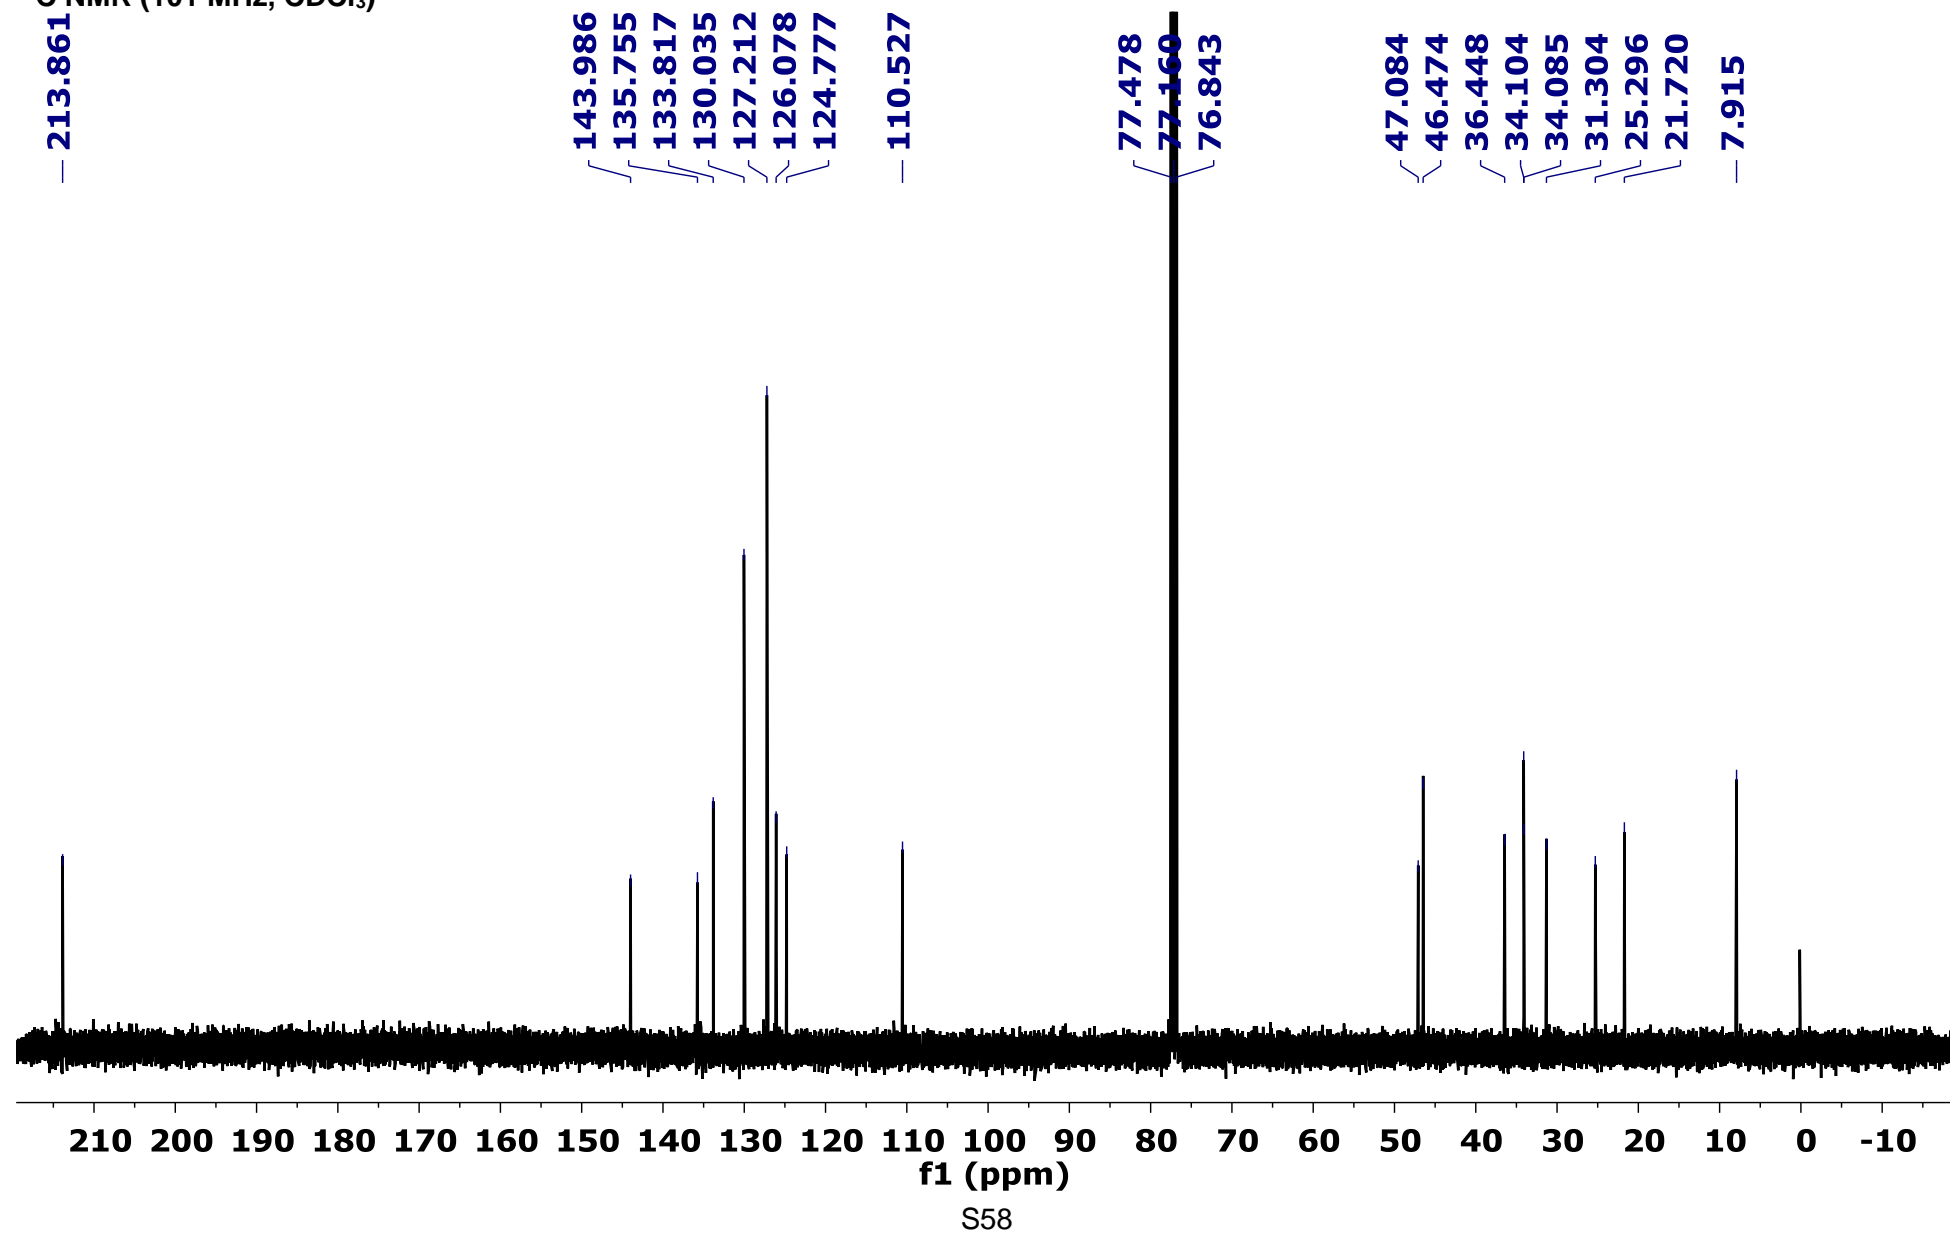

Product 3ai

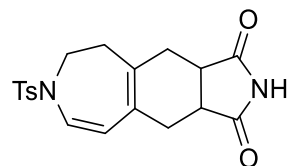

$^1\text{H}$  NMR (400 MHz,  $\text{CDCl}_3$ )

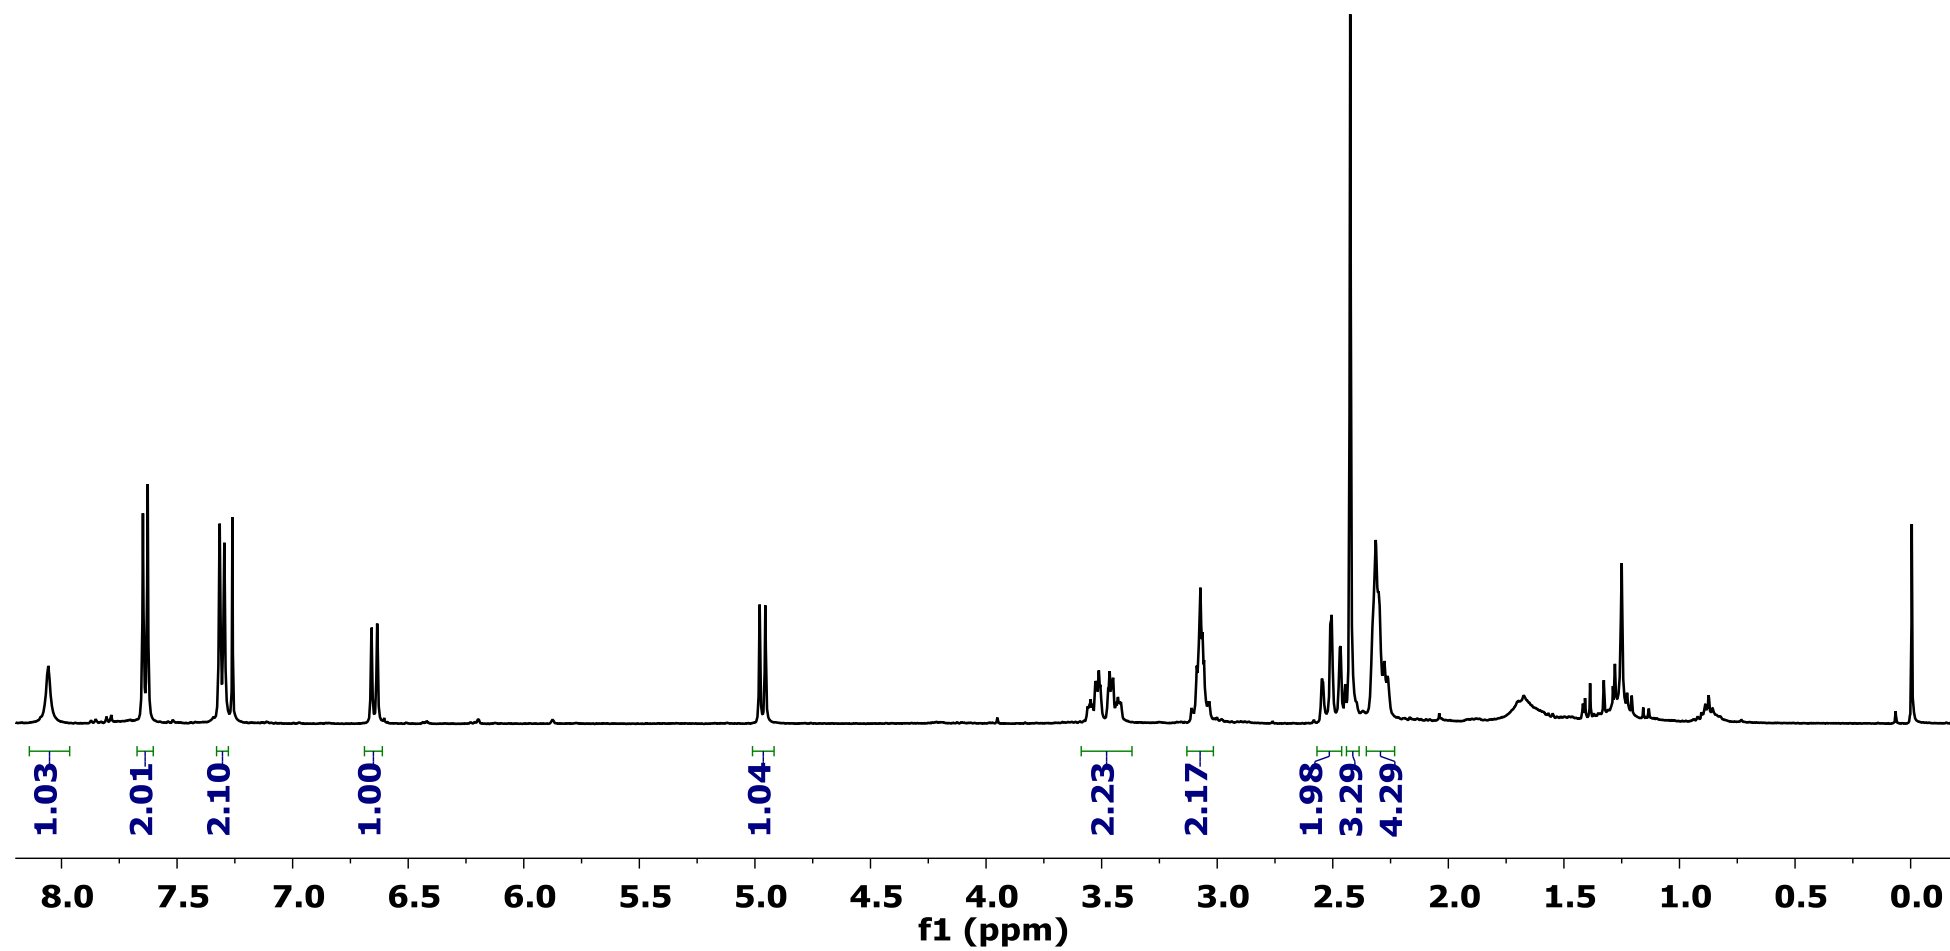

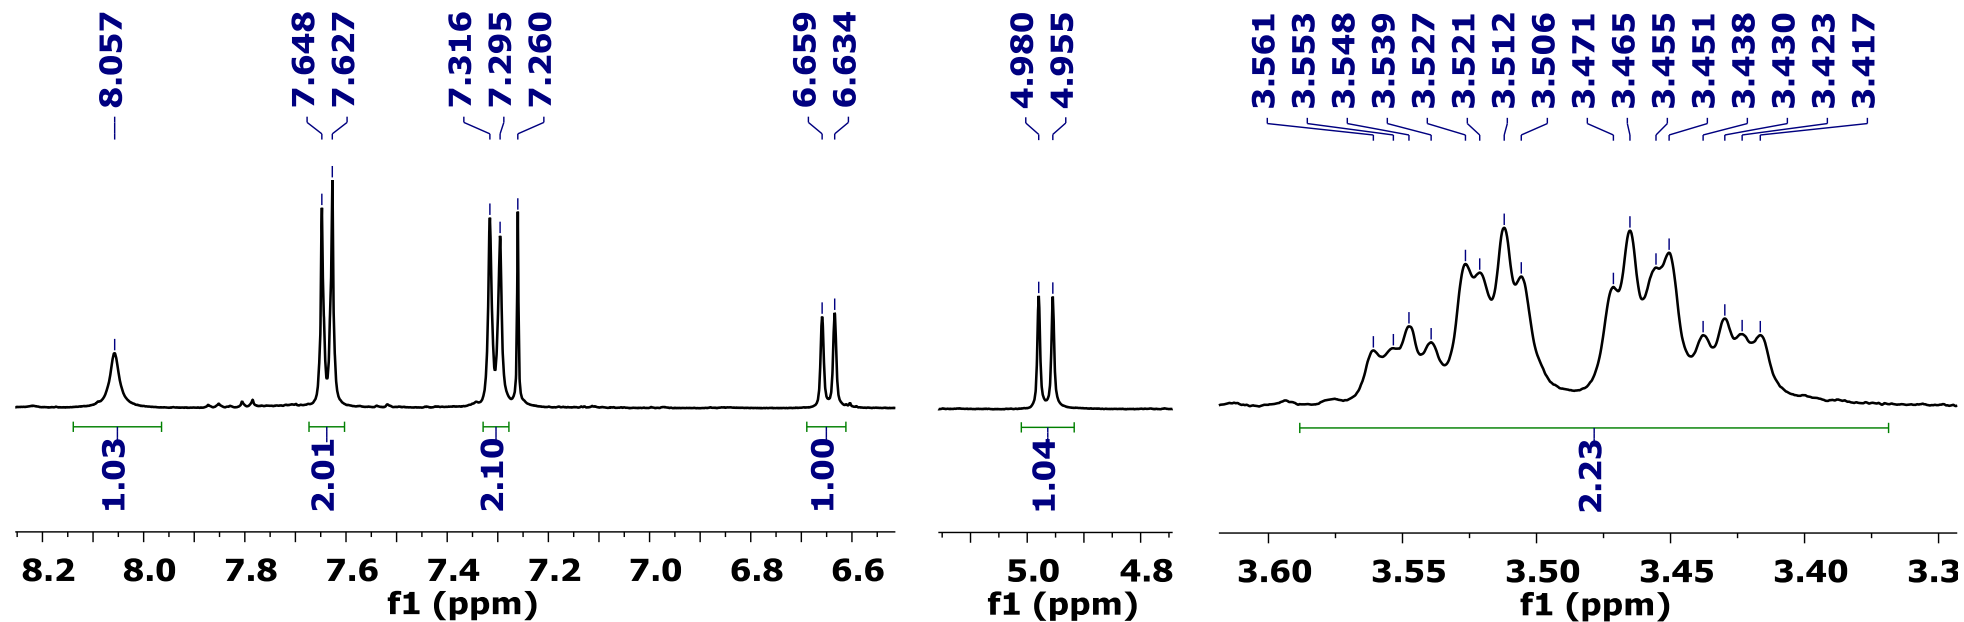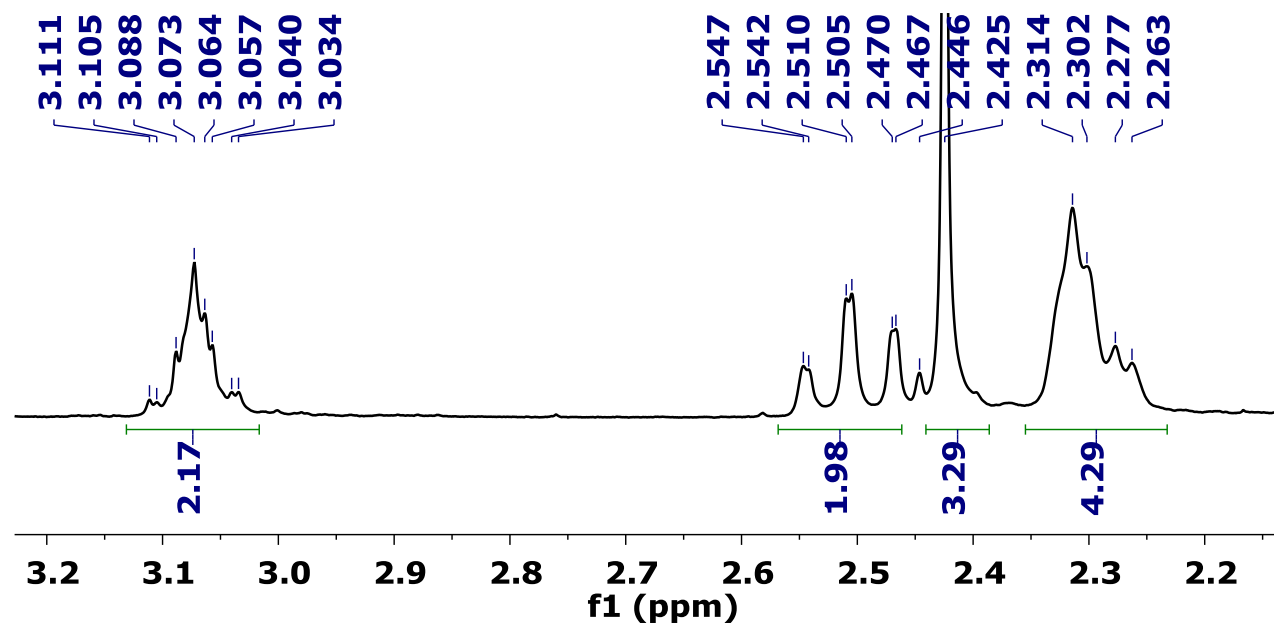



<sup>13</sup>C NMR (101 MHz, CDCl<sub>3</sub>)

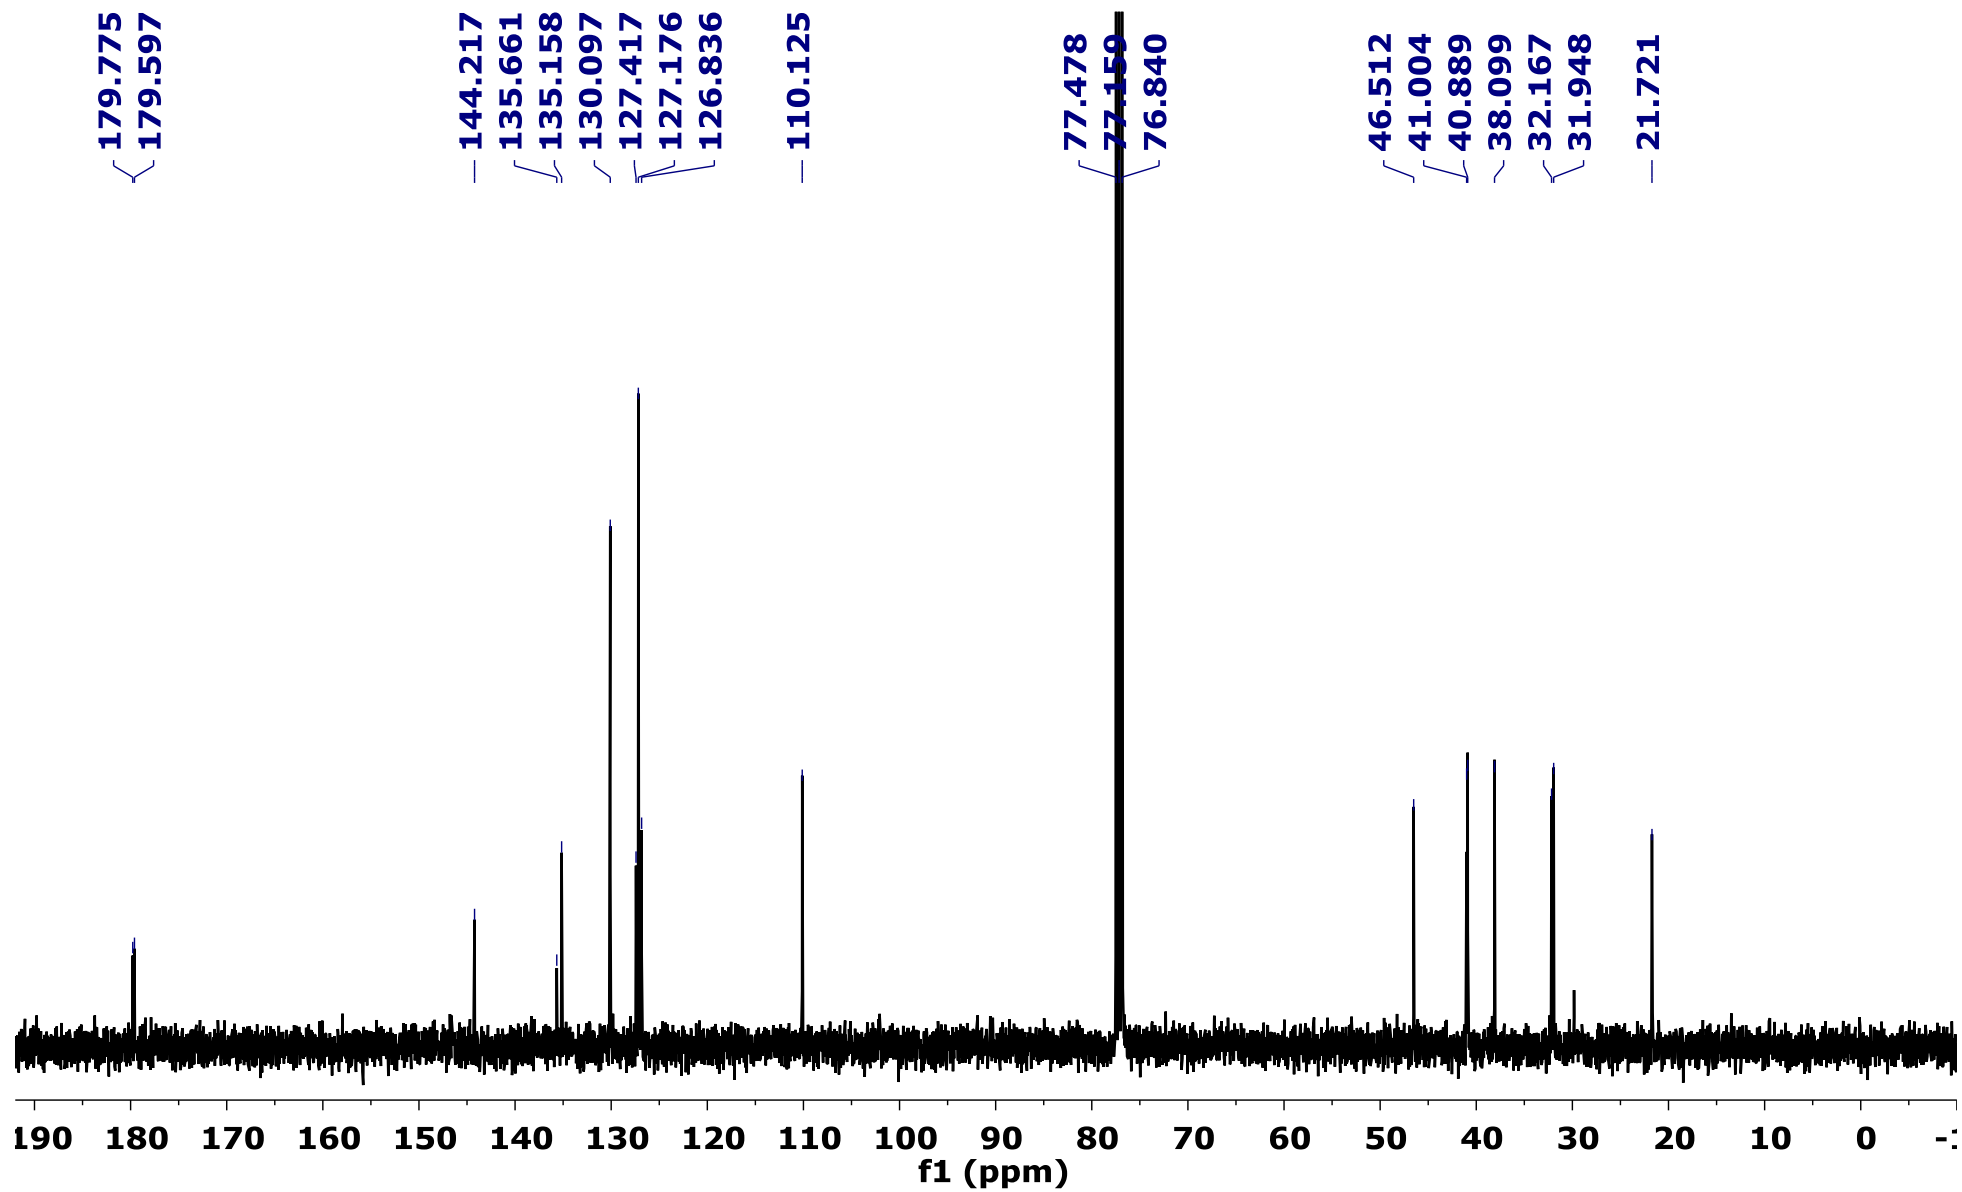

Product 3aj

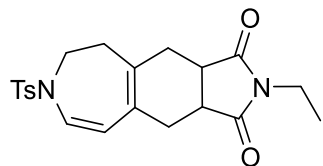

$^1\text{H}$  NMR (400 MHz,  $\text{CDCl}_3$ )

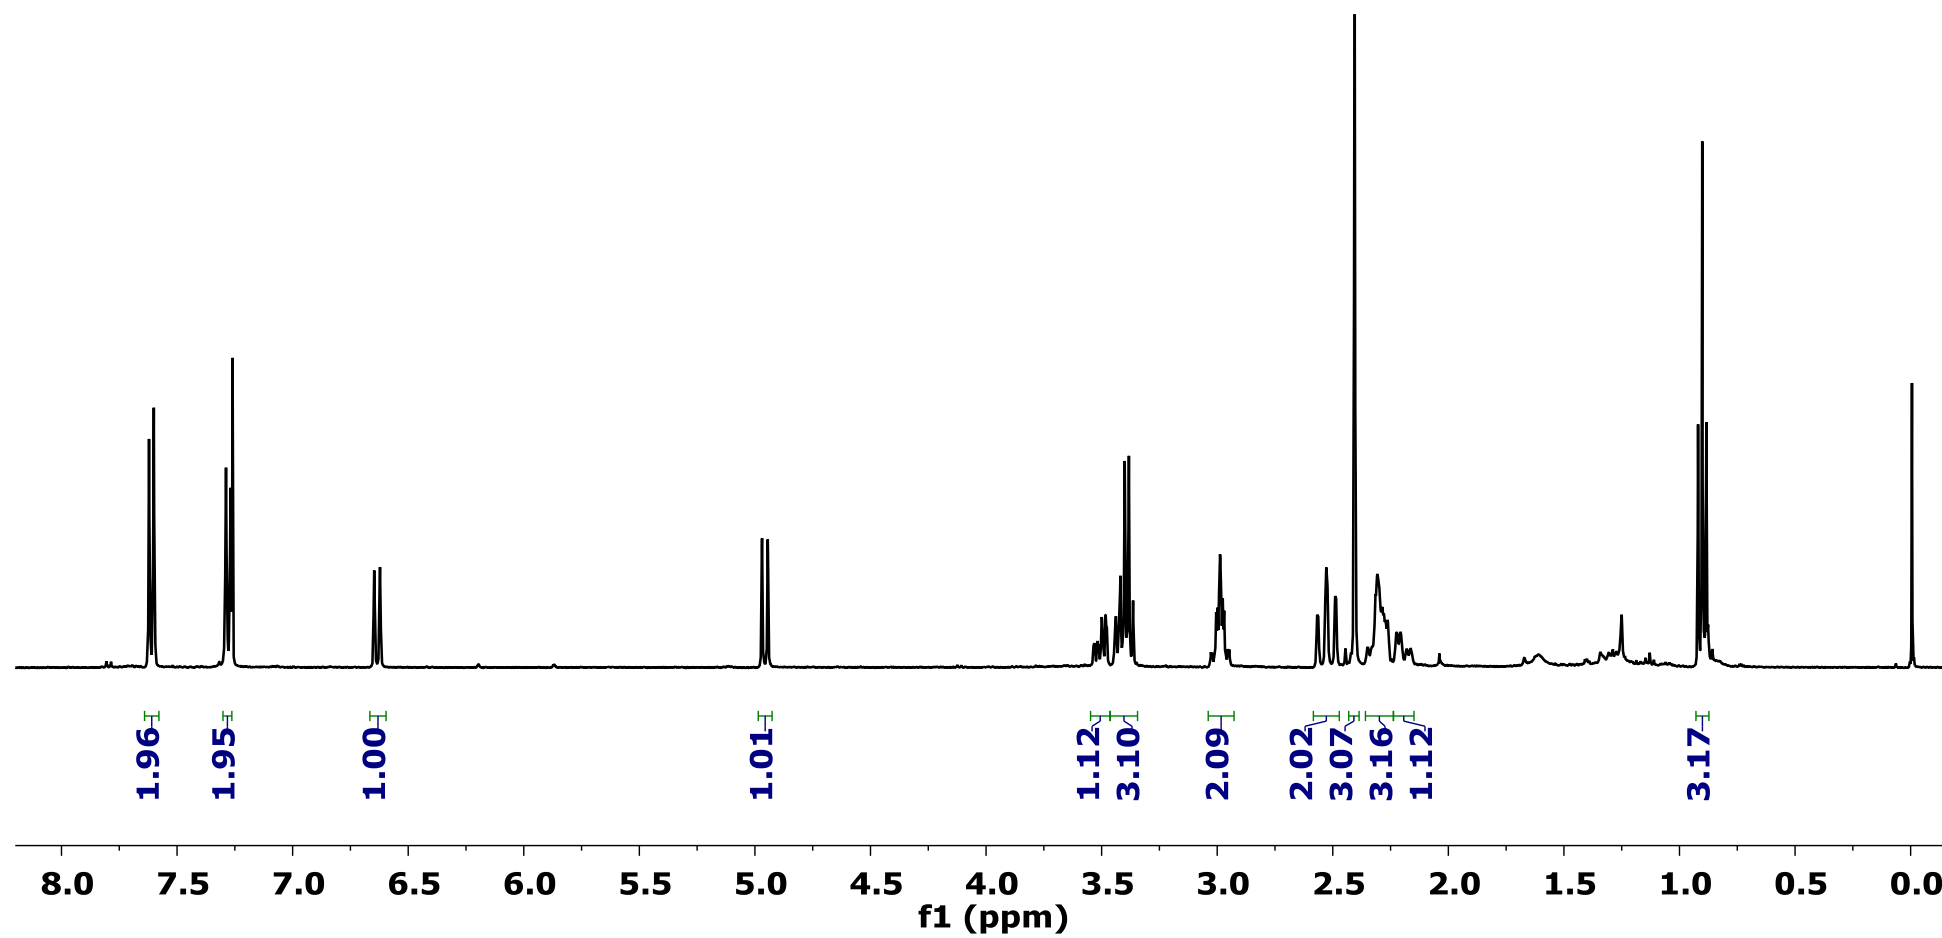

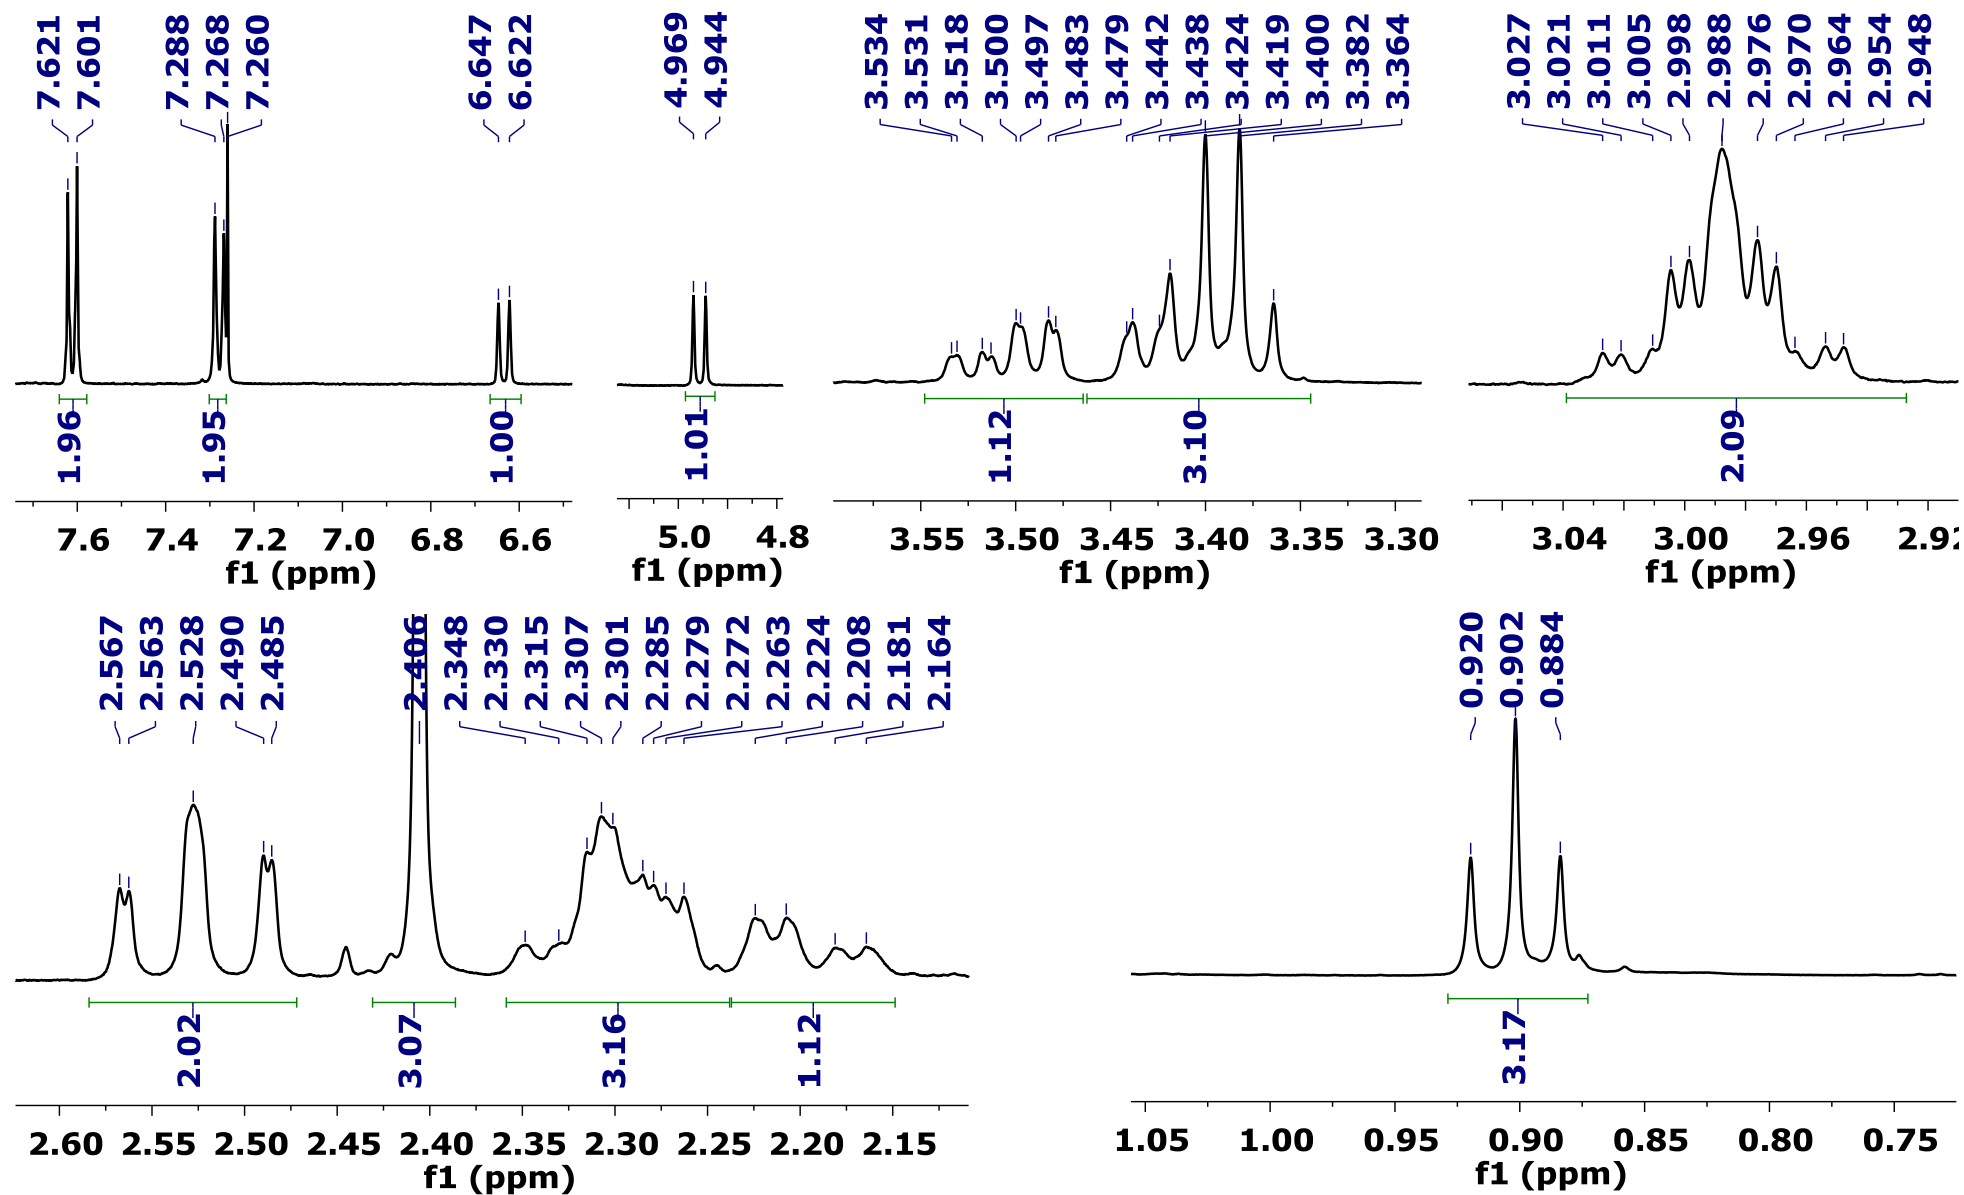

<sup>13</sup>C NMR (101 MHz, CDCl<sub>3</sub>)

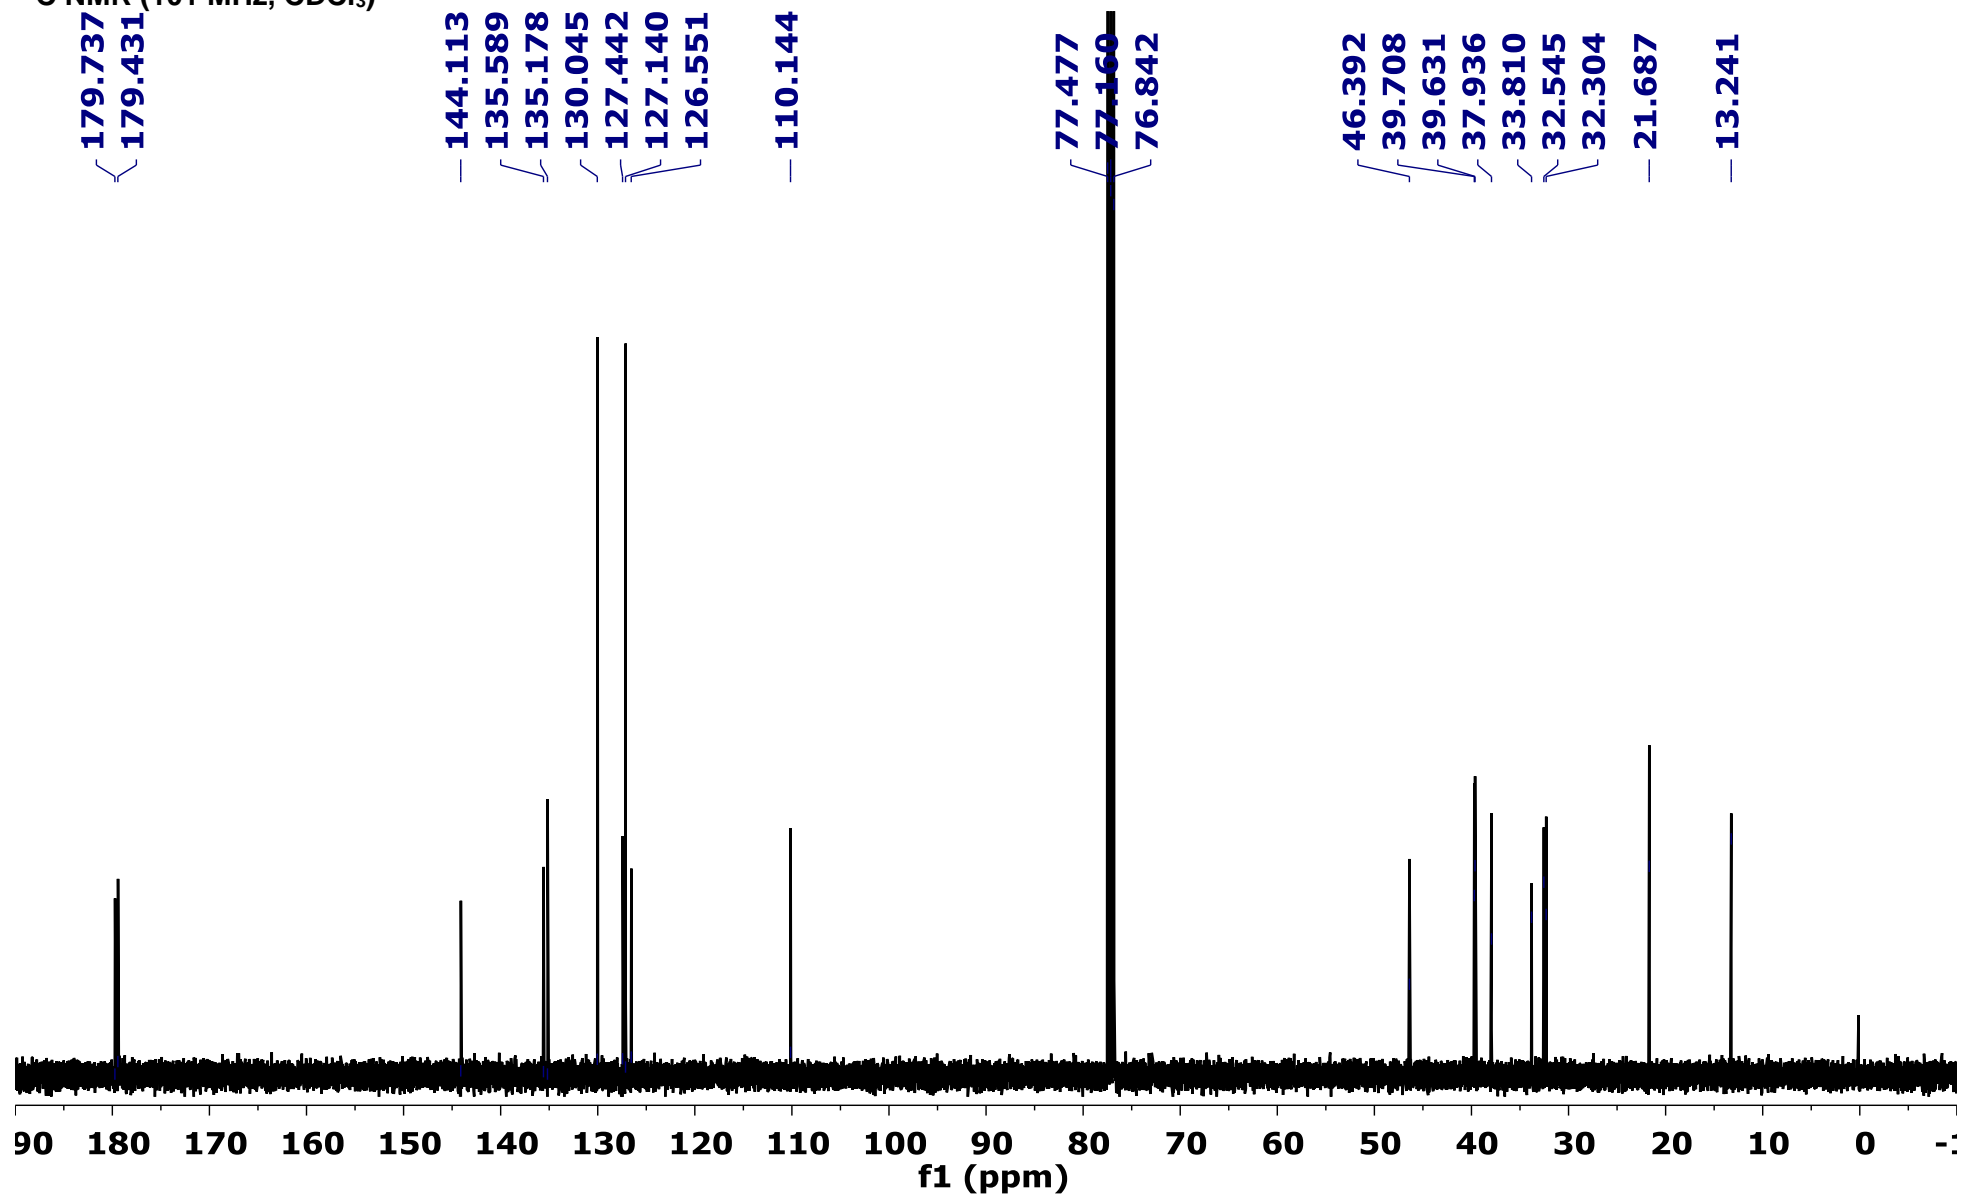

Product 3ak

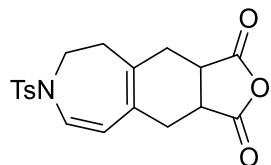

$^1\text{H}$  NMR (400 MHz,  $\text{CDCl}_3$ )

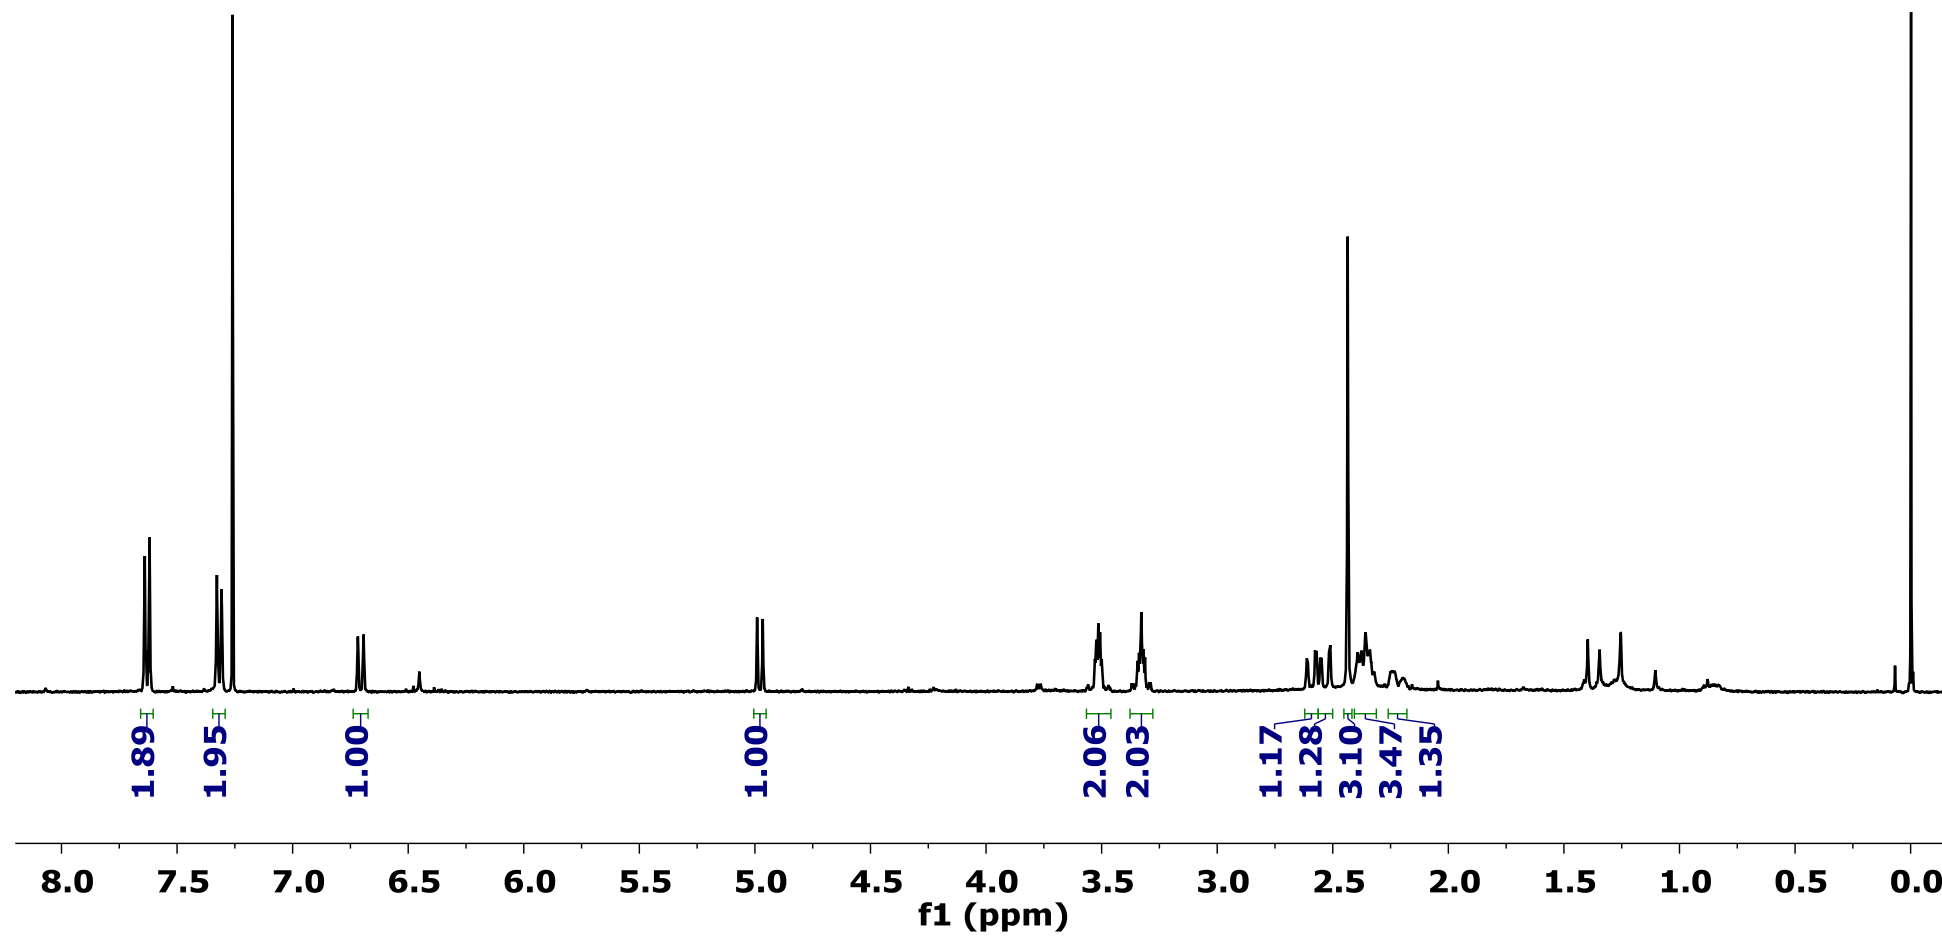

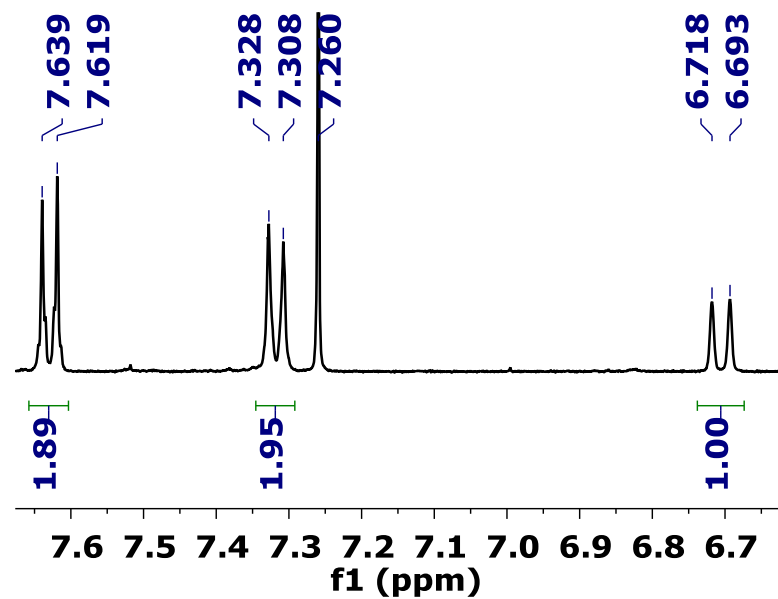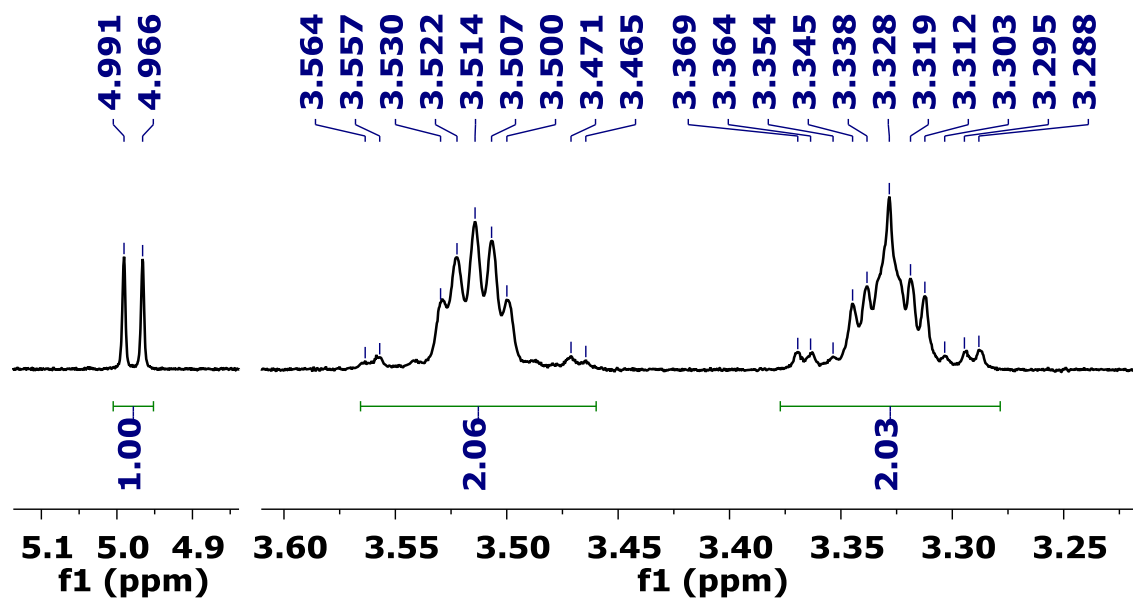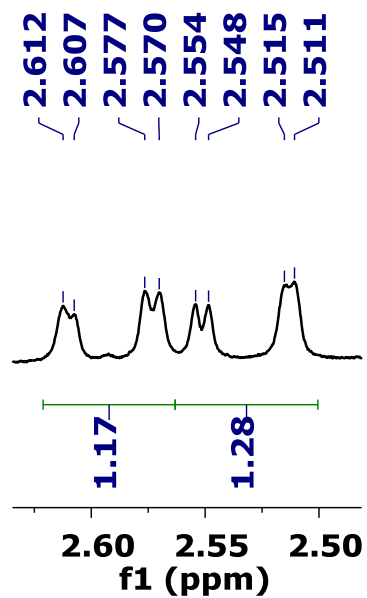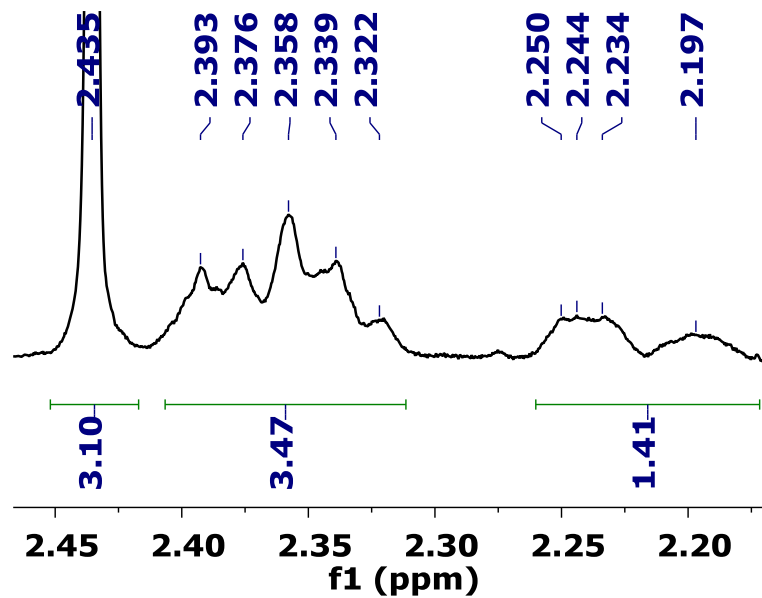

<sup>13</sup>C NMR (101 MHz, CDCl<sub>3</sub>)

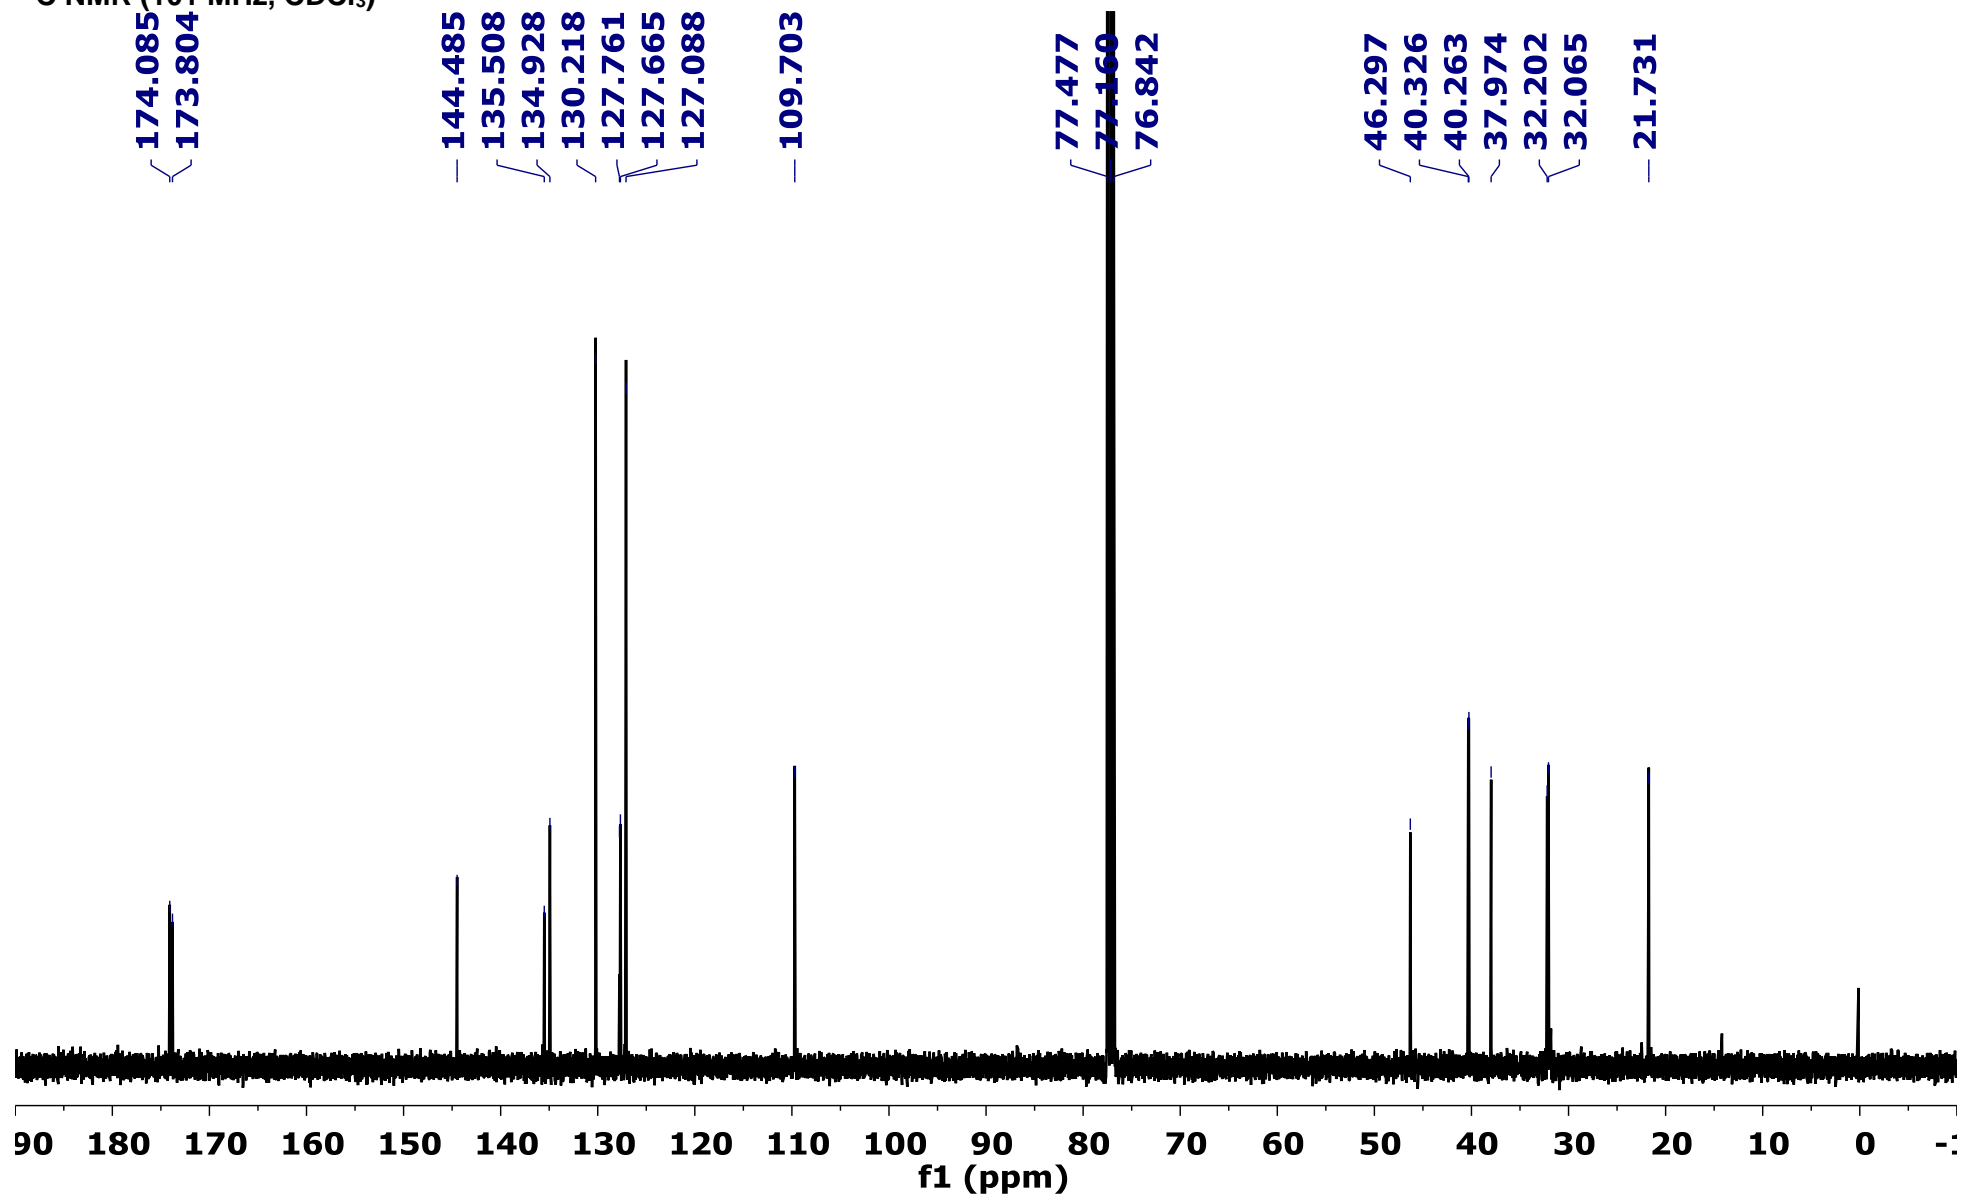

Product 3al

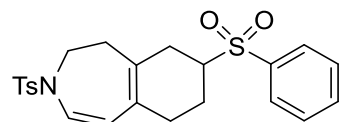

$^1\text{H}$  NMR (400 MHz,  $\text{CDCl}_3$ )

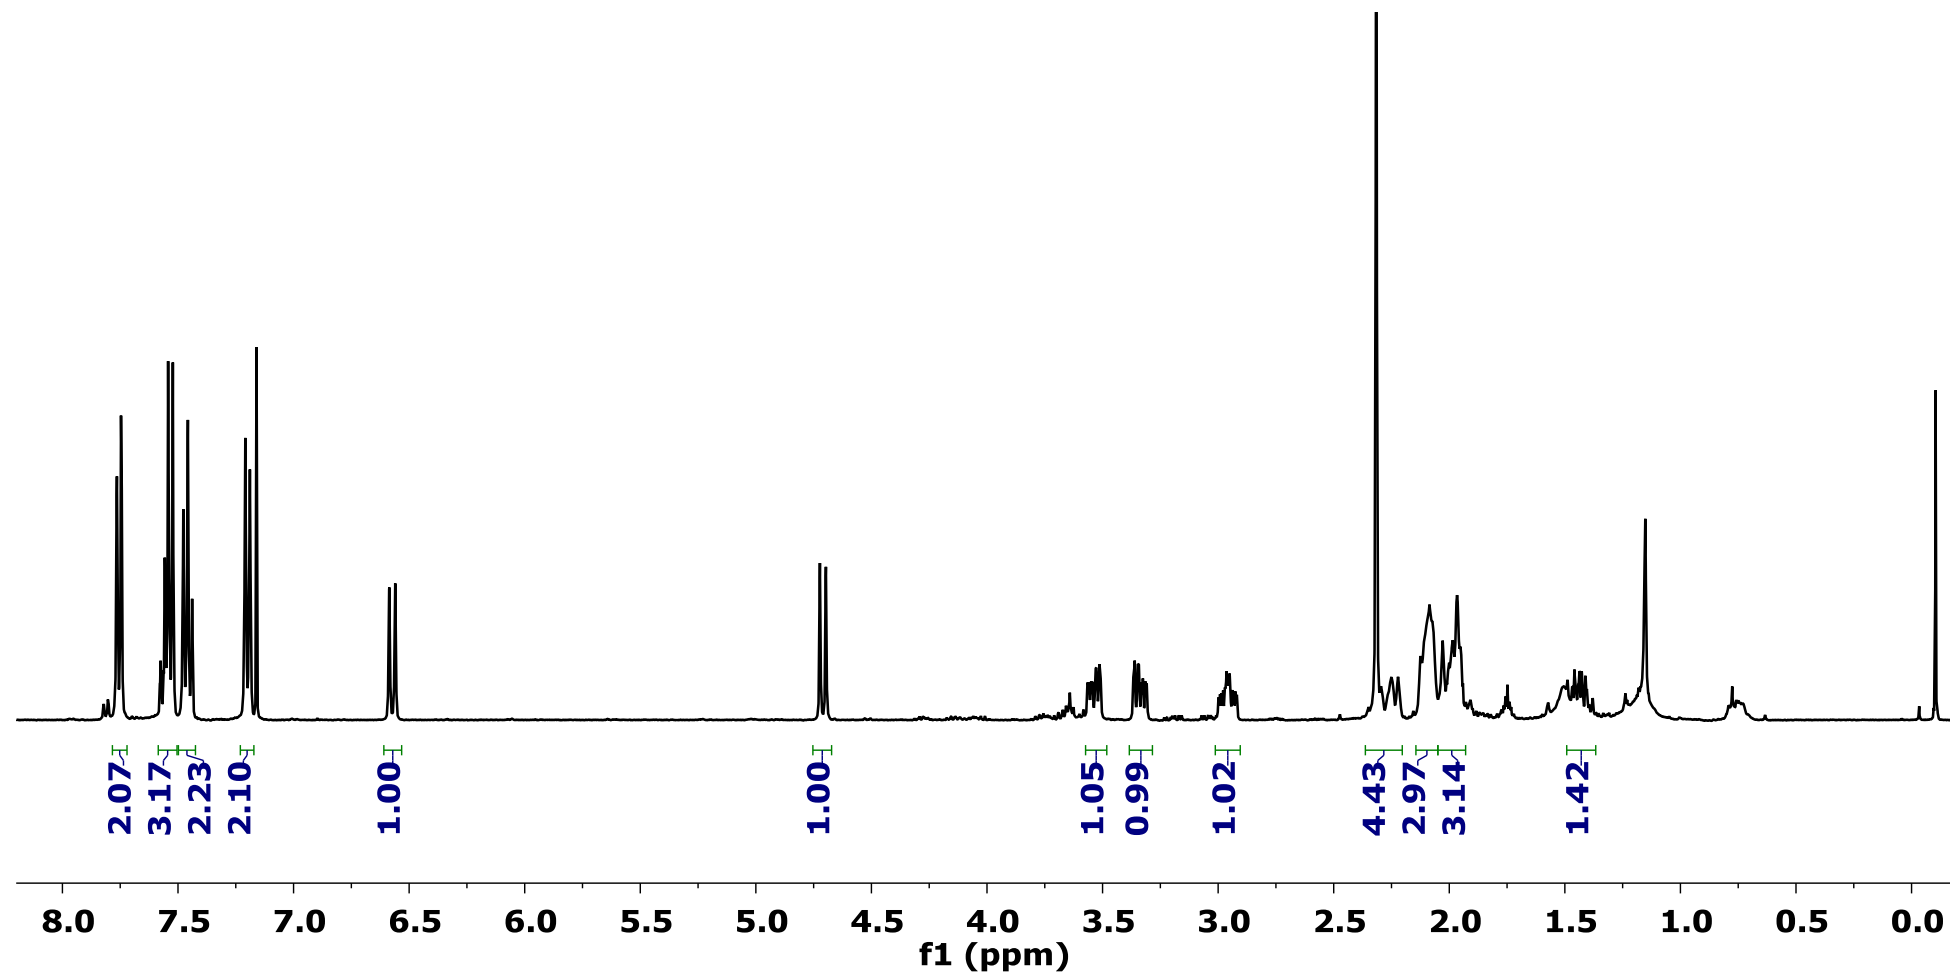



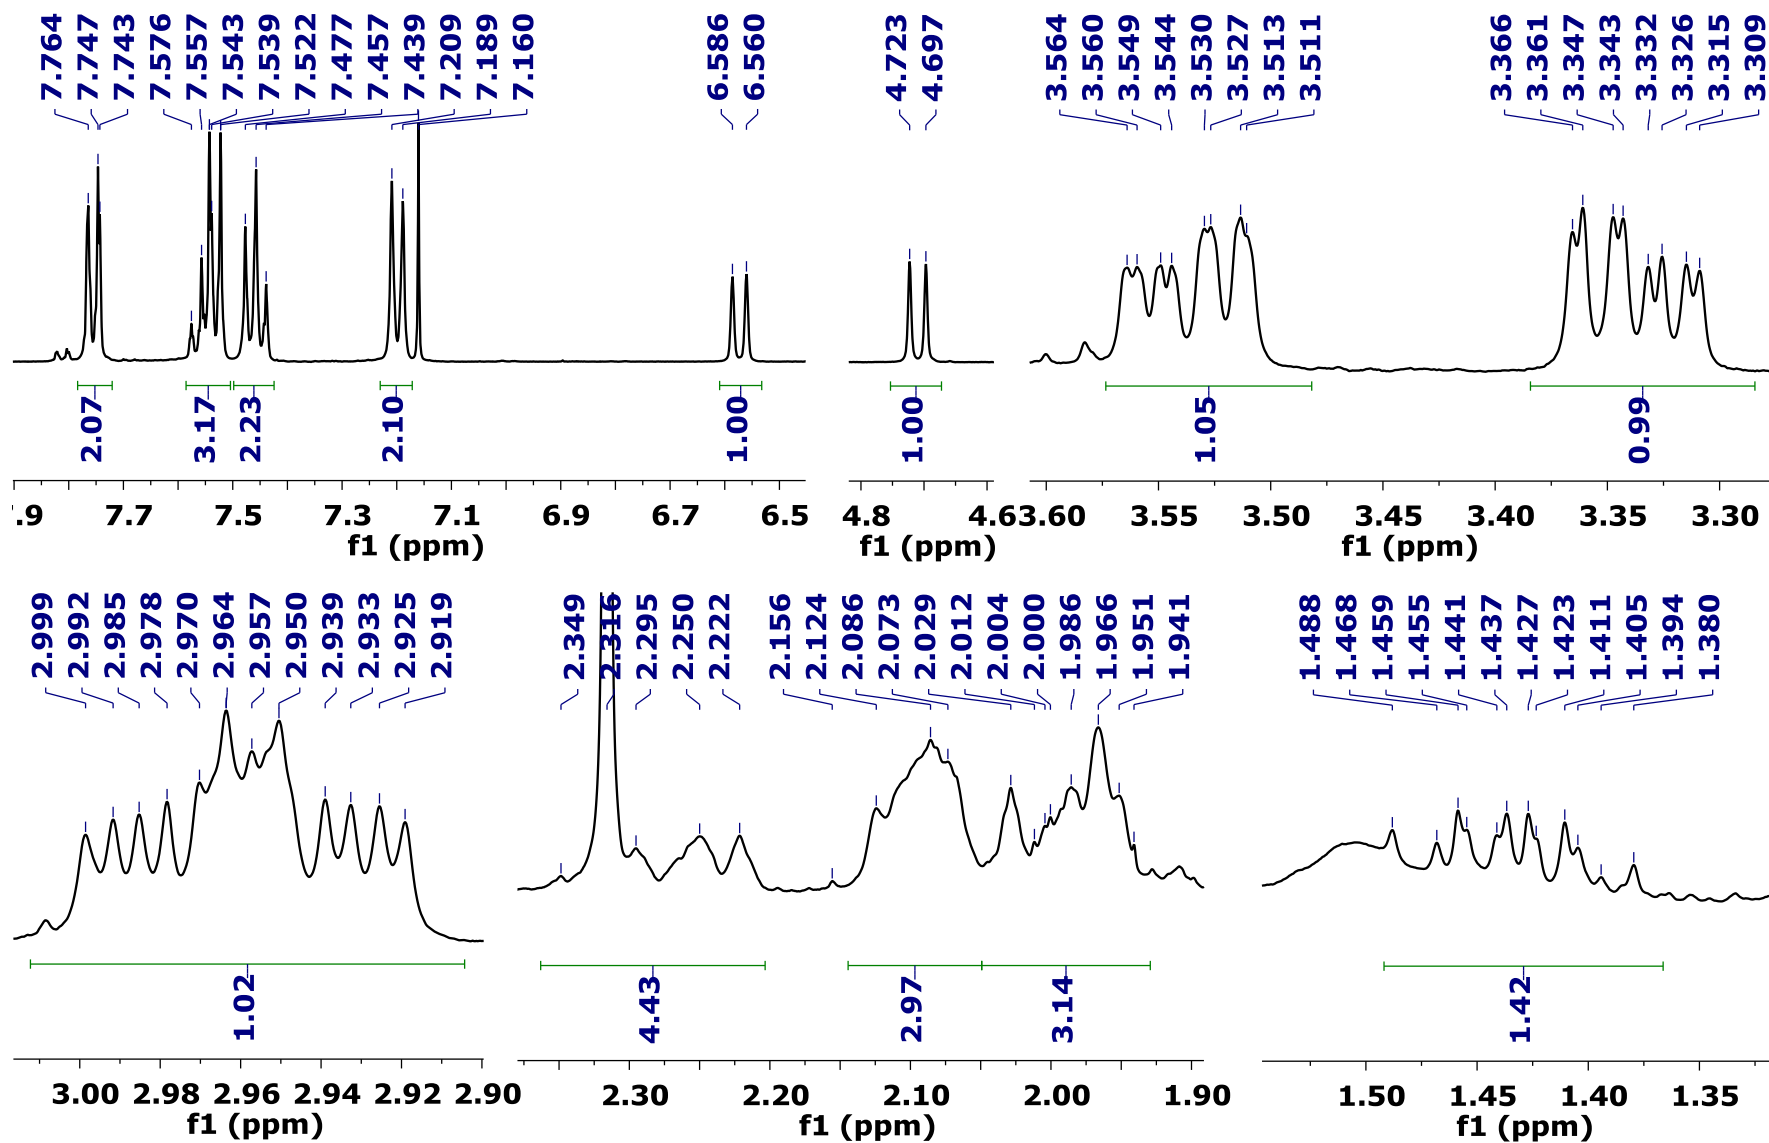

<sup>13</sup>C NMR (101 MHz, CDCl<sub>3</sub>)

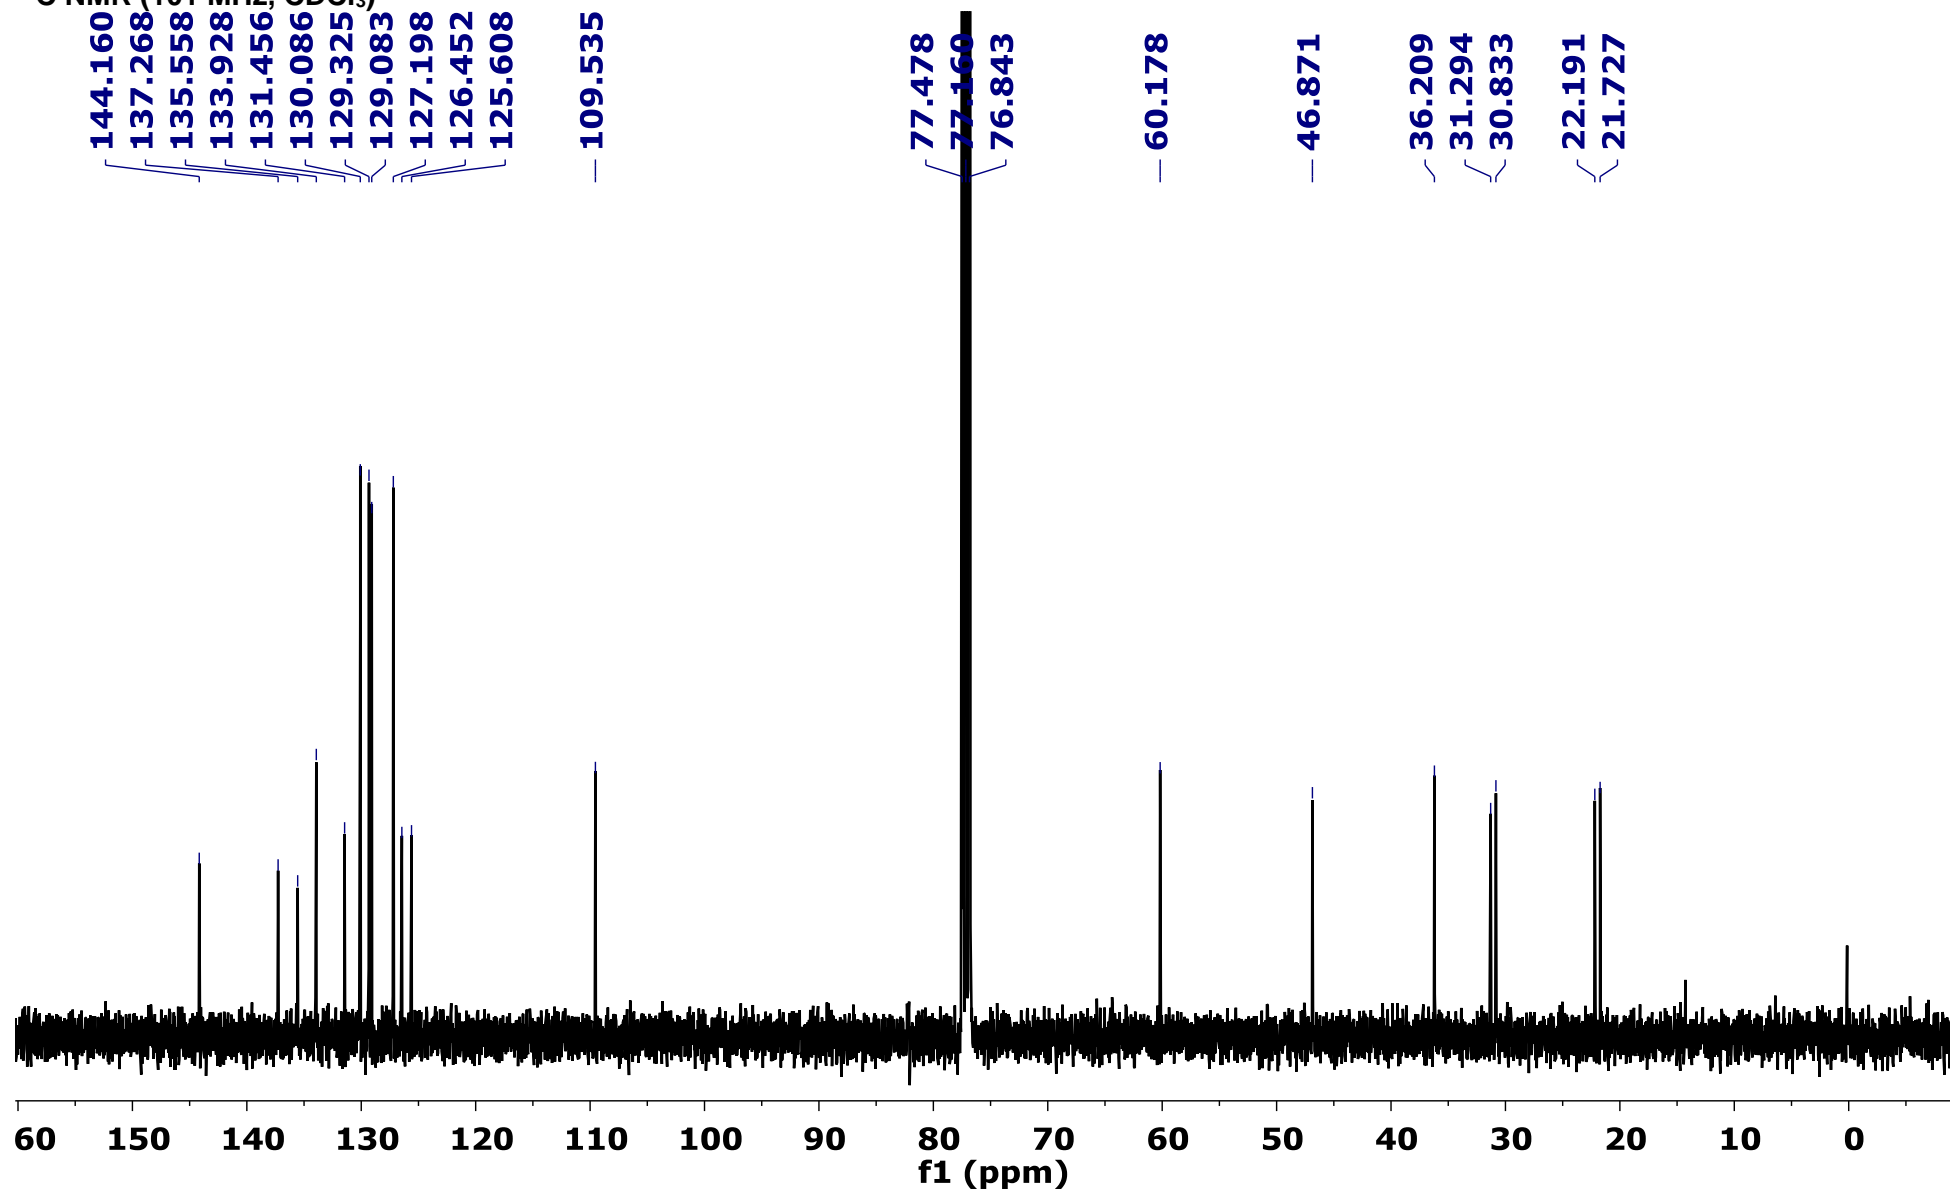

Product 3am

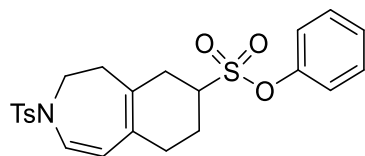

$^1\text{H}$  NMR (400 MHz,  $\text{CDCl}_3$ )

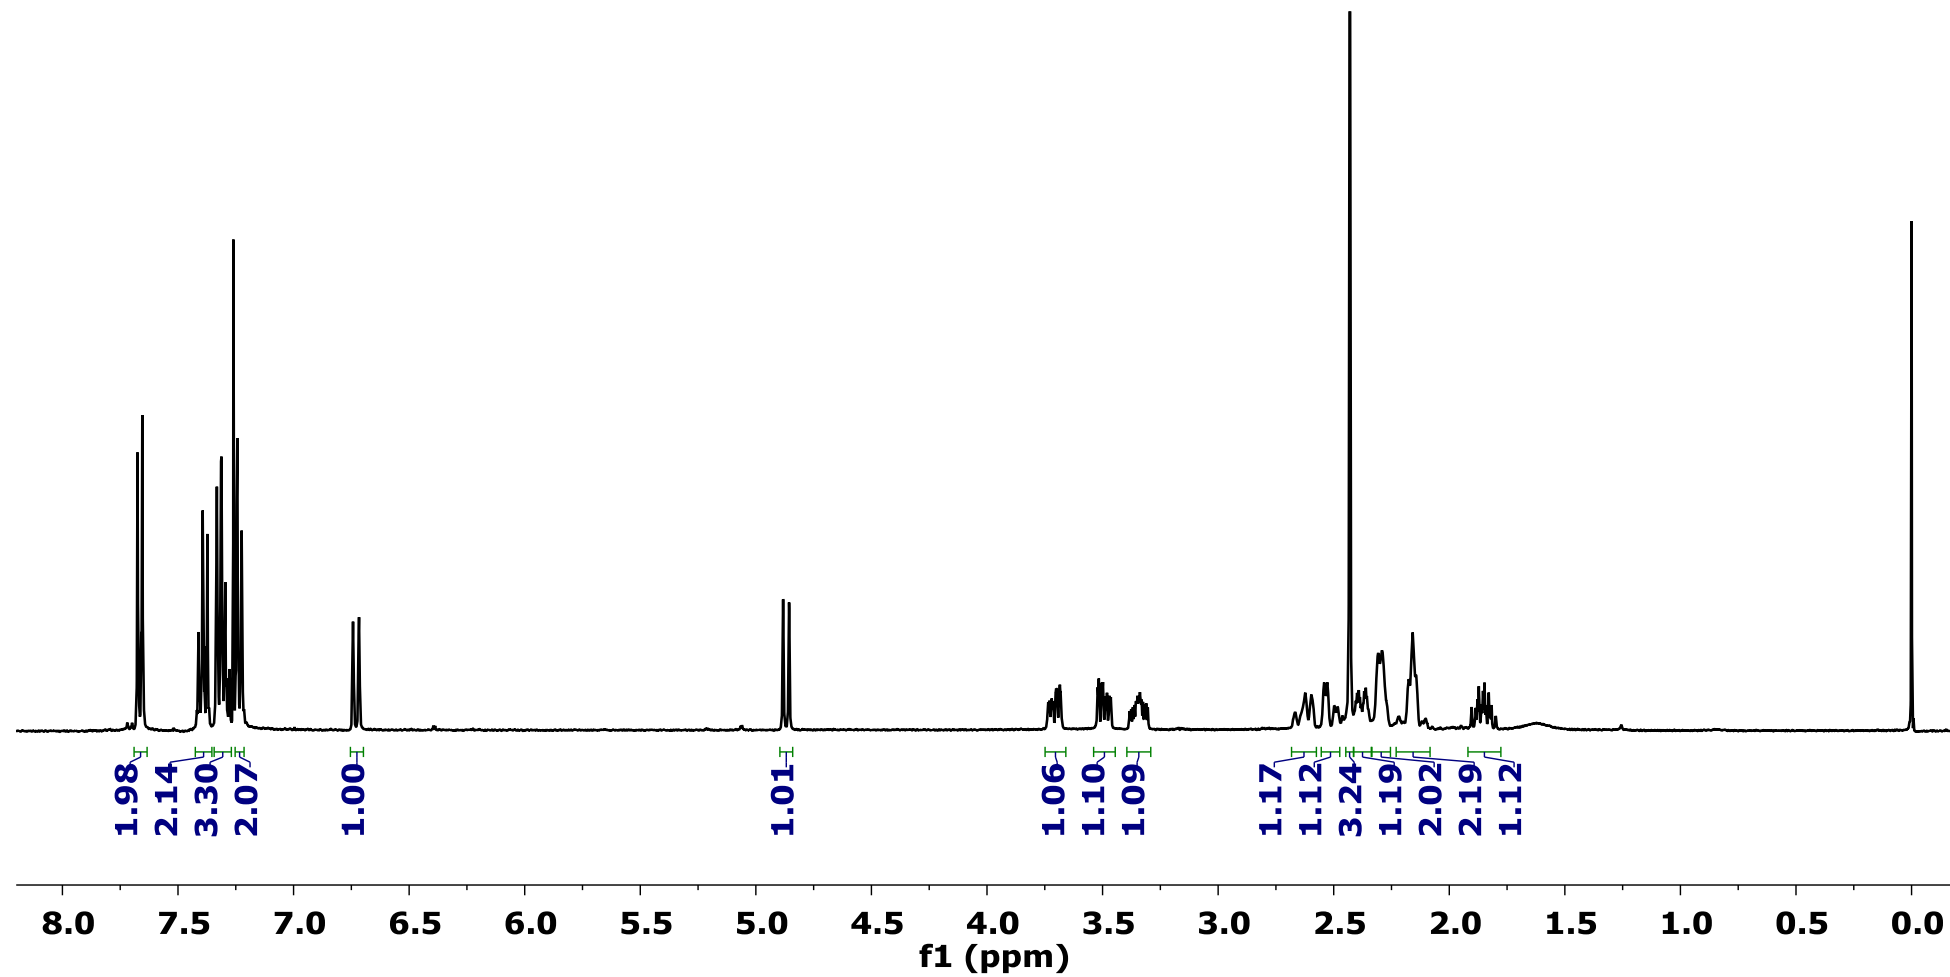

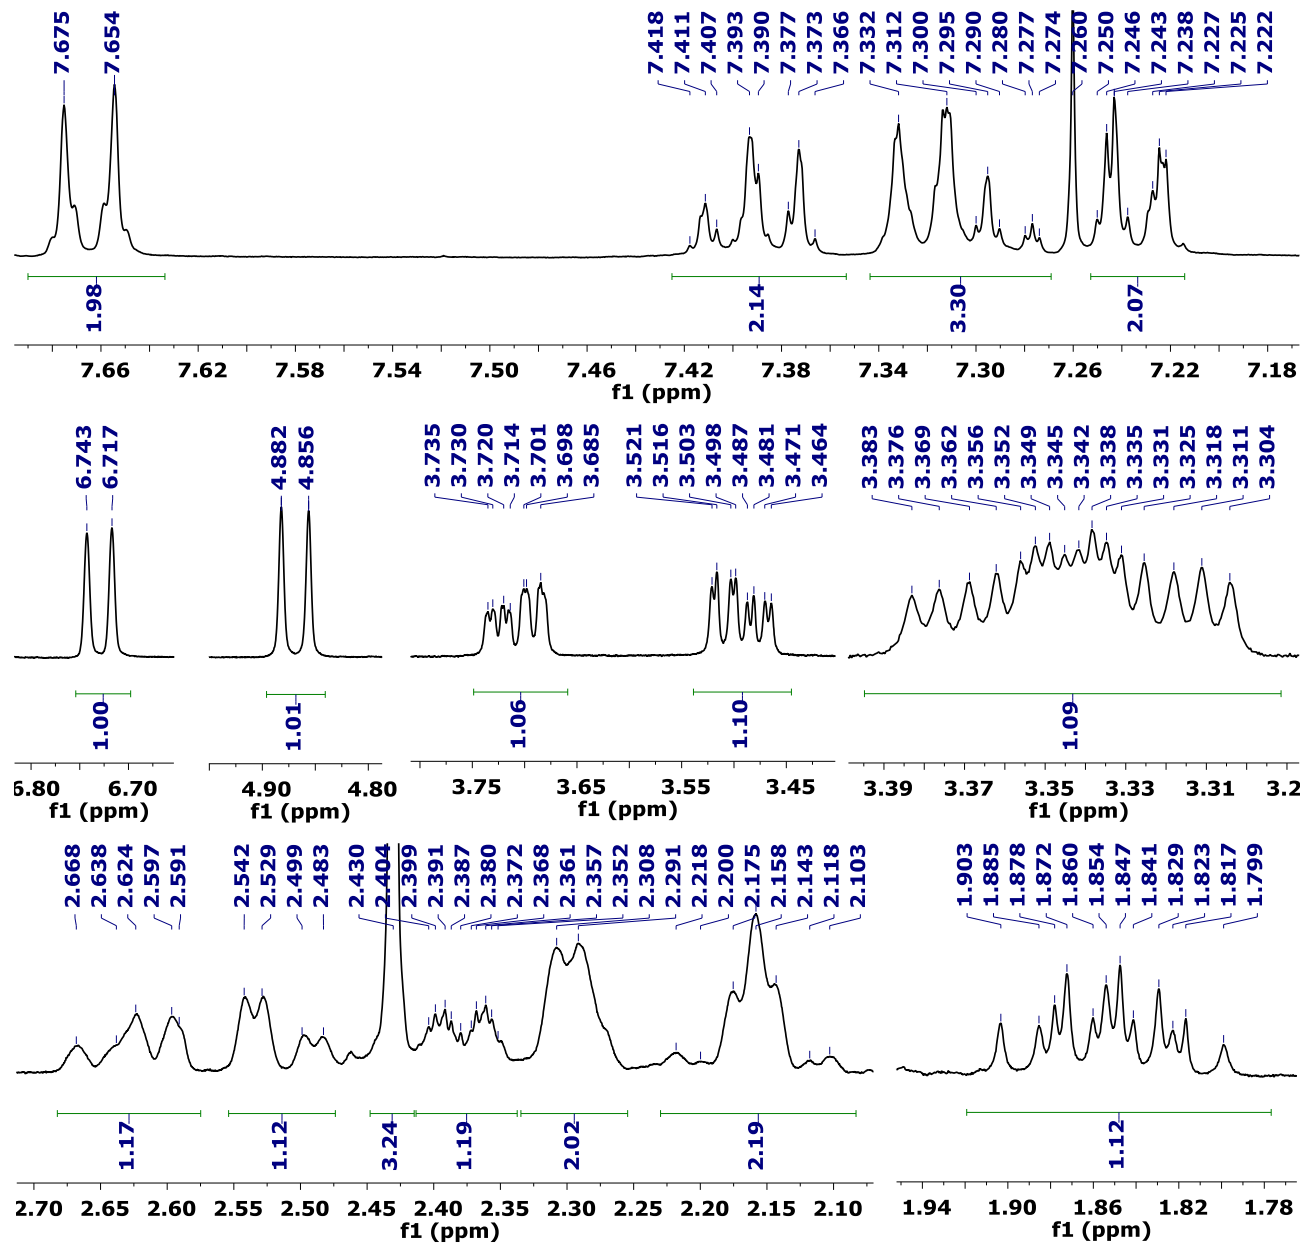

<sup>13</sup>C NMR (101 MHz, CDCl<sub>3</sub>)

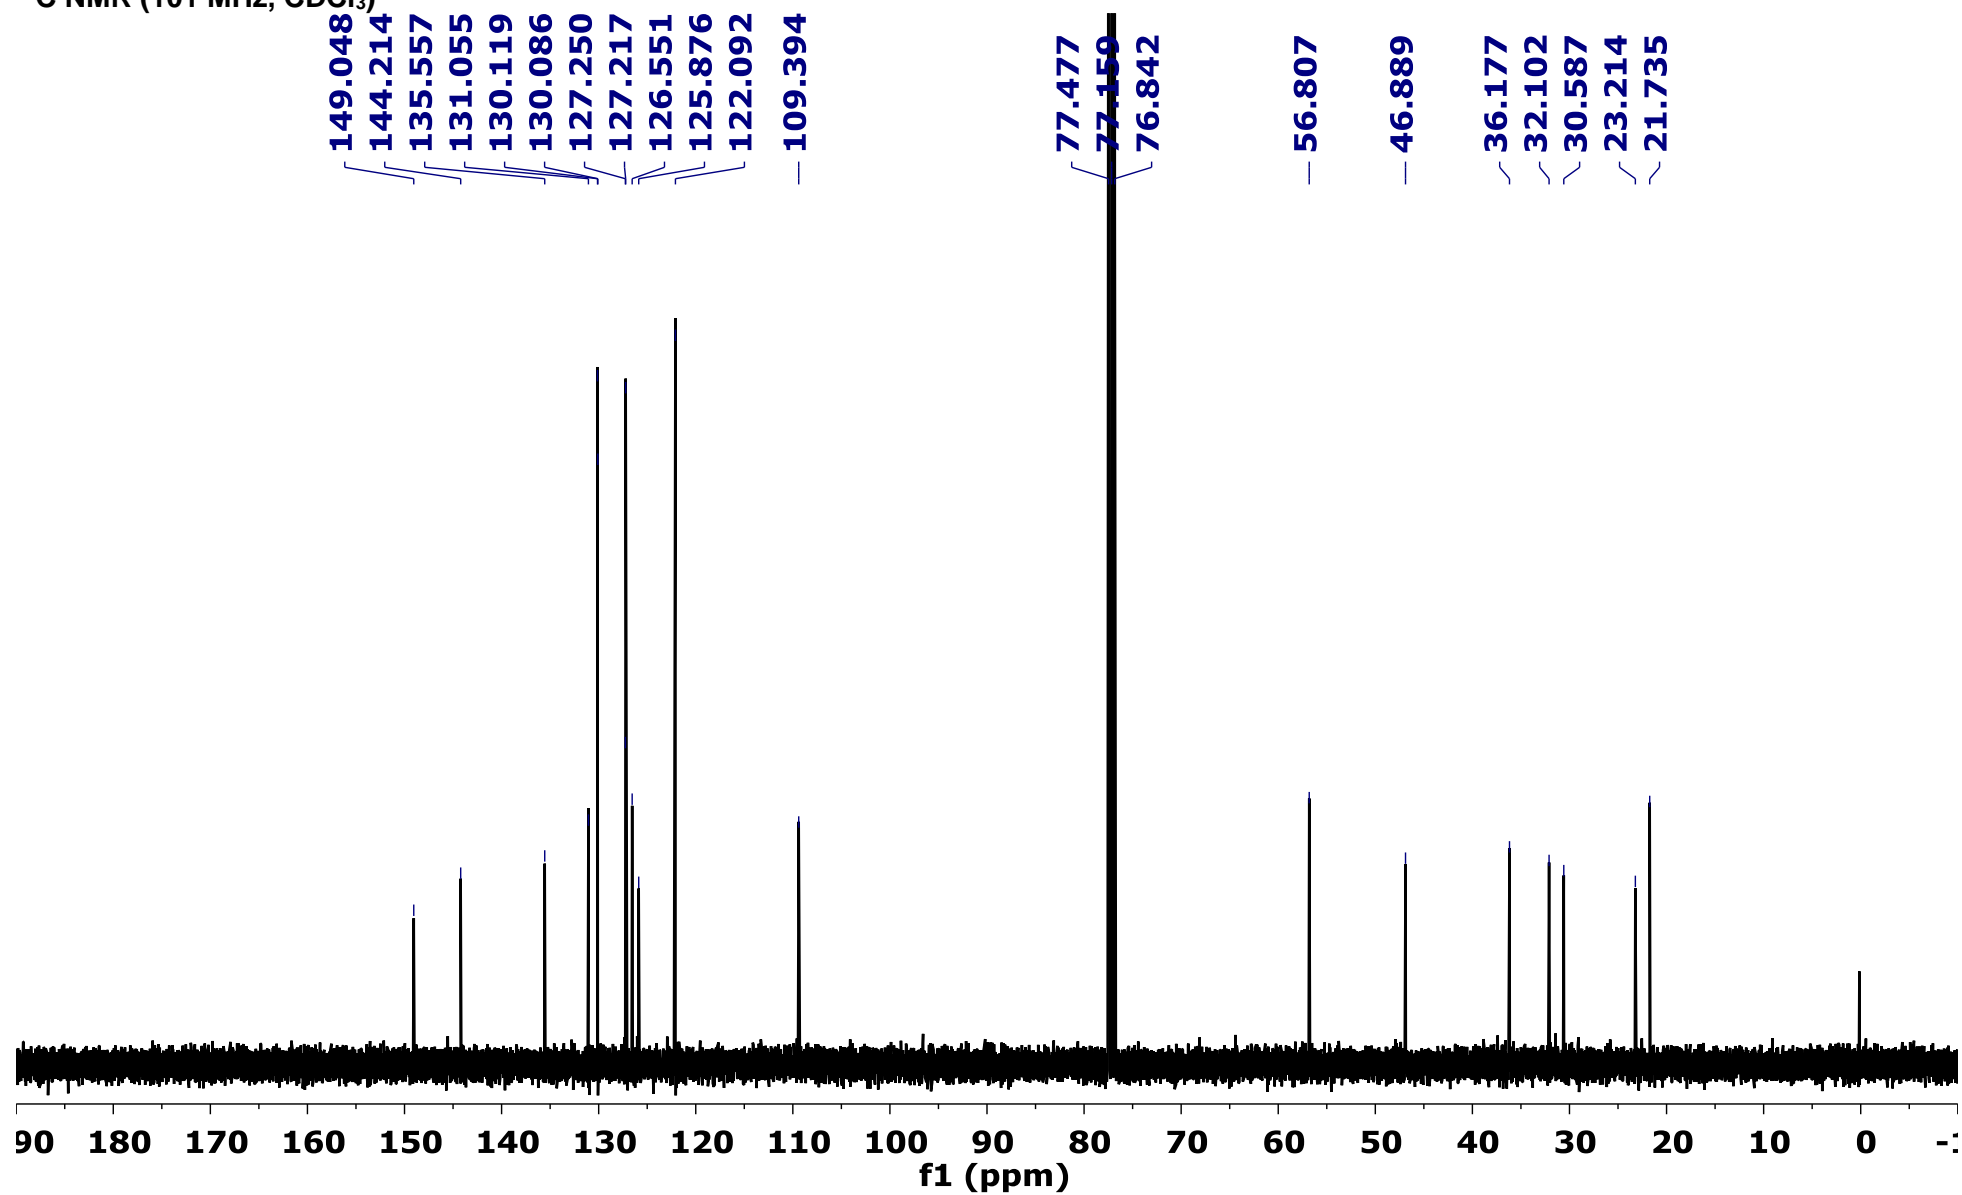

Product 3ba

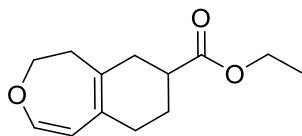

$^1\text{H}$  NMR (400 MHz,  $\text{CDCl}_3$ )

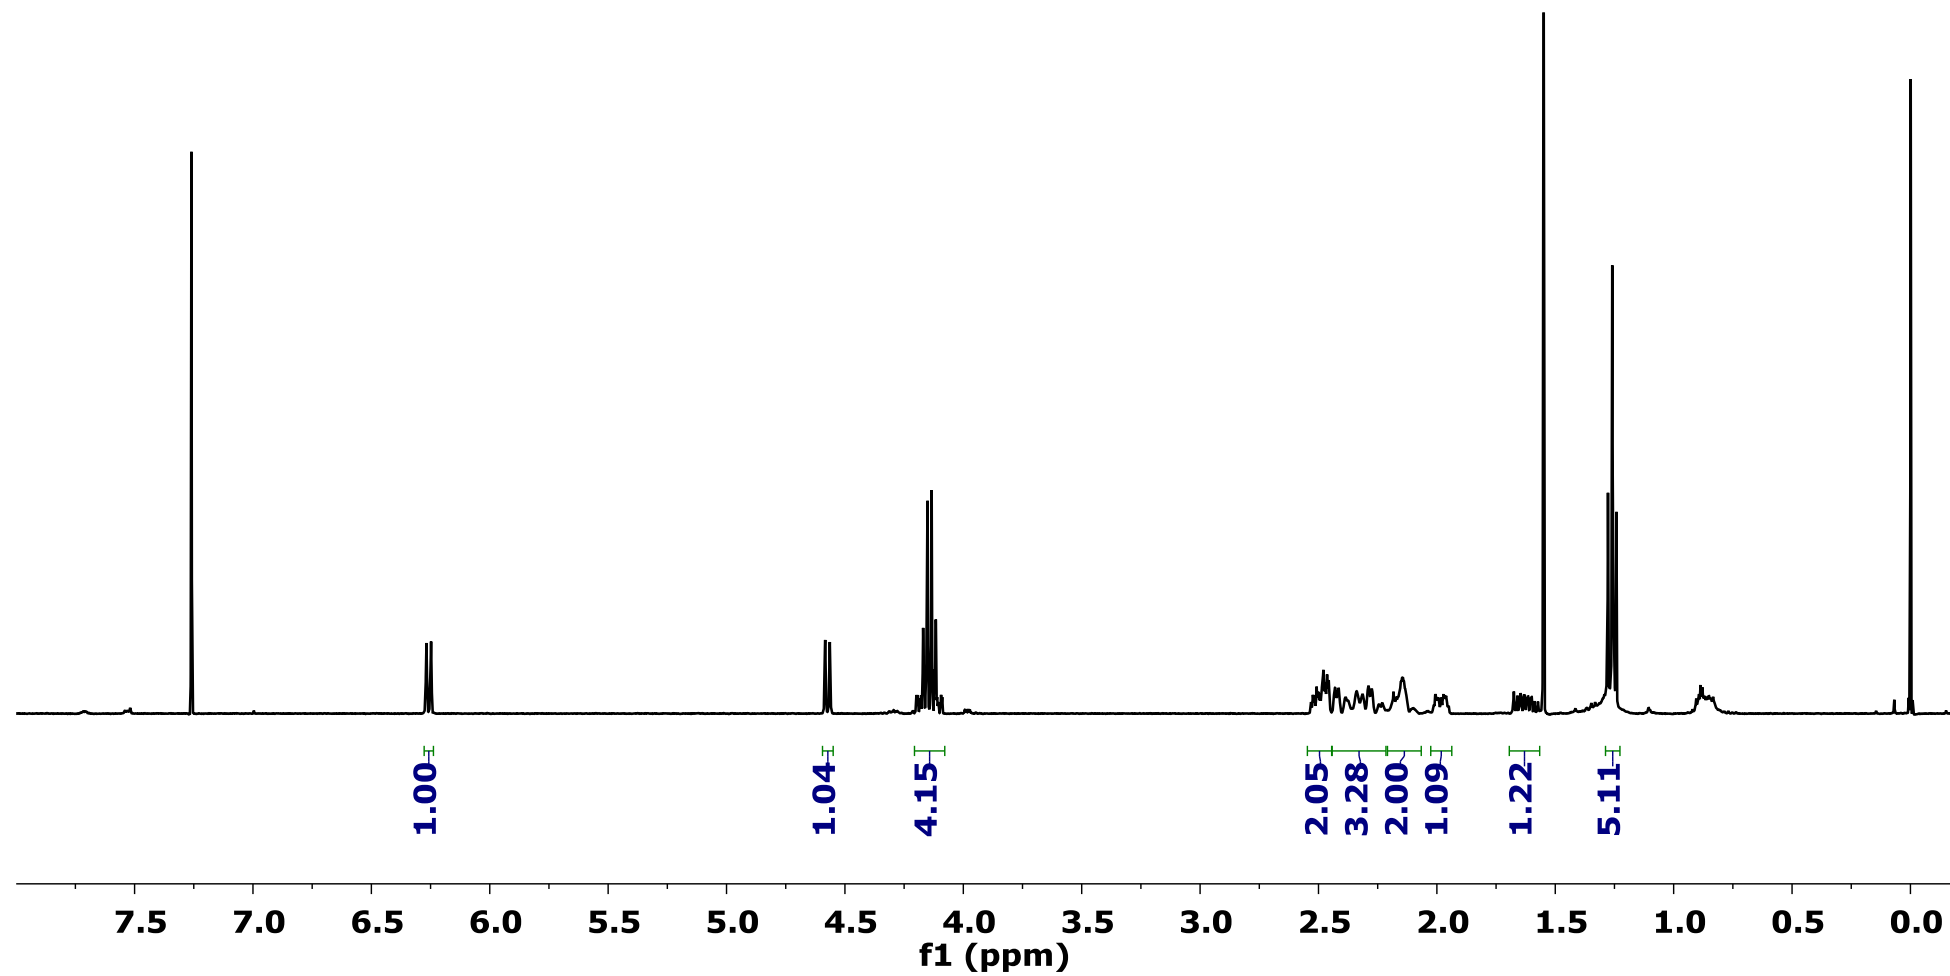

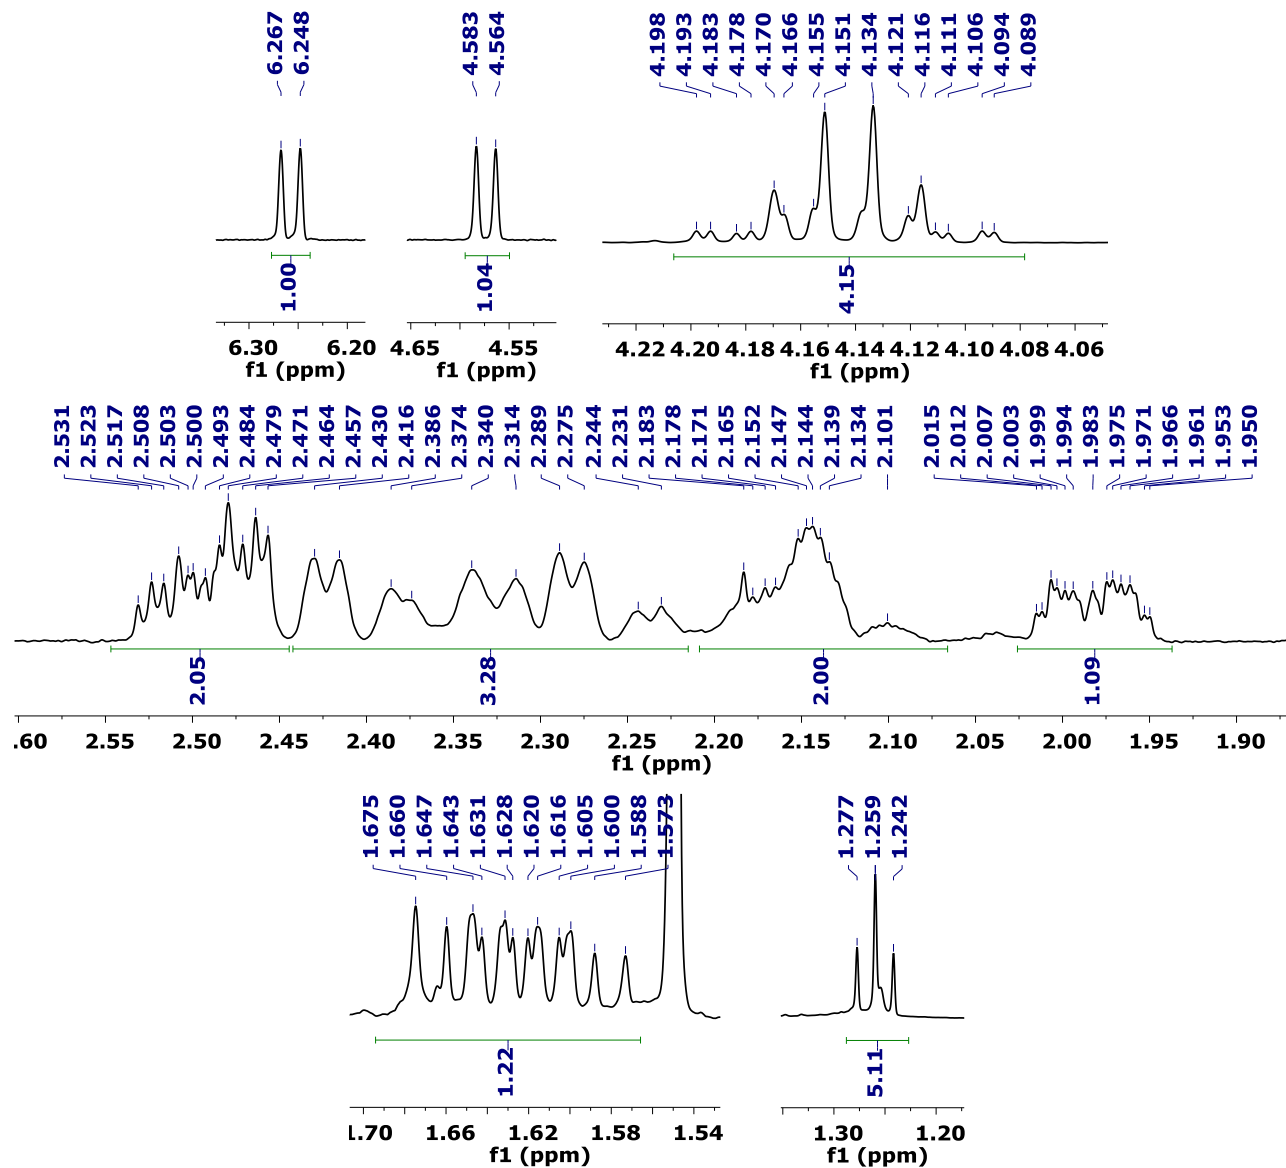

<sup>13</sup>C NMR (101 MHz, CDCl<sub>3</sub>)

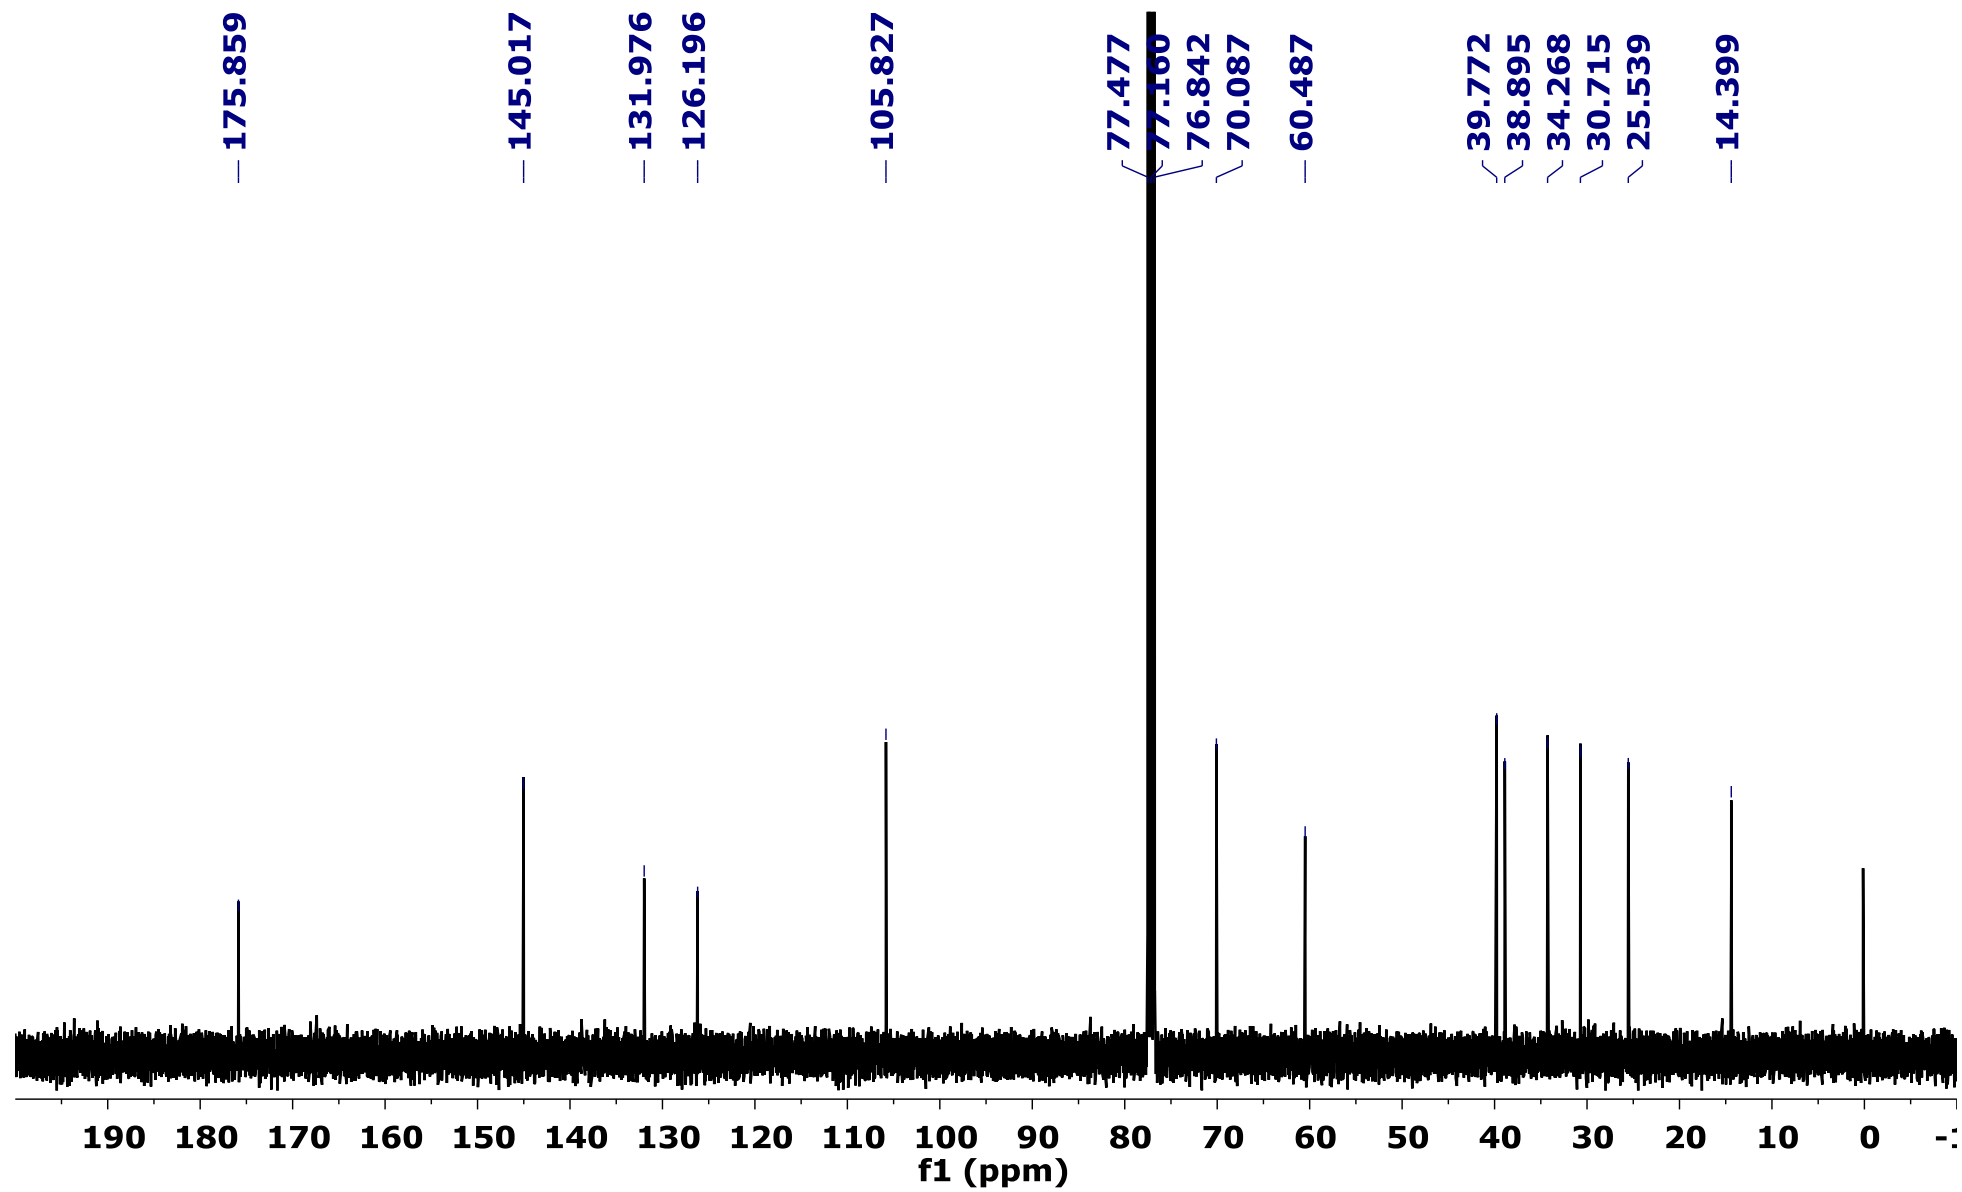



Product 3bg

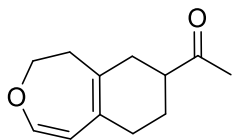

$^1\text{H}$  NMR (400 MHz,  $\text{CDCl}_3$ )

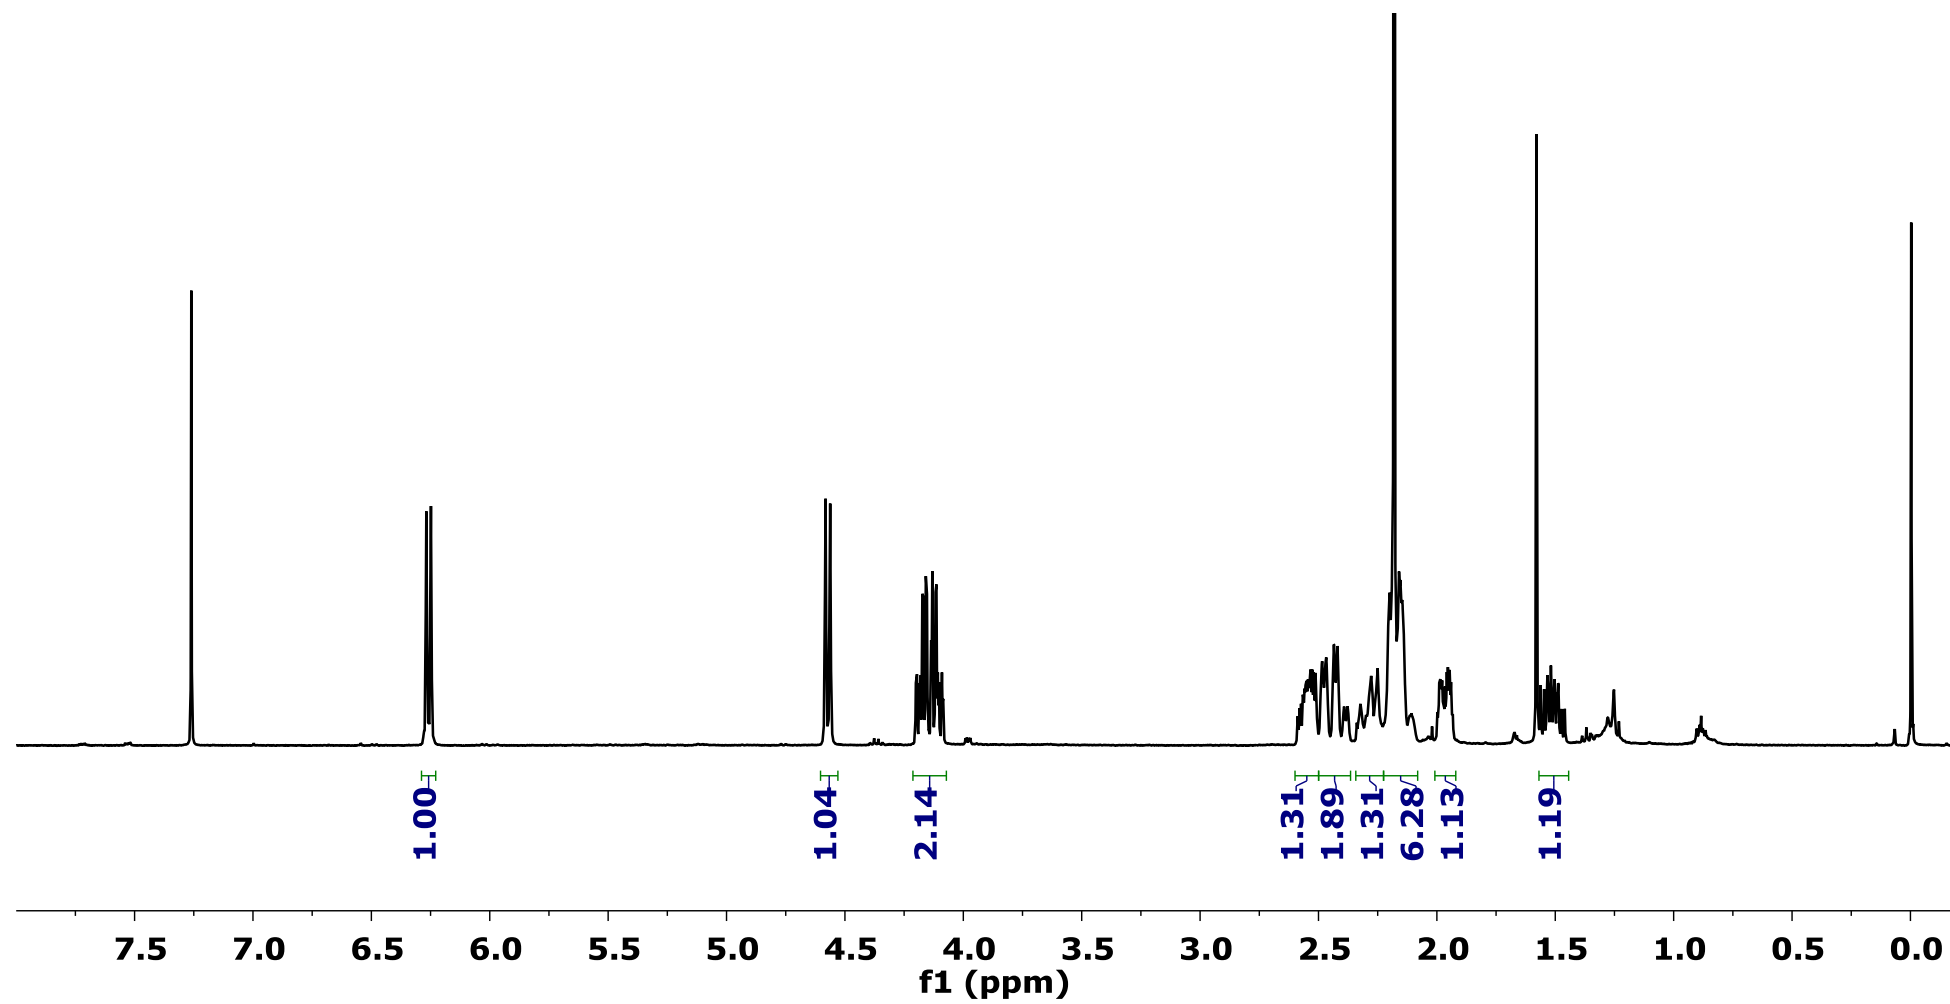

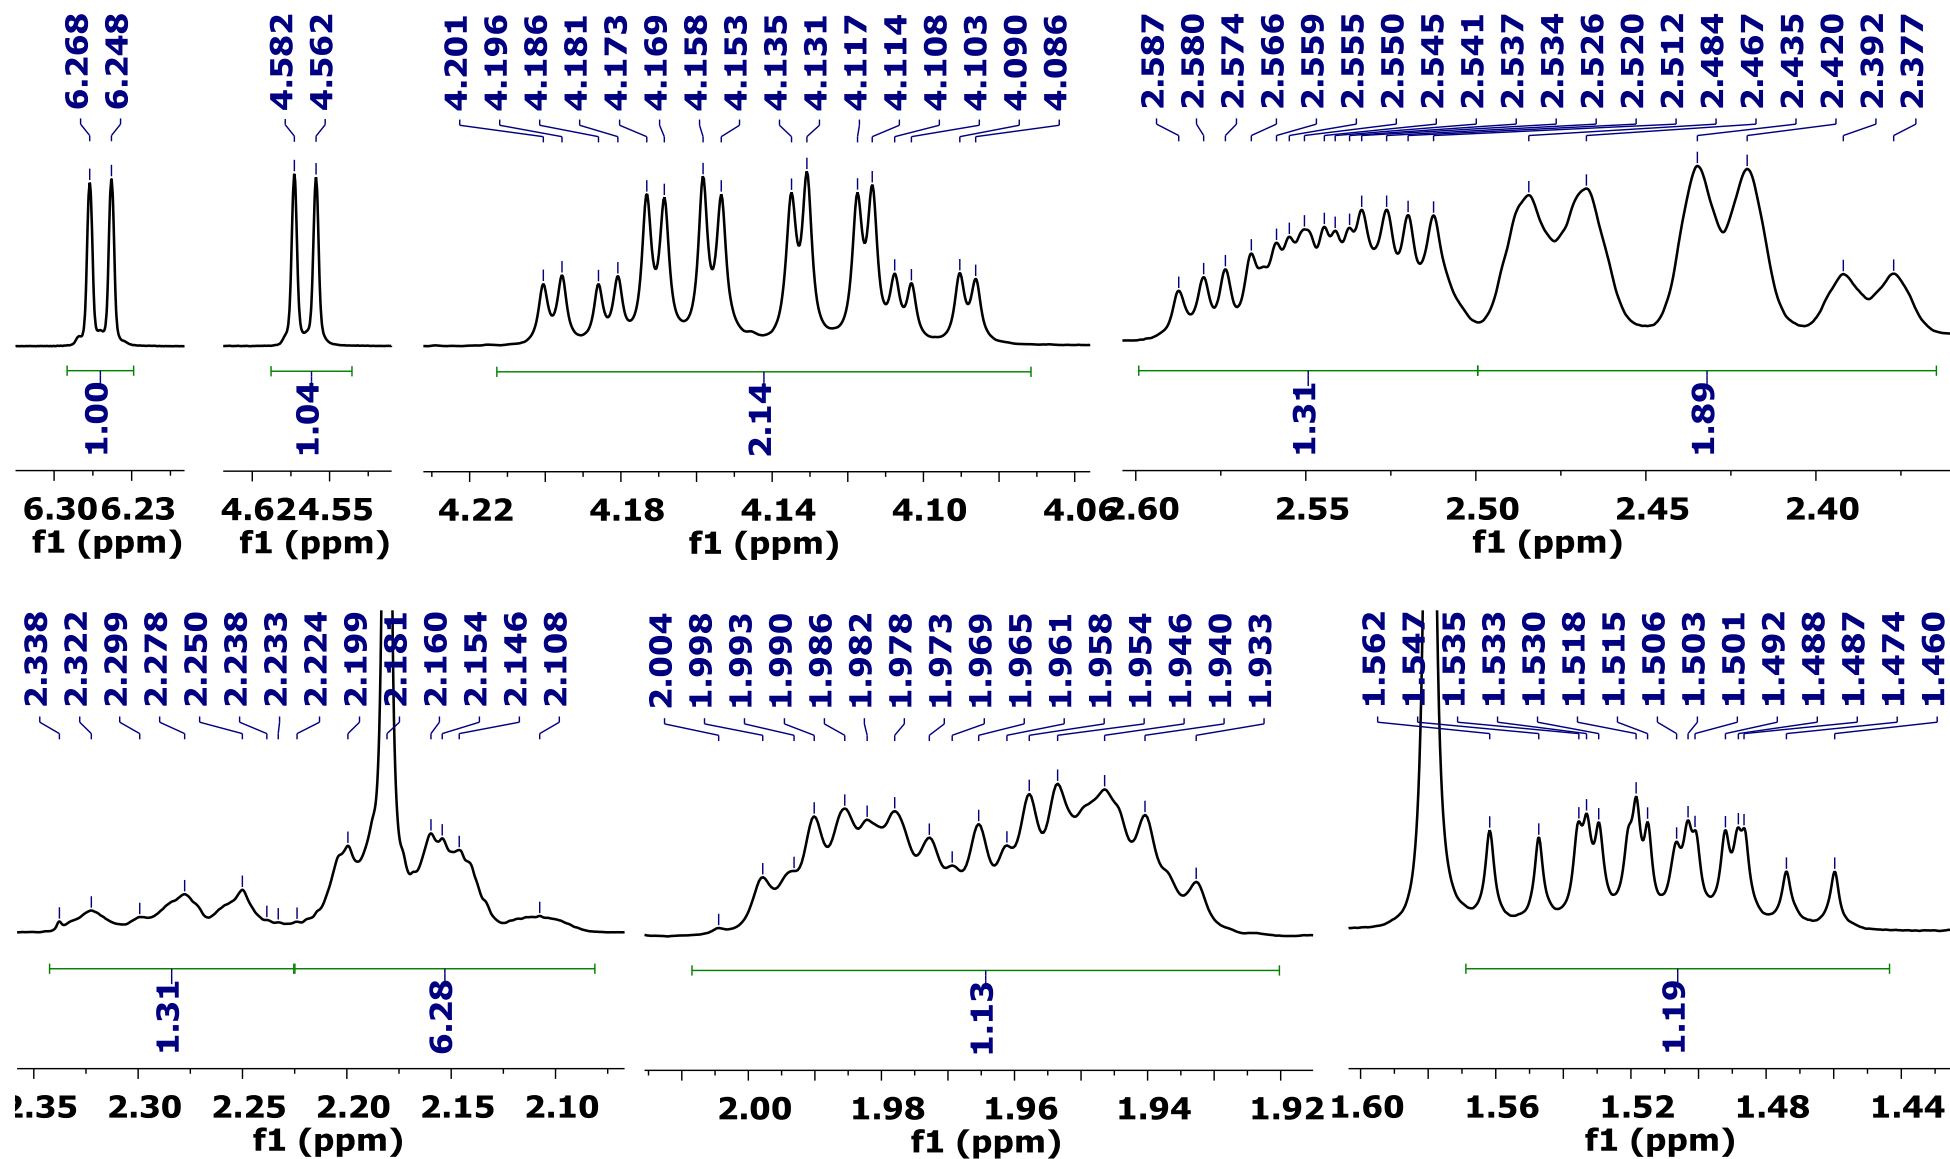

<sup>13</sup>C NMR (101 MHz, CDCl<sub>3</sub>)

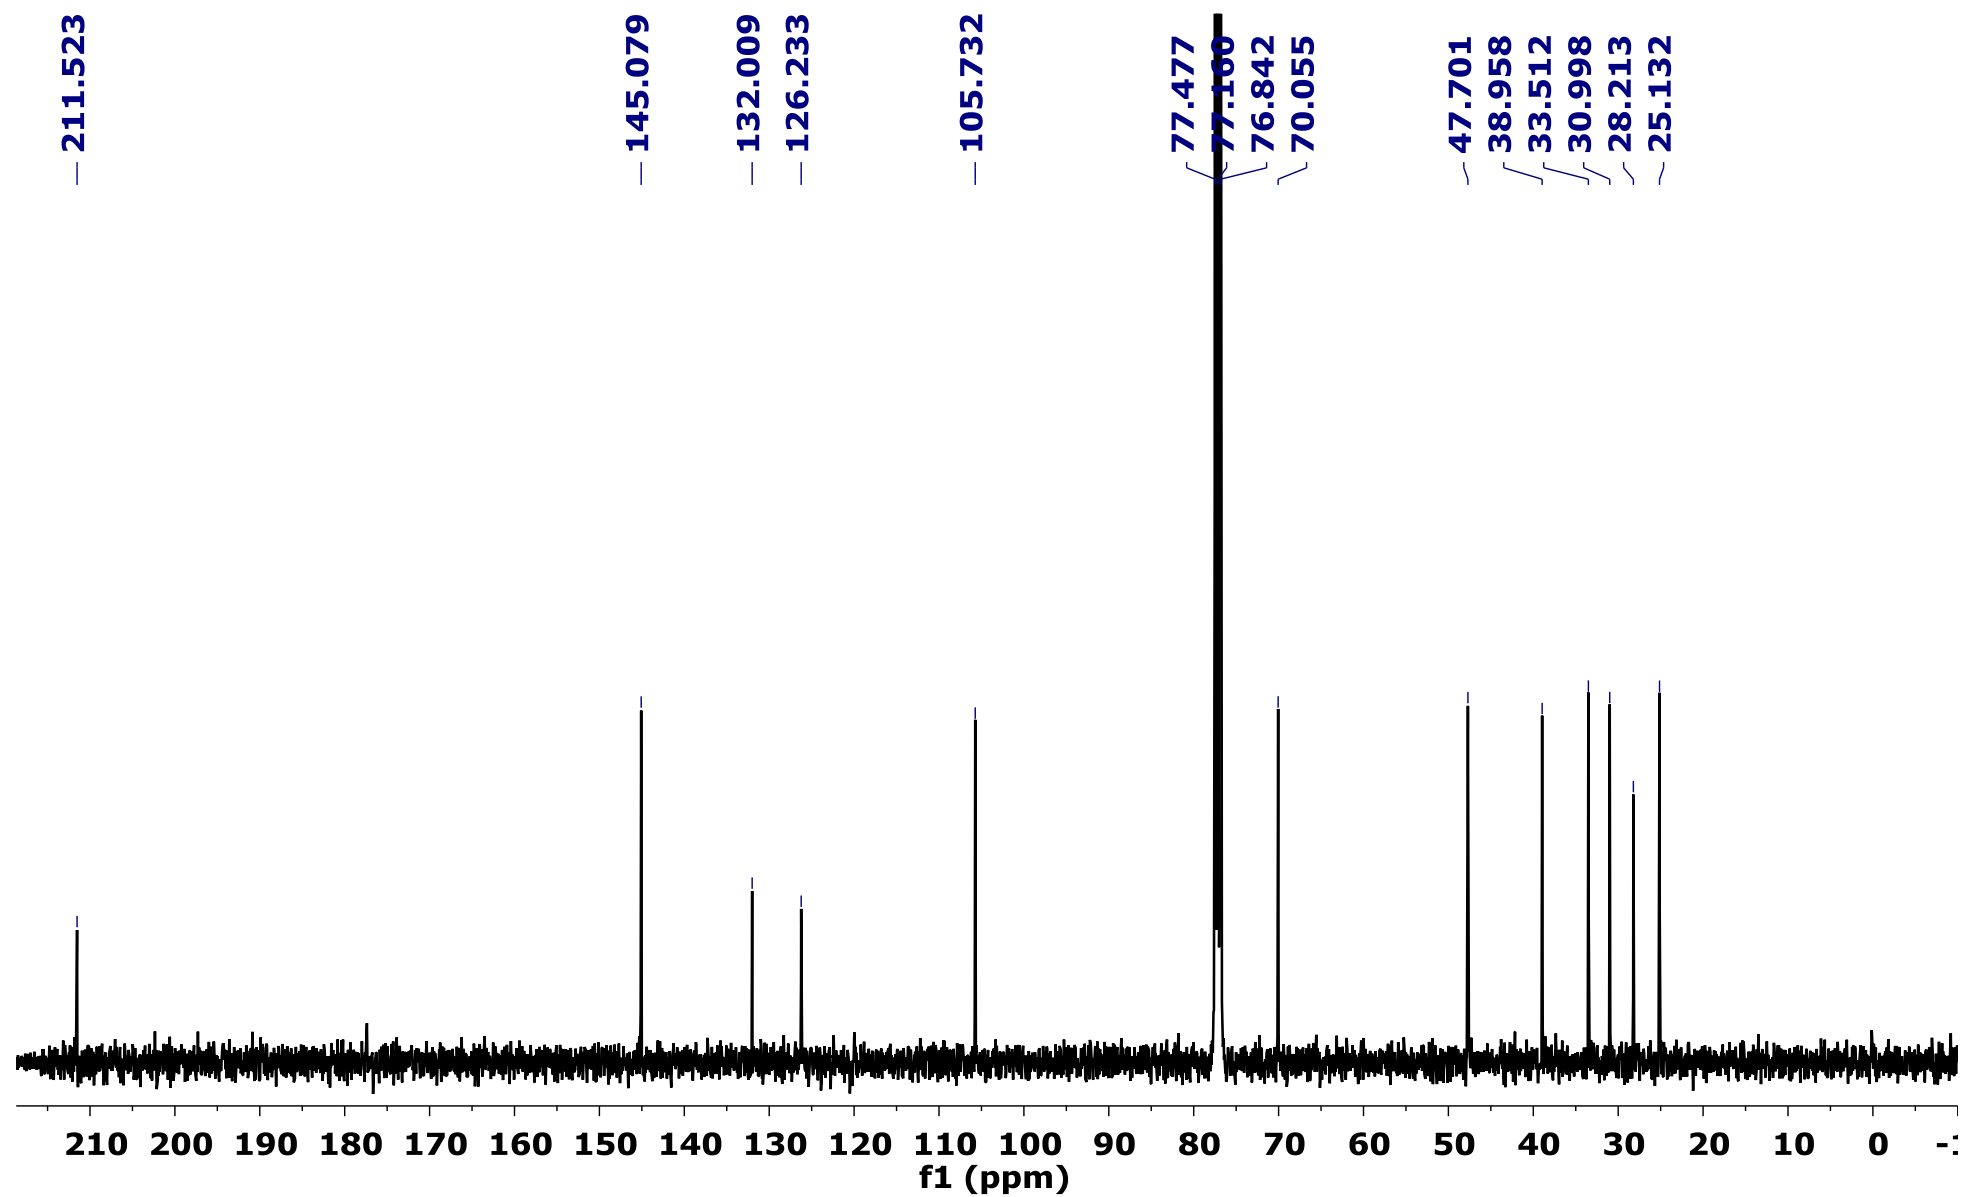

# 2D NMR HSQC

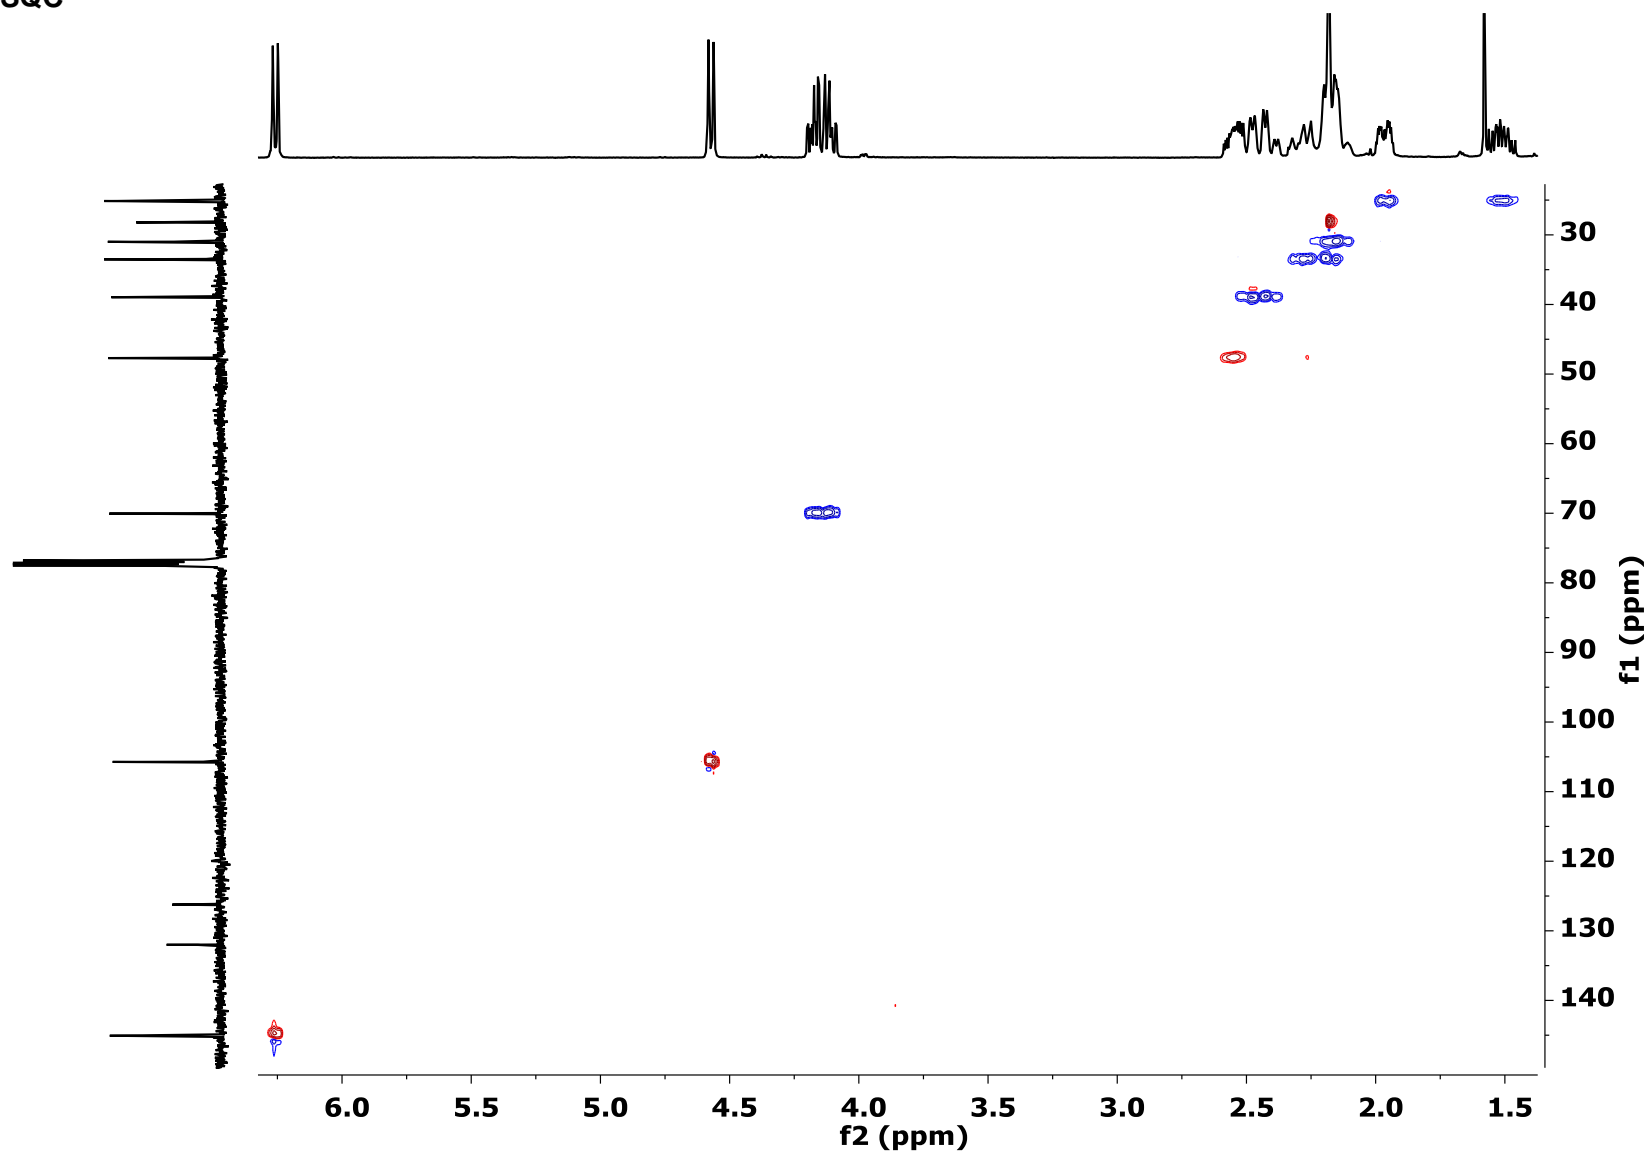

S80

# 2D NMR HMBC

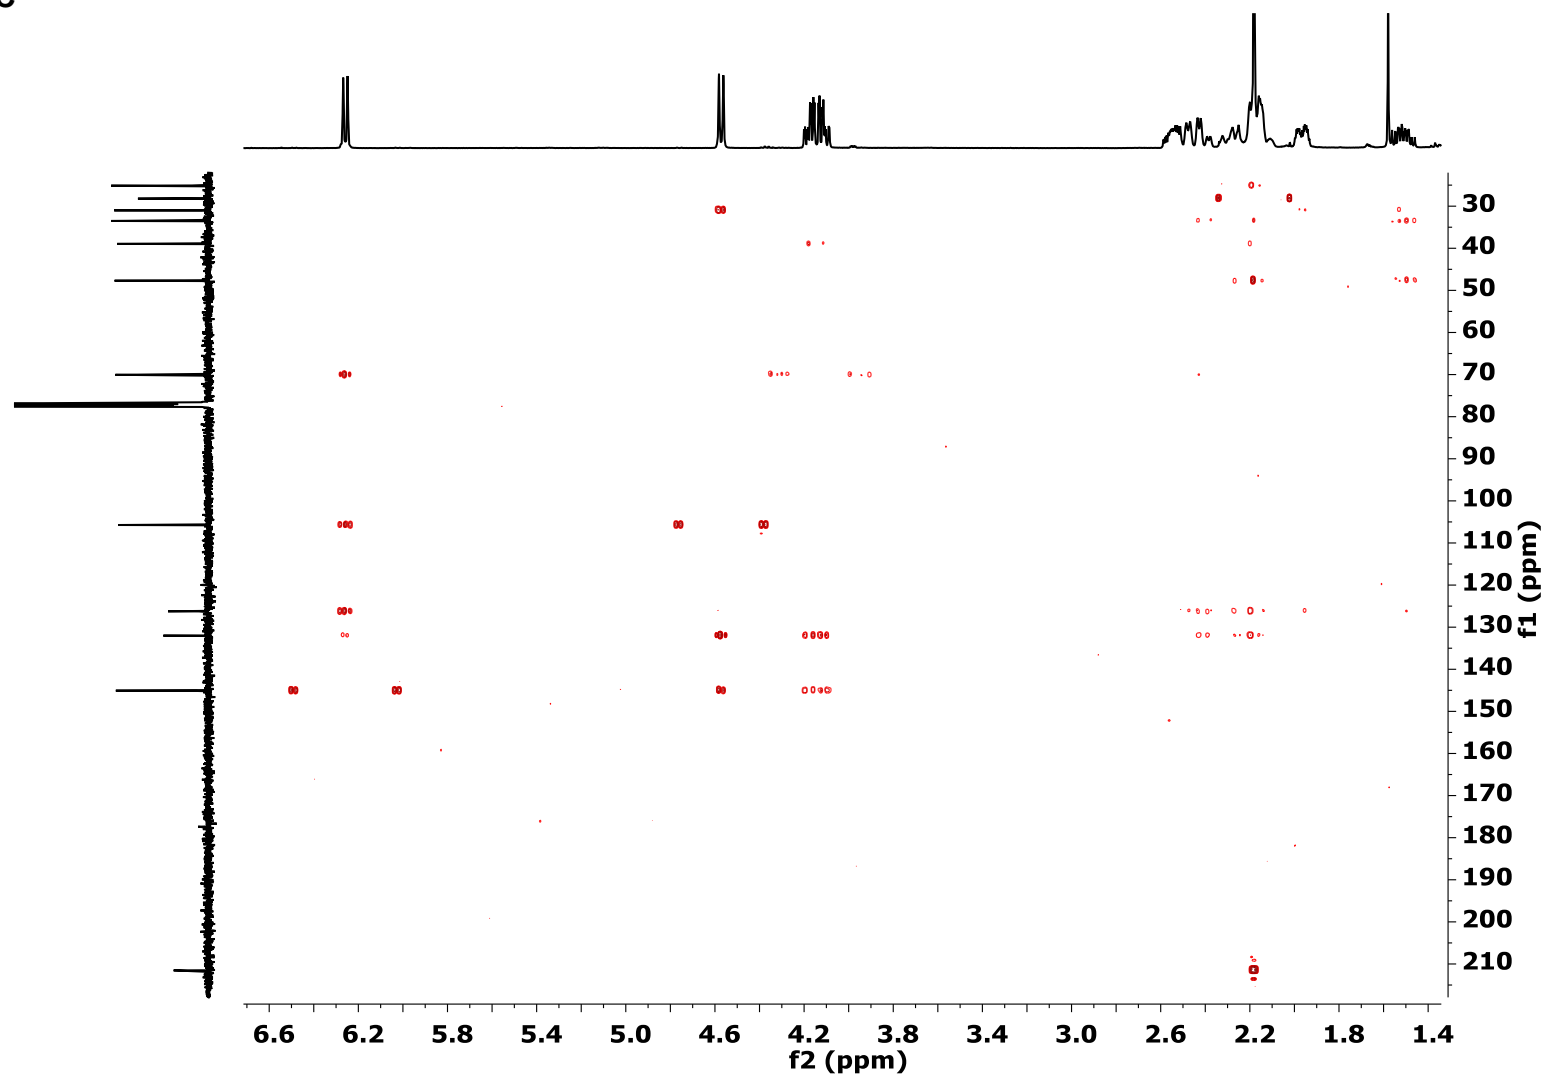

2D NMR COSY

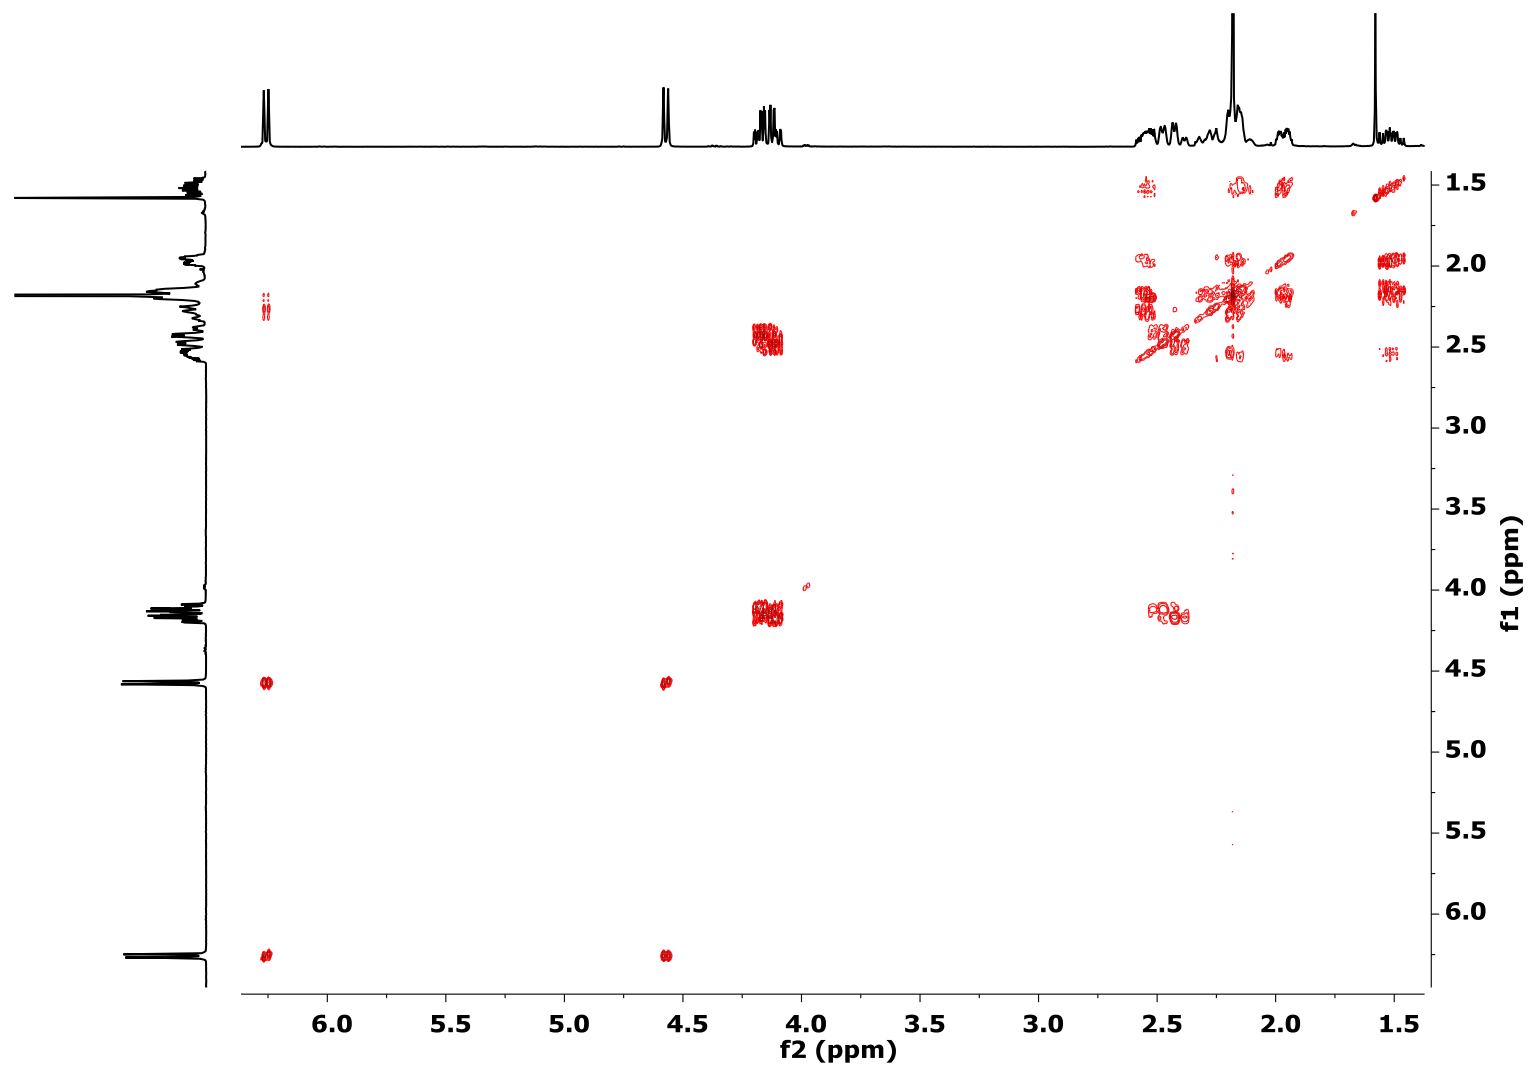

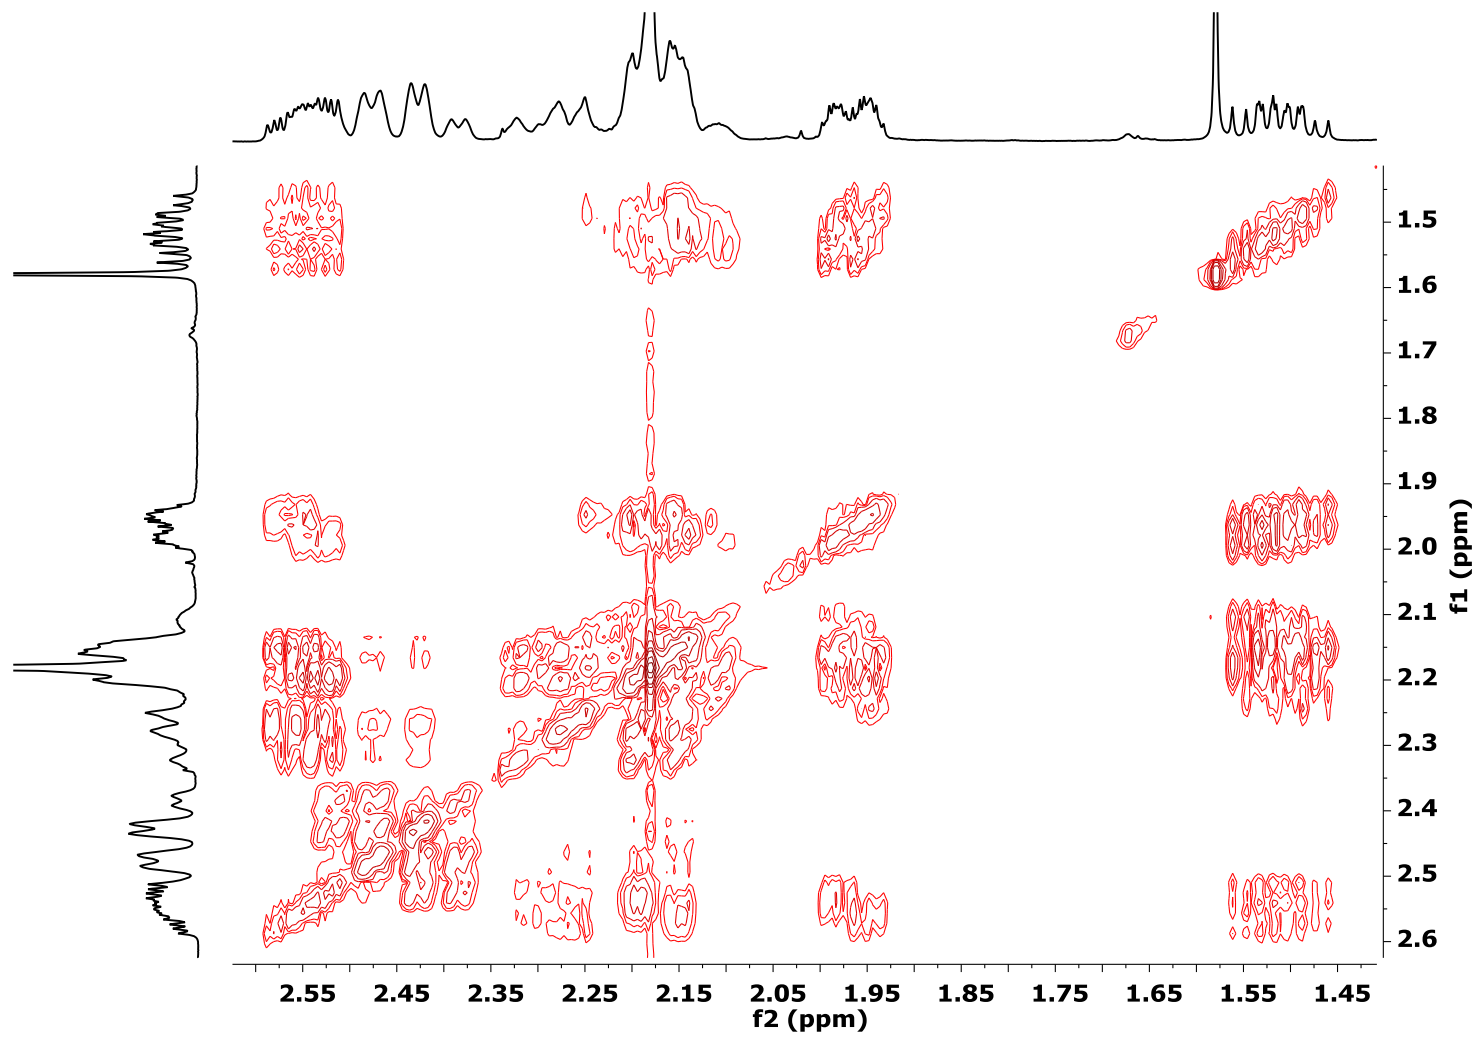

# 2D NMR NOESY

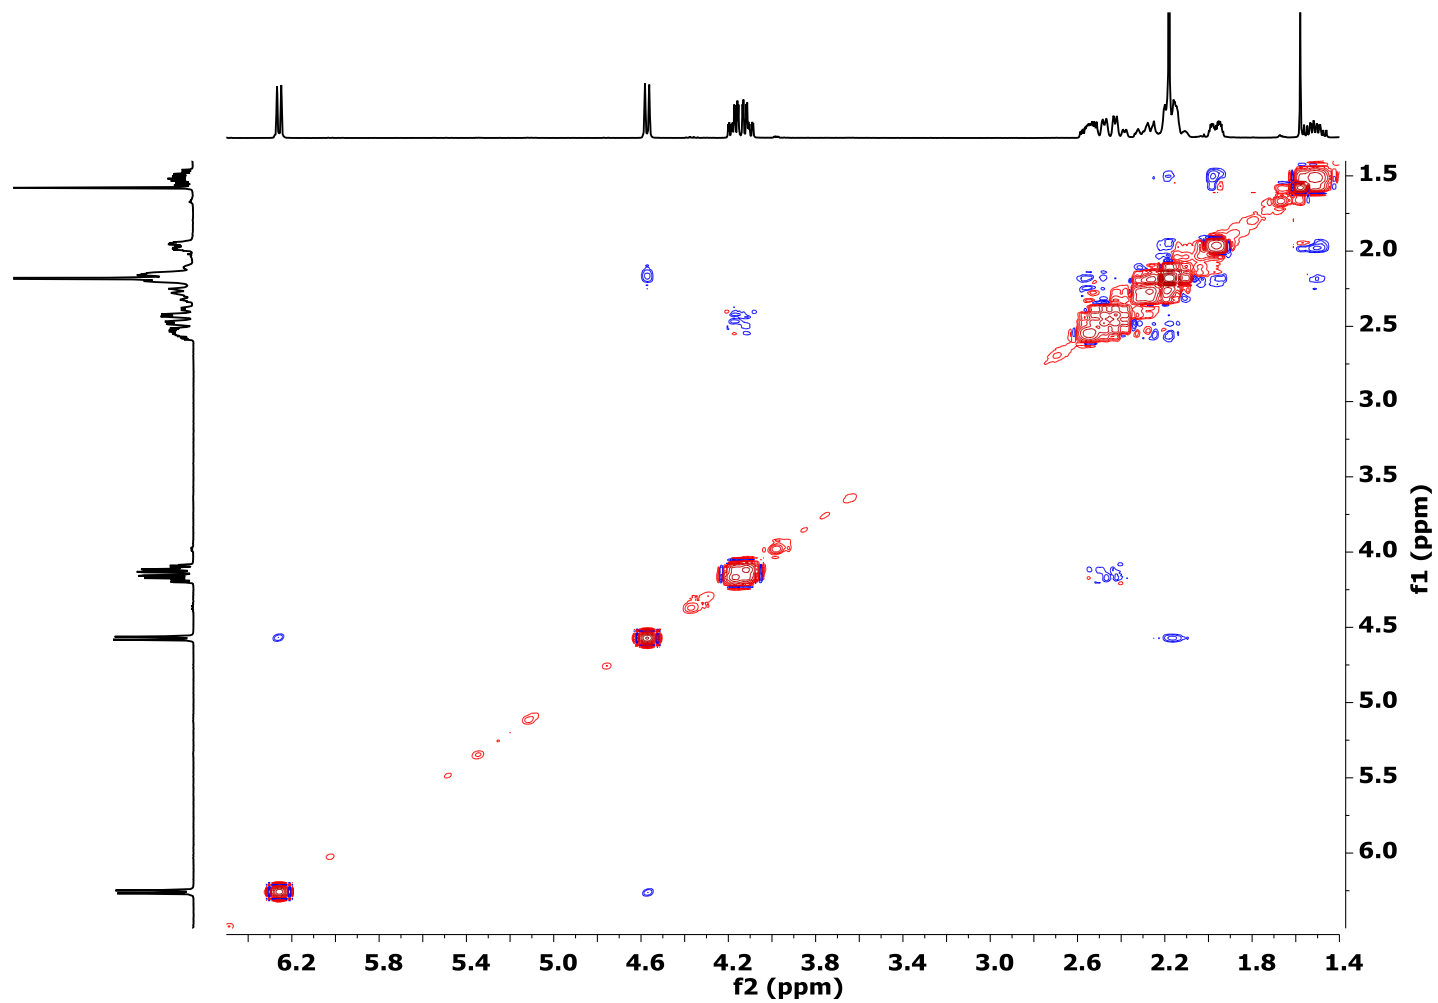



1D NMR SELECTIVE NOESY

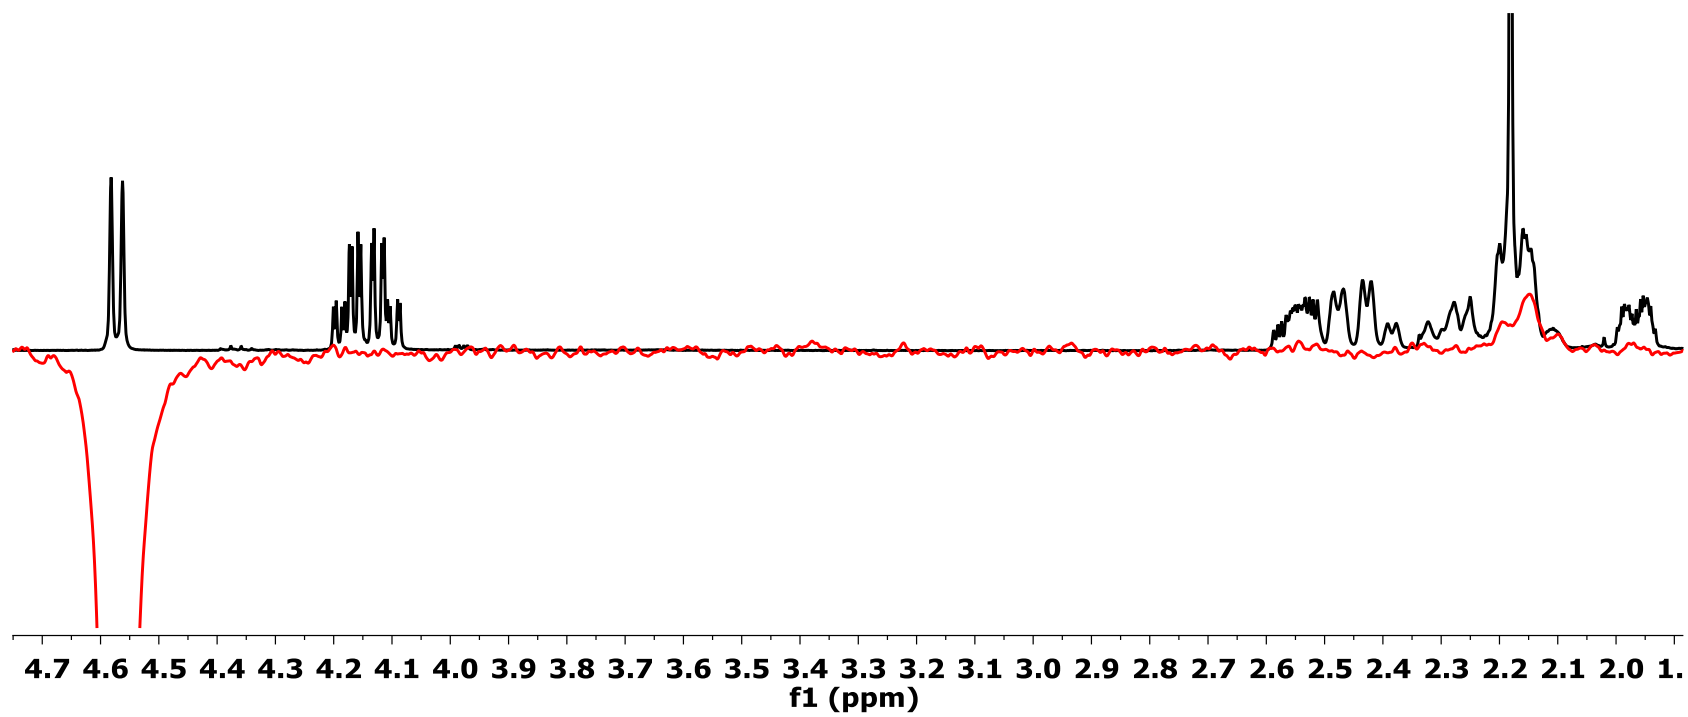

Product 3bj

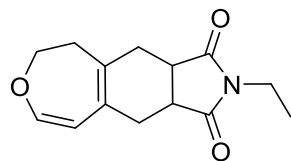

$^1\text{H}$  NMR (400 MHz,  $\text{CDCl}_3$ )

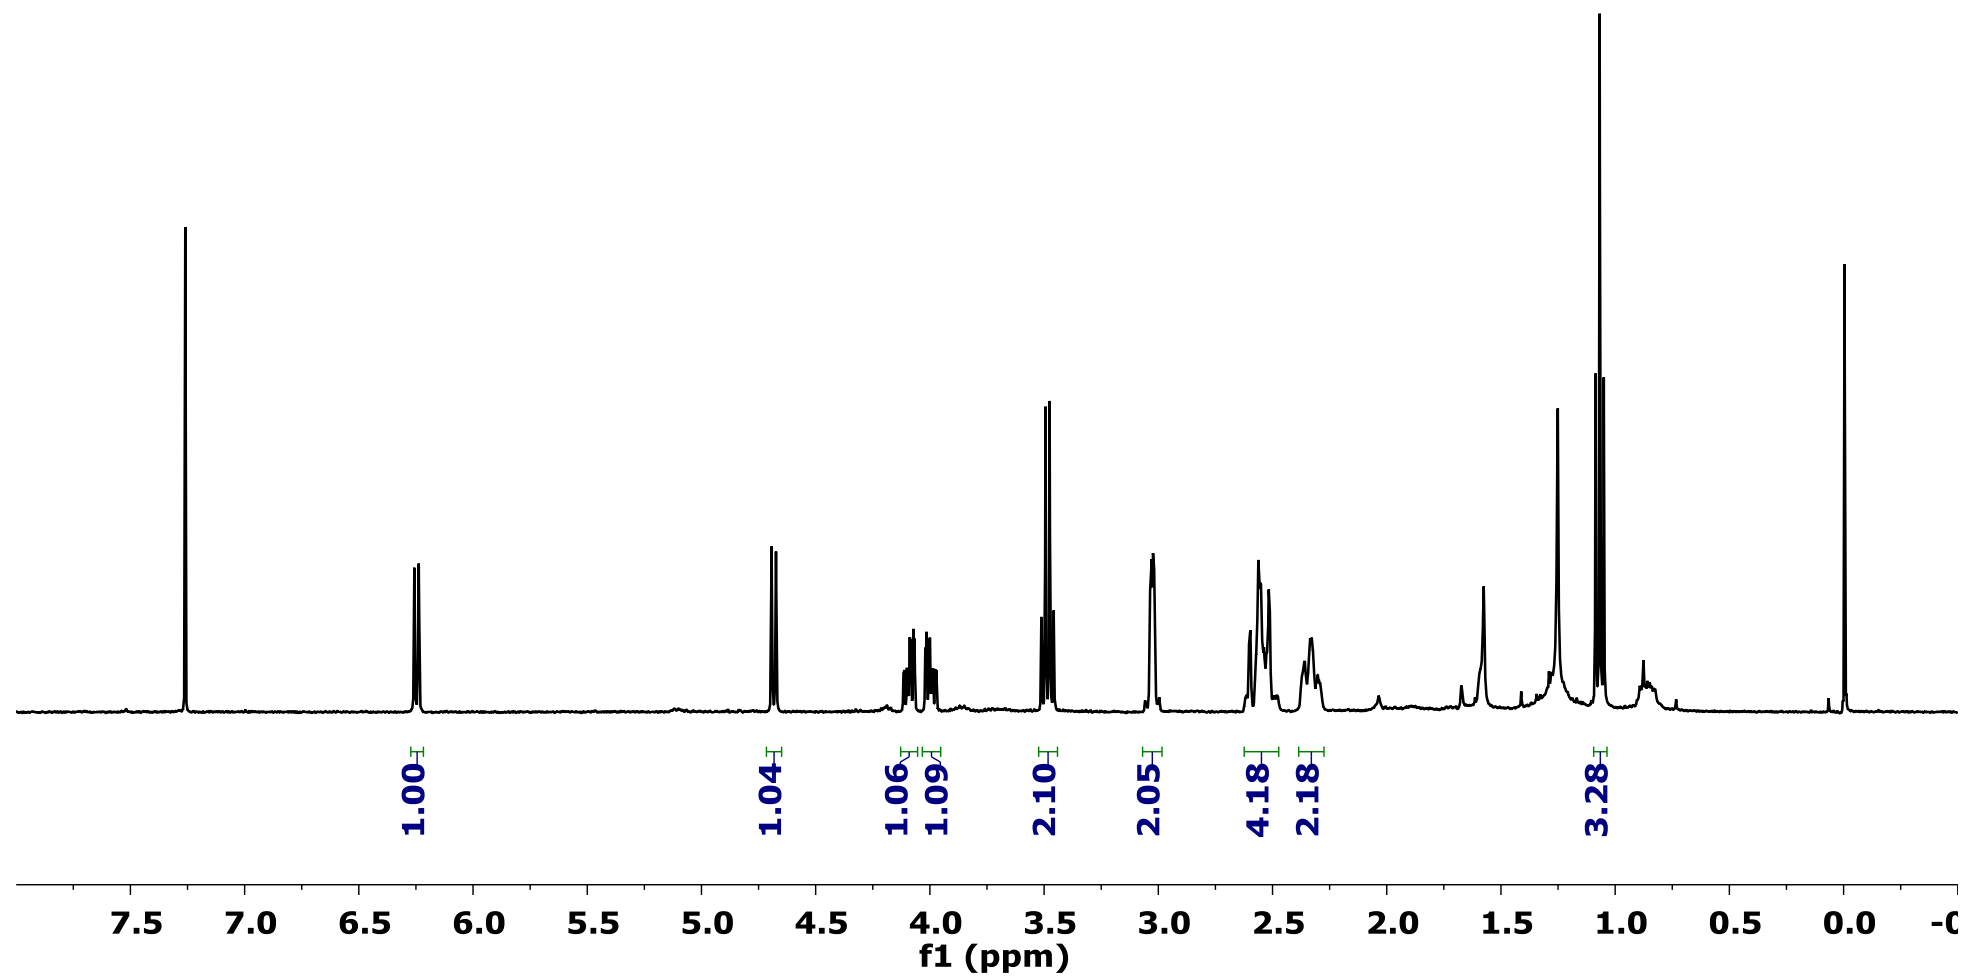

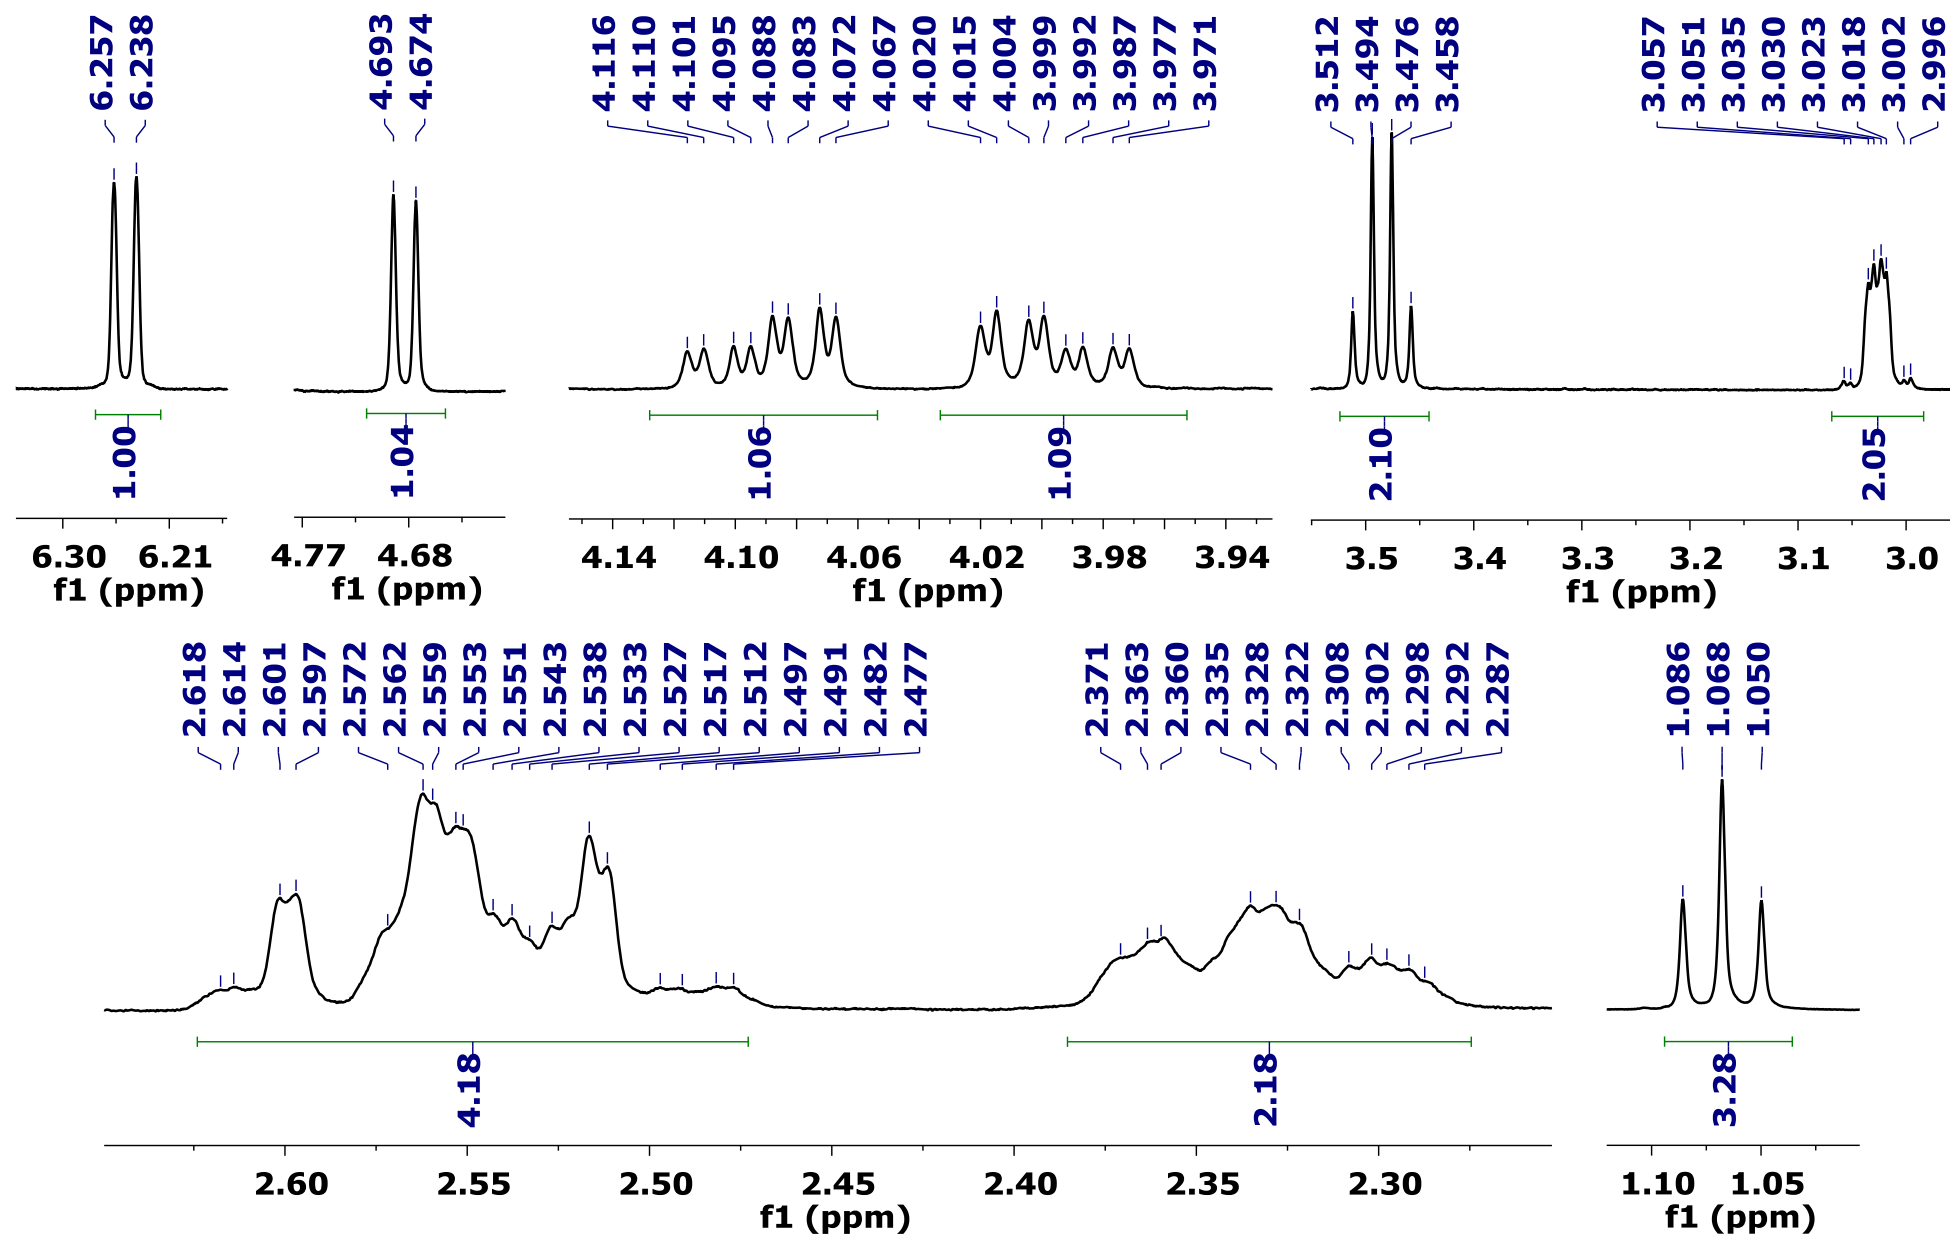

<sup>13</sup>C NMR (101 MHz, CDCl<sub>3</sub>)

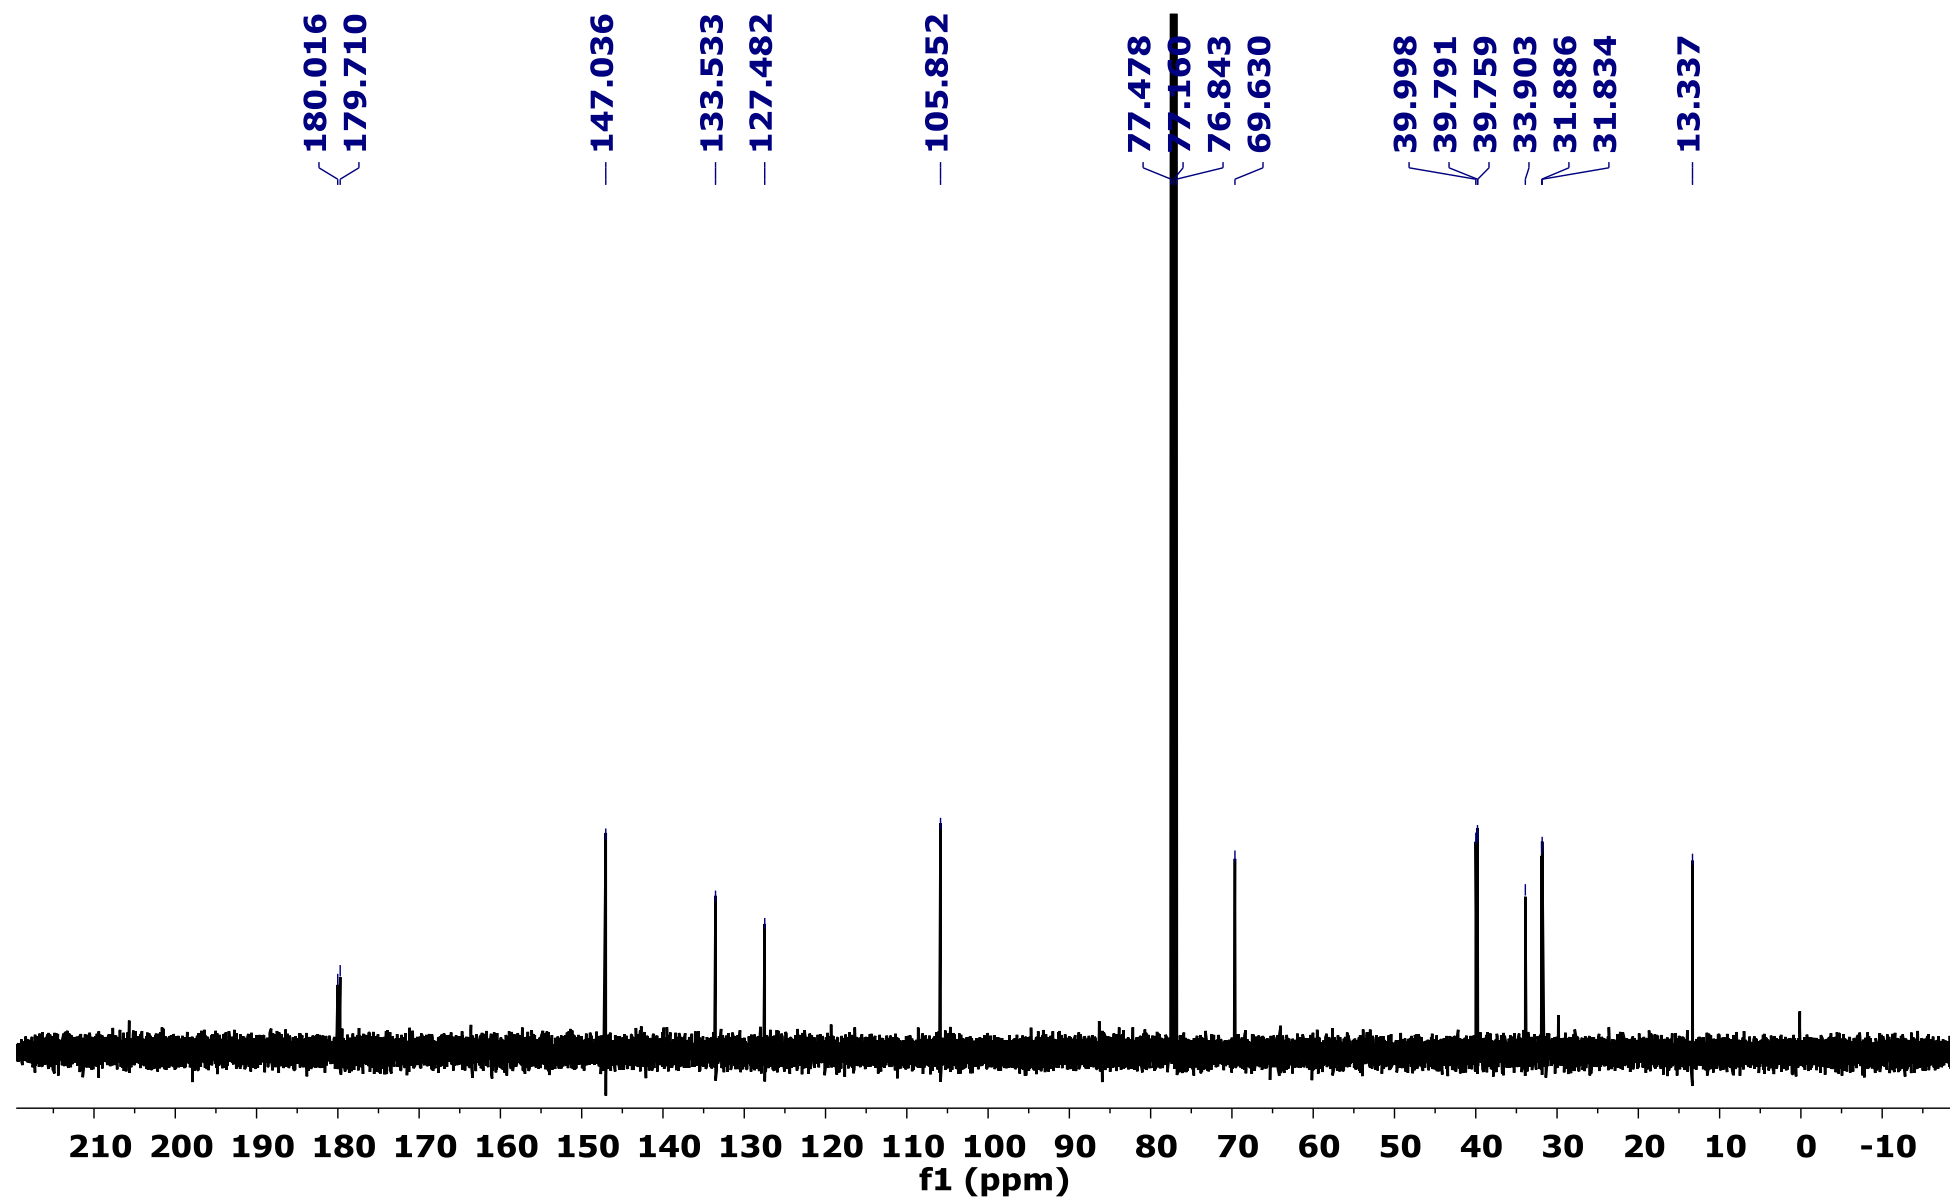

S88

Product 4a

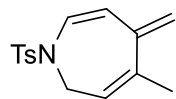

$^1\text{H}$  NMR (400 MHz,  $\text{CDCl}_3$ )

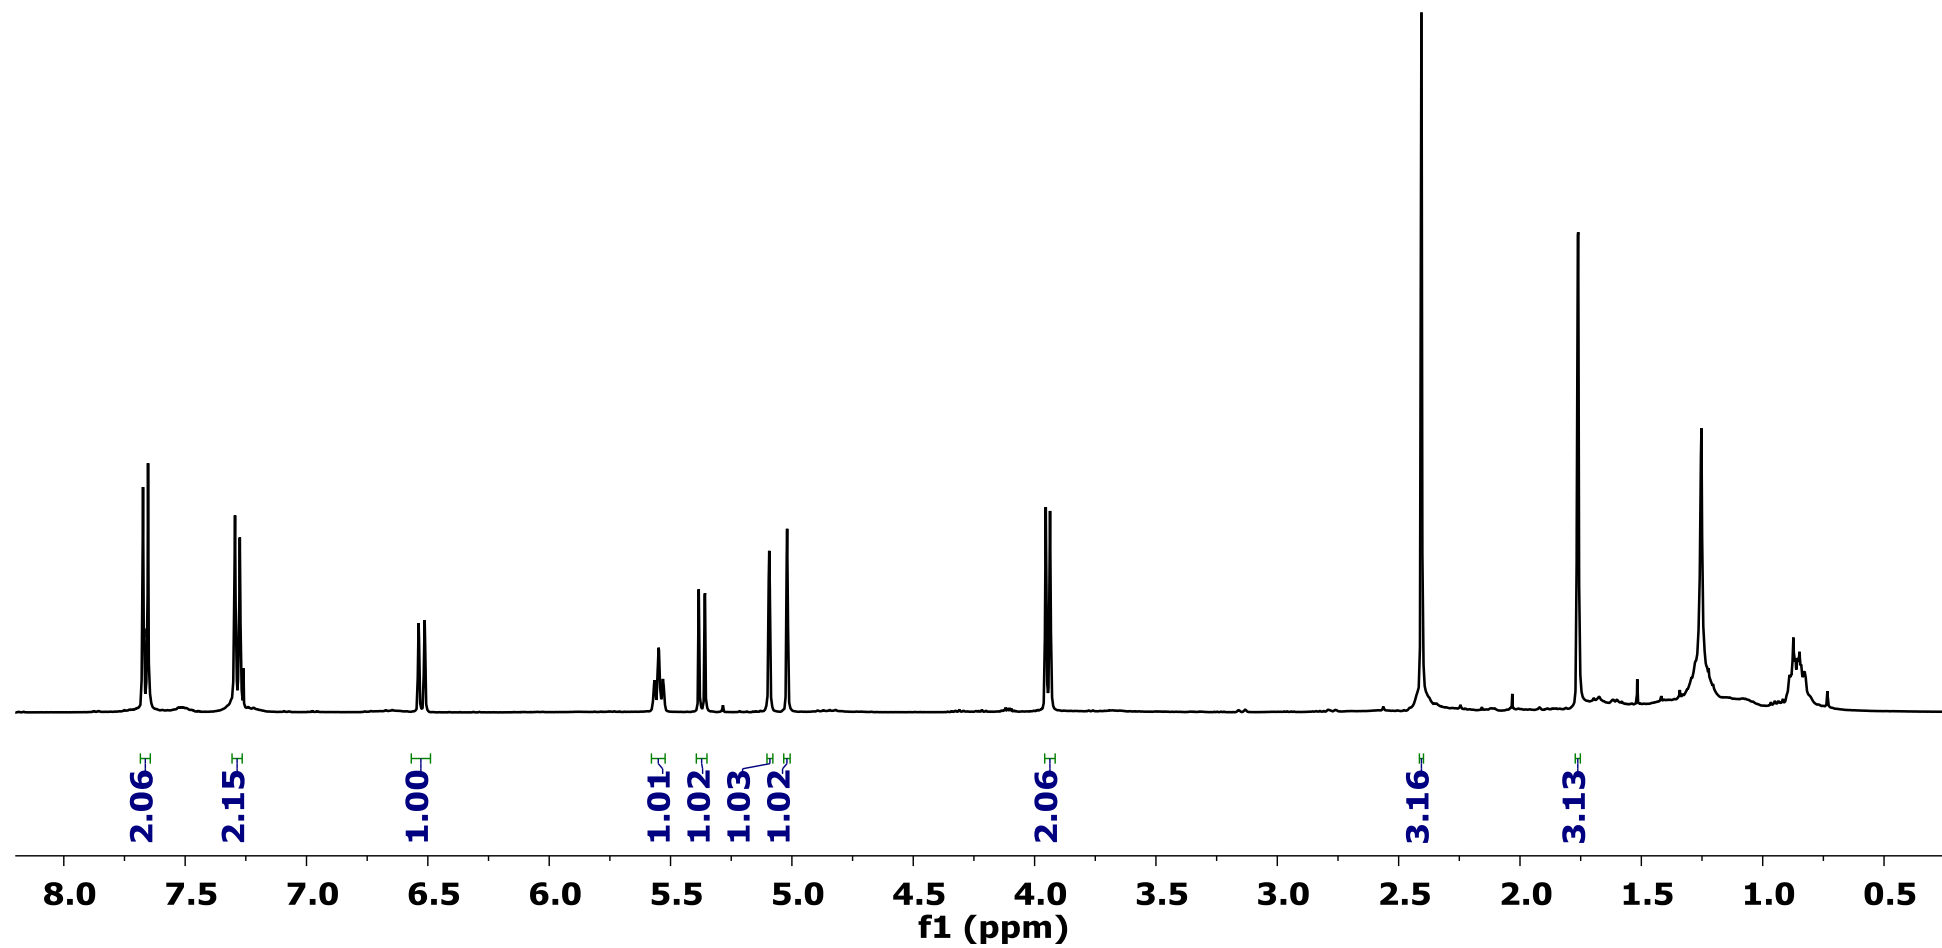

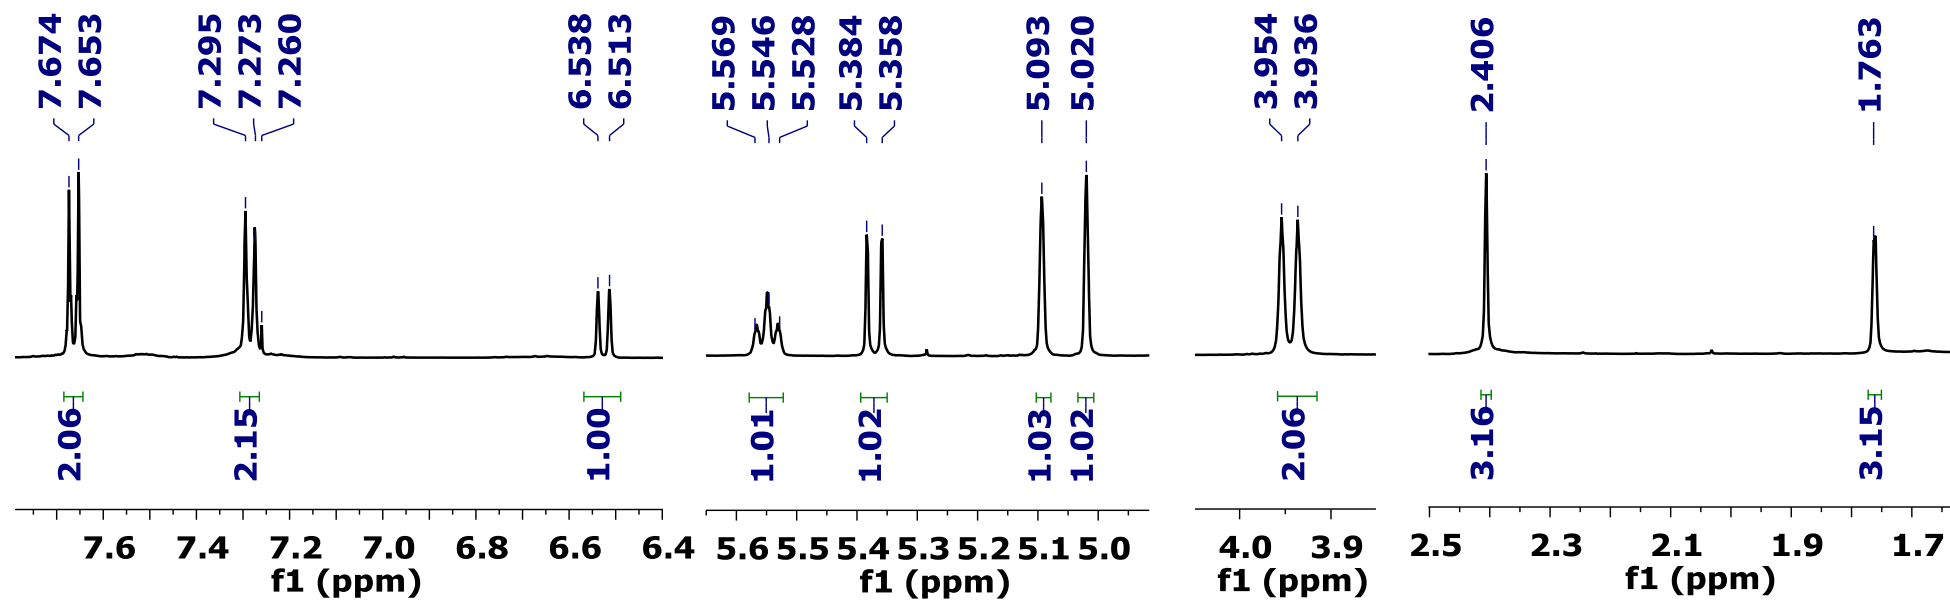

<sup>13</sup>C NMR (101 MHz, CDCl<sub>3</sub>)

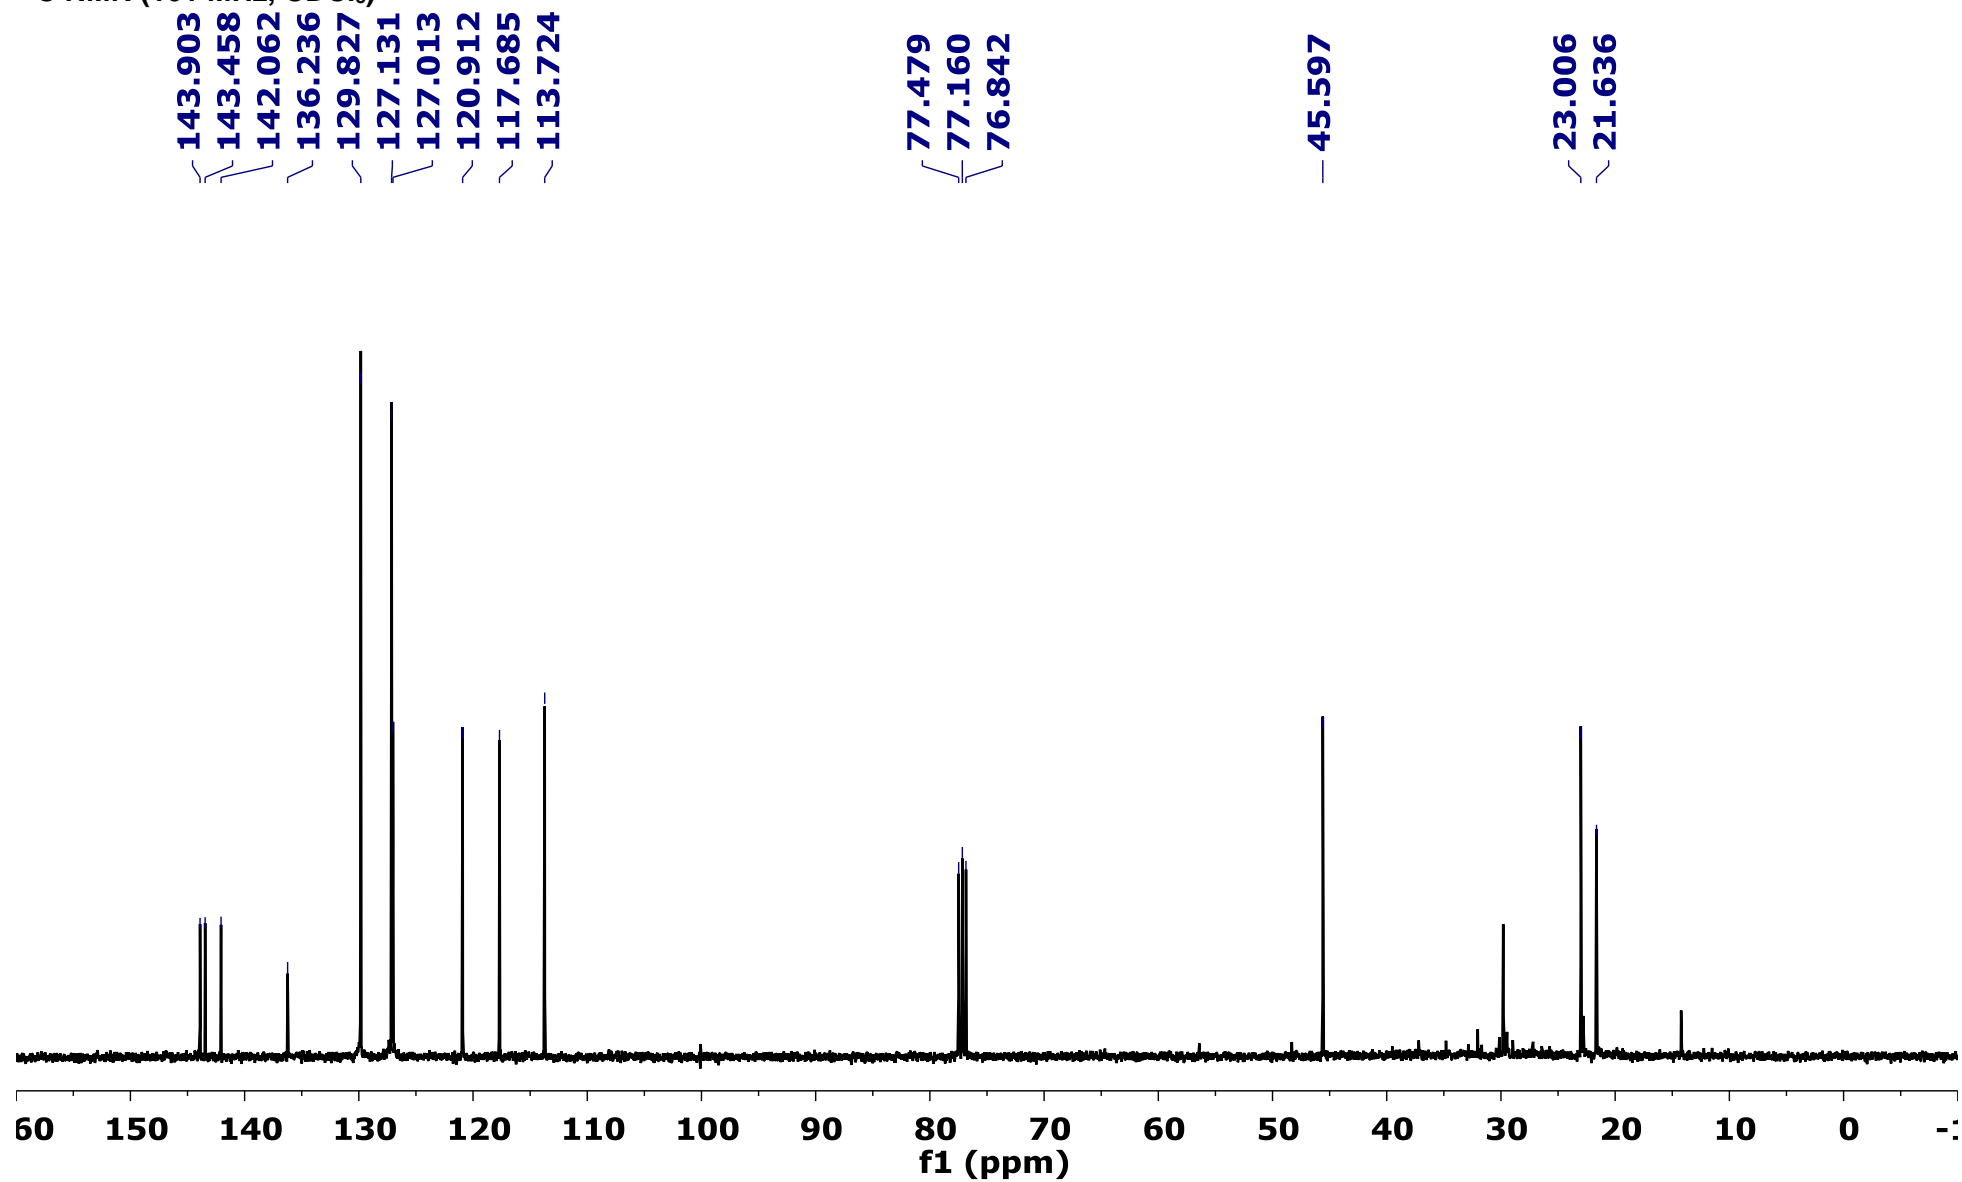

2D NMR HSQC

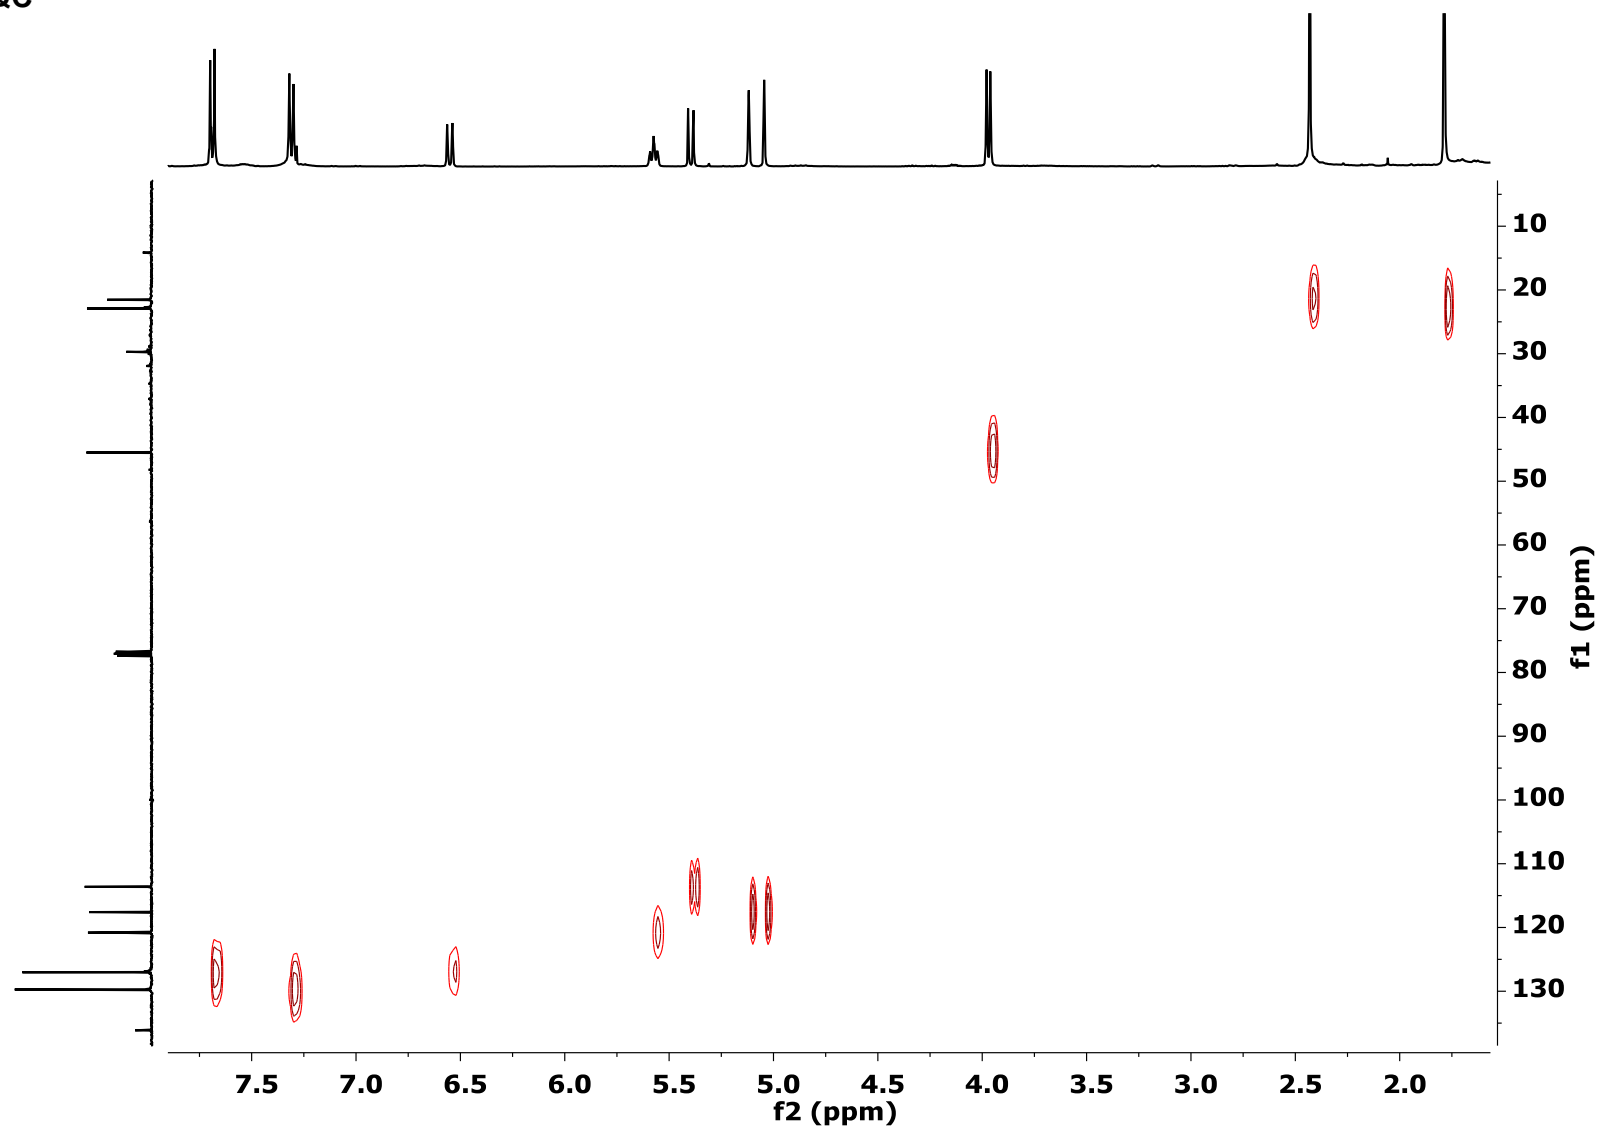



# 2D NMR HMBC

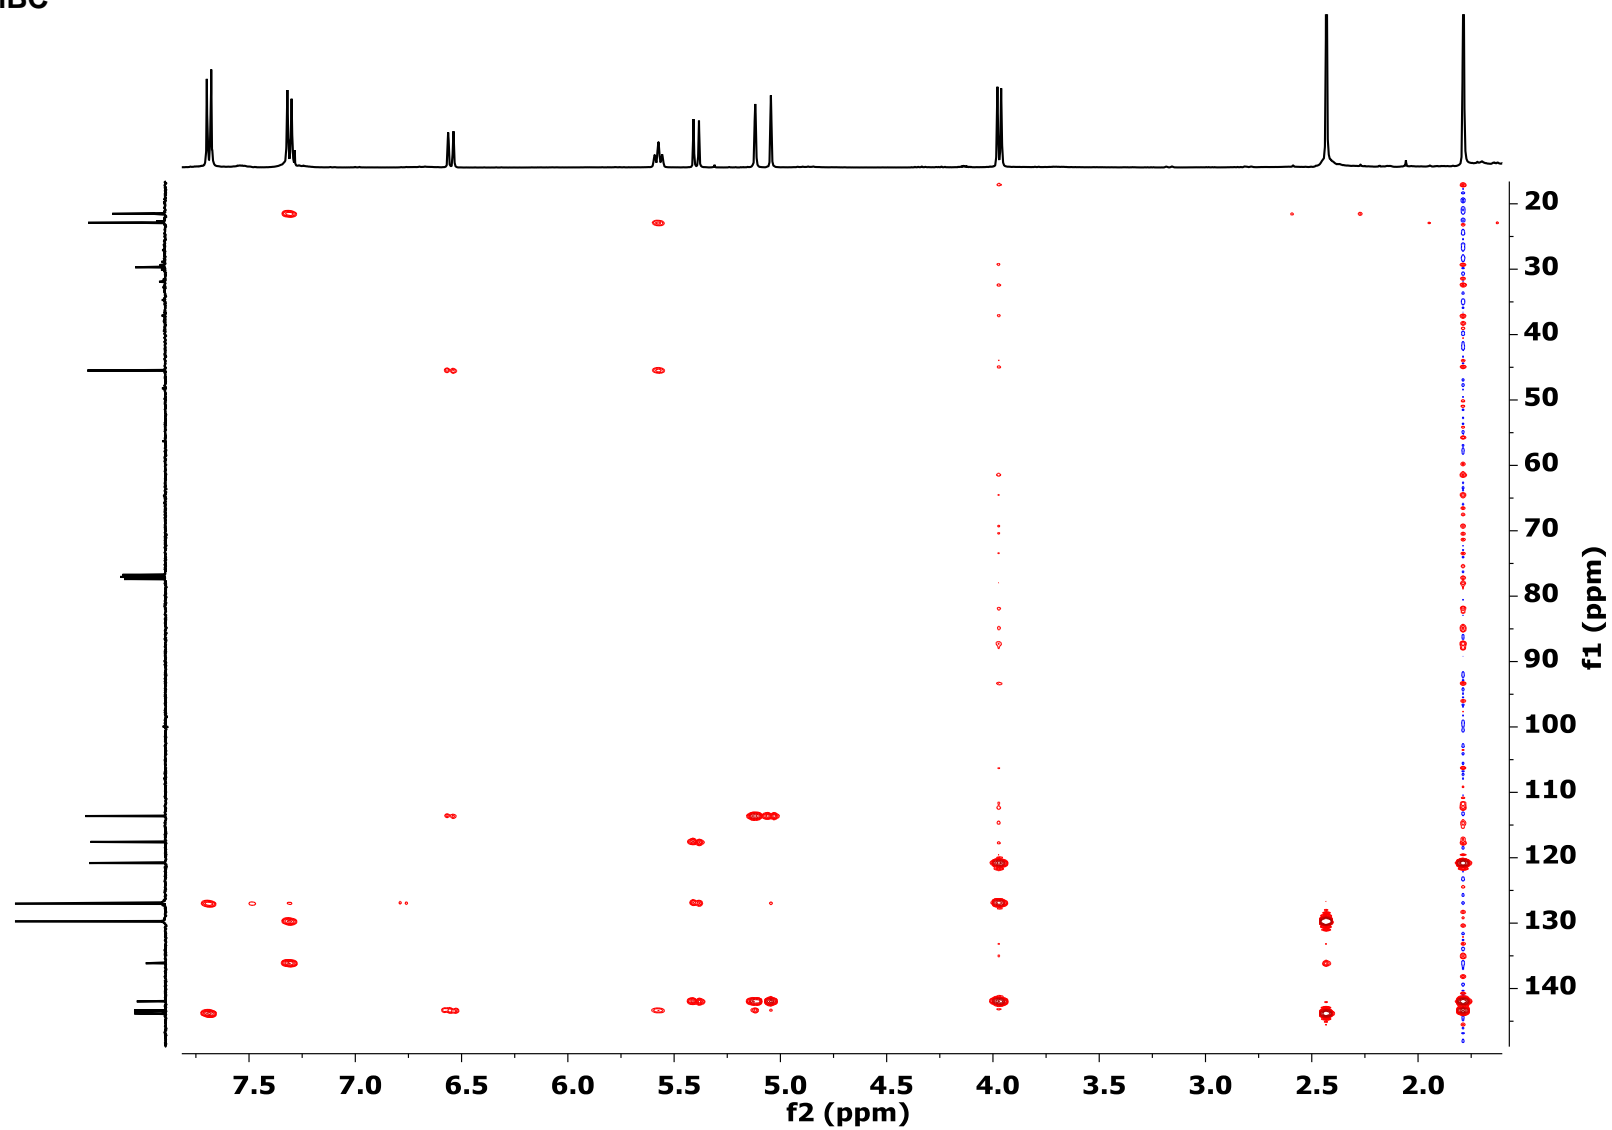

# 2D NMR COSY

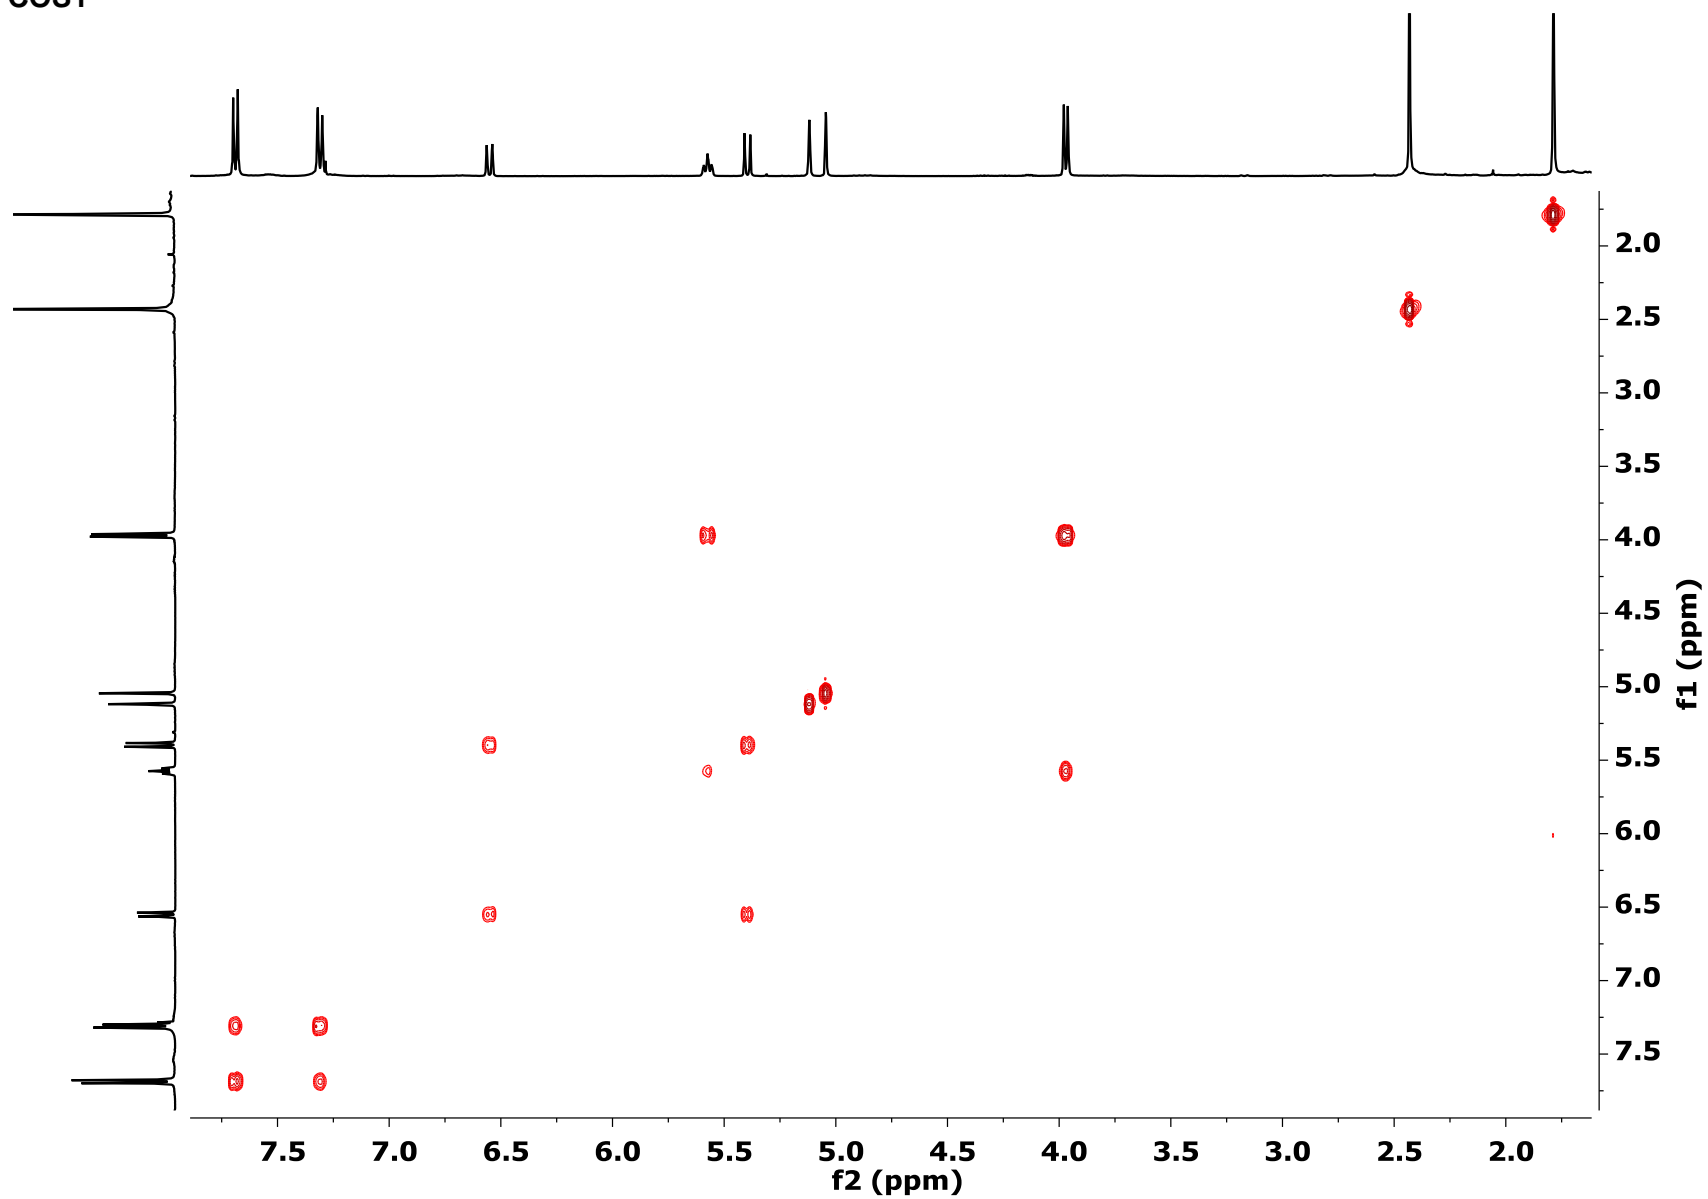

S94

Product 5a

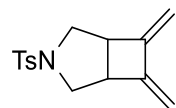

$^1\text{H}$  NMR (400 MHz,  $\text{CDCl}_3$ )

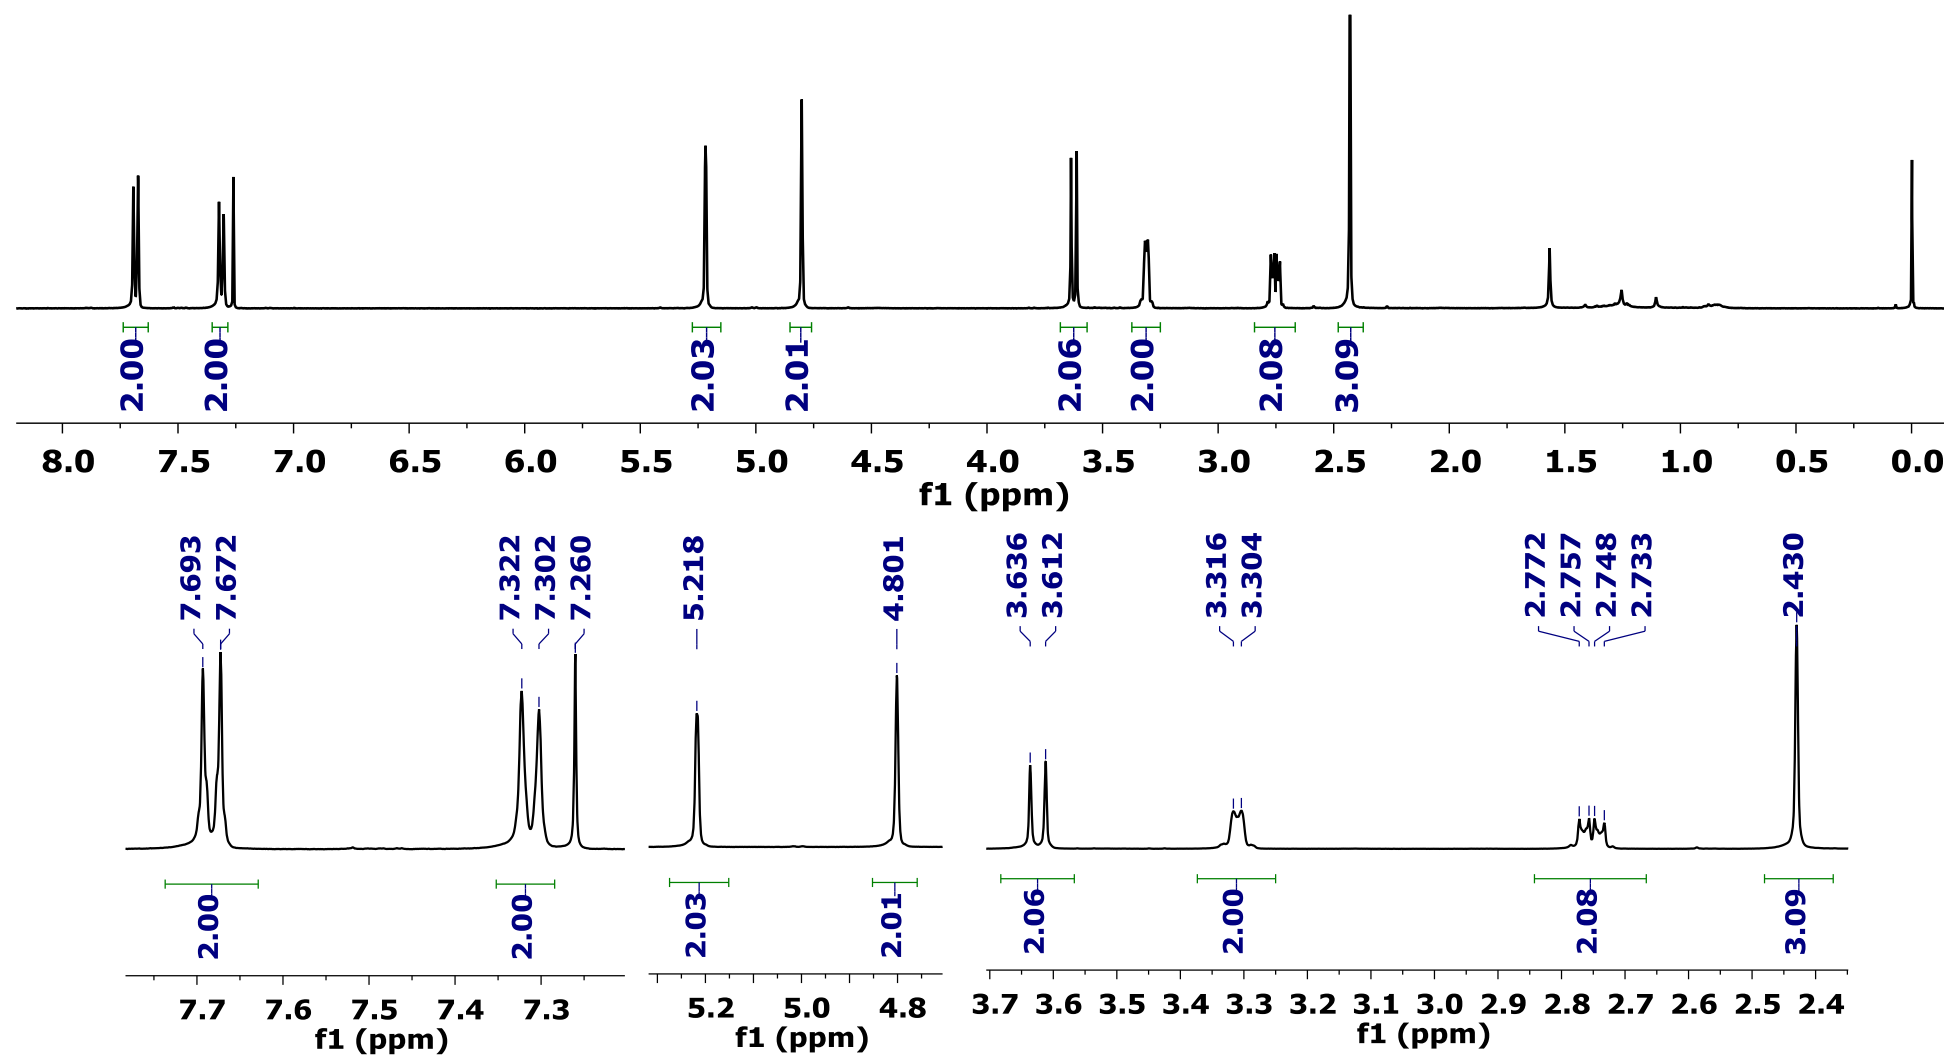

<sup>13</sup>C NMR (101 MHz, CDCl<sub>3</sub>)

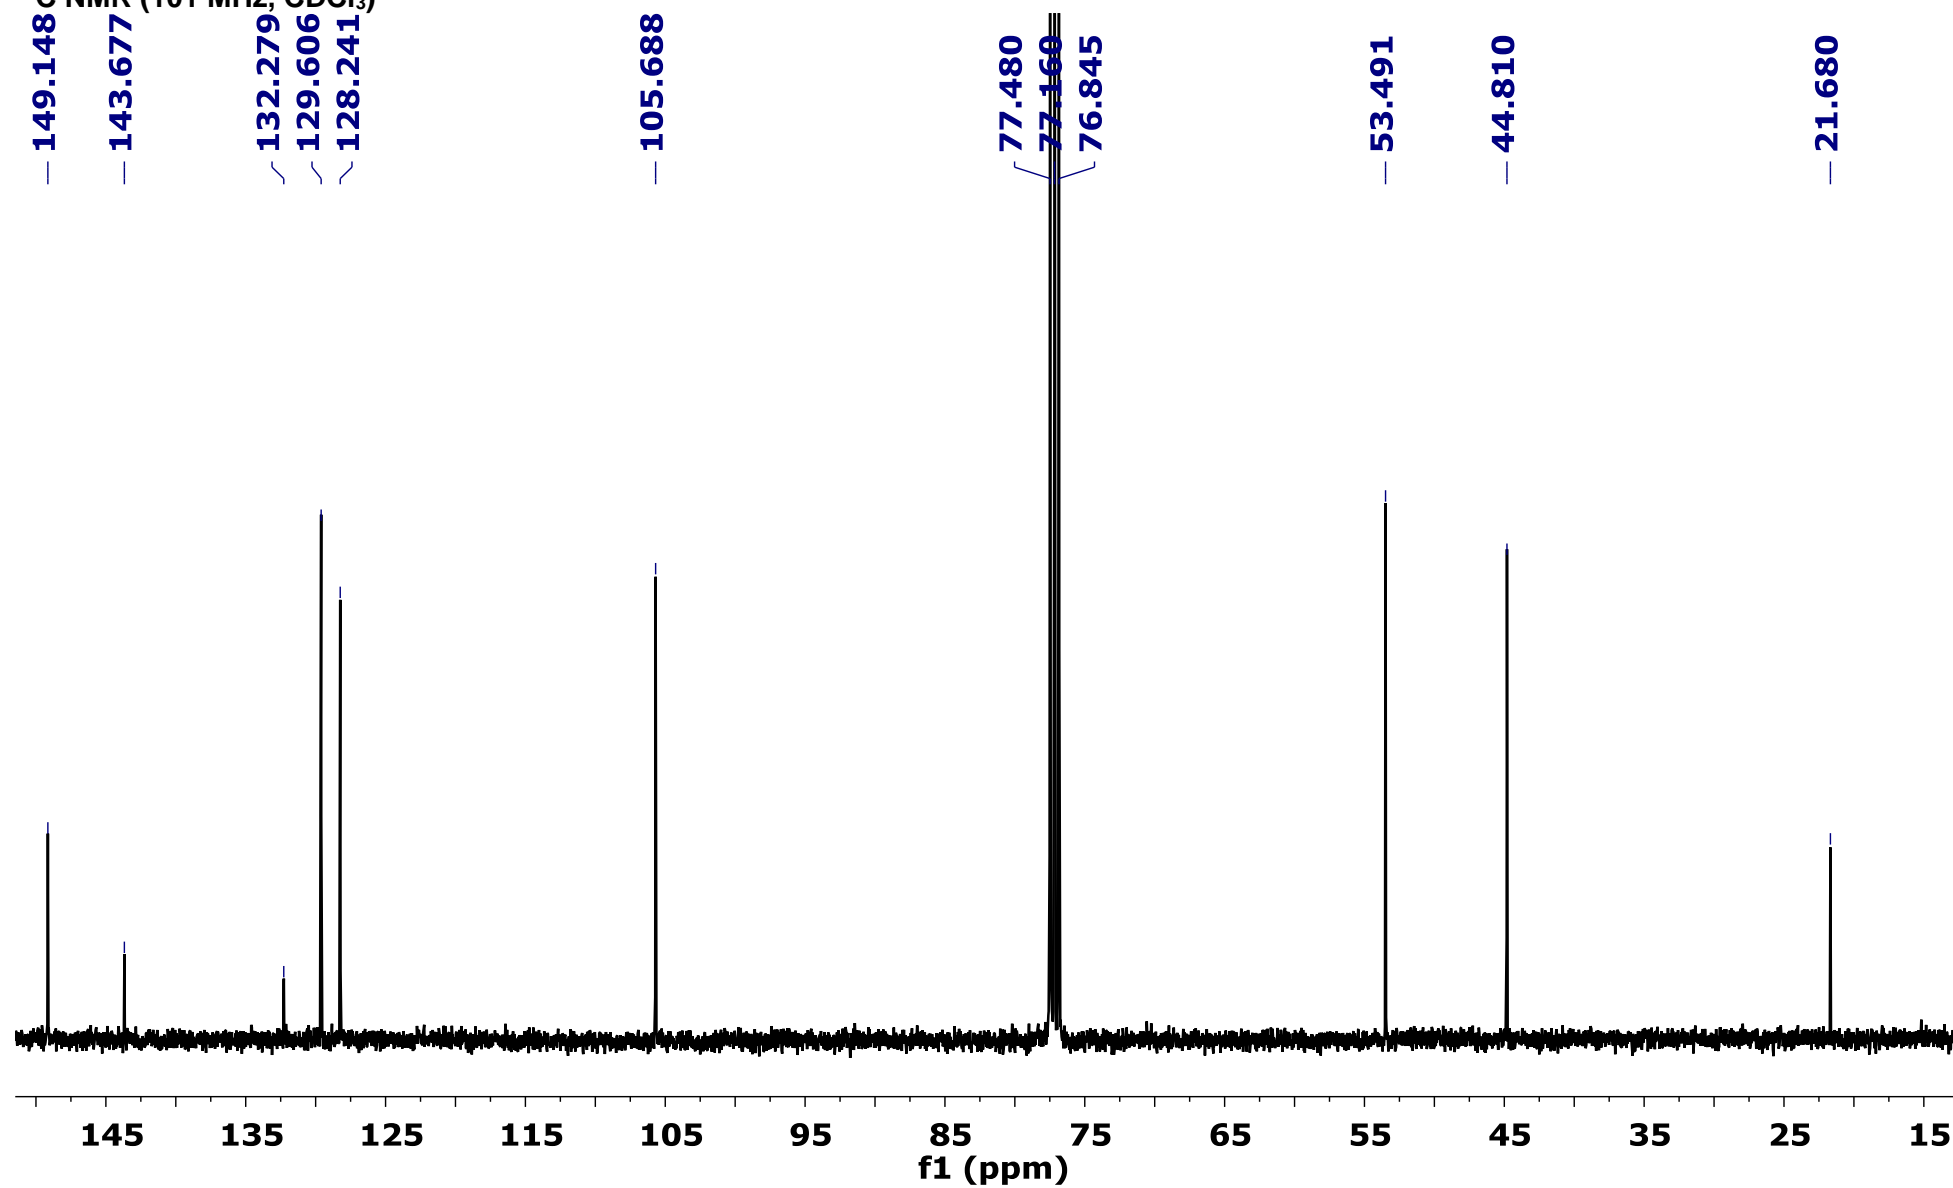

**Product 6a**

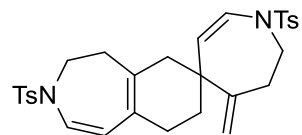

**$^1\text{H}$  NMR (400 MHz,  $\text{CDCl}_3$ )**

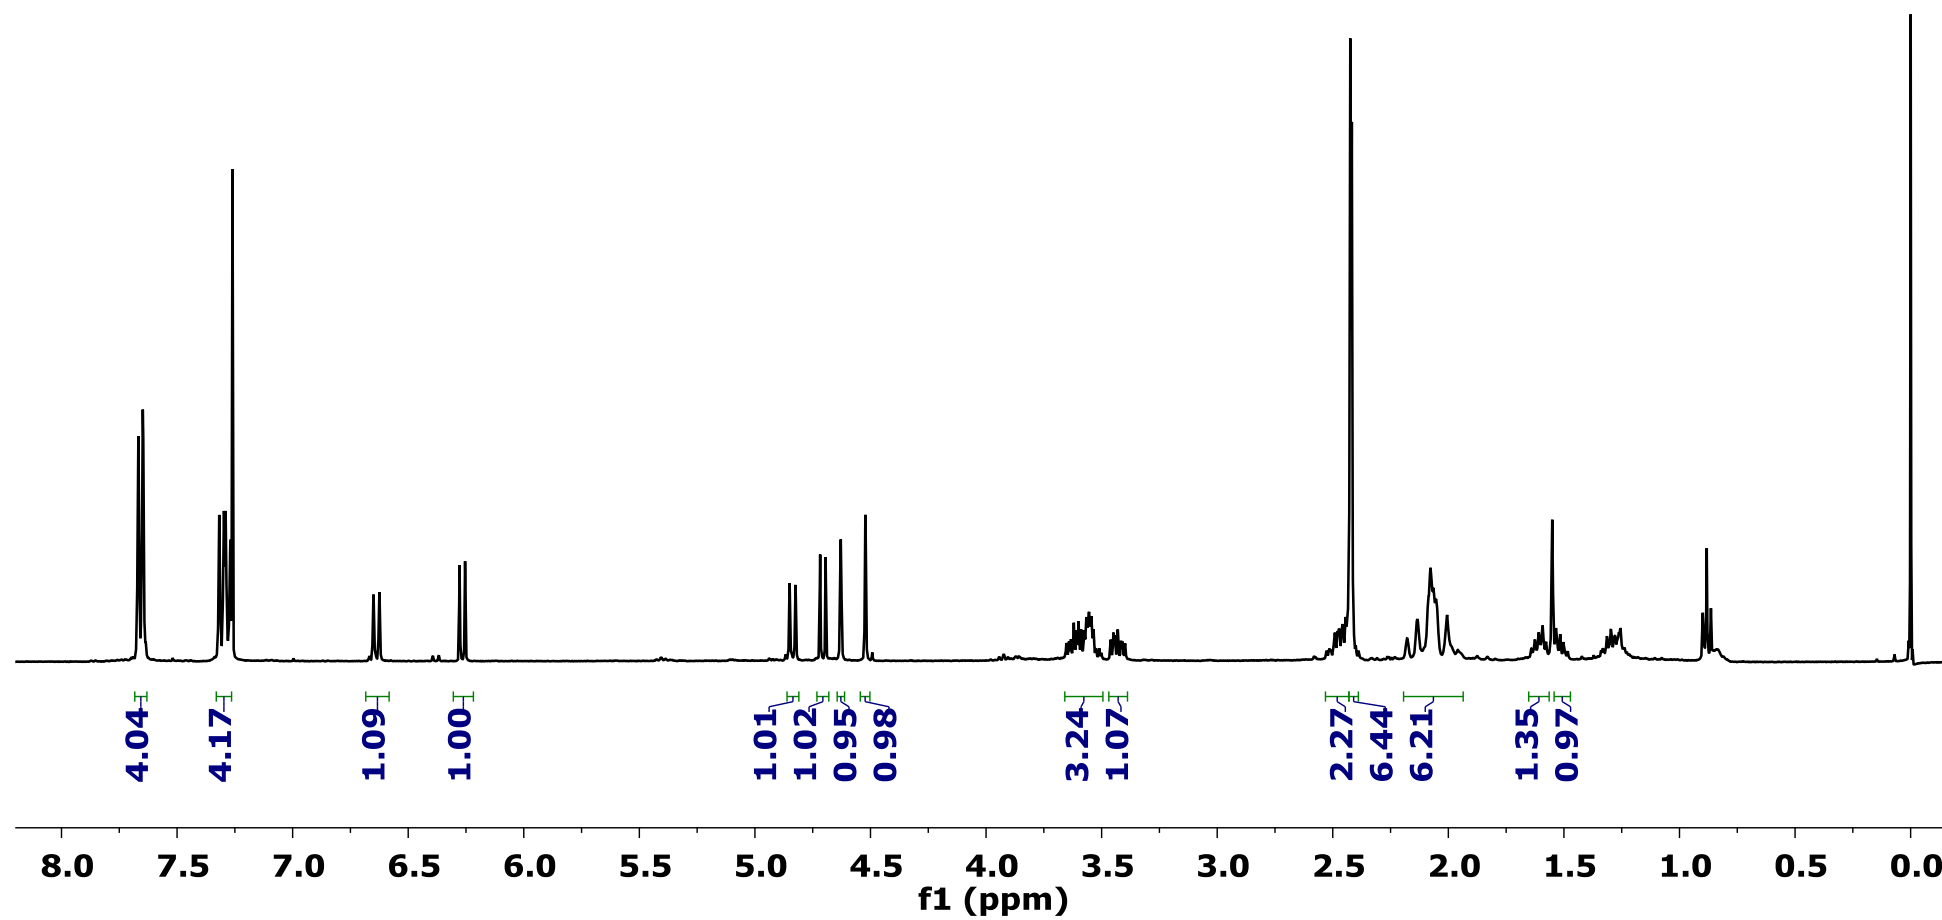

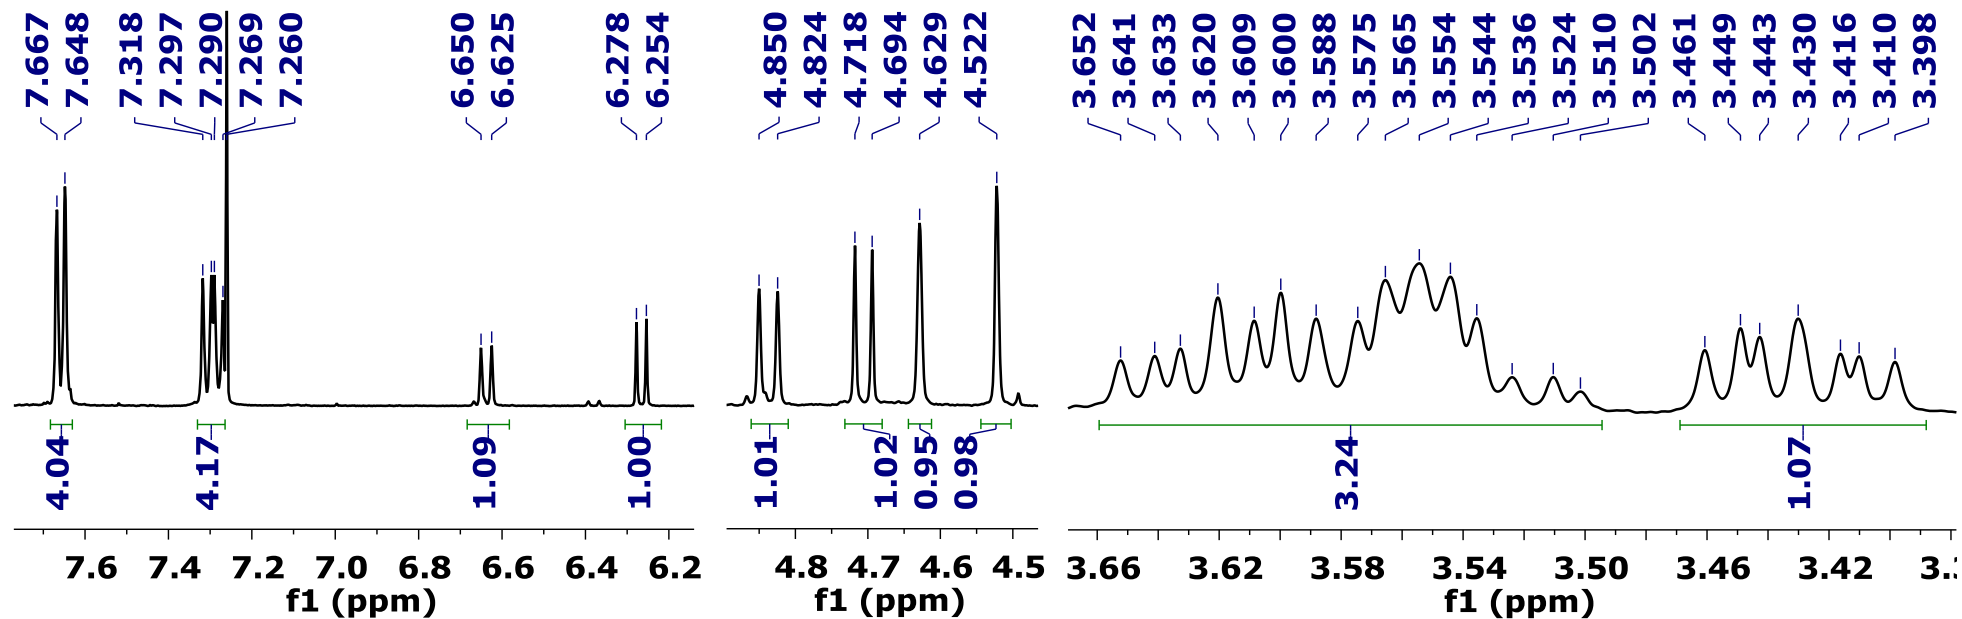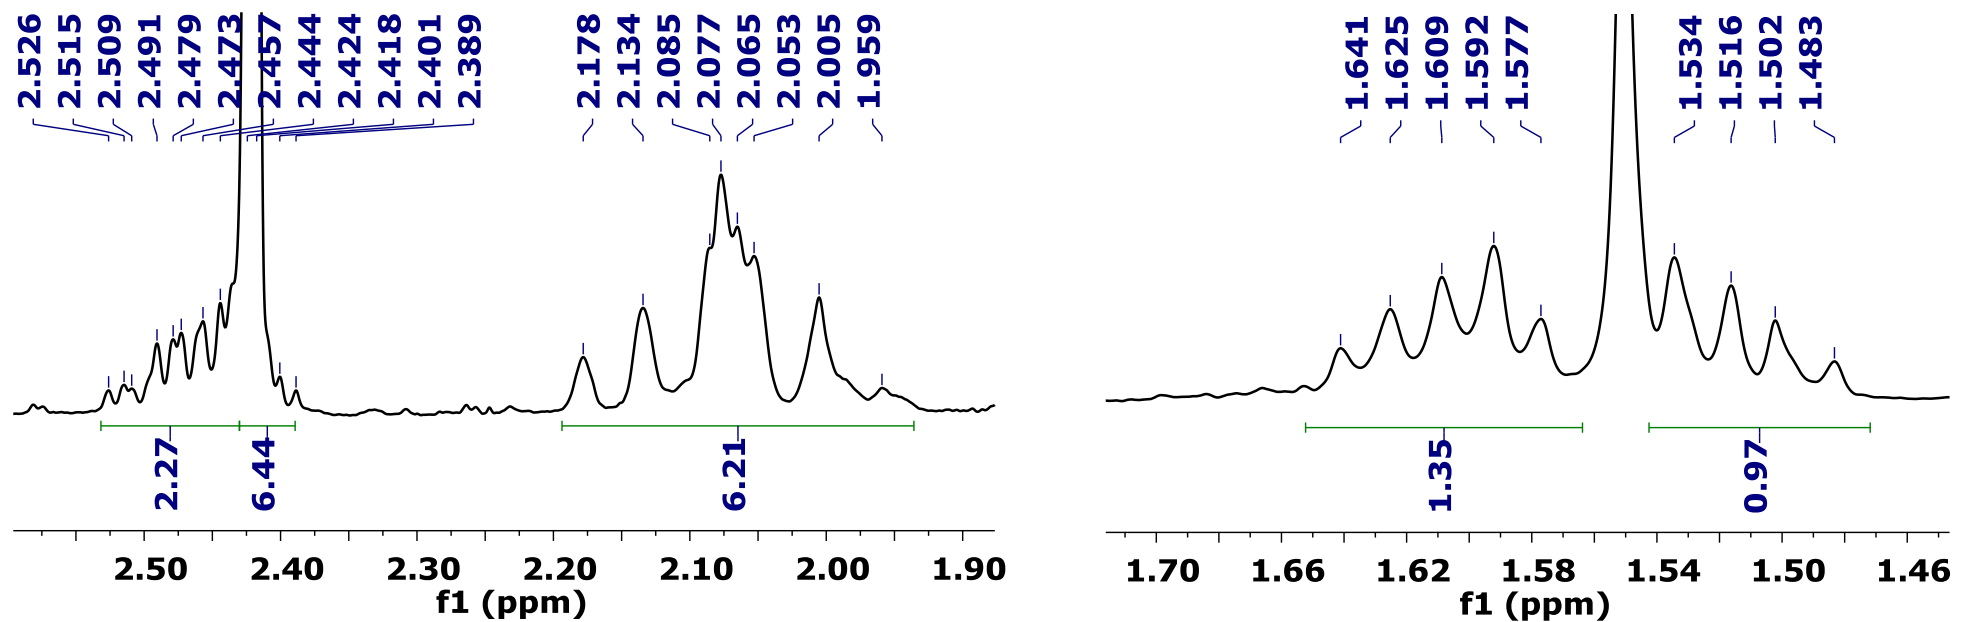

<sup>13</sup>C NMR (101 MHz, CDCl<sub>3</sub>)

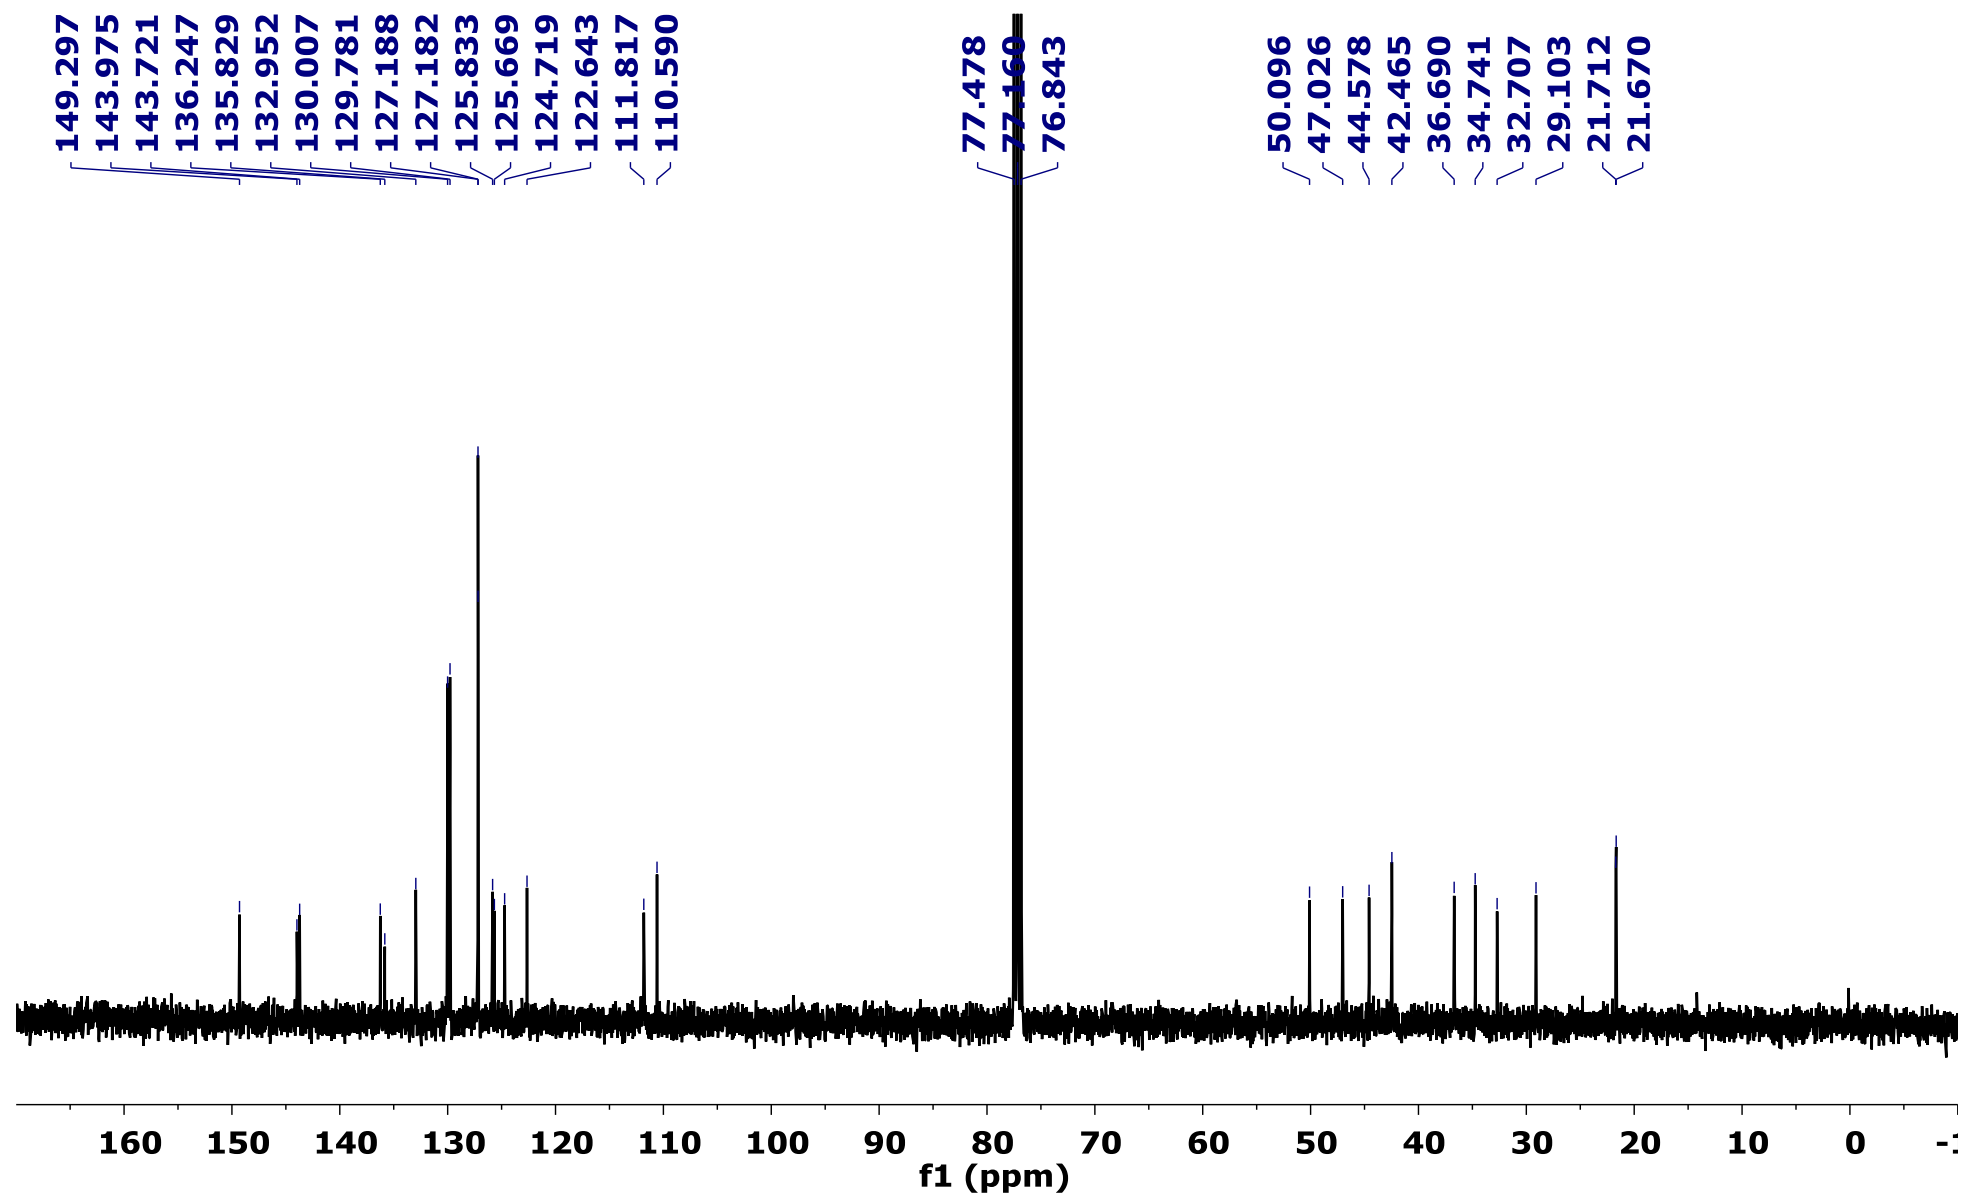

2D NMR HSQC

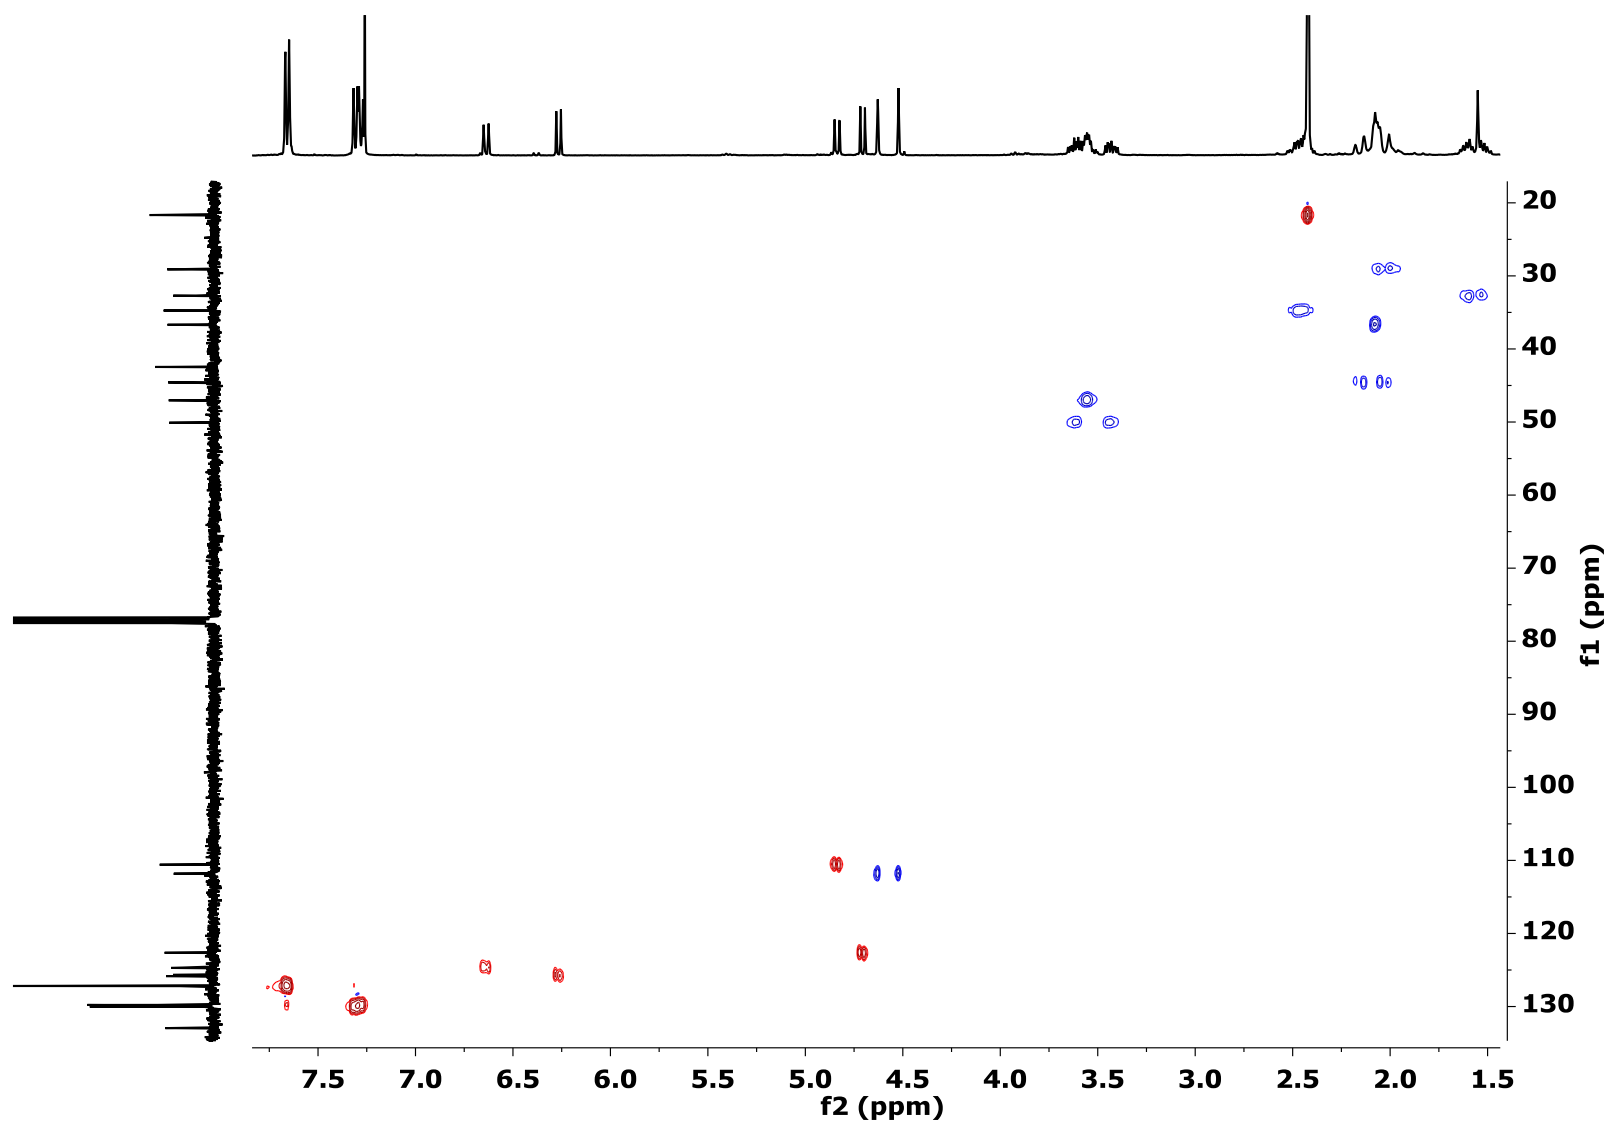



2D NMR HMBC

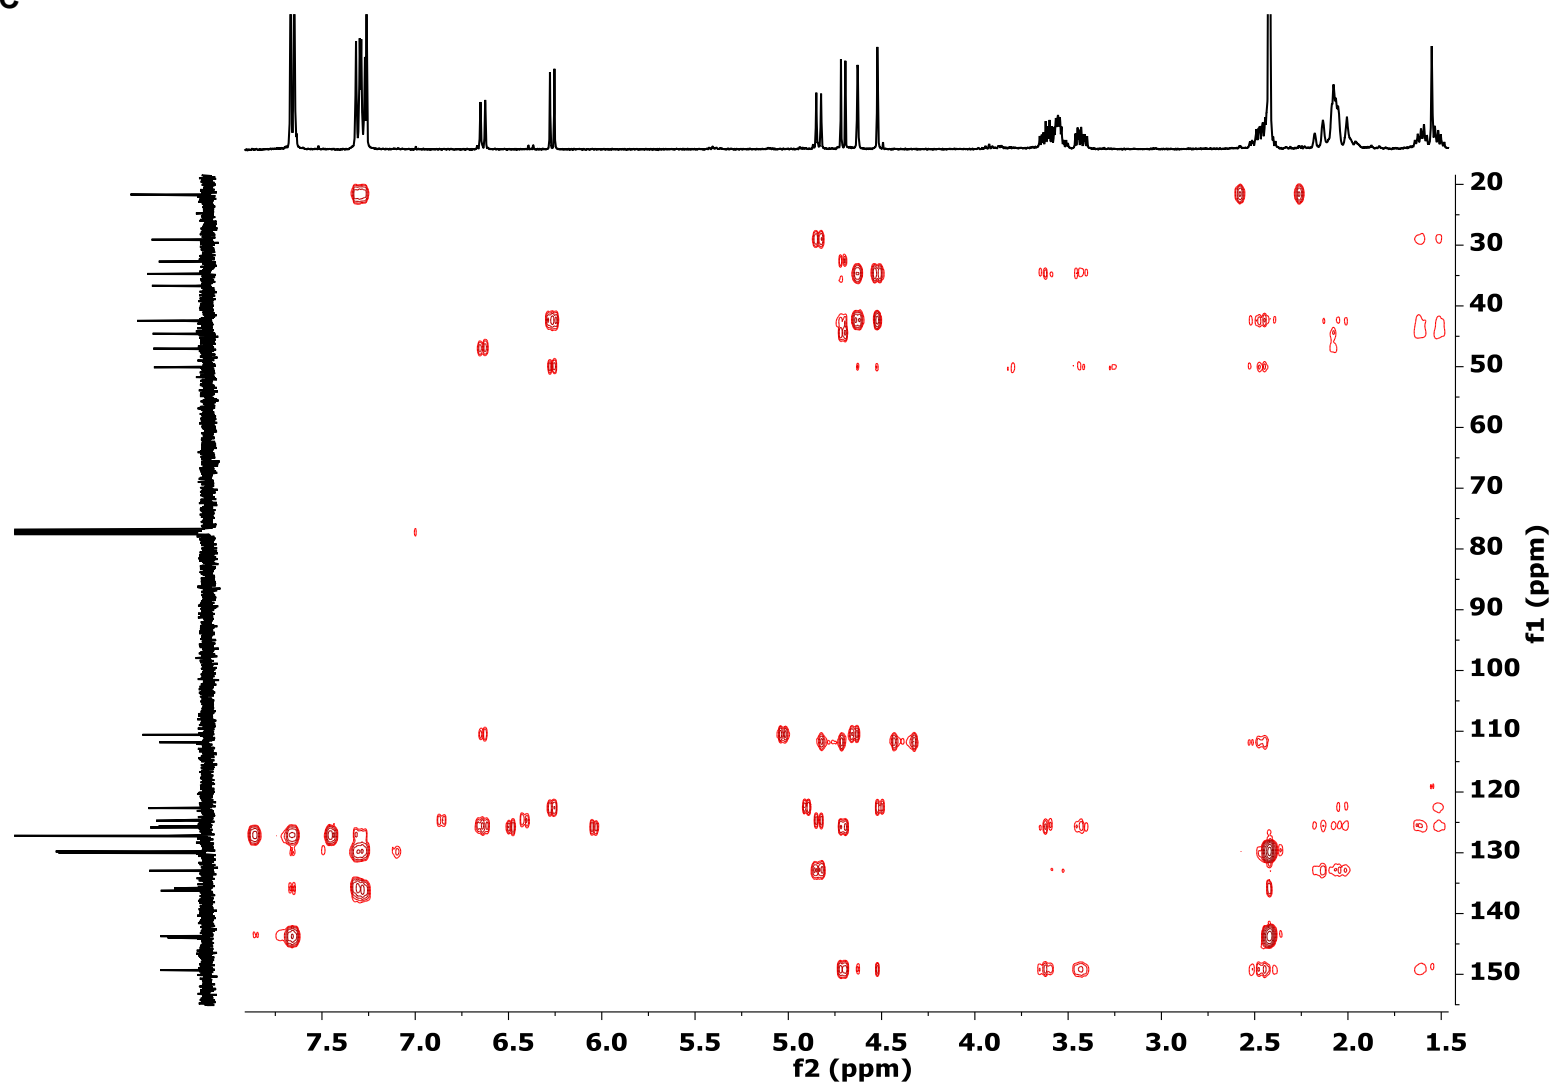

## 2D NMR COSY

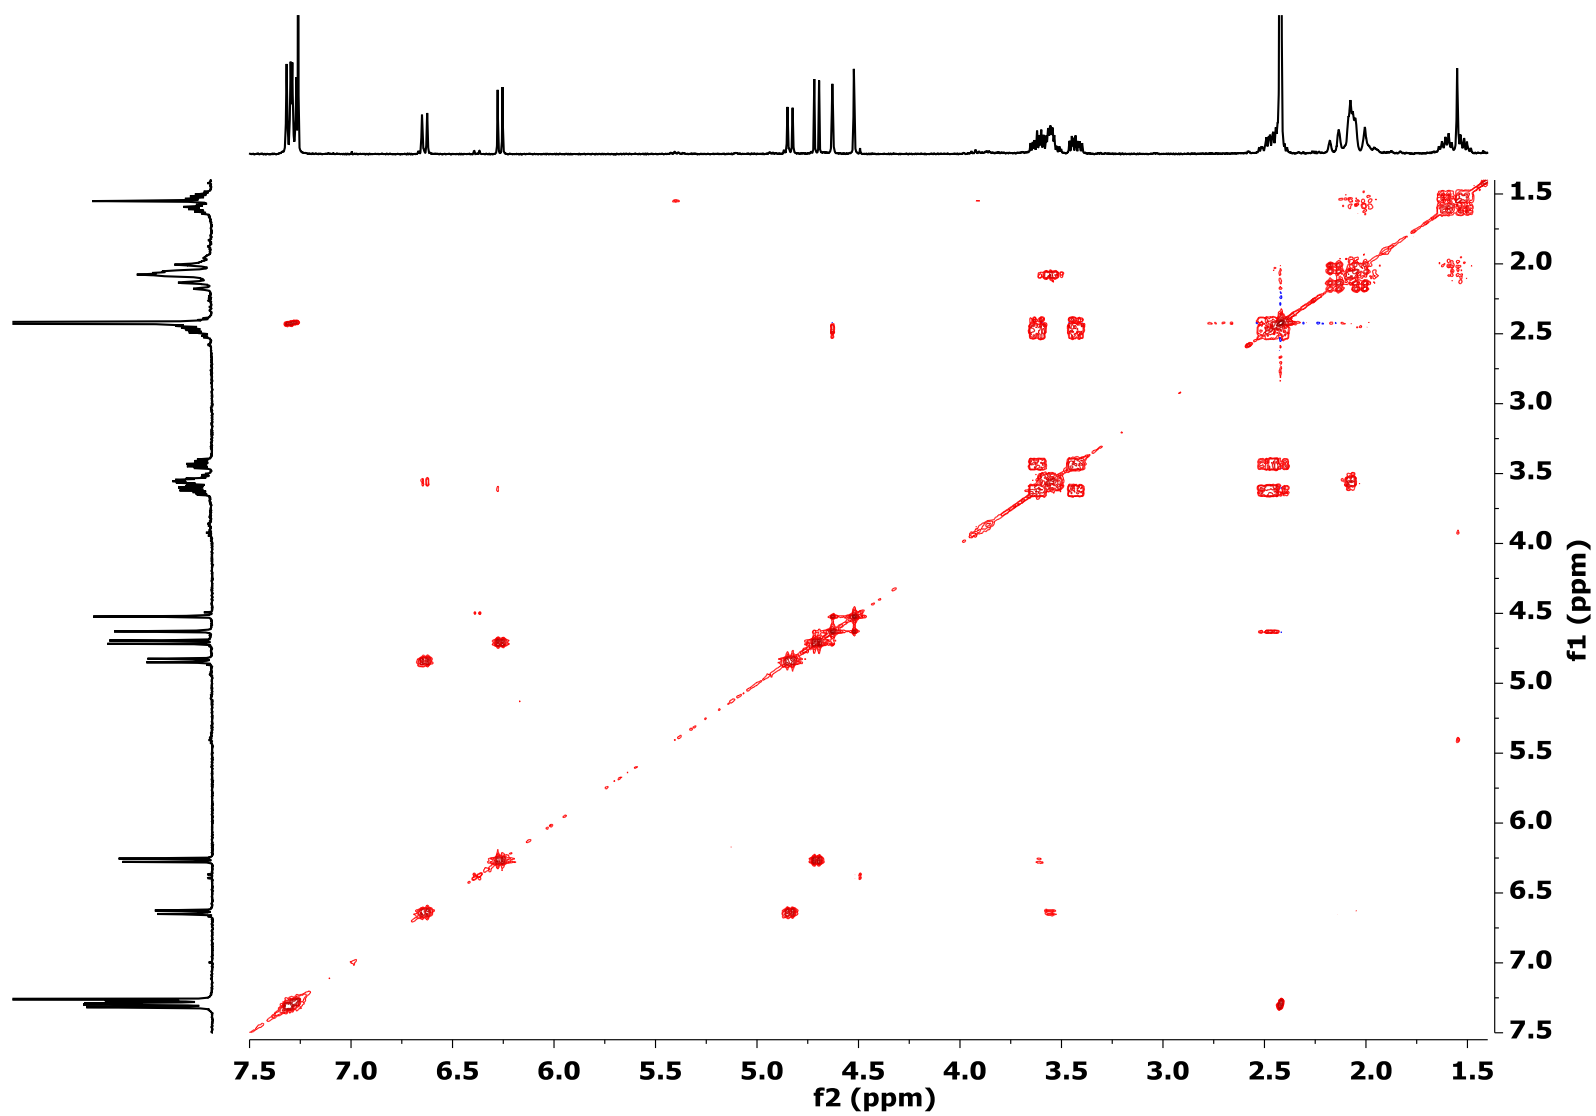

S102

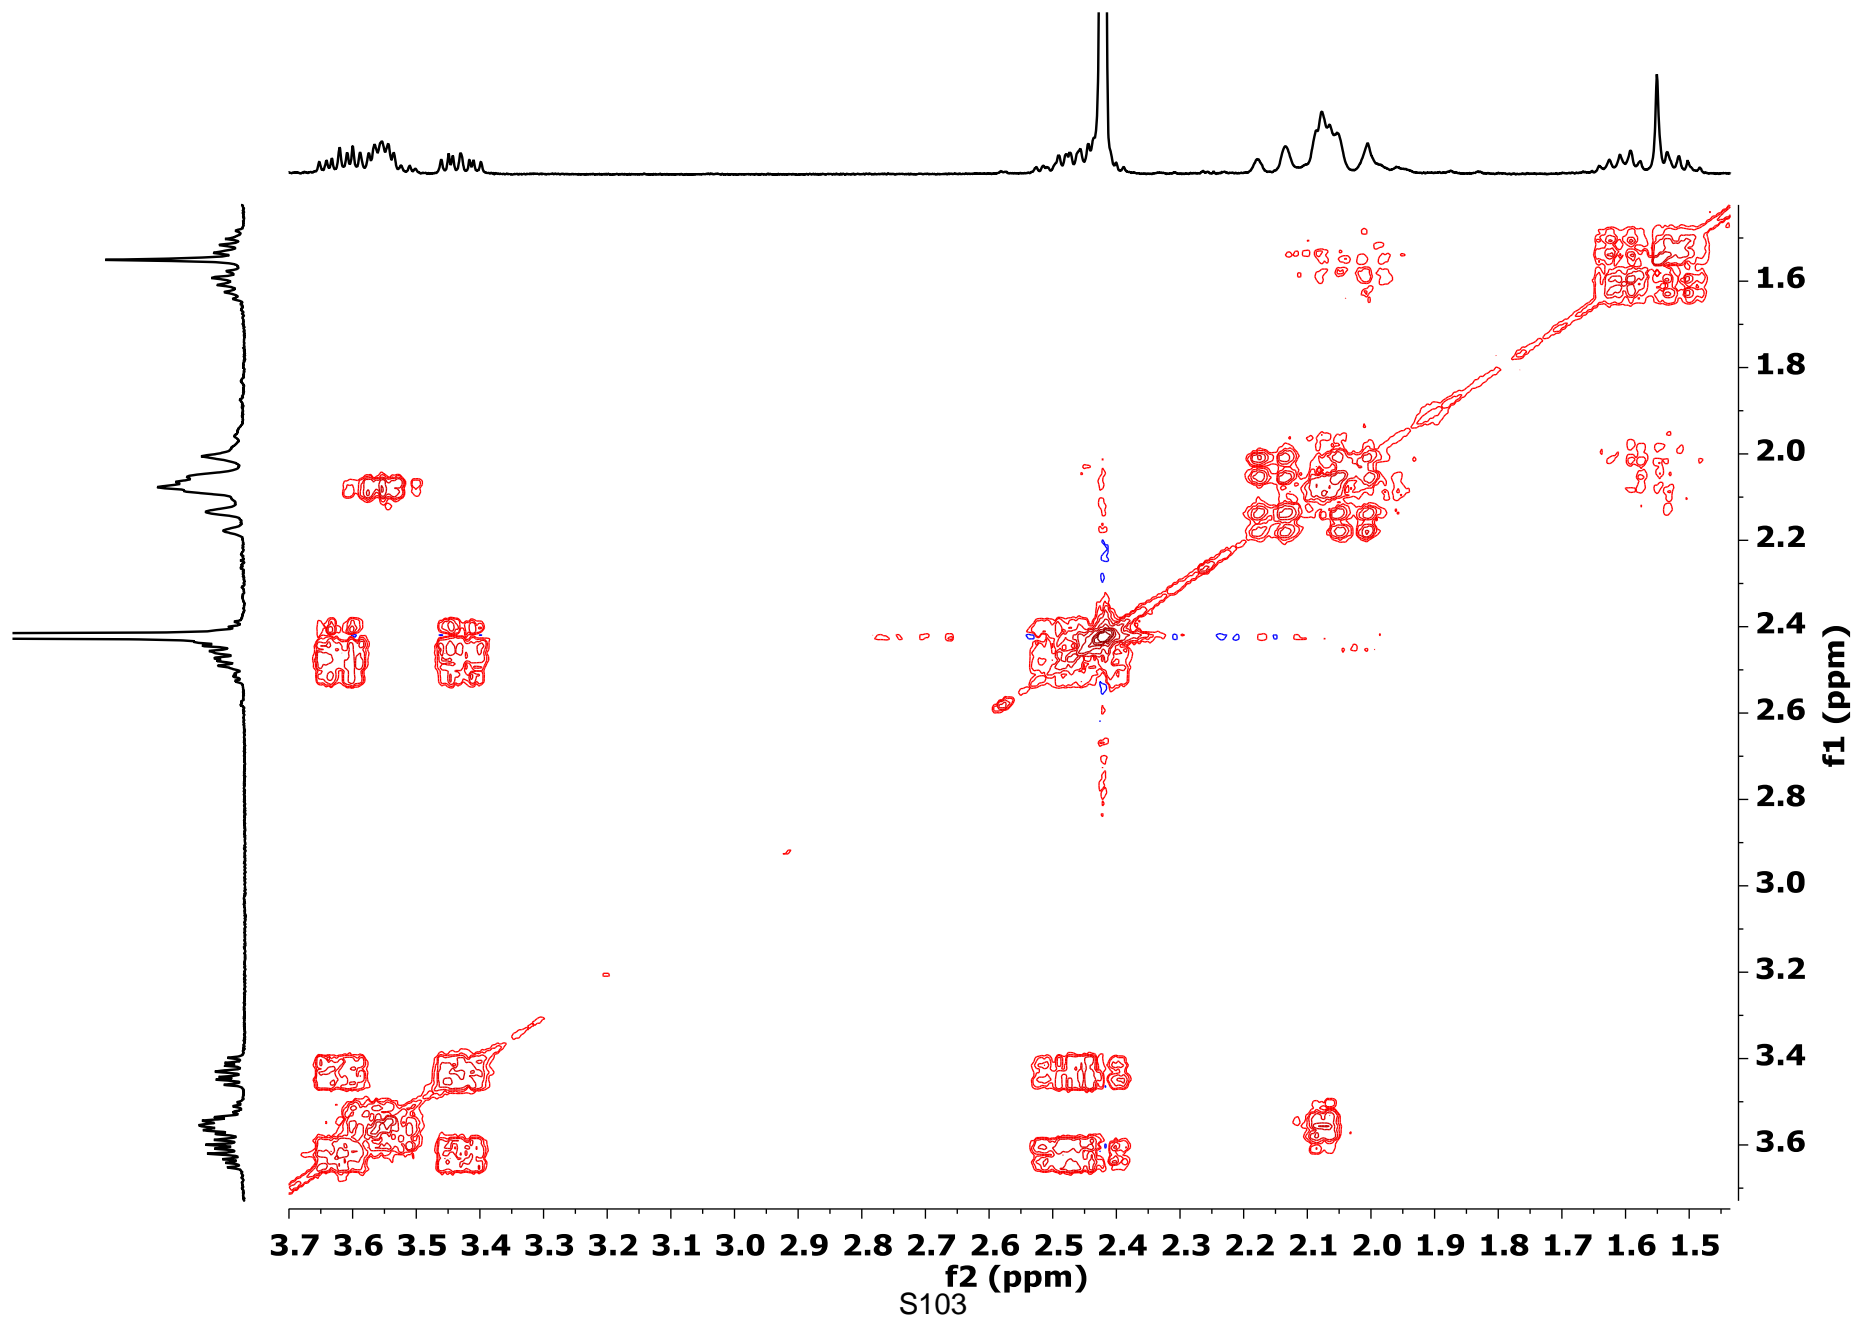

# 2D NMR NOESY

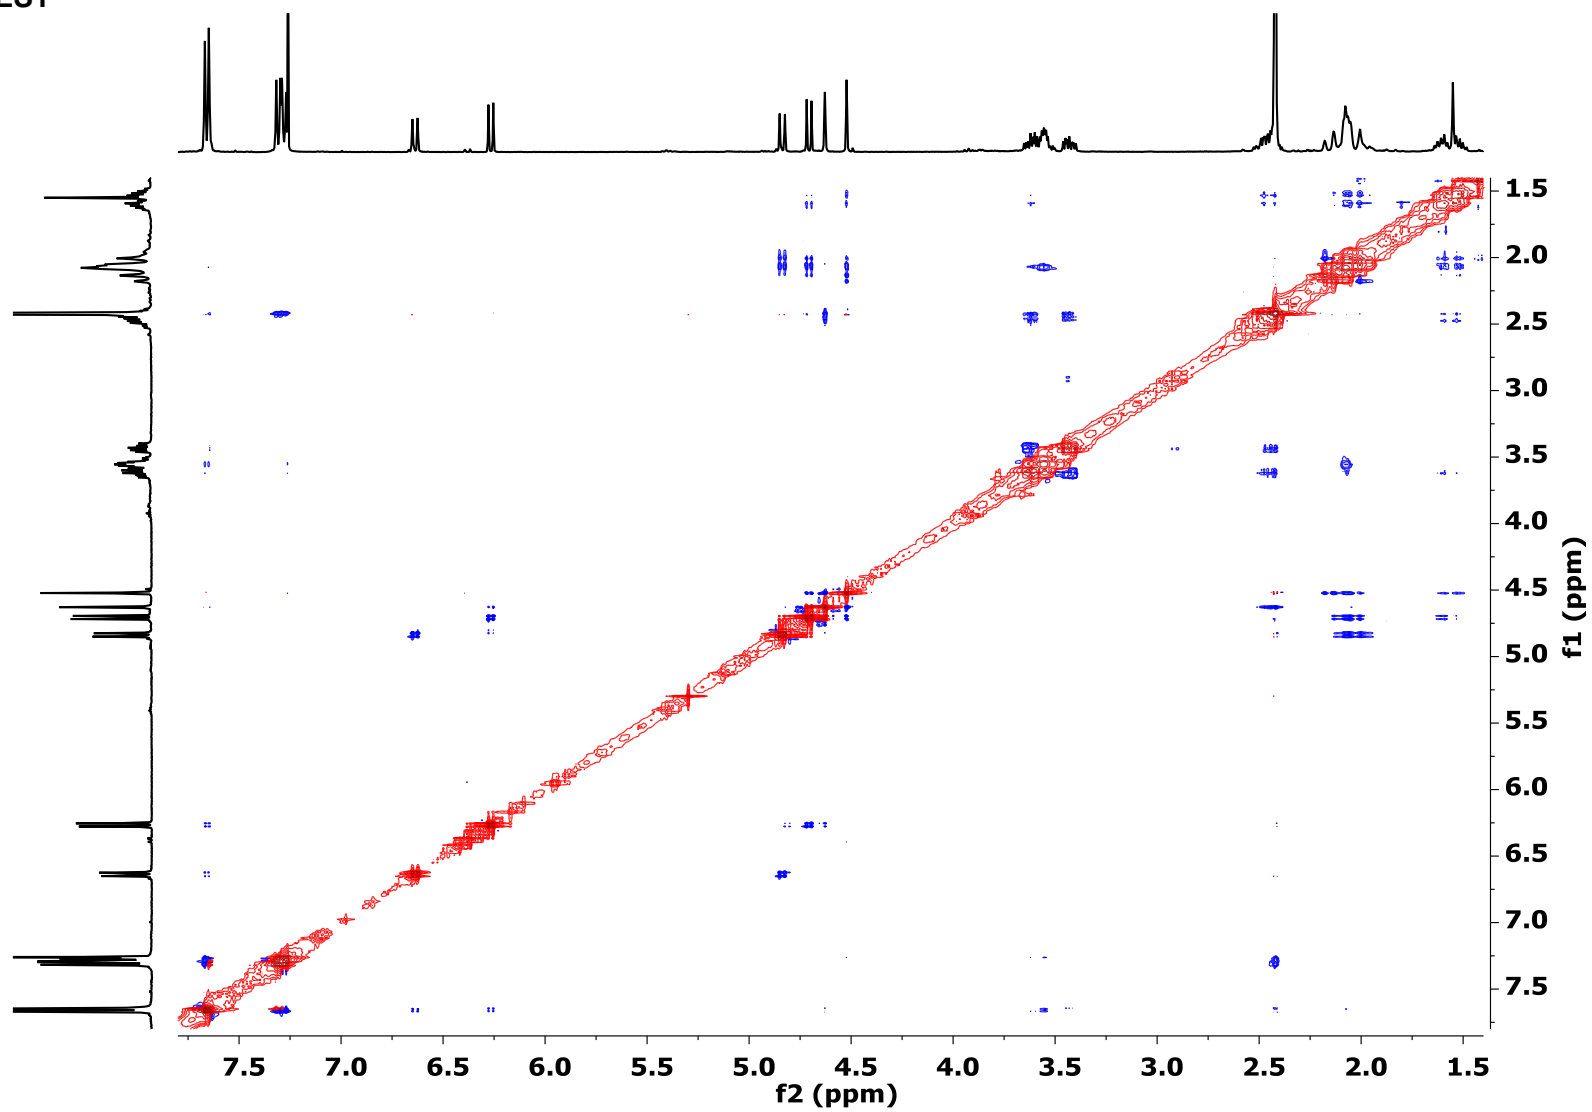

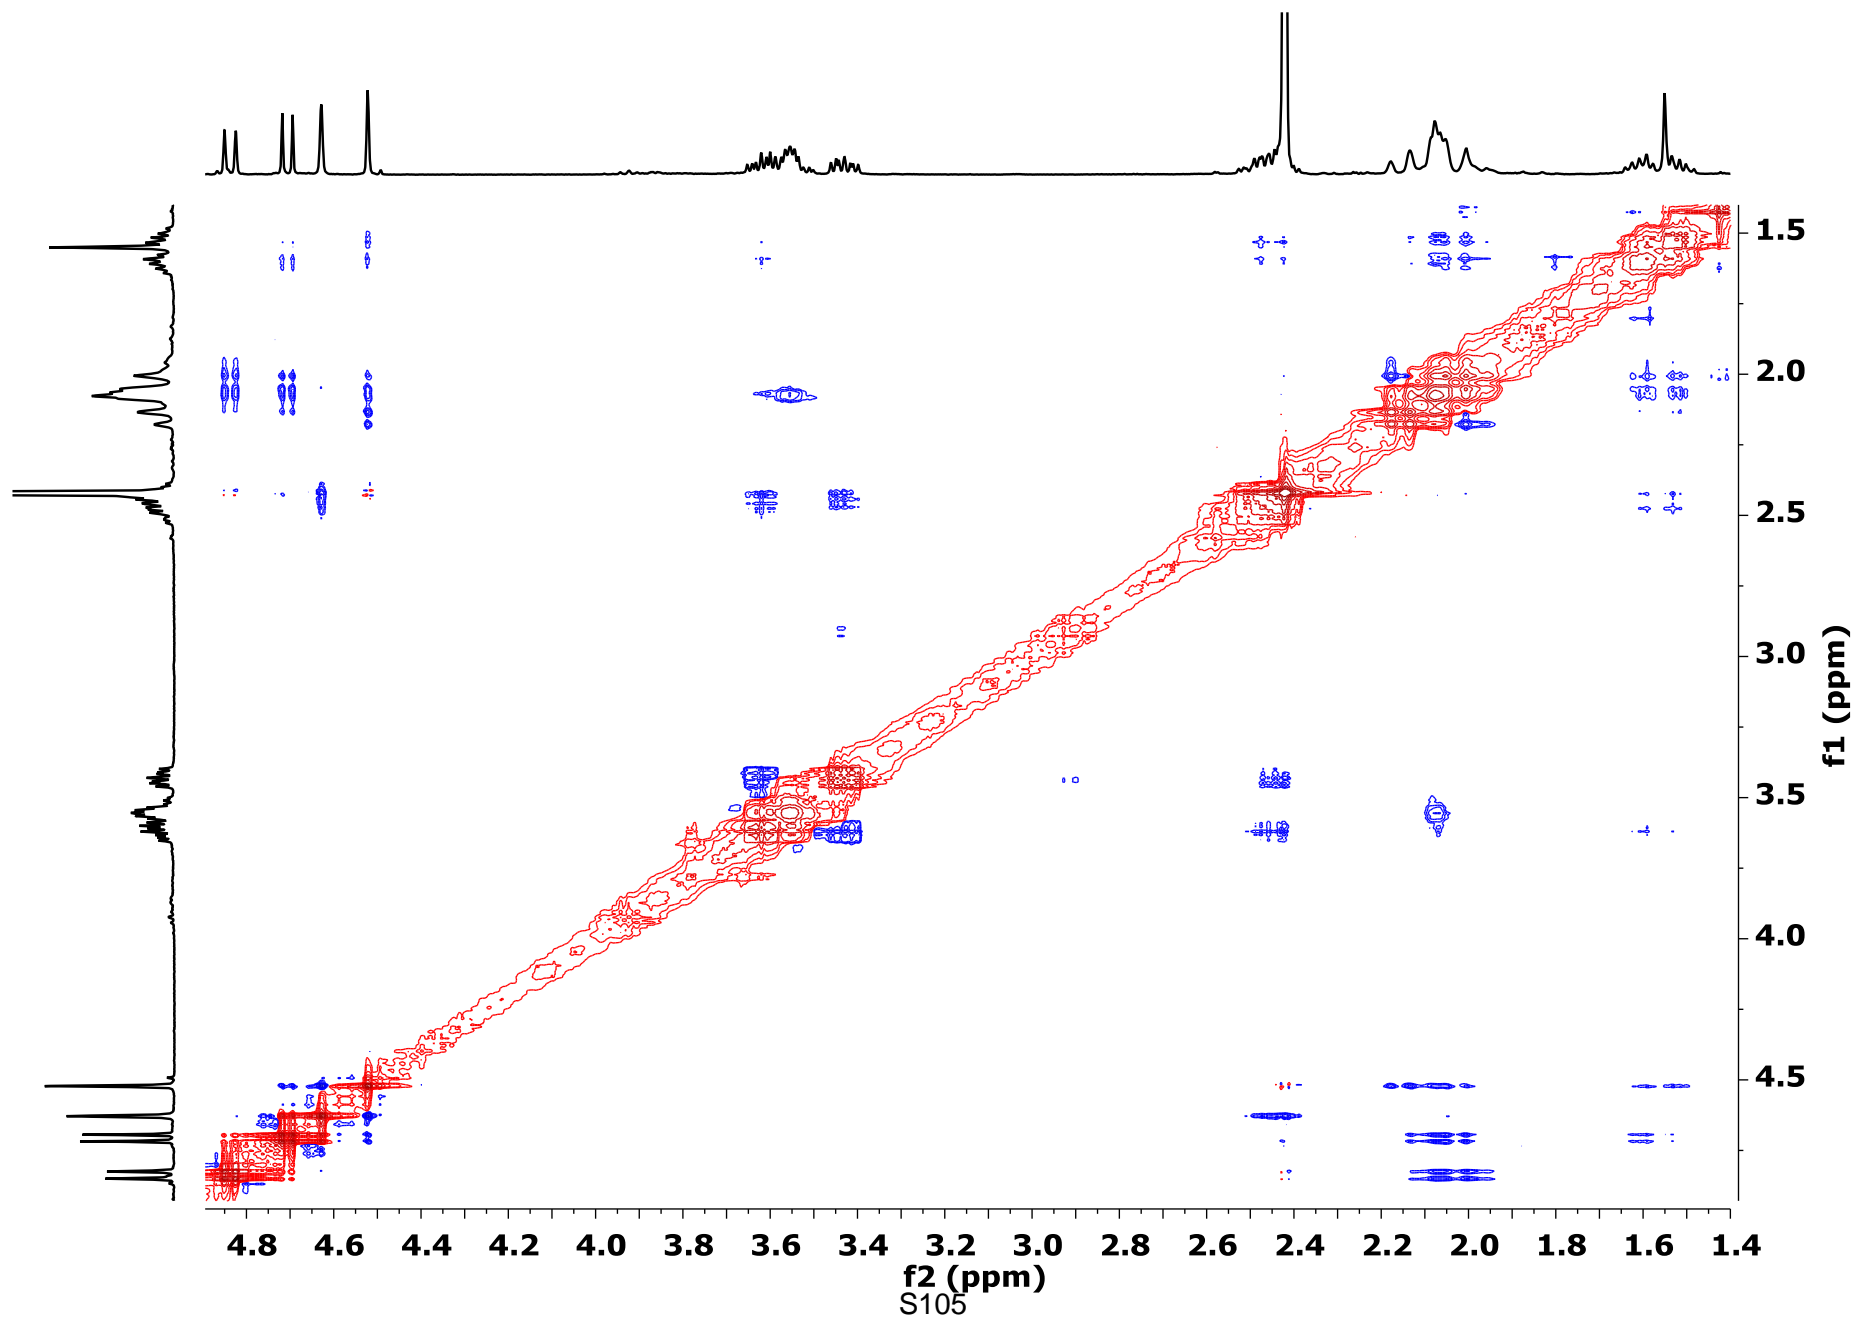

## HPLC

**Figure S1. HPLC trace of compound 3aa obtained using ( $\pm$ )-BINAP as a phosphine ligand.**

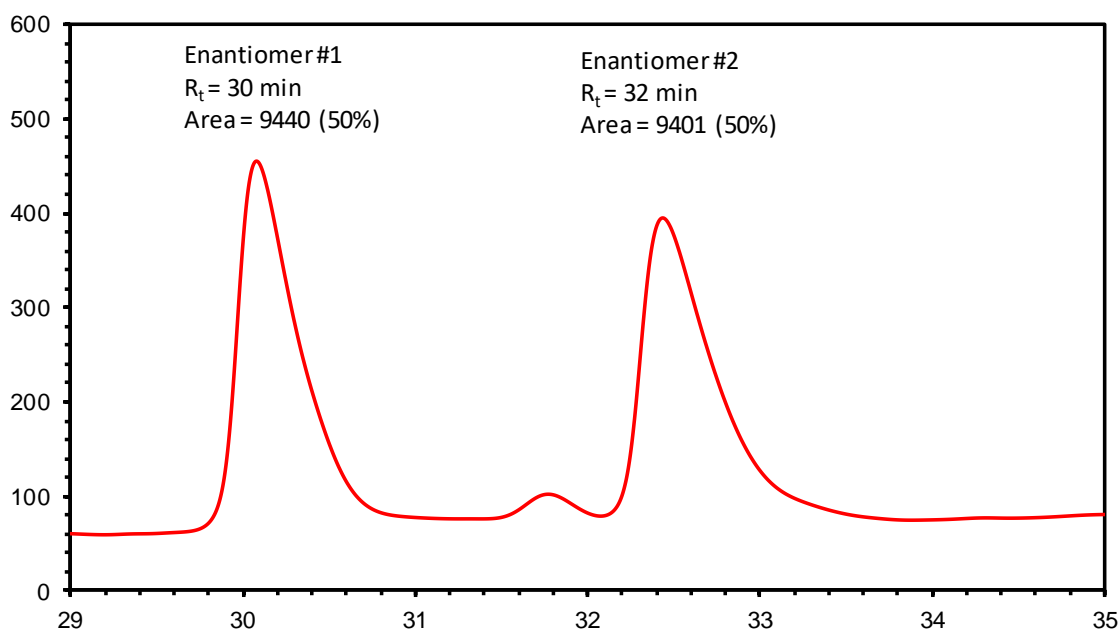

Conditions: Chiralpak IA column (4.6 x 250 mm, 5  $\mu$ m); 1 mL/min flow rate; 100% hexane  $\rightarrow$  20% 2-propanol in hexane; 40 min.;  $\lambda = 254$  nm.

**Figure S2. HPLC trace of compound 3aa obtained under optimal conditions, using (*R*)-DTBM-Segphos as a phosphine ligand.**

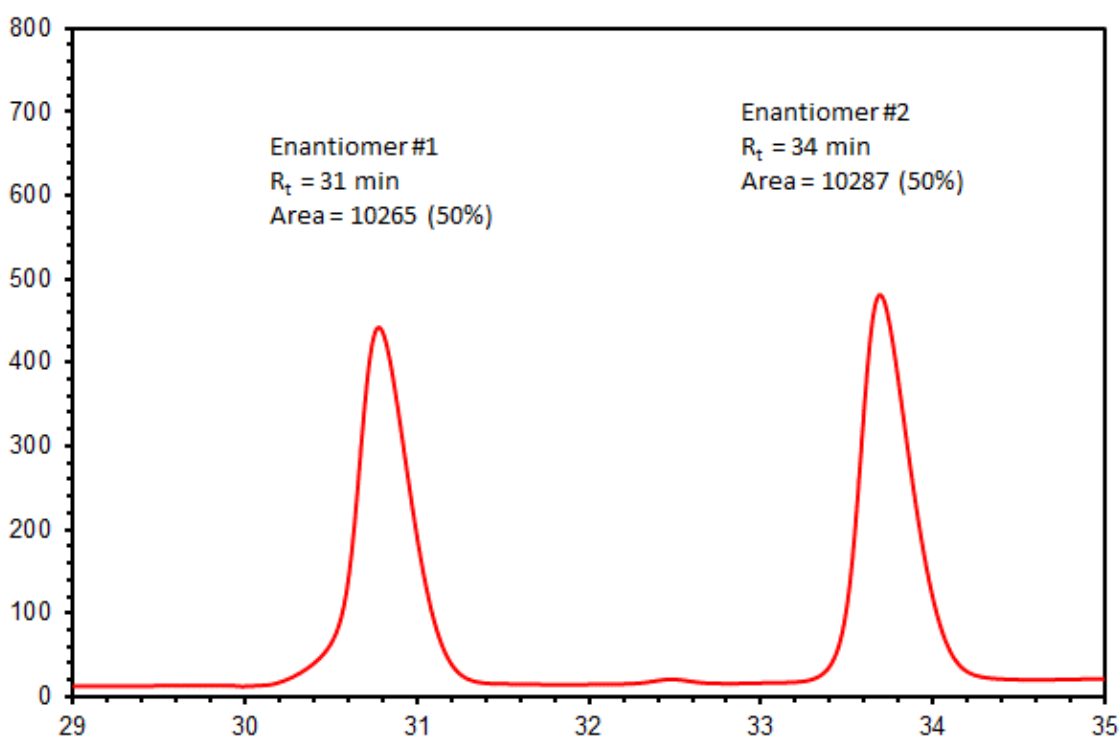

Conditions: Chiralpak IA column (4.6 x 250 mm, 5  $\mu$ m); 1 mL/min flow rate; 100% hexane  $\rightarrow$  20% 2-propanol in hexane; 40 min.;  $\lambda = 254$  nm.

## Crystal structure of compound 3am

Figure S3: ORTEP representation of compound 3am with probability level of 30%.

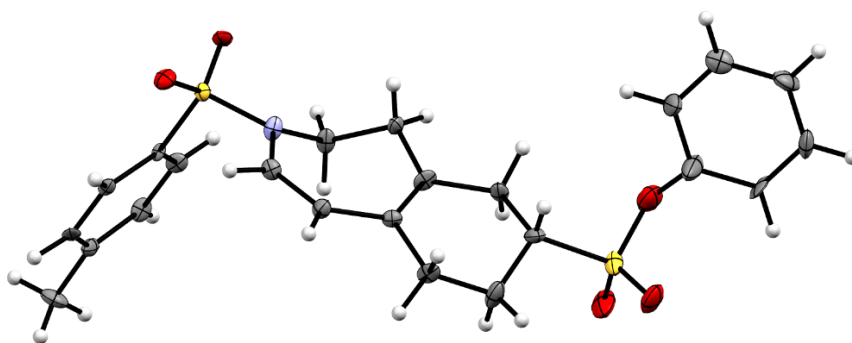

Colourless needle-like crystals of **3am** were grown at 2-6 °C using a layered solution approach. The bottom solution layer, contained within a long straight tube, consisted of the compound **3am** dissolved in CH<sub>2</sub>Cl<sub>2</sub>. Pentane was carefully placed on top using a syringe. The X-ray intensity data were measured on a three-circle diffractometer system equipped with a Ceramic x-ray tube (Mo K $\alpha$ ,  $\lambda$  = 0.71073 Å) and a doubly curved silicon crystal Bruker Triumph monochromator.

A total of 546 frames were collected. The total exposure time was 9.10 hours. The frames were integrated with the Bruker SAINT software package using a narrow-frame algorithm. The integration of the data using a **monoclinic** unit cell yielded a total of **15117** reflections to a maximum  $\theta$  angle of **27.55°** (**0.77** Å resolution), of which **4959** were independent (average redundancy **3.048**, completeness = **98.7%**,  $R_{\text{int}}$  = **4.56%**,  $R_{\text{sig}}$  = **5.51%**) and **4430** (**89.33%**) were greater than  $2\sigma(F^2)$ . The final cell constants of  $a$  = **11.7010(15)** Å,  $b$  = **7.8929(11)** Å,  $c$  = **11.8094(14)** Å,  $\beta$  = **94.717(4)°**, volume = **1087.0(2)** Å<sup>3</sup>, are based upon the refinement of the XYZ-centroids of **8874** reflections above  $20\sigma(I)$  with **6.214°** <  $2\theta$  < **54.22°**. Data were corrected for absorption effects using the Multi-Scan method (SADABS). The ratio of minimum to maximum apparent transmission was **0.619**. The calculated minimum and maximum transmission coefficients (based on crystal size) are **0.9080** and **0.9780**.

The structure was solved and refined using the Bruker SHELXTL Software Package, using the space group **P 1 21 1**, with  $Z$  = **2** for the formula unit, **C<sub>23</sub>H<sub>25</sub>NO<sub>5</sub>S<sub>2</sub>**. The final anisotropic full-matrix least-squares refinement on  $F^2$  with **270** variables converged at  $R1$  = **12.75%**, for the observed data and  $wR2$  = **33.18%** for all data. The goodness-of-fit was **1.109**. The largest peak in the final difference electron density synthesis was **2.362** e<sup>-</sup>/Å<sup>3</sup> and the largest hole was **-0.894** e<sup>-</sup>/Å<sup>3</sup> with an RMS deviation of **0.176** e<sup>-</sup>/Å<sup>3</sup>. On the basis of the final model, the calculated density was **1.404** g/cm<sup>3</sup> and  $F(000)$ , **484** e<sup>-</sup>.

**Table S2. Sample and crystal data for 3am.**

|                        |                                                                |                |
|------------------------|----------------------------------------------------------------|----------------|
| Identification code    | vilavadri1_2on                                                 |                |
| Chemical formula       | C <sub>23</sub> H <sub>25</sub> NO <sub>5</sub> S <sub>2</sub> |                |
| Formula weight         | 459.56 g/mol                                                   |                |
| Temperature            | 100(2) K                                                       |                |
| Wavelength             | 0.71073 Å                                                      |                |
| Crystal size           | 0.080 x 0.100 x 0.350 mm                                       |                |
| Crystal habit          | colorless needle                                               |                |
| Crystal system         | monoclinic                                                     |                |
| Space group            | P 1 21 1                                                       |                |
| Unit cell dimensions   | a = 11.7010(15) Å                                              | α = 90°        |
|                        | b = 7.8929(11) Å                                               | β = 94.717(4)° |
|                        | c = 11.8094(14) Å                                              | γ = 90°        |
| Volume                 | 1087.0(2) Å <sup>3</sup>                                       |                |
| Z                      | 2                                                              |                |
| Density (calculated)   | 1.404 g/cm <sup>3</sup>                                        |                |
| Absorption coefficient | 0.281 mm <sup>-1</sup>                                         |                |
| F(000)                 | 484                                                            |                |

**Table S3. Data collection and structure refinement for 3am.**

|                                     |                                                                                                                                                                        |                           |
|-------------------------------------|------------------------------------------------------------------------------------------------------------------------------------------------------------------------|---------------------------|
| Diffractometer                      | Bruker D8 QUEST ECO three-circle diffractometer                                                                                                                        |                           |
| Radiation source                    | Ceramic x-ray tube (Mo Kα, λ = 0.71073 Å)                                                                                                                              |                           |
| Theta range for data collection     | 3.11 to 27.55°                                                                                                                                                         |                           |
| Index ranges                        | -15 ≤ h ≤ 15, -10 ≤ k ≤ 10, -13 ≤ l ≤ 15                                                                                                                               |                           |
| Reflections collected               | 15117                                                                                                                                                                  |                           |
| Independent reflections             | 4959 [R(int) = 0.0456]                                                                                                                                                 |                           |
| Coverage of independent reflections | 98.7%                                                                                                                                                                  |                           |
| Absorption correction               | Multi-Scan                                                                                                                                                             |                           |
| Max. and min. transmission          | 0.9780 and 0.9080                                                                                                                                                      |                           |
| Structure solution technique        | direct methods                                                                                                                                                         |                           |
| Structure solution program          | SHELXT 2014/5 (Sheldrick, 2014)                                                                                                                                        |                           |
| Refinement method                   | Full-matrix least-squares on F <sup>2</sup>                                                                                                                            |                           |
| Refinement program                  | SHELXL-2017/1 (Sheldrick, 2017)                                                                                                                                        |                           |
| Function minimized                  | Σ w(F <sub>o</sub> <sup>2</sup> - F <sub>c</sub> <sup>2</sup> ) <sup>2</sup>                                                                                           |                           |
| Data / restraints / parameters      | 4959 / 1 / 270                                                                                                                                                         |                           |
| Goodness-of-fit on F <sup>2</sup>   | 1.109                                                                                                                                                                  |                           |
| Final R indices                     | 4430 data;<br>I > 2σ(I)                                                                                                                                                | R1 = 0.1275, wR2 = 0.3229 |
|                                     | all data                                                                                                                                                               | R1 = 0.1388, wR2 = 0.3318 |
| Weighting scheme                    | w = 1/[σ <sup>2</sup> (F <sub>o</sub> <sup>2</sup> ) + (0.1482P) <sup>2</sup> + 10.0620P]<br>where P = (F <sub>o</sub> <sup>2</sup> + 2F <sub>c</sub> <sup>2</sup> )/3 |                           |
| Absolute structure parameter        | 0.3(3)                                                                                                                                                                 |                           |
| Largest diff. peak and hole         | 2.362 and -0.894 eÅ <sup>-3</sup>                                                                                                                                      |                           |



R.M.S. deviation from mean    0.176 eÅ<sup>-3</sup>

**Table S4. Atomic coordinates and equivalent isotropic atomic displacement parameters (Å<sup>2</sup>) for 3am.**

U(eq) is defined as one third of the trace of the orthogonalized U<sub>ij</sub> tensor.

|     | <b>x/a</b> | <b>y/b</b> | <b>z/c</b> | <b>U(eq)</b> |
|-----|------------|------------|------------|--------------|
| S22 | 0.7508(2)  | 0.7786(4)  | 0.4966(2)  | 0.0187(5)    |
| S8  | 0.3208(2)  | 0.2537(5)  | 0.9766(2)  | 0.0328(8)    |
| O7  | 0.2231(11) | 0.3852(16) | 0.9631(11) | 0.055(3)     |
| O9  | 0.2747(11) | 0.0761(16) | 0.9868(11) | 0.054(3)     |
| O10 | 0.3974(10) | 0.299(2)   | 0.0674(9)  | 0.067(4)     |
| O23 | 0.6954(7)  | 0.9390(11) | 0.5040(9)  | 0.033(2)     |
| O24 | 0.7636(8)  | 0.7001(12) | 0.3889(7)  | 0.0304(19)   |
| N16 | 0.6753(9)  | 0.6437(13) | 0.5674(9)  | 0.026(2)     |
| C1  | 0.1129(5)  | 0.3162(18) | 0.9130(8)  | 0.081(9)     |
| C2  | 0.0361(7)  | 0.2471(16) | 0.9841(6)  | 0.043(4)     |
| C3  | 0.9196(6)  | 0.2440(14) | 0.9501(7)  | 0.041(3)     |
| C4  | 0.8797(5)  | 0.3100(14) | 0.8451(8)  | 0.045(4)     |
| C5  | 0.9565(8)  | 0.3791(13) | 0.7740(6)  | 0.037(3)     |
| C6  | 0.0731(7)  | 0.3822(16) | 0.8080(7)  | 0.050(4)     |
| C11 | 0.3904(11) | 0.272(2)   | 0.8482(10) | 0.035(3)     |
| C12 | 0.4224(10) | 0.4510(14) | 0.8256(12) | 0.027(2)     |
| C13 | 0.5061(11) | 0.4671(14) | 0.7322(10) | 0.024(2)     |
| C14 | 0.5154(10) | 0.6445(15) | 0.6939(11) | 0.025(2)     |
| C15 | 0.6381(10) | 0.7007(14) | 0.6792(11) | 0.027(2)     |
| C17 | 0.6890(10) | 0.4717(15) | 0.5488(10) | 0.024(2)     |
| C18 | 0.6430(11) | 0.3379(16) | 0.6040(10) | 0.026(2)     |
| C19 | 0.5647(10) | 0.3317(14) | 0.6954(9)  | 0.021(2)     |
| C20 | 0.5449(13) | 0.1513(16) | 0.7395(11) | 0.031(3)     |
| C21 | 0.4875(14) | 0.1507(18) | 0.8506(13) | 0.041(3)     |
| C25 | 0.8875(8)  | 0.7910(13) | 0.5702(7)  | 0.0132(17)   |
| C26 | 0.9767(10) | 0.7015(13) | 0.5319(9)  | 0.021(2)     |
| C27 | 0.0861(10) | 0.7148(15) | 0.5913(11) | 0.026(2)     |
| C28 | 0.1024(10) | 0.8117(17) | 0.6897(11) | 0.032(3)     |
| C29 | 0.0115(10) | 0.9051(15) | 0.7243(10) | 0.025(2)     |
| C30 | 0.9029(10) | 0.8939(14) | 0.6667(10) | 0.023(2)     |
| C31 | 0.2176(11) | 0.8270(19) | 0.7568(12) | 0.037(3)     |

## Computational methods

Geometries of all stationary points were optimized without symmetry constraint with the Gaussian 09 program<sup>6</sup> using the DFT B3LYP hybrid exchange-correlation functional.<sup>7–9</sup> The all-electron cc-pVDZ basis set<sup>10,11</sup> was employed for non-metal atoms and the cc-pVDZ-PP basis set<sup>10</sup> containing an effective core relativistic pseudopotential was used for Rh. The electronic energy was improved by performing single point energy calculations with the cc-pVTZ (cc-pVTZ-PP for Rh) basis set and the M06L functional<sup>11</sup> and including solvent effects corrections computed with the solvent model based on density (SMD) continuum solvation.<sup>12</sup> To mimic the experimental solvent mixture with a molar fraction ratio of 76:24 of THF:CH<sub>2</sub>Cl<sub>2</sub>, the values of the solvent descriptors used in the SMD solvation model were re-defined on the basis of a linear behavior with the molar fraction. Using the “Solvent=(Generic,Read)” options of the Gaussian09 SCRF keyword, the solvent mixture was defined employing the following solvent descriptors: Dynamic Dielectric Constant=1.410; Static Dielectric Constant=1.4085; Abraham’s hydrogen bond acidity=0.02424; Abraham’s hydrogen bond basicity=0.3758; Surface Tension=39.3697; Carbon Aromaticity=0; Electronegativity Halogenicity=0.1617. The D3 Grimme energy corrections for dispersion<sup>13</sup> with the original damping function were added in all B3LYP/cc-pVDZ-PP and M06L/cc-pVTZ-PP calculations. Analytical Hessians were computed to determine the nature of stationary points (one and zero imaginary frequencies for TSs and minima, respectively) and to calculate unscaled zero-point energies (ZPEs) as well as thermal corrections and entropy effects using the standard statistical-mechanics relationships for an ideal gas.<sup>14</sup> These two latter terms were computed at 313.15 K and 1 atm to provide the reported relative Gibbs energies. As a summary, the reported Gibbs energies contain electronic energies including solvent effects calculated at the M06L-D3/cc-pVTZ-PP//B3LYP-D3/cc-pVDZ-PP level together with gas phase thermal and entropic contributions computed at 313.15 K and 1 atm with the B3LYP-D3/cc-pVDZ-PP method. The catalytic species employed for computational modelling is [Rh(BINAP)]<sup>+</sup>, noted as **[Rh]** in figures for simplification purposes. All stationary points were unambiguously confirmed by IRC calculations.

**Figure S4.** Molecular structures of (a) **TS A1A2**, (b) **TS A2A3**, (c) **TS A3A4**, (d) **TS A3'B1**, (e) **TS A5-3aa'** and (f) **TS A5-3aa**. Distances are given in Angstroms (Å). Hydrogen atoms not shown for clarity.

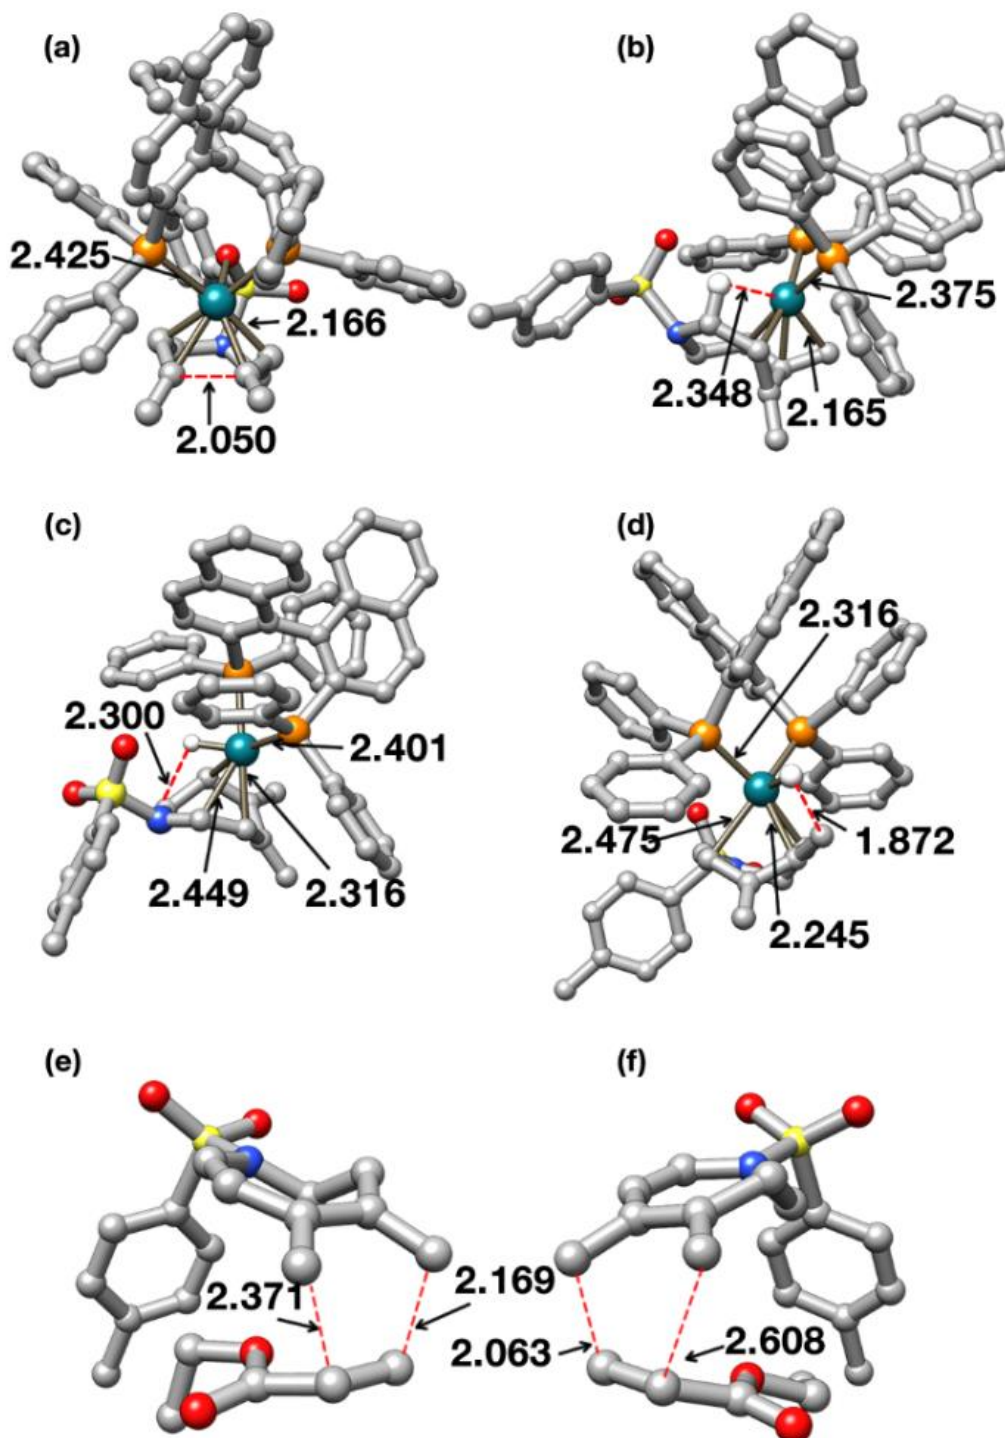

**Figure S5.** M06L-D3/cc-pVTZ-PP/SMD(76% THF, 24% CH<sub>2</sub>Cl<sub>2</sub>)/B3LYP-D3/cc-pVDZ-PP Gibbs energy profile for the tandem cycloisomerisation/Diels-Alder cycloaddition of 1,5-bisallene **1a** and ethyl acrylate catalysed by [Rh(BINAP)]<sup>+</sup>. **Alternative reaction path:** Diels-Alder cycloaddition involving intermediate **A4**.

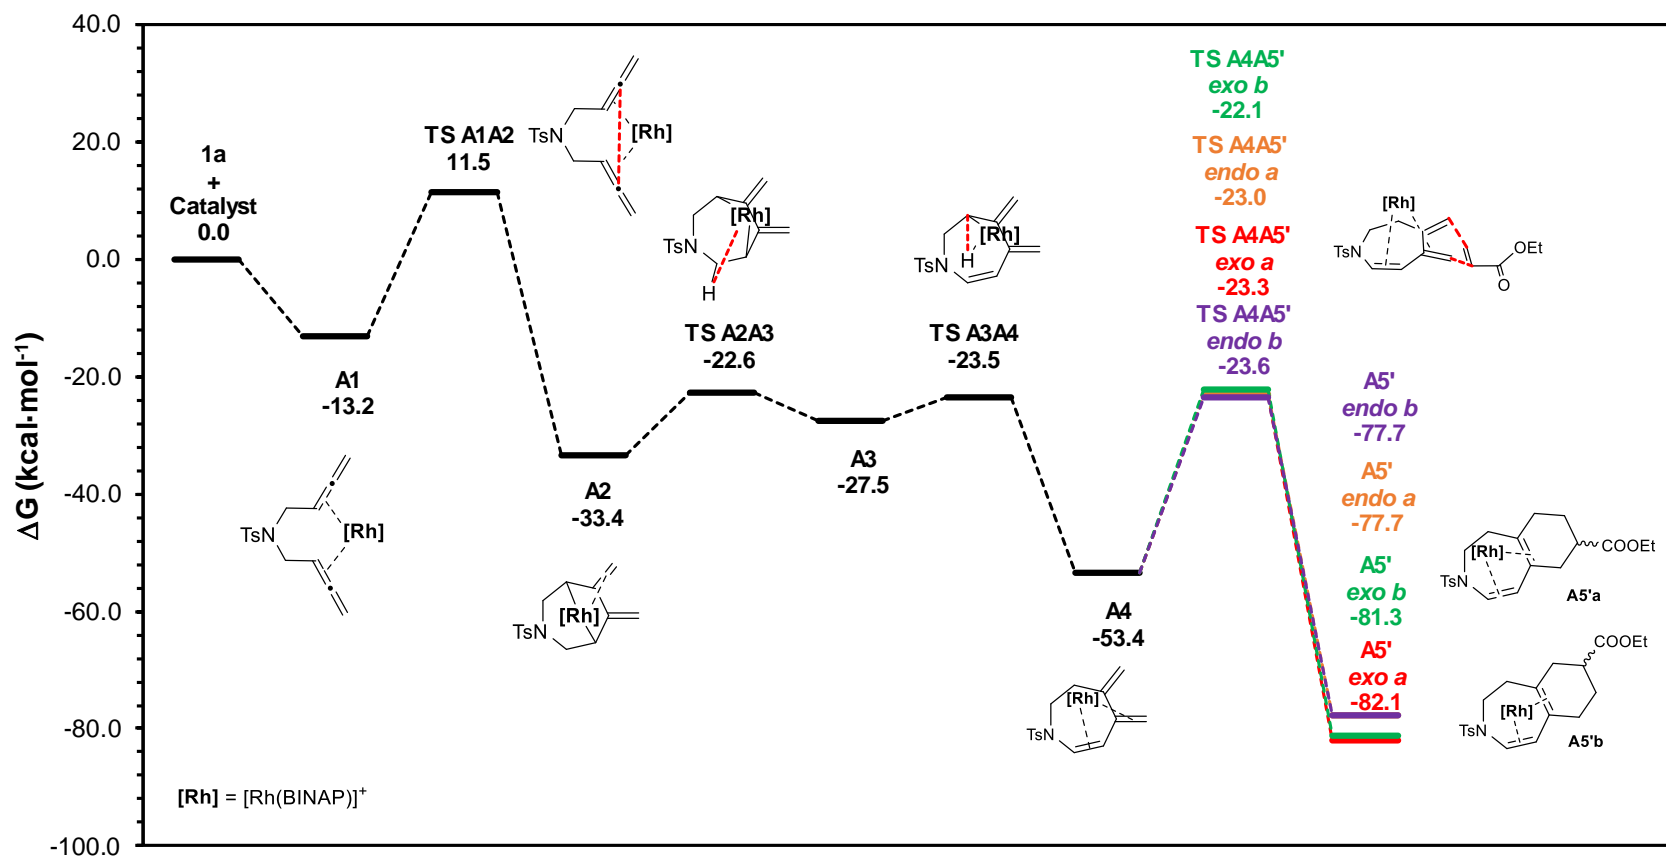

**Figure S6.** M06L-D3/cc-pVTZ-PP/SMD(76% THF, 24% CH<sub>2</sub>Cl<sub>2</sub>)/B3LYP-D3/cc-pVDZ-PP Gibbs energy profile for the tandem cycloisomerisation/Diels-Alder cycloaddition of 1,5-bisallene **1a** and ethyl acrylate catalysed by [Rh(BINAP)]<sup>+</sup>. **Alternative reaction path:** Diels-Alder cycloaddition involving intermediate **A3**.

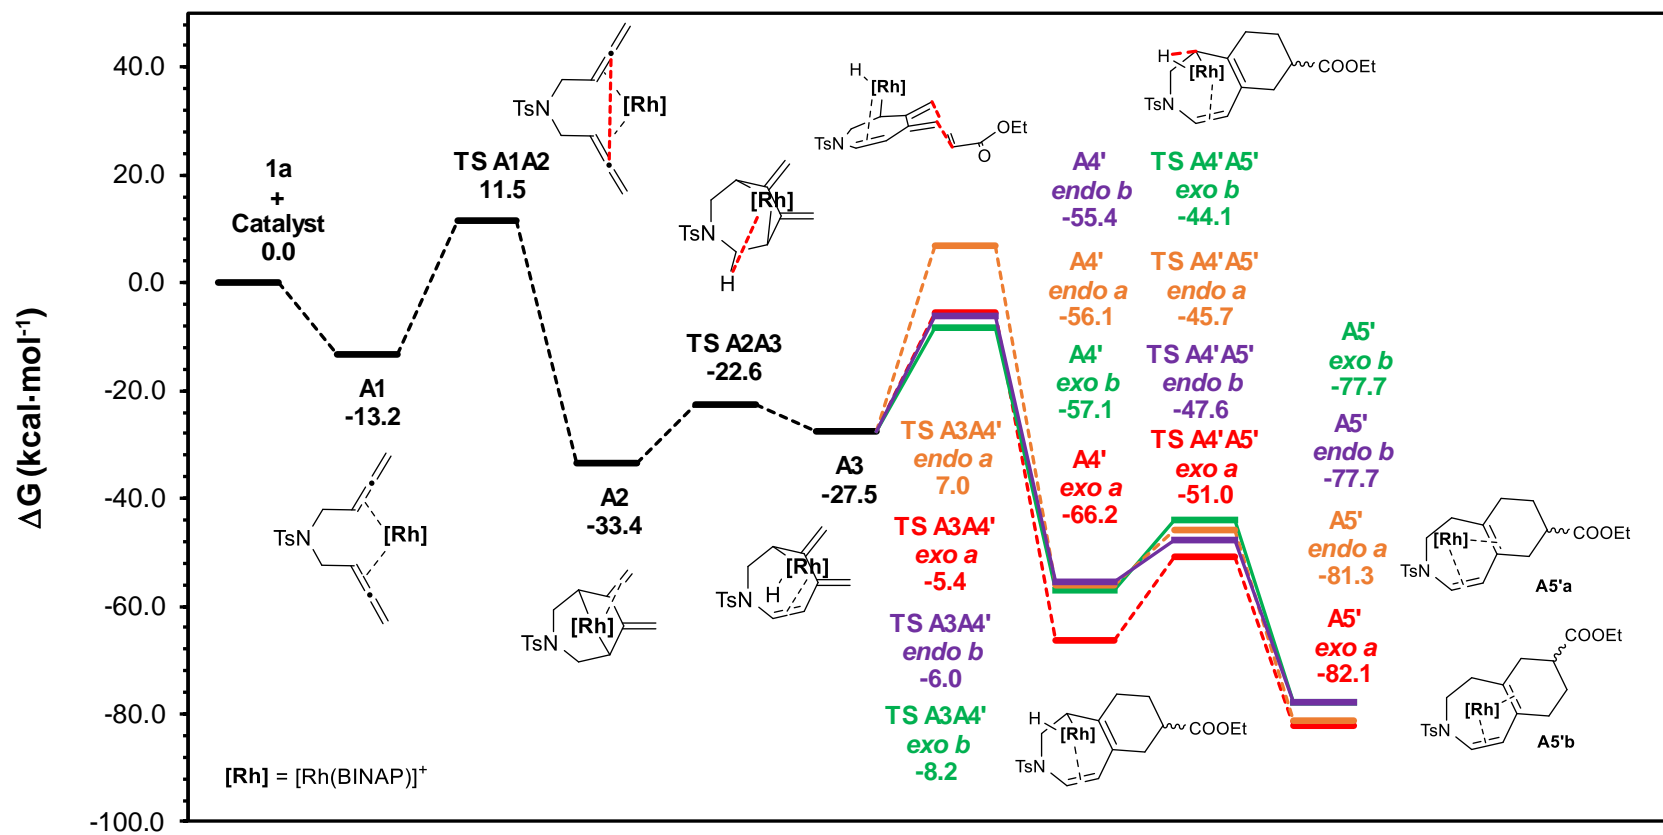

**Figure S7.** M06L-D3/cc-pVTZ-PP/SMD(76% THF, 24% CH<sub>2</sub>Cl<sub>2</sub>)/B3LYP-D3/cc-pVDZ-PP Gibbs energy profile for the tandem cycloisomerisation/Diels-Alder cycloaddition of 1,5-bisallene **1a** and ethyl acrylate catalysed by [Rh(BINAP)]<sup>+</sup>. **Alternative reaction path:** Diels-Alder cycloaddition involving intermediate **A2**.

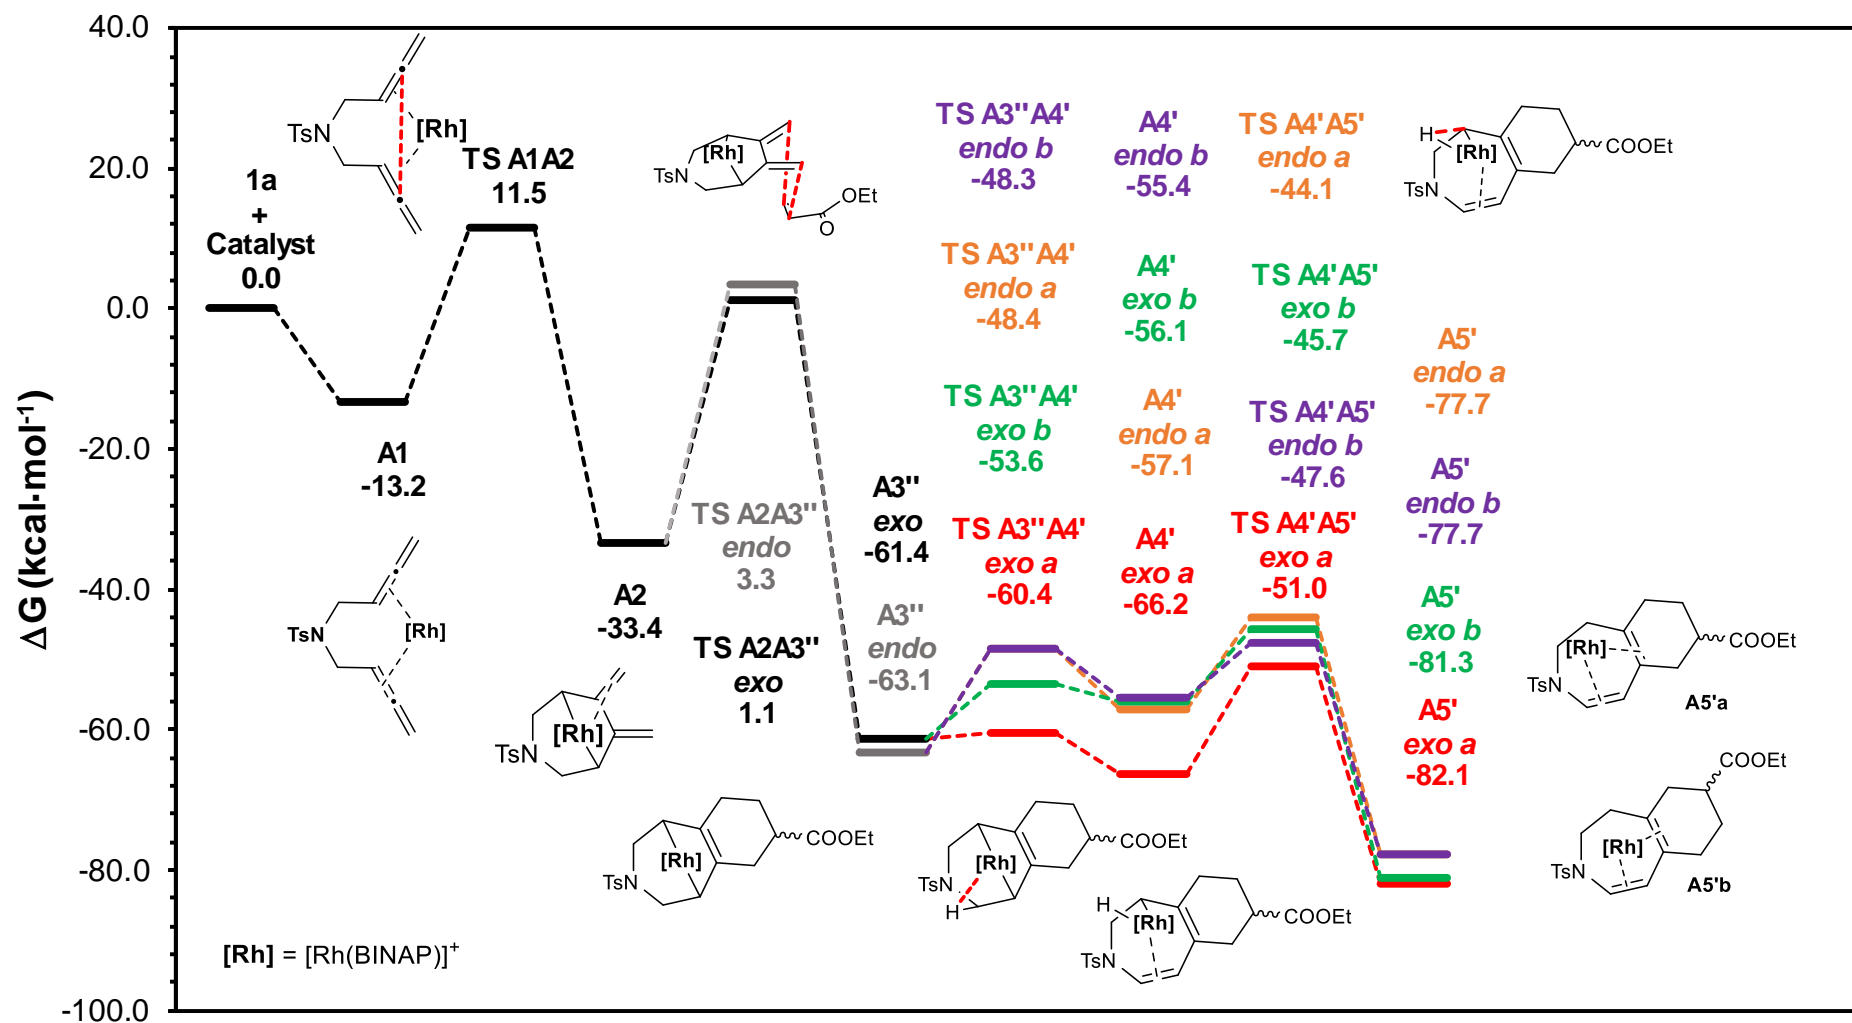

**Figure S8.** (a) M06L-D3/cc-pVTZ-PP/SMD(76% THF, 24% CH<sub>2</sub>Cl<sub>2</sub>)/B3LYP-D3/cc-pVDZ-PP Gibbs energy profile for the transformation of intermediate **C1** into intermediate **A2** catalysed by [Rh(BINAP)]<sup>+</sup>. (b) Molecular structure of **TS C1A2**. Distances are indicated in Angstroms (Å).  $\Delta G$  relative to **1a** + catalyst. Hydrogen atoms suppressed for clarity.

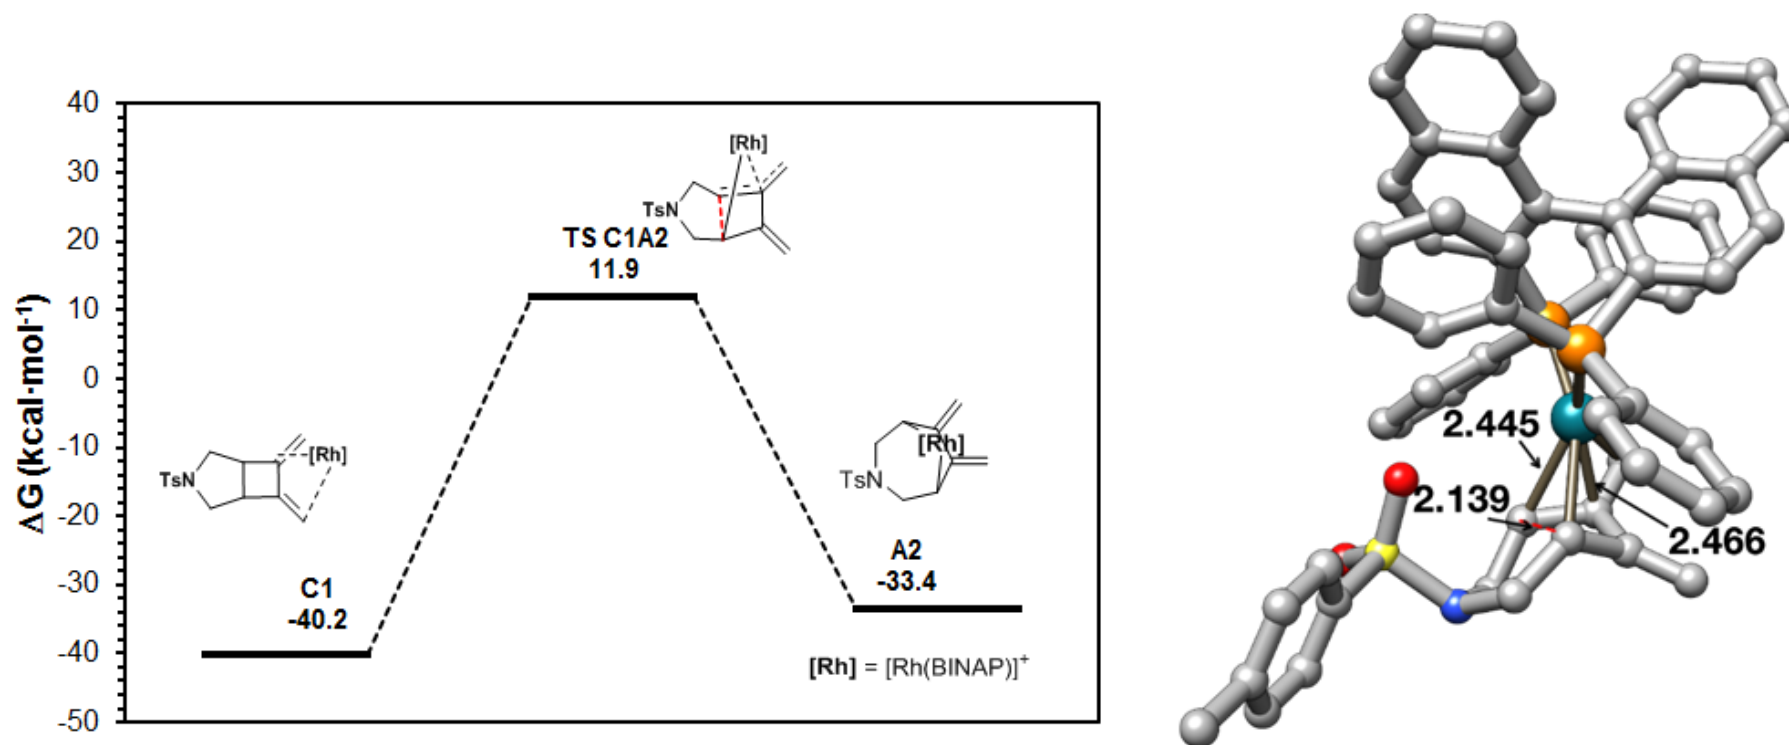

Intermediate **C1** (Chart 1) has to surmount a Gibbs energy barrier of 52.1 kcal/mol (**TS C1A2**) in order to be transformed into **A2**. The backward process is not energetically feasible either (**TS A2C1**,  $\Delta G^\ddagger = 45.3$  kcal/mol). Taken together, all these results show that the byproduct **5a** must be formed by a completely independent mechanism involving a Rh(I)-catalyzed [2+2] cycloaddition of the internal C=C bonds of 1,5-bisallene **1a**.<sup>15</sup>

## Computational data

All DFT data obtained within this study are provided through the following link:

<https://iochem.udg.edu:8443/browse/review-collection/100/660/236d90b68e822f98633662d5>

## References

- (1) Hashmi, A. S. K.; Häffner, T.; Rudolph, M.; Rominger, F. Gold Catalysis: Domino Reaction of En-Diynes to Highly Substituted Phenols. *Chem. - A Eur. J.* **2011**, *17*, 8195–8201.
- (2) Kang, S.-K.; Baik, T.-G.; Kulak, A. N.; Ha, Y.-H.; Lim, Y.; Park, J. Palladium-Catalyzed Carbocyclization/Silastannylation and Distannylation of Bis(Allenenes). *J. Am. Chem. Soc.* **2000**, *122*, 11529–11530.
- (3) Lu, P.; Ma, S. Observation of New Cycloisomerization Pattern of 1,5-Bisallenenes. Catalyst and Substituent Effects. *Org. Lett.* **2007**, *9*, 2095–2097.
- (4) Lu, P.; Kuang, J.; Ma, S. Carbon-Carbon Double-Bond Isomerization and Diels-Alder Reaction of Dimethyl 5-Methylene-4-Isopropylidene-2-Cycloheptene-1,1-Dicarboxylate with Dienophiles. *Synlett* **2010**, *2010*, 227–230.
- (5) Kawamura, T.; Inagaki, F.; Narita, S.; Takahashi, Y.; Hirata, S.; Kitagaki, S.; Mukai, C. Rhodium(I)-Catalyzed Intramolecular Carbonylative [2+2+1] Cycloadditions and Cycloisomerizations of Bis(Sulfonylallene)s. *Chem. - A Eur. J.* **2010**, *16*, 5173–5183.
- (6) Gaussian 09, Revision E.01, Frisch, M. J.; Trucks, G. W.; Schlegel, H. B.; Scuseria, G. E.; Robb, M. A.; Cheeseman, J. R.; Scalmani, G.; Barone, V.; Mennucci, B.; Petersson, G. A.; Nakatsuji, H.; Caricato, M.; Li, X.; Hratchian, H. P.; Izmaylov, A. F.; Bloino, J.; Zheng, G.; Sonnenberg, J. L.; Hada, M.; Ehara, M.; Toyota, K.; Fukuda, R.; Hasegawa, J.; Ishida, M.; Nakajima, T.; Honda, Y.; Kitao, O.; Nakai, H.; Vreven, T.; Montgomery, J. A., Jr.; Peralta, J. E.; Ogliaro, F.; Bearpark, M.; Heyd, J. J.; Brothers, E.; Kudin, K. N.; Staroverov, V. N.; Kobayashi, R.; Normand, J.; Raghavachari, K.; Rendell, A.; Burant, J. C.; Iyengar, S. S.; Tomasi, J.; Cossi, M.; Rega, N.; Millam, J. M.; Klene, M.; Knox, J. E.; Cross, J. B.; Bakken, V.; Adamo, C.; Jaramillo, J.; Gomperts, R.; Stratmann, R. E.; Yazyev, O.; Austin, A. J.; Cammi, R.; Pomelli, C.; Ochterski, J. W.; Martin, R. L.; Morokuma, K.; Zakrzewski, V. G.; Voth, G. A.; Salvador, P.; Dannenberg, J. J.; Dapprich, S.; Daniels, A. D.; Farkas, Ö.; Foresman, J. B.; Ortiz, J. V.; Cioslowski, J.; Fox, D. J. Gaussian, Inc., Wallingford CT, 2009.
- (7) Stephens, P. J.; Devlin, F. J.; Chabalowski, C. F.; Frisch, M. J. Ab Initio Calculation of Vibrational Absorption and Circular Dichroism Spectra Using Density Functional Force Fields. *J. Phys. Chem.* **1994**, *98*, 11623–11627.
- (8) Becke, A. D. Density-functional Thermochemistry. III. The Role of Exact Exchange. *J. Chem. Phys.* **1993**, *98*, 5648–5652.
- (9) Lee, C.; Yang, W.; Parr, R. G. Development of the Colle-Salvetti Correlation-Energy Formula into a Functional of the Electron Density. *Phys. Rev. B* **1988**, *37*, 785–789.
- (10) Dunning, T. H. Gaussian Basis Sets for Use in Correlated Molecular Calculations. I. The



Atoms Boron through Neon and Hydrogen. *J. Chem. Phys.* **1989**, *90*, 1007–1023.

- (11) Woon, D. E.; Dunning, T. H. Gaussian Basis Sets for Use in Correlated Molecular Calculations. III. The Atoms Aluminum through Argon. *J. Chem. Phys.* **1993**, *98*, 1358–1371.
- (12) Marenich, A. V.; Cramer, C. J.; Truhlar, D. G. Universal Solvation Model Based on Solute Electron Density and on a Continuum Model of the Solvent Defined by the Bulk Dielectric Constant and Atomic Surface Tensions. *J. Phys. Chem. B* **2009**, *113*, 6378–6396.
- (13) Grimme, S.; Antony, J.; Ehrlich, S.; Krieg, H. A Consistent and Accurate Ab Initio Parametrization of Density Functional Dispersion Correction (DFT-D) for the 94 Elements H-Pu. *J. Chem. Phys.* **2010**, *132*, 154104.
- (14) Atkins, P.; De Paula, J. *The Elements of Physical Chemistry*, 3rd ed.; Oxford University Press: Oxford, 2006.
